# Supplementary material for: Highly luminescent lanthanide complexes sensitised by tertiary amide-linked carbostyril antennae
Source: Royal Society of Chemistry journal article supplement (doi:10.1039/c8dt01270a), 2018-01-01

## **Highly luminescent lanthanide complexes sensitised by tertiary amide-linked carbostyryl antennae**

Daniel Kovacs, Dulcie Phipps, Andreas Orthaber and K. Eszter Borbas\*

Department of Chemistry, Ångström Laboratory, Box 523, Uppsala University, 75120, Uppsala,  
Sweden

Email: [eszter.borbas@kemi.uu.se](mailto:eszter.borbas@kemi.uu.se)

|                                                              |            |
|--------------------------------------------------------------|------------|
| Crystallography                                              | <b>S2</b>  |
| Spectroscopic characterisation                               | <b>S8</b>  |
| $^1\text{H}$ and $^{13}\text{C}$ NMR spectra and HPLC traces | <b>S14</b> |

**X-ray diffraction data.** Measurements were performed using graphite-monochromatized Mo K $\alpha$  radiation at 150 K using a Bruker D8 APEX-II equipped with a CCD camera. The structure was solved by direct methods (SHELXS-2014) and refined by full-matrix least-squares techniques against  $F^2$  (SHELXL-2018). The non-hydrogen atoms were refined with anisotropic displacement parameters. The H atoms of the CH<sub>2</sub> / CH groups were refined with common isotropic displacement parameters for the H atoms of the same group and idealized geometry. The H atoms of the methyl groups were refined with common isotropic displacement parameters for the H atoms of the same group and idealized staggered geometry; one methyl group is modelled as a disordered staggered configuration.

Specific for **5a**:

NH protons are located on the difference map or placed at idealized positions. The cyclen ring shows a positional disorder which is modelled with an occupancy of 0.59 and 0.41 of the two different orientations, respectively.

Specific for **Dy9d**:

Solvent accessible voids were treated using the squeeze algorithm accounting for a 189 electrons in a 531 Å<sup>3</sup> large void. The final output of squeeze is appended to the cif file. In addition a refine prior to applying squeeze is attached.

CCDC 1832851 and 1833918 contain the supplementary crystallographic data for this paper. The data can be obtained free of charge from The Cambridge Crystallographic Data Centre via [www.ccdc.cam.ac.uk/structures](http://www.ccdc.cam.ac.uk/structures).

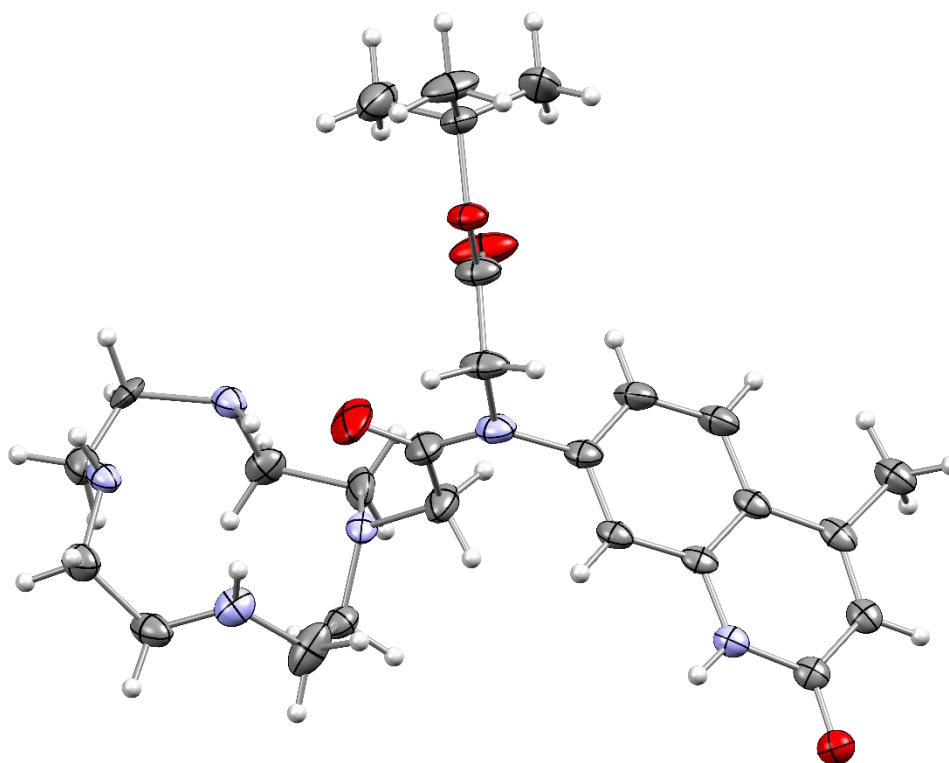

**Figure S1.** ORTEP plot of **5a**. Ellipsoids are drawn at a 30% probability level. For clarity, only one of the disordered cyclen parts is shown.

Table S1. Crystal data and structure refinement for **ao\_dks\_57\_059a\_1\_0m\_a**.

|                                   |                                                               |                             |
|-----------------------------------|---------------------------------------------------------------|-----------------------------|
| CCDC-No                           | 1832851                                                       |                             |
| Empirical formula                 | C <sub>26</sub> H <sub>40</sub> N <sub>6</sub> O <sub>4</sub> |                             |
| Formula weight                    | 500.64                                                        |                             |
| Temperature                       | 150(2) K                                                      |                             |
| Wavelength                        | 0.71073 Å                                                     |                             |
| Crystal system                    | Monoclinic                                                    |                             |
| Space group                       | P 21/n                                                        |                             |
| Unit cell dimensions              | $\alpha = 12.6859(9) \text{ Å}$                               | $\alpha = 90^\circ$ .       |
|                                   | $\beta = 14.9050(11) \text{ Å}$                               | $\beta = 94.431(2)^\circ$ . |
|                                   | $\gamma = 14.1864(11) \text{ Å}$                              | $\gamma = 90^\circ$ .       |
| Volume                            | 2674.4(3) Å <sup>3</sup>                                      |                             |
| Z                                 | 4                                                             |                             |
| Density (calculated)              | 1.243 Mg/m <sup>3</sup>                                       |                             |
| Absorption coefficient            | 0.085 mm <sup>-1</sup>                                        |                             |
| F(000)                            | 1080                                                          |                             |
| Crystal size                      | 0.2 x 0.12 x 0.1 mm <sup>3</sup>                              |                             |
| Theta range for data collection   | 2.075 to 26.398°.                                             |                             |
| Index ranges                      | -15 ≤ h ≤ 15, -18 ≤ k ≤ 18, -17 ≤ l ≤ 17                      |                             |
| Reflections collected             | 30611                                                         |                             |
| Independent reflections           | 5479 [R(int) = 0.0494]                                        |                             |
| Completeness to theta = 25.242°   | 100.0%                                                        |                             |
| Absorption correction             | Semi-empirical from equivalents                               |                             |
| Max. and min. transmission        | 0.7454 and 0.7088                                             |                             |
| Refinement method                 | Full-matrix least-squares on F <sup>2</sup>                   |                             |
| Data / restraints / parameters    | 5479 / 0 / 450                                                |                             |
| Goodness-of-fit on F <sup>2</sup> | 1.025                                                         |                             |
| Final R indices [I > 2σ(I)]       | R1 = 0.0618, wR2 = 0.1482                                     |                             |
| R indices (all data)              | R1 = 0.1098, wR2 = 0.1759                                     |                             |
| Extinction coefficient            | n/a                                                           |                             |
| Largest diff. peak and hole       | 0.254 and -0.227 e.Å <sup>-3</sup>                            |                             |

Table S2. Bond lengths [Å] and angles [°] for ao\_dks\_57\_059a\_1\_0m\_a.

---

|                   |           |
|-------------------|-----------|
| C(1)-O(0)         | 1.246(3)  |
| C(1)-N(1)         | 1.364(3)  |
| C(1)-C(2)         | 1.434(4)  |
| C(2)-C(3)         | 1.349(4)  |
| C(3)-C(4)         | 1.448(4)  |
| C(3)-C(10)        | 1.496(4)  |
| C(4)-C(5)         | 1.398(4)  |
| C(4)-C(9)         | 1.402(3)  |
| C(5)-C(6)         | 1.368(4)  |
| C(6)-C(7)         | 1.395(4)  |
| C(7)-C(8)         | 1.368(4)  |
| C(7)-N(2)         | 1.438(4)  |
| C(8)-C(9)         | 1.398(4)  |
| C(9)-N(1)         | 1.378(3)  |
| C(12)-N(2)        | 1.460(3)  |
| C(12)-C(13)       | 1.517(4)  |
| C(13)-O(3)        | 1.194(3)  |
| C(13)-O(4)        | 1.330(3)  |
| C(14)-O(4)        | 1.484(3)  |
| C(14)-C(16)       | 1.496(4)  |
| C(14)-C(15)       | 1.501(4)  |
| C(14)-C(17)       | 1.507(4)  |
| C(18)-O(2)        | 1.215(4)  |
| C(18)-N(2)        | 1.370(4)  |
| C(18)-C(19)       | 1.521(4)  |
| C(19)-N(10B)      | 1.365(11) |
| C(19)-N(10A)      | 1.537(7)  |
| O(0)-C(1)-N(1)    | 120.2(2)  |
| O(0)-C(1)-C(2)    | 124.1(2)  |
| N(1)-C(1)-C(2)    | 115.8(2)  |
| C(3)-C(2)-C(1)    | 123.0(3)  |
| C(2)-C(3)-C(4)    | 119.1(2)  |
| C(2)-C(3)-C(10)   | 121.4(3)  |
| C(4)-C(3)-C(10)   | 119.5(3)  |
| C(5)-C(4)-C(9)    | 117.6(3)  |
| C(5)-C(4)-C(3)    | 124.0(2)  |
| C(9)-C(4)-C(3)    | 118.4(2)  |
| C(6)-C(5)-C(4)    | 121.4(3)  |
| C(5)-C(6)-C(7)    | 120.0(3)  |
| C(8)-C(7)-C(6)    | 120.5(3)  |
| C(8)-C(7)-N(2)    | 119.6(2)  |
| C(6)-C(7)-N(2)    | 119.9(2)  |
| C(7)-C(8)-C(9)    | 119.3(2)  |
| N(1)-C(9)-C(8)    | 119.6(2)  |
| N(1)-C(9)-C(4)    | 119.2(2)  |
| C(8)-C(9)-C(4)    | 121.2(2)  |
| N(2)-C(12)-C(13)  | 112.3(2)  |
| O(3)-C(13)-O(4)   | 125.5(3)  |
| O(3)-C(13)-C(12)  | 125.2(3)  |
| O(4)-C(13)-C(12)  | 109.3(2)  |
| O(4)-C(14)-C(16)  | 109.8(2)  |
| O(4)-C(14)-C(15)  | 110.2(2)  |
| C(16)-C(14)-C(15) | 112.5(3)  |
| O(4)-C(14)-C(17)  | 101.9(2)  |

|                    |          |
|--------------------|----------|
| C(16)-C(14)-C(17)  | 111.2(3) |
| C(15)-C(14)-C(17)  | 110.8(3) |
| O(2)-C(18)-N(2)    | 120.6(3) |
| O(2)-C(18)-C(19)   | 123.2(3) |
| N(2)-C(18)-C(19)   | 116.1(3) |
| N(10B)-C(19)-C(18) | 102.1(5) |
| C(18)-C(19)-N(10A) | 116.6(3) |

---

Symmetry transformations used to generate equivalent atoms:

Table S3. Crystal data and structure refinement for **ao\_keb\_dk\_dy\_glyme\_1\_0m\_a**.

|                                               |                                                                  |                               |
|-----------------------------------------------|------------------------------------------------------------------|-------------------------------|
| CCDC-No                                       | 1833918                                                          |                               |
| Empirical formula                             | C <sub>30</sub> H <sub>40</sub> DyN <sub>6</sub> O <sub>12</sub> |                               |
| Formula weight                                | 824.19 [+ solvent]                                               |                               |
| Temperature                                   | 150(2) K                                                         |                               |
| Wavelength                                    | 0.71073 Å                                                        |                               |
| Crystal system                                | Triclinic                                                        |                               |
| Space group                                   | P -1                                                             |                               |
| Unit cell dimensions                          | $\alpha = 8.7962(2)$ Å                                           | $\alpha = 100.199(1)^\circ$ . |
|                                               | $\beta = 14.4010(4)$ Å                                           | $\beta = 98.078(1)^\circ$ .   |
|                                               | $\gamma = 17.6620(5)$ Å                                          | $\gamma = 107.476(1)^\circ$ . |
| Volume                                        | 2055.13(9) Å <sup>3</sup>                                        |                               |
| Z                                             | 2                                                                |                               |
| Density (calculated)                          | 1.332 Mg/m <sup>3</sup>                                          |                               |
| Absorption coefficient                        | 1.873 mm <sup>-1</sup>                                           |                               |
| F(000)                                        | 834                                                              |                               |
| Crystal size                                  | 0.12 x 0.10 x 0.04 mm <sup>3</sup>                               |                               |
| Theta range for data collection (2 $\Theta$ ) | 3.412 to 61.754°.                                                |                               |
| Index ranges                                  | -12 ≤ h ≤ 12, -20 ≤ k ≤ 20, -25 ≤ l ≤ 24                         |                               |
| Reflections collected                         | 46688                                                            |                               |
| Independent reflections                       | 12686 [R(int) = 0.0474]                                          |                               |
| Completeness to theta = 25.242°               | 99.9%                                                            |                               |
| Absorption correction                         | Semi-empirical from equivalents                                  |                               |
| Max. and min. transmission                    | 0.7461 and 0.6008                                                |                               |
| Refinement method                             | Full-matrix least-squares on F <sup>2</sup>                      |                               |
| Data / restraints / parameters                | 12686/2/451                                                      |                               |
| Goodness-of-fit on F <sup>2</sup>             | 0.998                                                            |                               |
| Final R indices [I > 2σ(I)]                   | R1 = 0.0318, wR2 = 0.0686                                        |                               |
| R indices (all data)                          | R1 = 0.0396, wR2 = 0.0708                                        |                               |
| Largest diff. peak and hole                   | 1.63 and -1.25 e.Å <sup>-3</sup>                                 |                               |

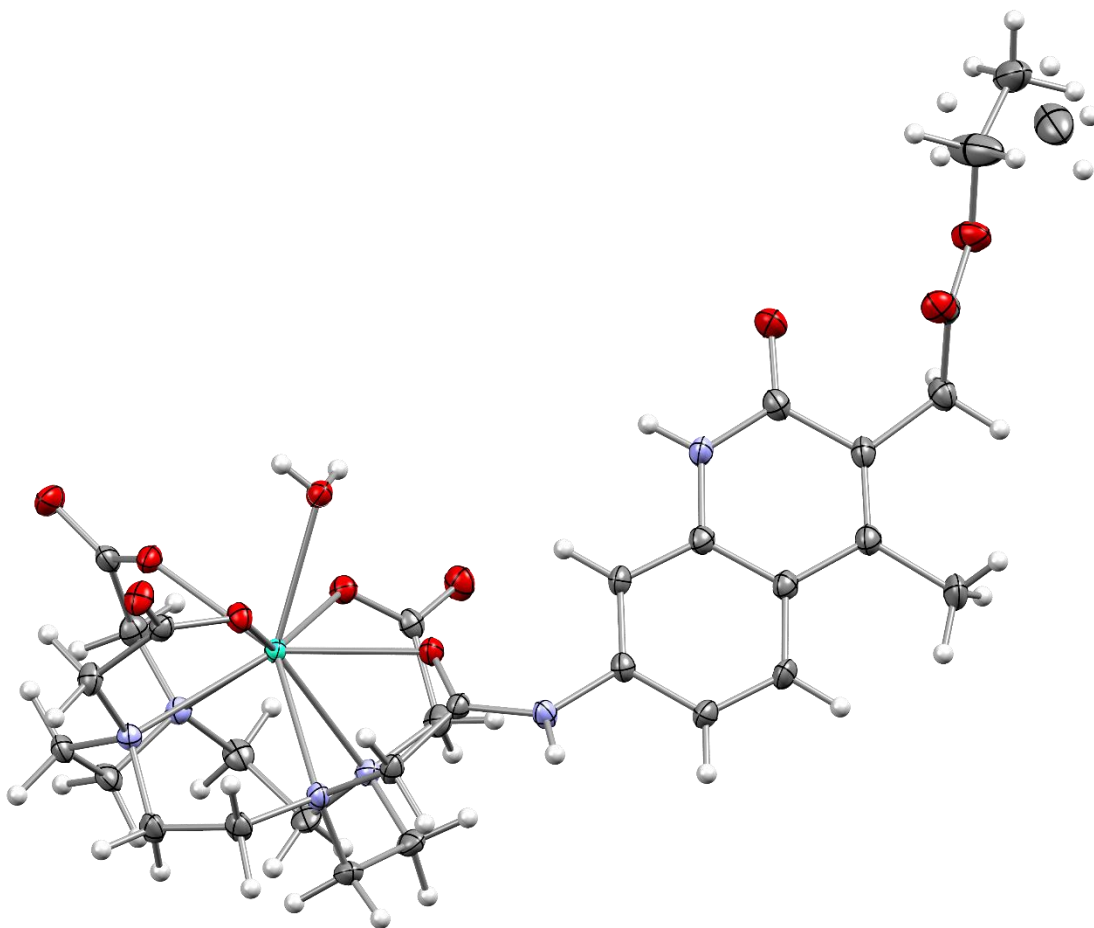

**Figure S2.** ORTEP plot of **Dy9d**. Ellipsoids are drawn at a 50% probability level.

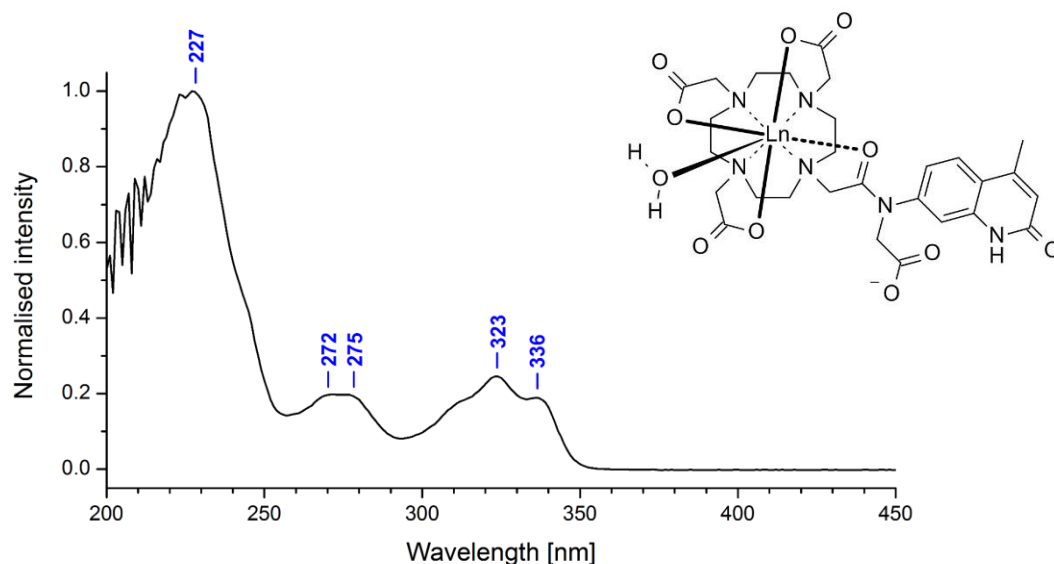

**Figure S3.** Normalised absorption spectrum of **Gd1a** in 0.01 M PIPES-buffered aqueous solution, pH 6.5. Blue numbers show local maxima of the spectra.

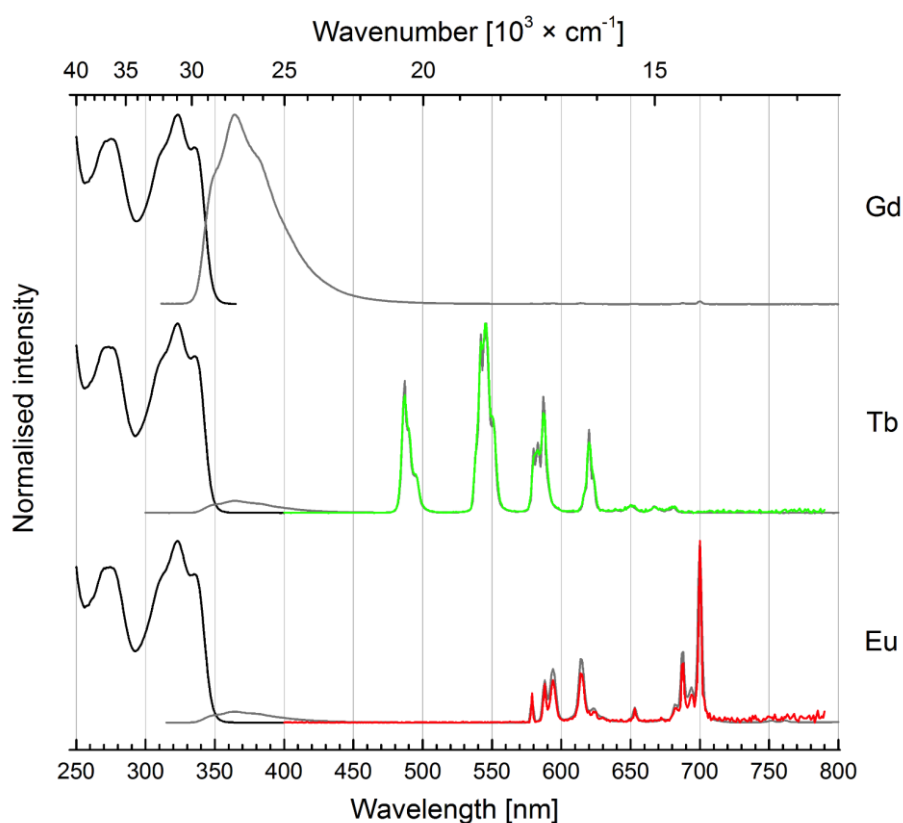

**Figure S4.** Excitation spectra of the Ln-centered emissions (Tb 545 nm, Eu 700 nm) and of the ligand centered emission (**Gd1a** 364 nm) at 298 K (black lines, left). Steady-state emission spectra of **Ln1a** at 298 K (grey lines, right) and time-resolved emission spectra showing the Ln-centered emissions (Tb (green), Eu (red), 298 K, coloured lines, right). Excitation at  $\lambda_{\text{ex}} = 336$  nm; [**Ln1a**] = nominally  $3.0 \times 10^{-5}$  M, PIPES-buffered aqueous solutions 0.01 M, pH 6.5.



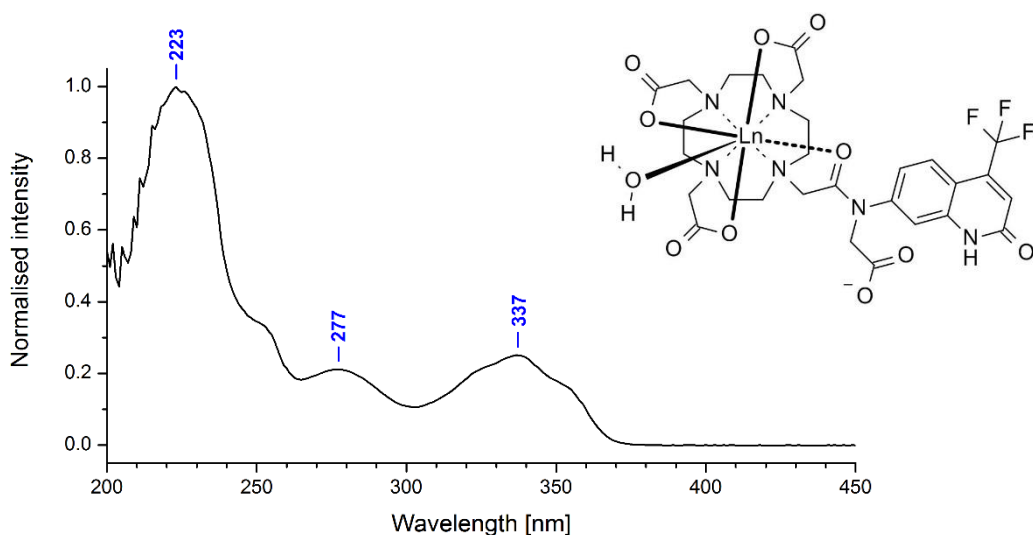

**Figure S5.** Normalised absorption spectrum of **Gd1b** in 0.01 M PIPES-buffered aqueous solution, pH 6.5. Blue numbers show local maxima of the spectra.

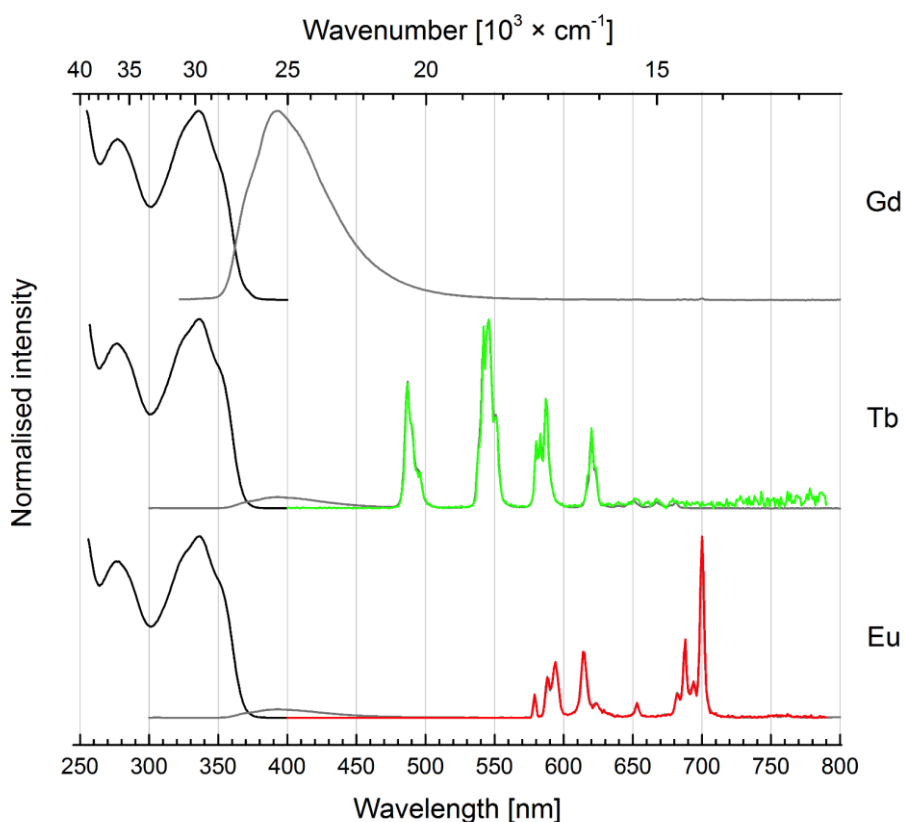

**Figure S6.** Excitation spectra of the Ln-centered emissions (Tb 545 nm, Eu 700 nm) and of the ligand centered emission (**Gd1b** 393 nm) at 298 K (black lines, left). Steady-state emission spectra of **Ln1b** at 298 K (grey lines, right) and time-resolved emission spectra showing the Ln-centered emissions (Tb (green), Eu (red), 298 K, coloured lines, right). Excitation at  $\lambda_{\text{ex}} = 336$  nm; [**Ln1b**] = nominally  $3.0 \times 10^{-5}$  M, PIPES-buffered aqueous solutions 0.01 M, pH 6.5.

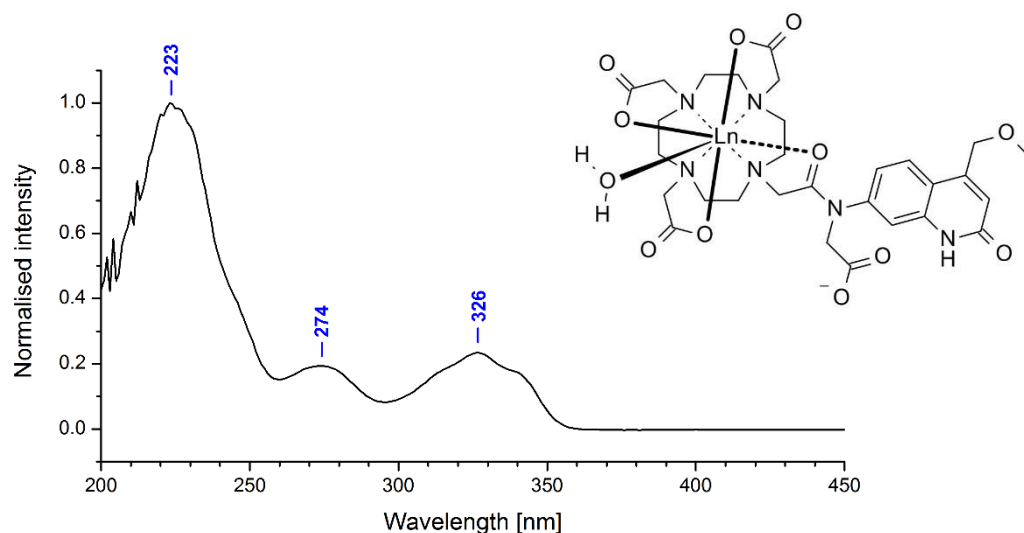

**Figure S7.** Normalised absorption spectrum of **Gd1c** in 0.01 M PIPES-buffered aqueous solution, pH 6.5. Blue numbers show local maxima of the spectra.

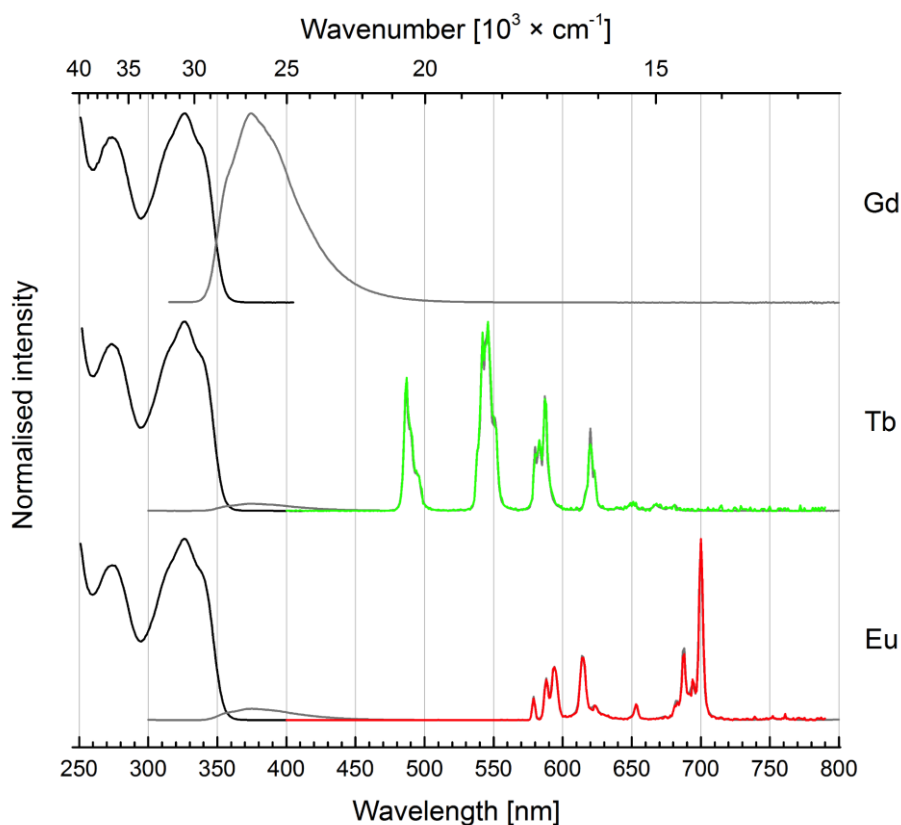

**Figure S8.** Excitation spectra of the Ln-centered emissions (Tb 545 nm, Eu 700 nm) and of the ligand centered emission (**Gd1c** 374 nm) at 298 K (black lines, left). Steady-state emission spectra of **Ln1c** at 298 K (grey lines, right) and time-resolved emission spectra showing the Ln-centered emissions (Tb (green), Eu (red), 298 K, coloured lines, right). Excitation at  $\lambda_{\text{ex}} = 336$  nm; [**Ln1c**] = nominally  $3.0 \times 10^{-5}$  M, PIPES-buffered aqueous solutions 0.01 M, pH 6.5.

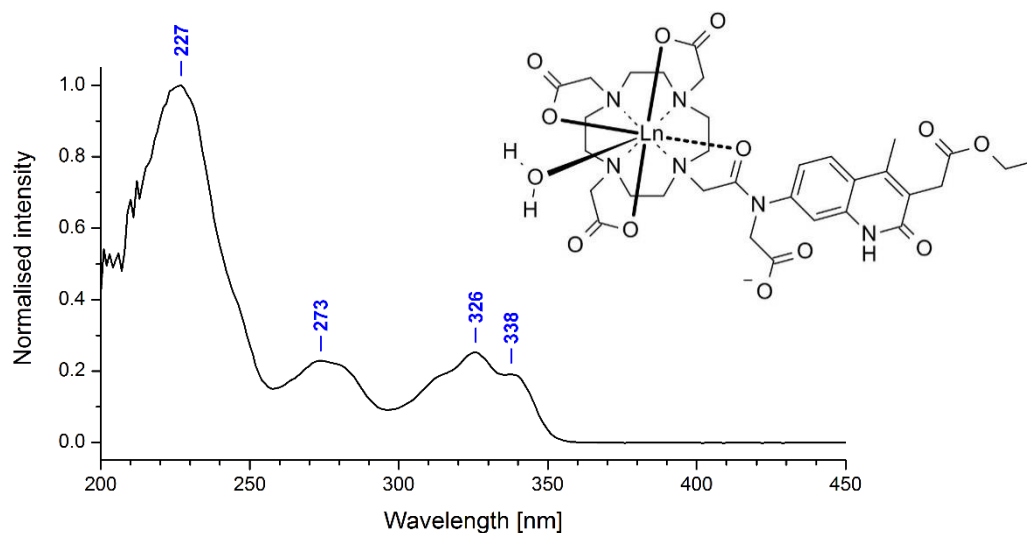

**Figure S9.** Normalised absorption spectrum of **Gd1d** in 0.01 M PIPES-buffered aqueous solution, pH 6.5. Blue numbers show local maxima of the spectra.

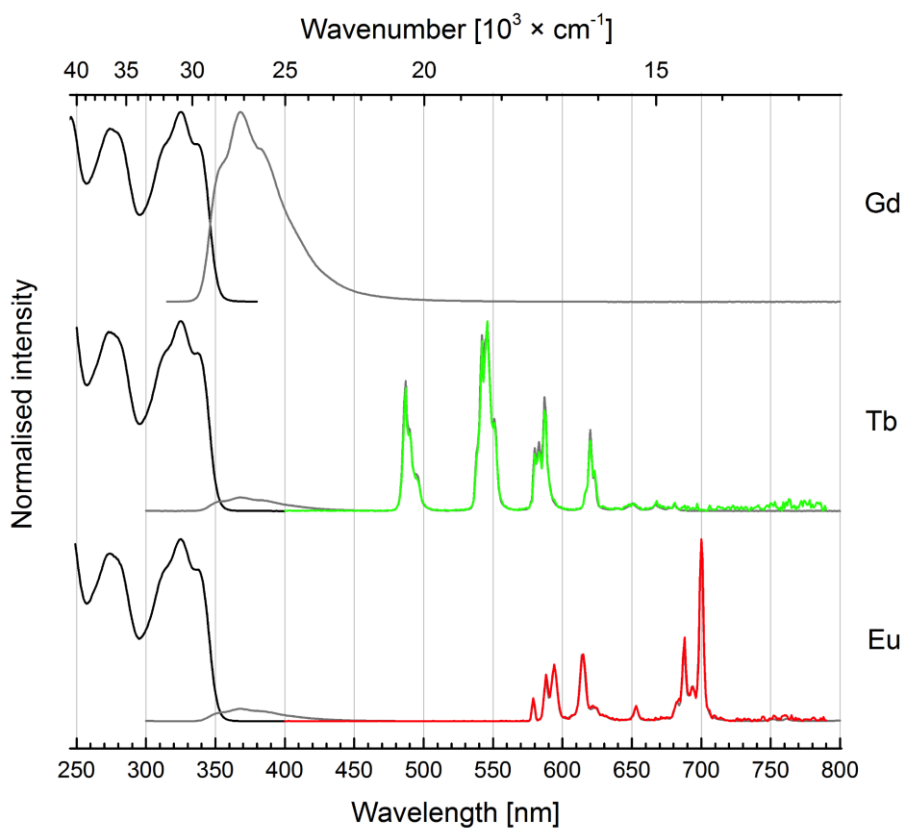

**Figure S10.** Excitation spectra of the Ln-centered emissions (Tb 545 nm, Eu 700 nm) and of the ligand centered emission (**Gd1d** 374 nm) at 298 K (black lines, left). Steady-state emission spectra of **Ln1d** at 298 K (grey lines, right) and time-resolved emission spectra showing the Ln-centered emissions (Tb (green), Eu (red), 298 K, coloured lines, right). Excitation at  $\lambda_{\text{ex}} = 336 \text{ nm}$ ; [**Ln1d**] = nominally  $3.0 \times 10^{-5} \text{ M}$ , PIPES-buffered aqueous solutions 0.01 M, pH 6.5.

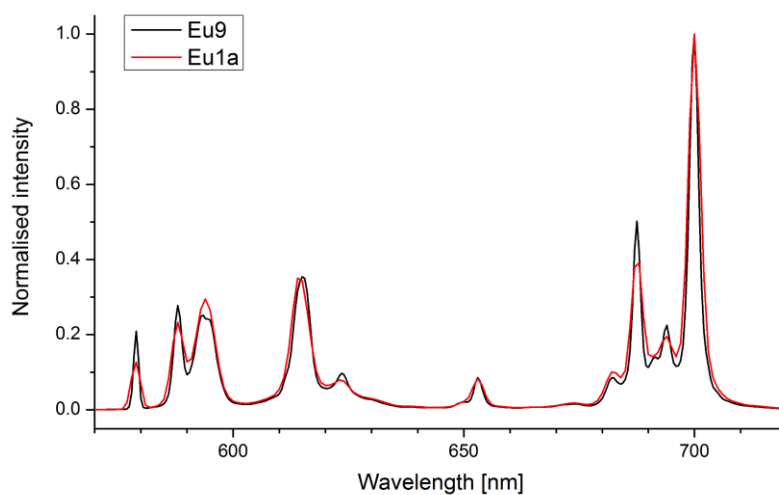

**Figure S11.** Overlaid emission spectra (normalised at 700 nm) of **Eu1a** and **Eu9**.

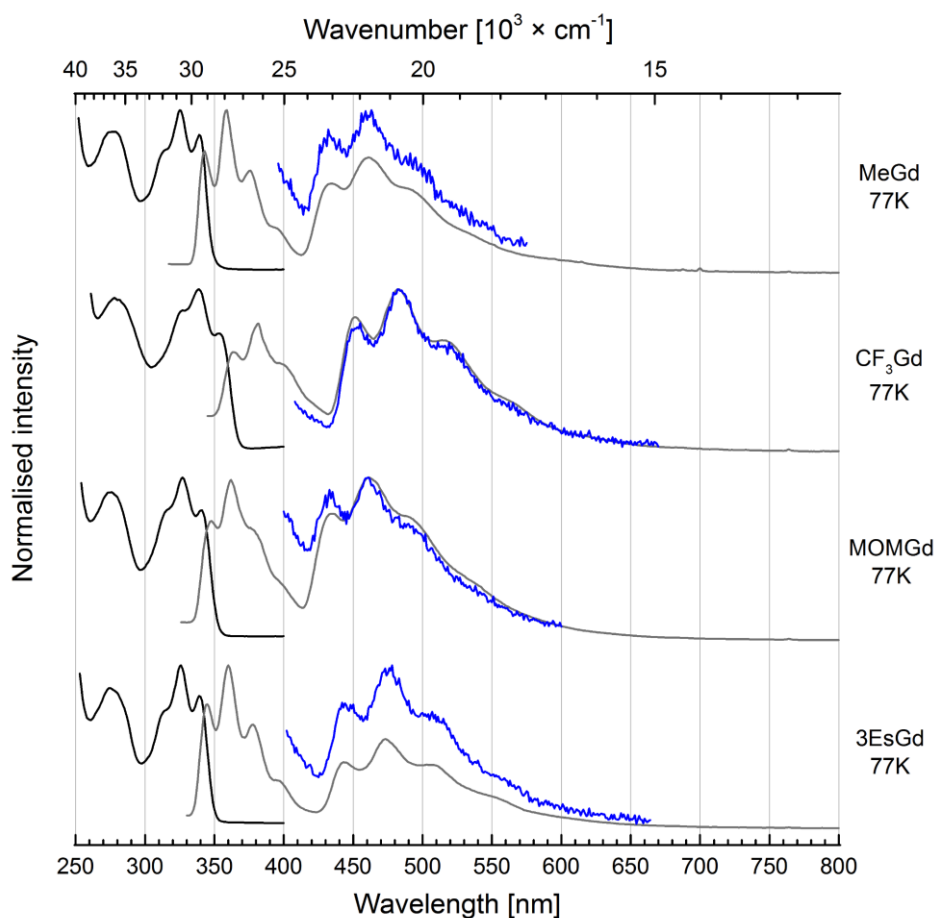

**Figure S12.** Excitation spectra of the ligand-centered phosphorescence (triplet state) emissions (**Gd1a** 461 nm, **Gd1b** 482 nm, **Gd1c** 461 nm, **Gd1d** 473 nm) at 77 K (black lines, left). Steady-state emission spectra (grey lines, right) and time-resolved emission spectra (blue lines, right) 40 ms delay after pulsed excitation at  $\lambda_{\text{max}}$  (lowest in energy) of the Gd complexes at 77 K with 10% glycerol added to 30  $\mu\text{M}$ , PIPES-buffered aqueous solutions 0.01 M, pH 6.5.

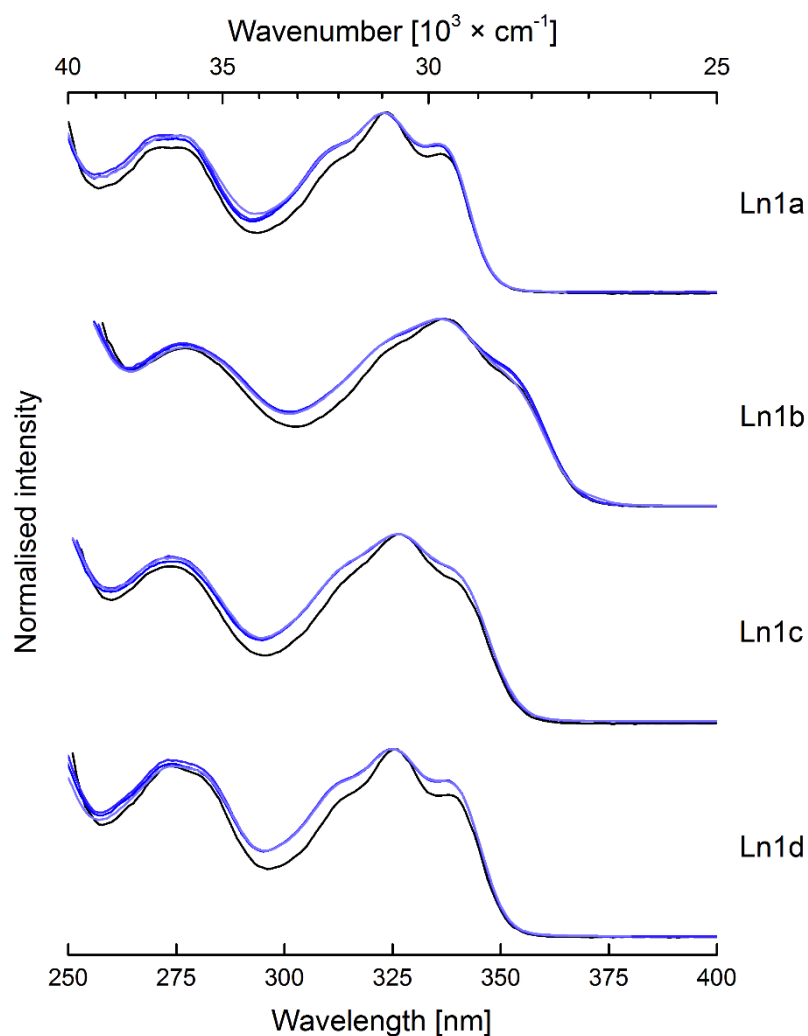

**Figure S13.** Overlaid absorption (black) and excitation spectra of all **Ln1a-d** complexes. Excitation spectra of the Ln-centered emissions (Tb 545 nm, Eu 700 nm) and of the ligand centered emission (380, 400, 425 and 395 nm for Gd1a-d, respectively), are shown in blue, [**Ln1a-d**] = nominally  $3.0 \times 10^{-5}$  M, PIPES-buffered aqueous solutions 0.01 M, pH 6.5.

## Synthetic procedures and characterization data

### DKS57\_042B

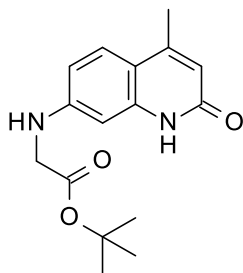

Formula Weight : 288,34(1)

Exact Mass : 288,14739

Formula :  $C_{16}H_{20}N_2O_3$

Composition : C 66,65% H 6,99% N 9,72% O 16,65%

C:\Xcalibur\...DKS57\_042B\_pure\_1090

1/22/2018 5:32:02 PM

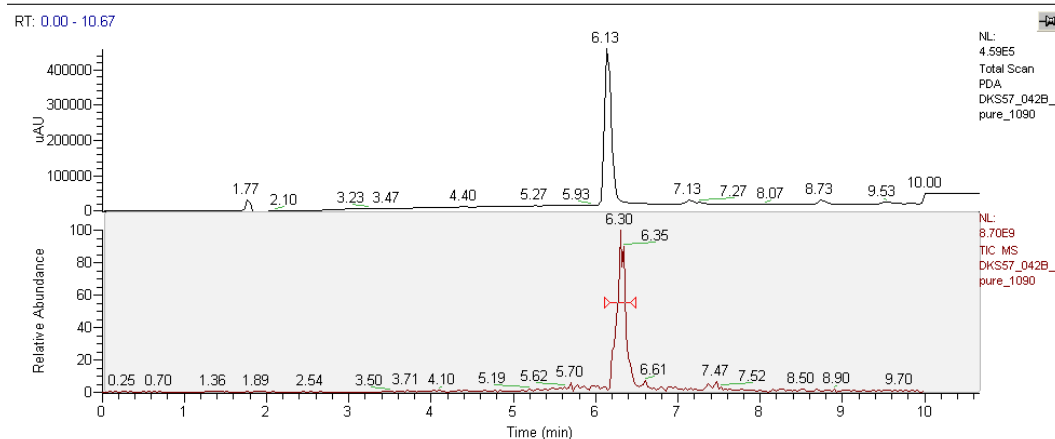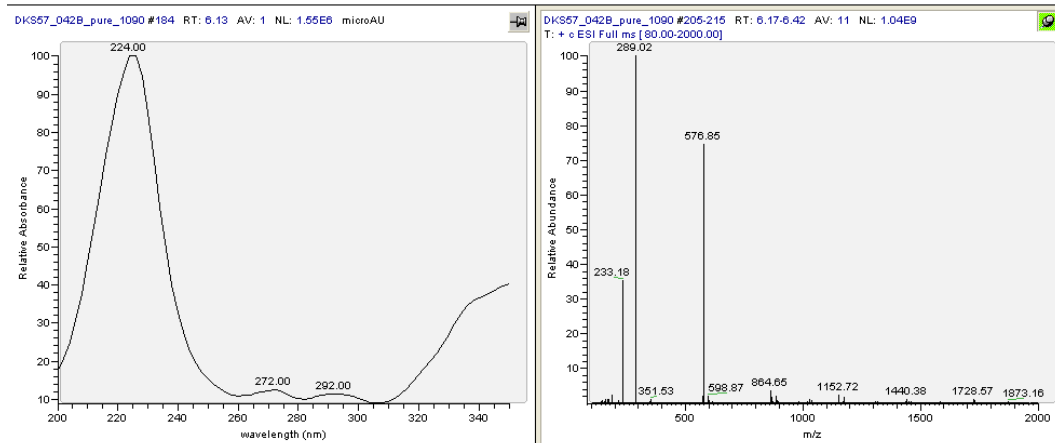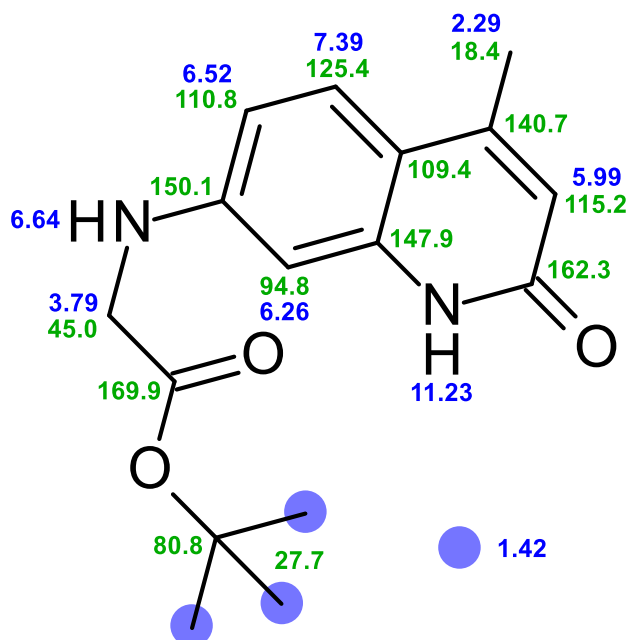

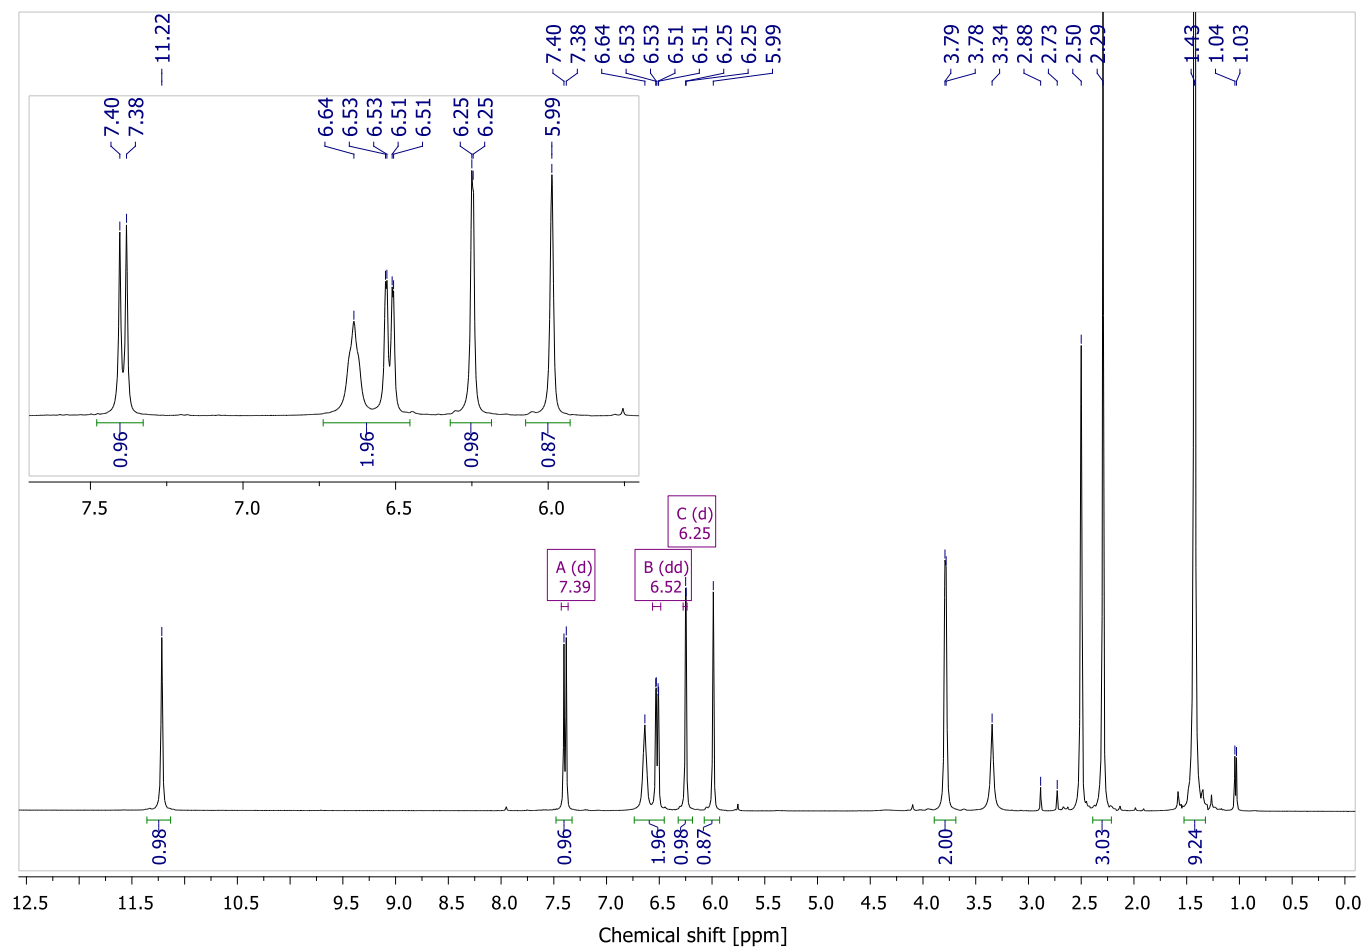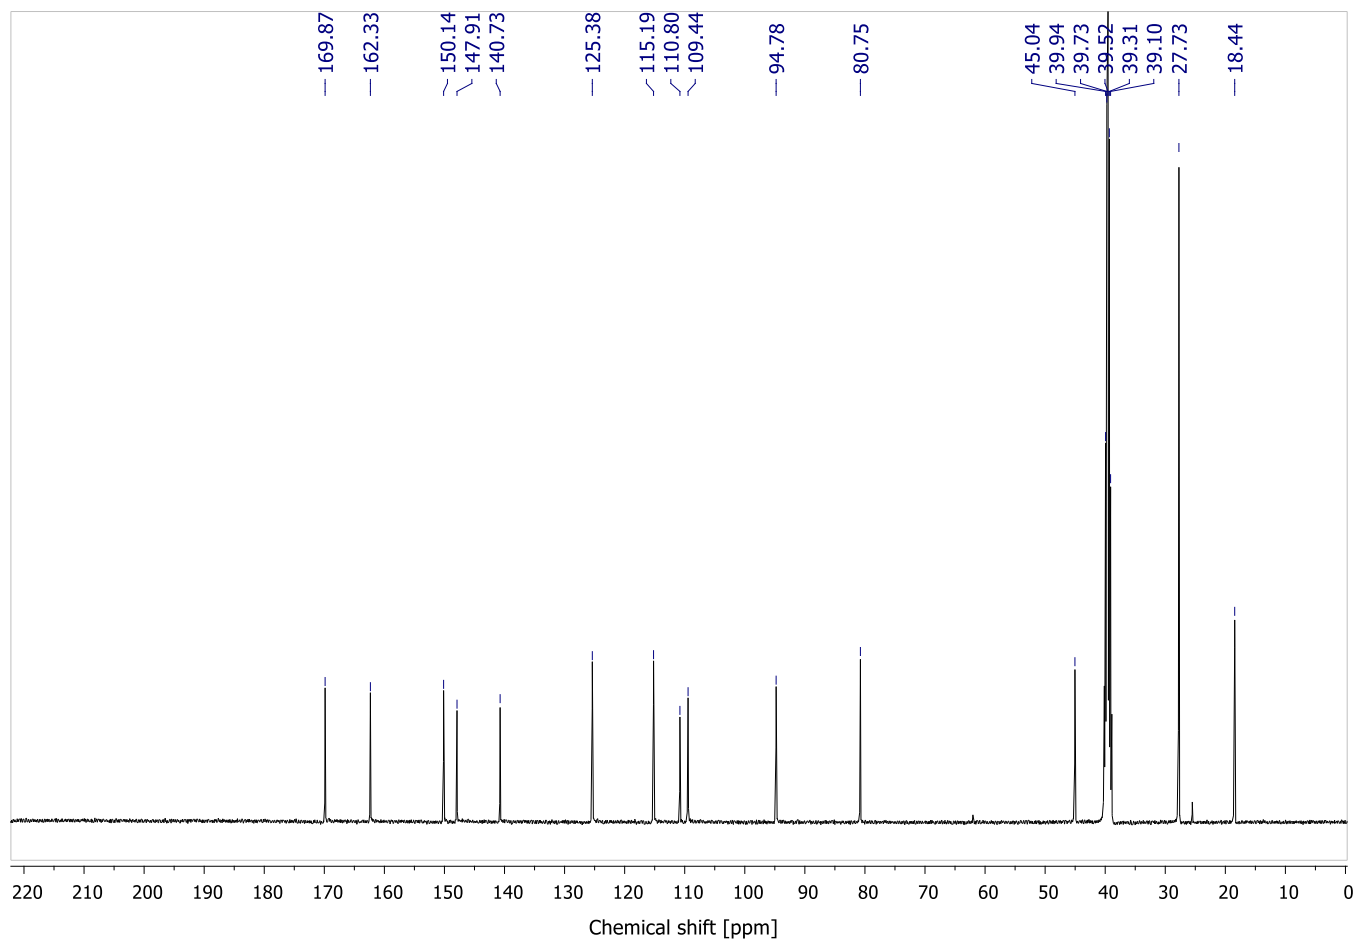

DKS57\_028A

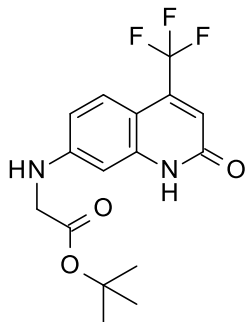

Formula Weight : 342,31(1)

Exact Mass : 342,11913

Formula : C<sub>16</sub>H<sub>17</sub>F<sub>3</sub>N<sub>2</sub>O<sub>3</sub>

Composition : C 56,14% H 5,01% N 8,18% O 14,02% F 16,65%

(Note: t<sub>R</sub>: 5.90 min is some sort of solvent absorption below 240 nm)

C:\xcalibur\...DPS58\_013A\_1090

1/22/2018 5:43:00 PM

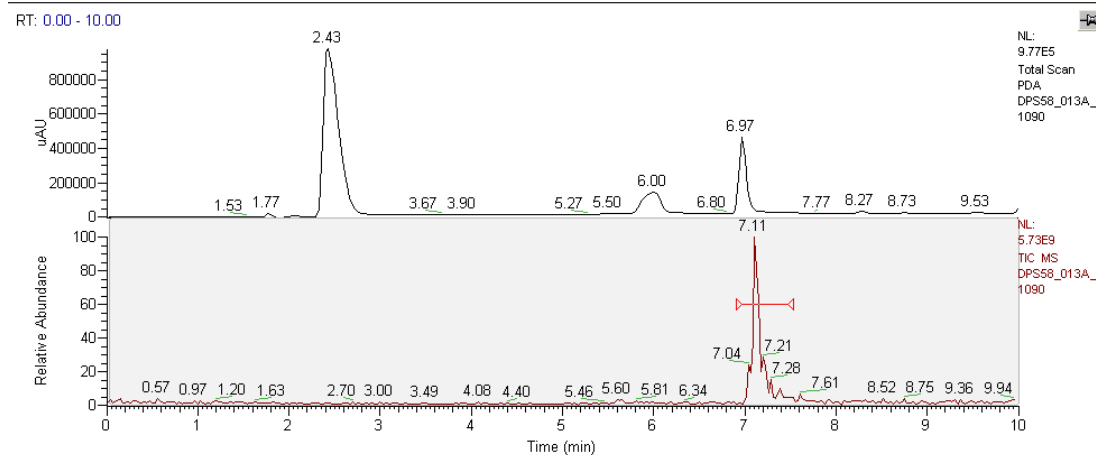

DPS58\_013A\_1090 #209 RT: 6.97 AV: 1 NL: 1.82E6 microAU

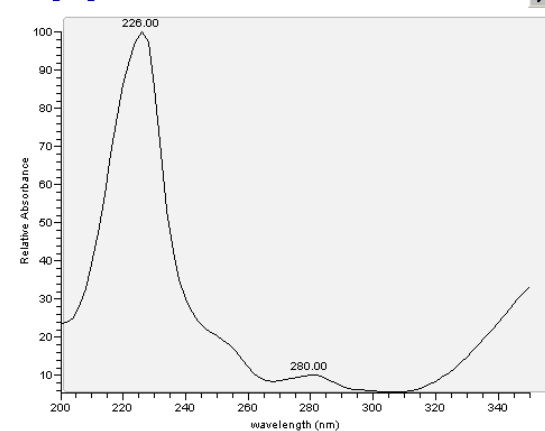

DPS58\_013A\_1090 #234-253 RT: 6.98-7.47 AV: 20 NL: 4.90E8

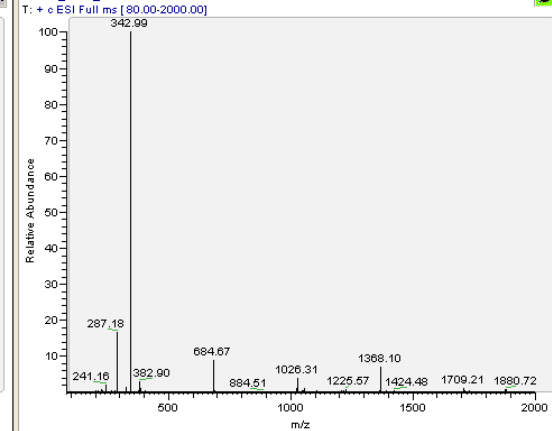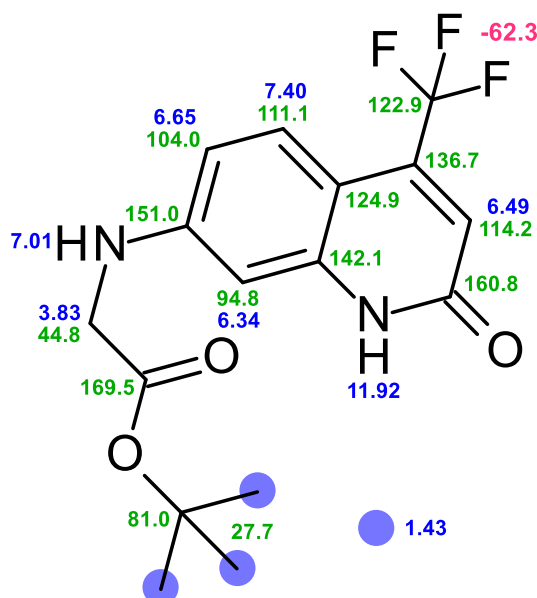



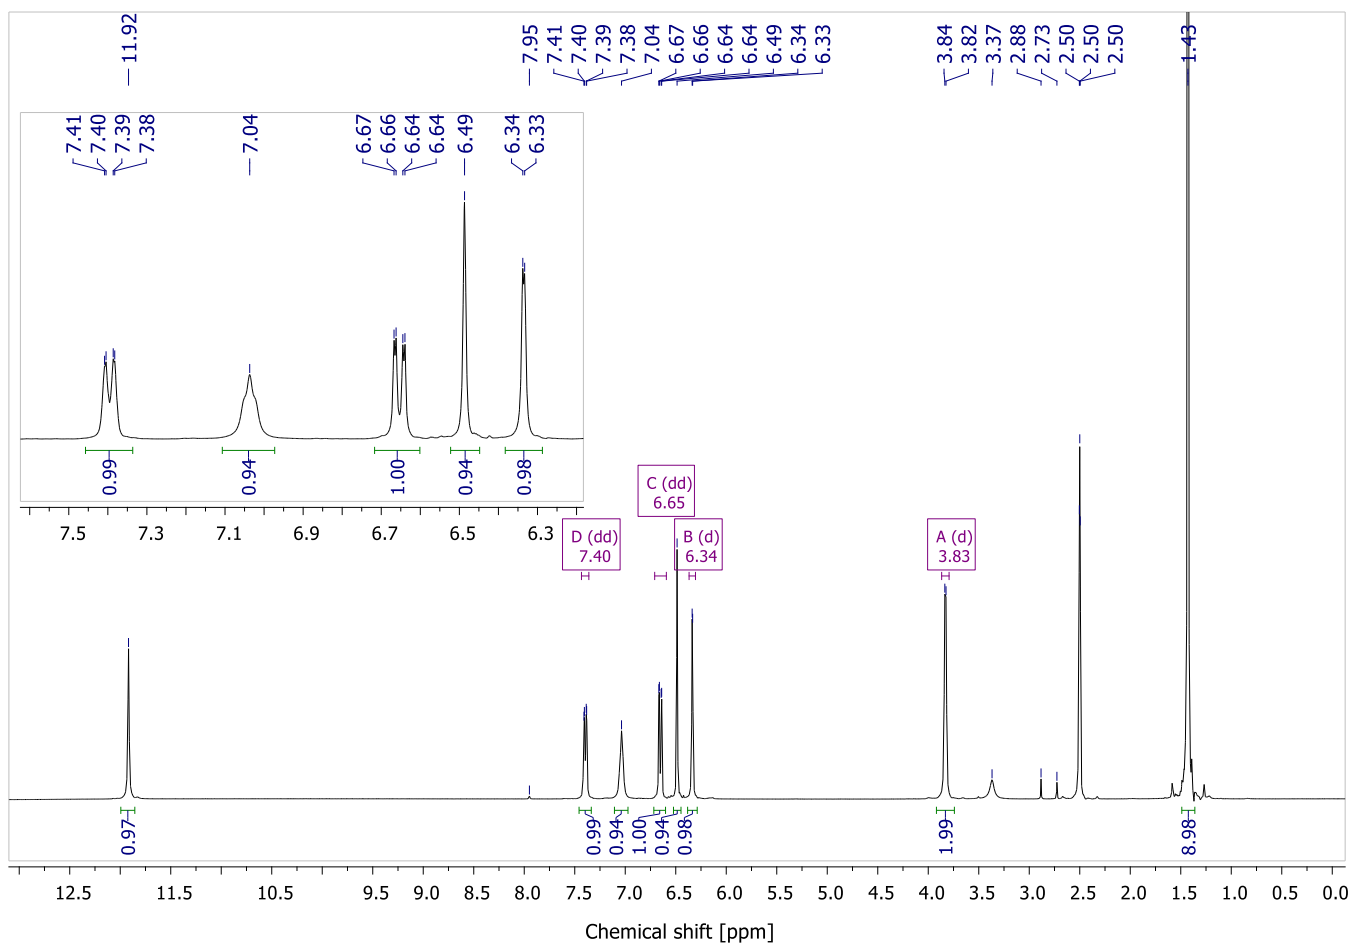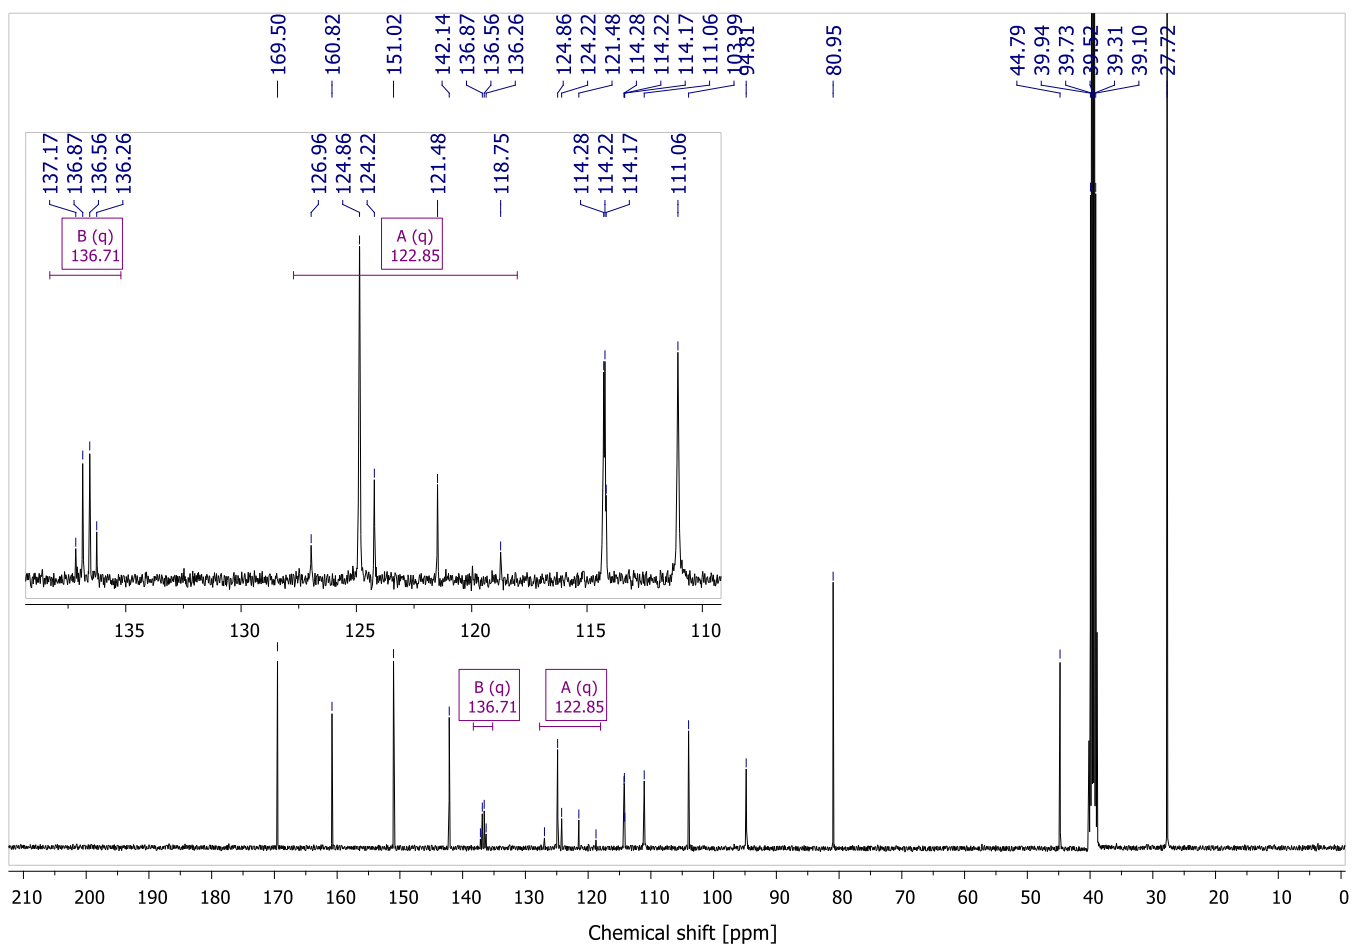

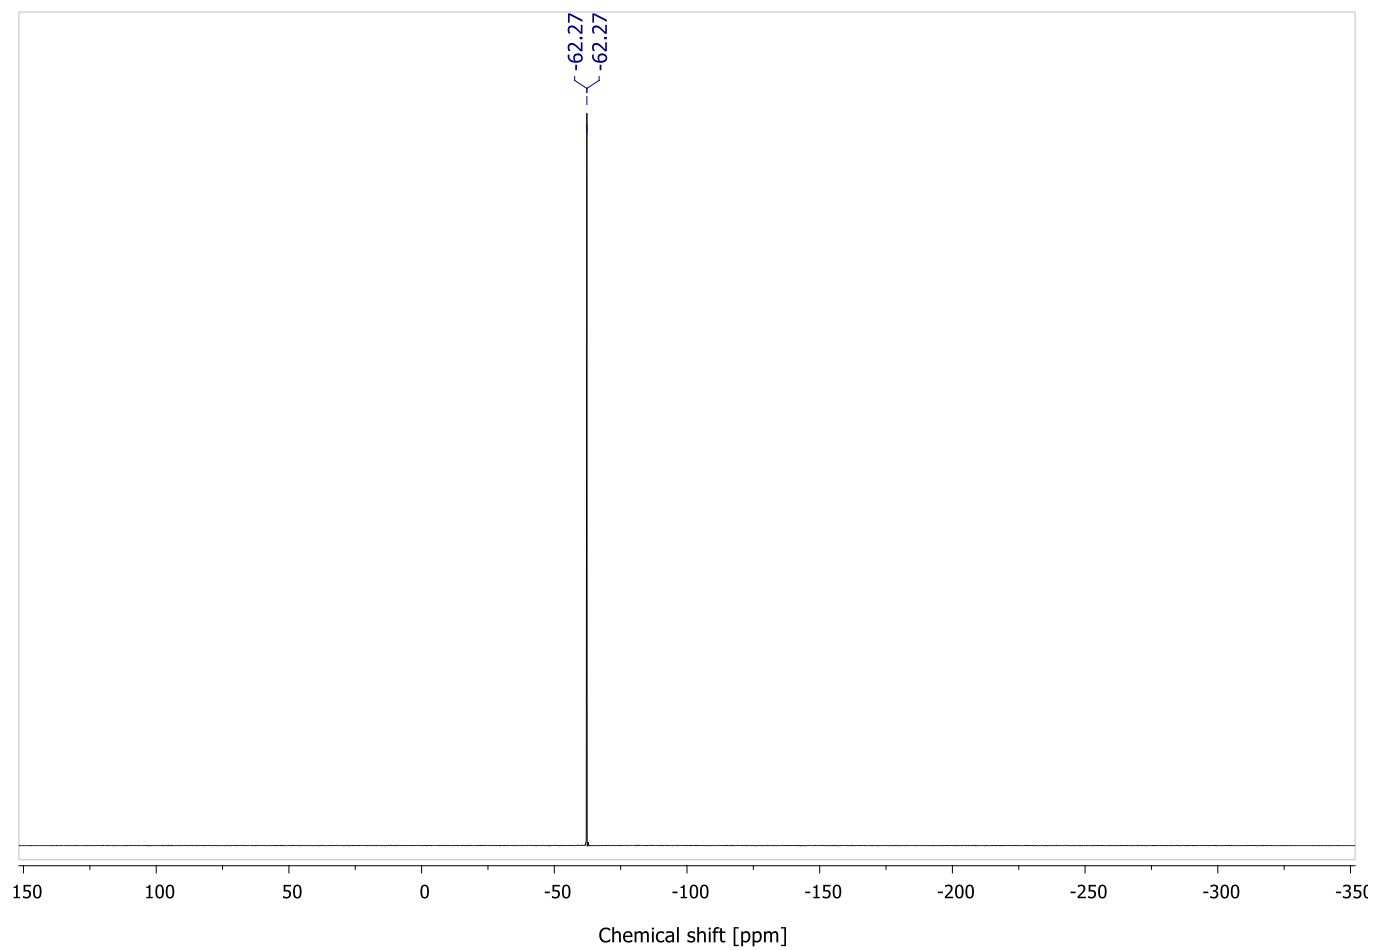

# DPS58\_006A

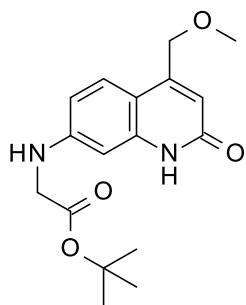

Formula Weight : 318,37(1)

Exact Mass : 318,15796

Formula : C<sub>17</sub>H<sub>22</sub>N<sub>2</sub>O<sub>4</sub>

Composition : C 64,13% H 6,97% N 8,80% O 20,10%

C:\Vcalibur\...DPS58\_006A\_1090

1/9/2018 10:19:45 PM

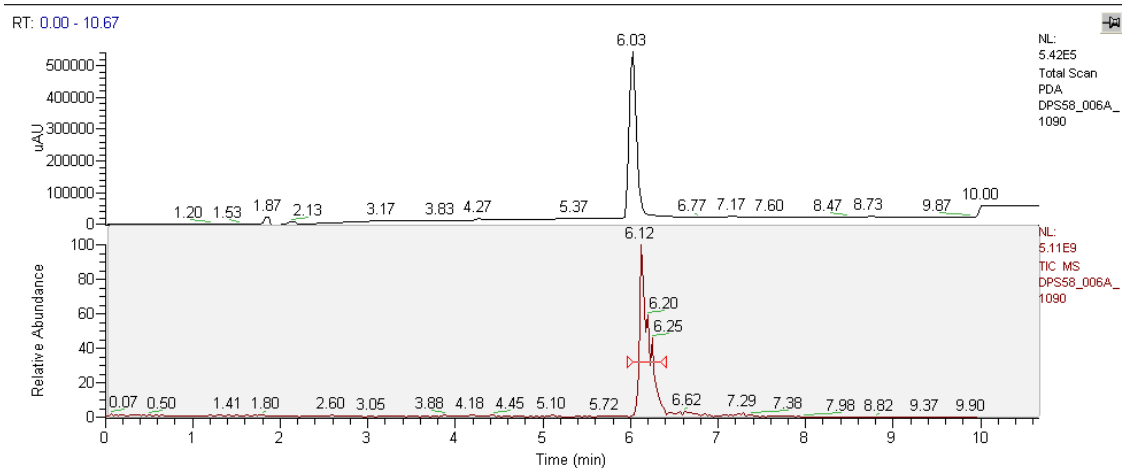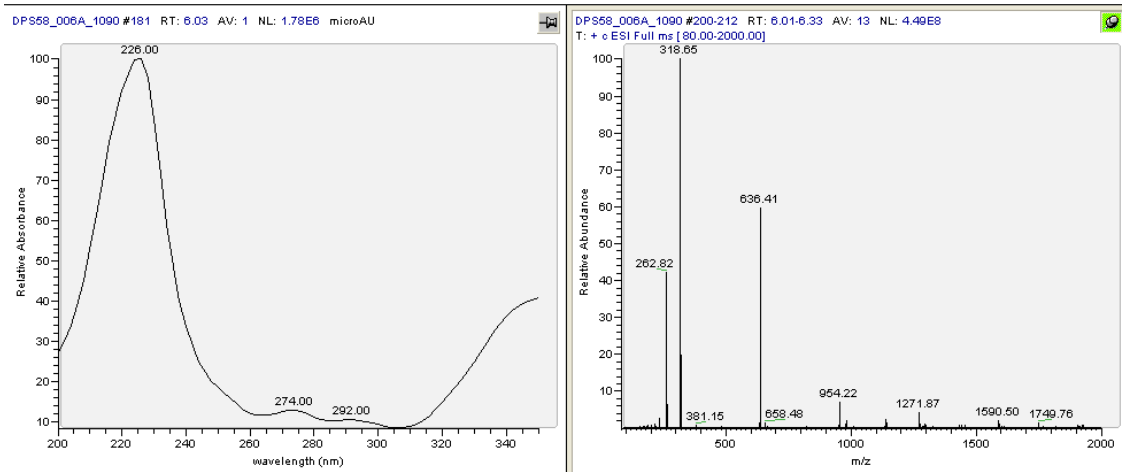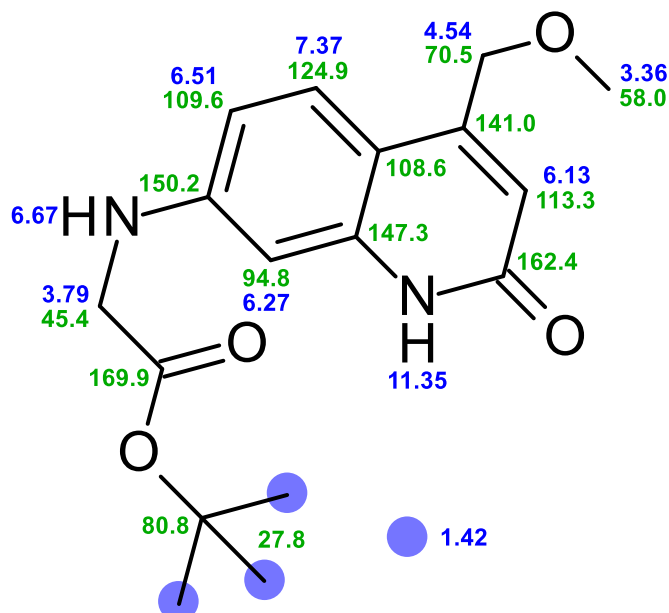

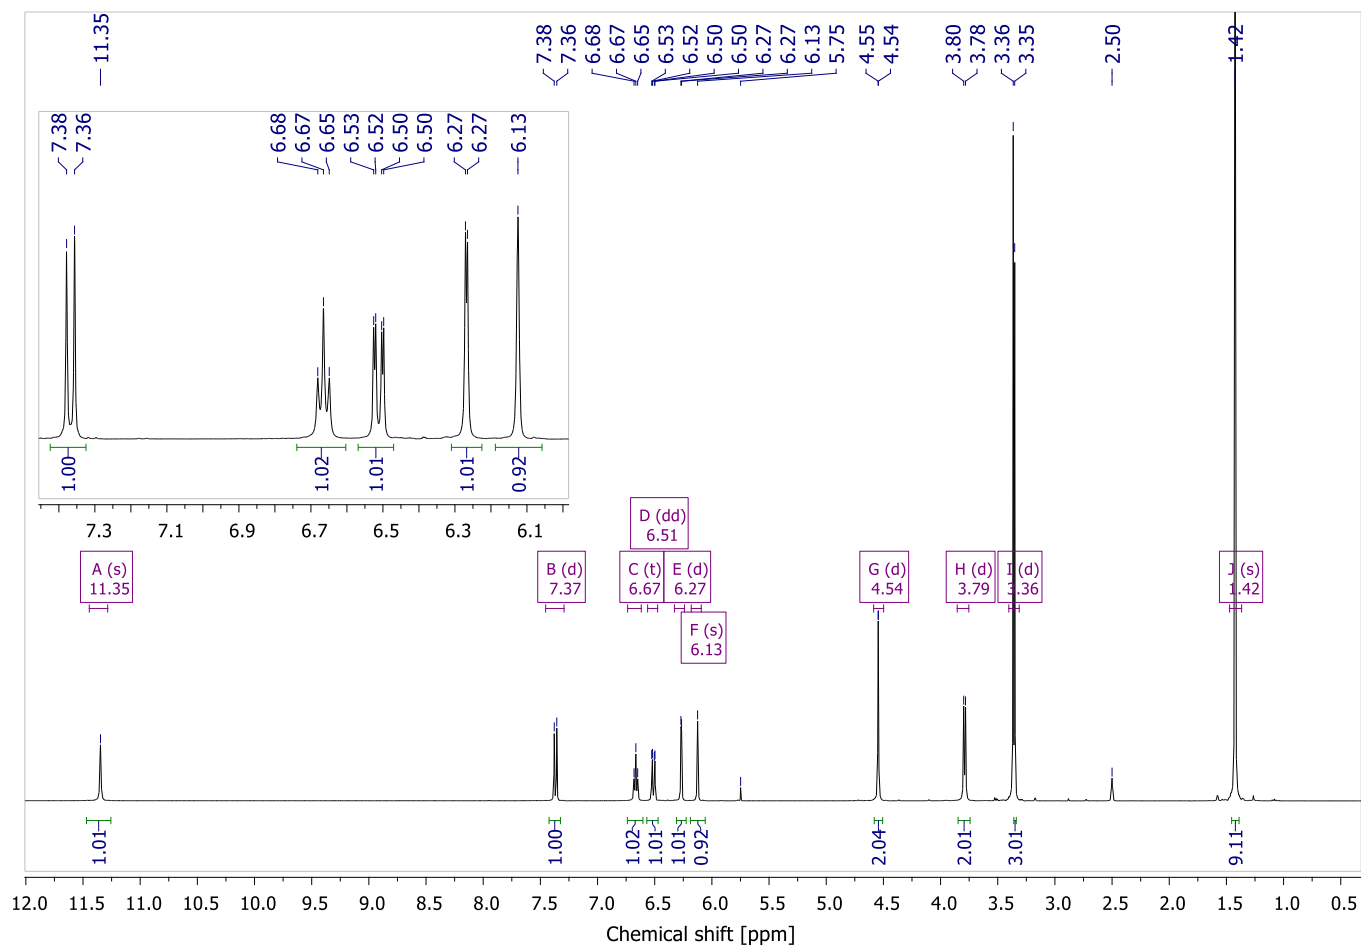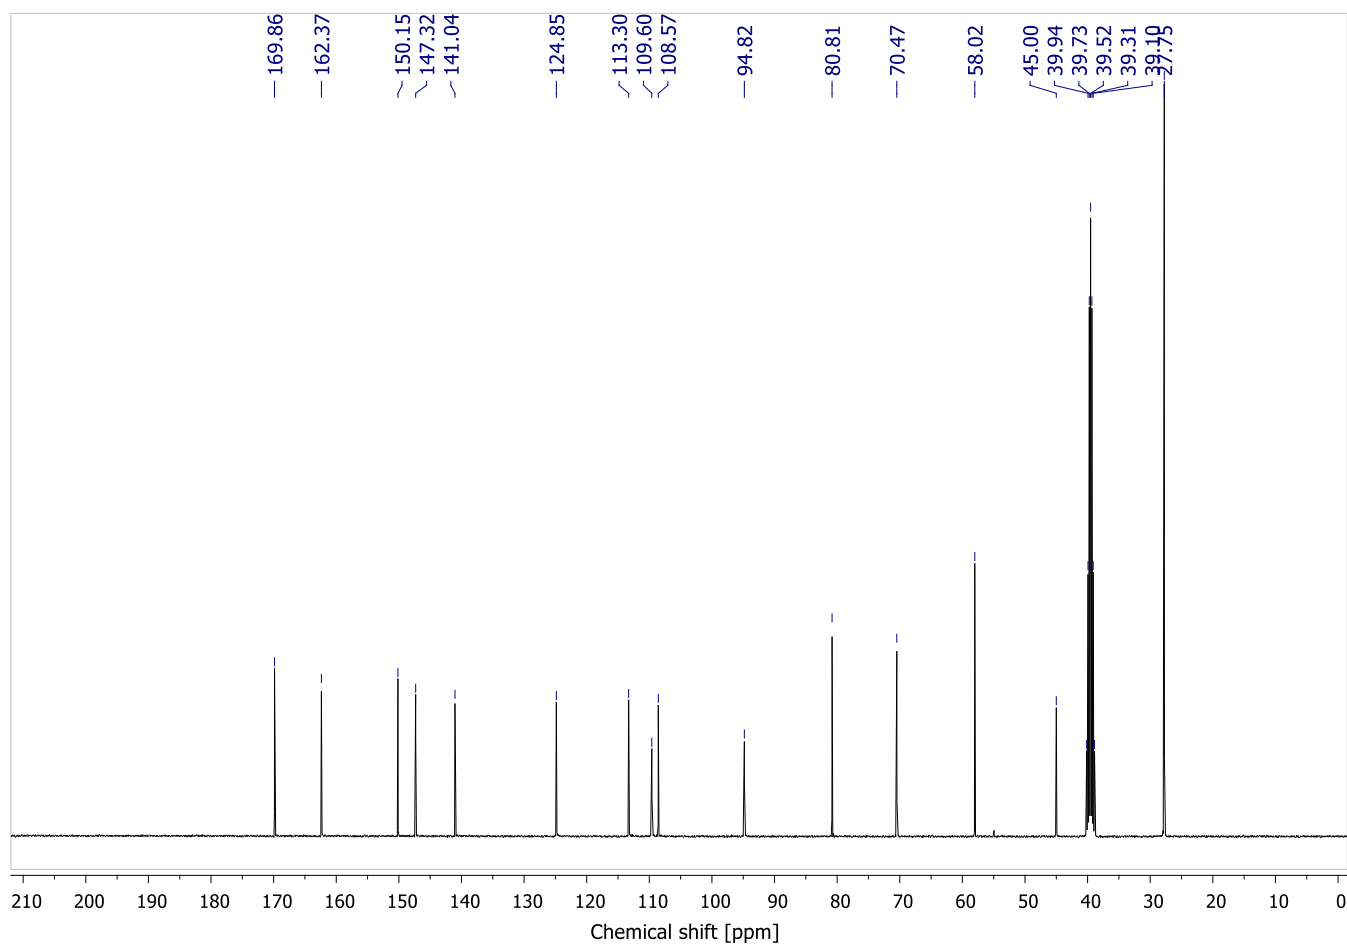

# DPS58\_009A

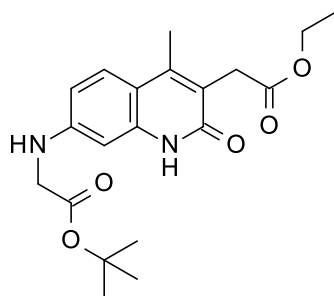

Formula Weight : 374,43(2)

Exact Mass : 374,18417

Formula : C<sub>20</sub>H<sub>26</sub>N<sub>2</sub>O<sub>5</sub>

Composition : C 64,15% H 7,00% N 7,48% O 21,36%

DPS58\_009A\_2monthsair\_1090

1/9/2018 3:09:07 PM

RT: 0.00 - 10.00

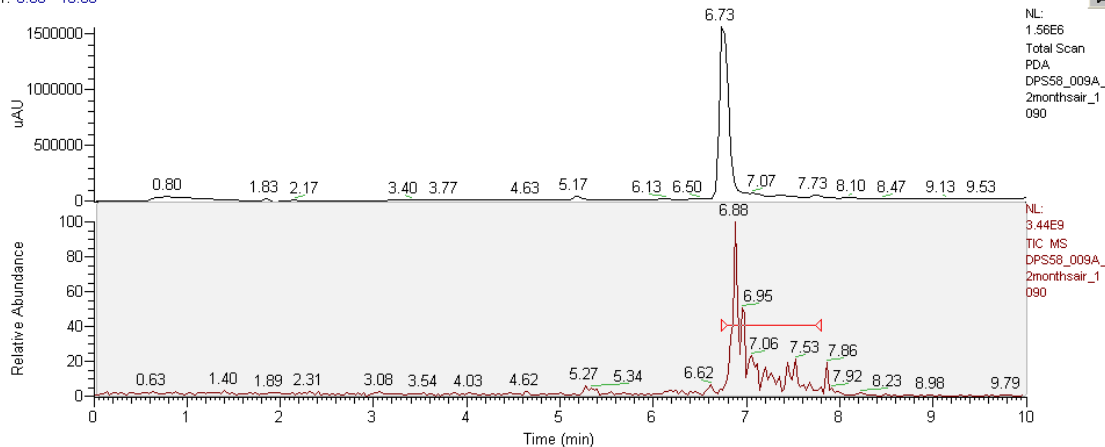

DPS58\_009A\_2monthsair\_1090 #202 RT: 6.73 AV: 1 NL: 2.61E6 microAU

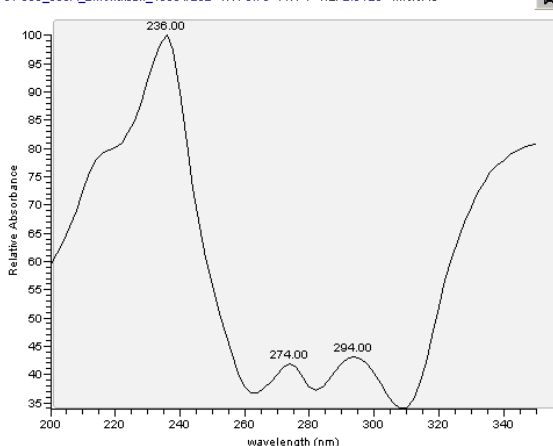

DPS58\_009A\_2monthsair\_1090 #221-255 RT: 6.78-7.73 AV: 35 NL: 1.34E8 T: + c ESI Full ms [ 80.00-2000.00]

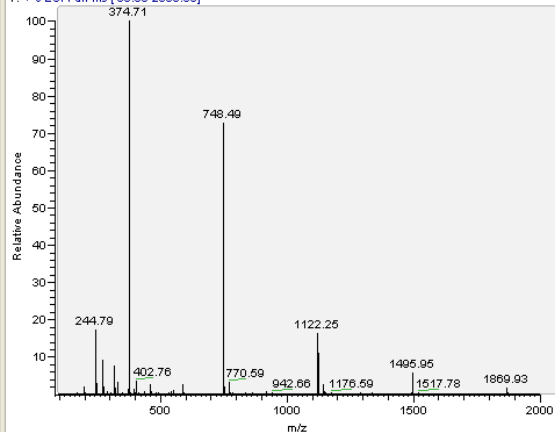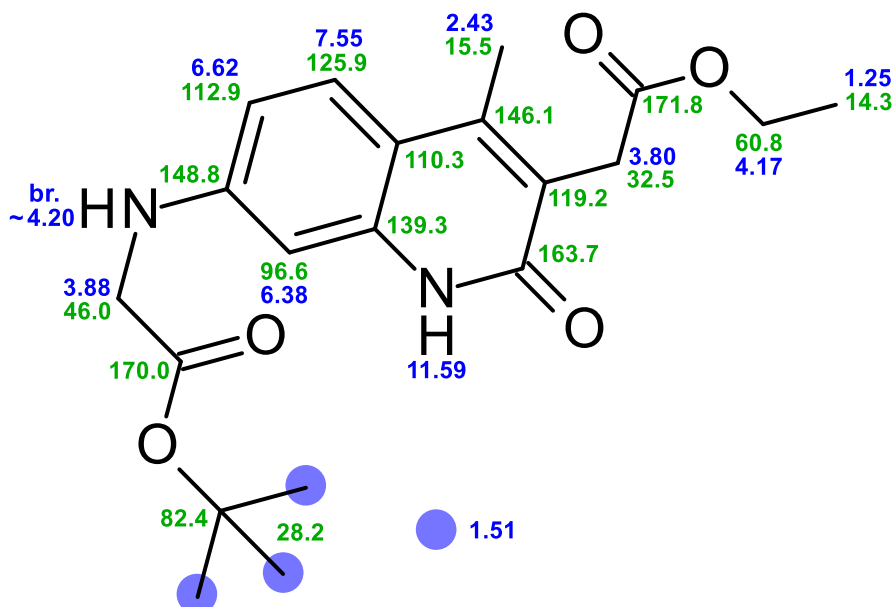

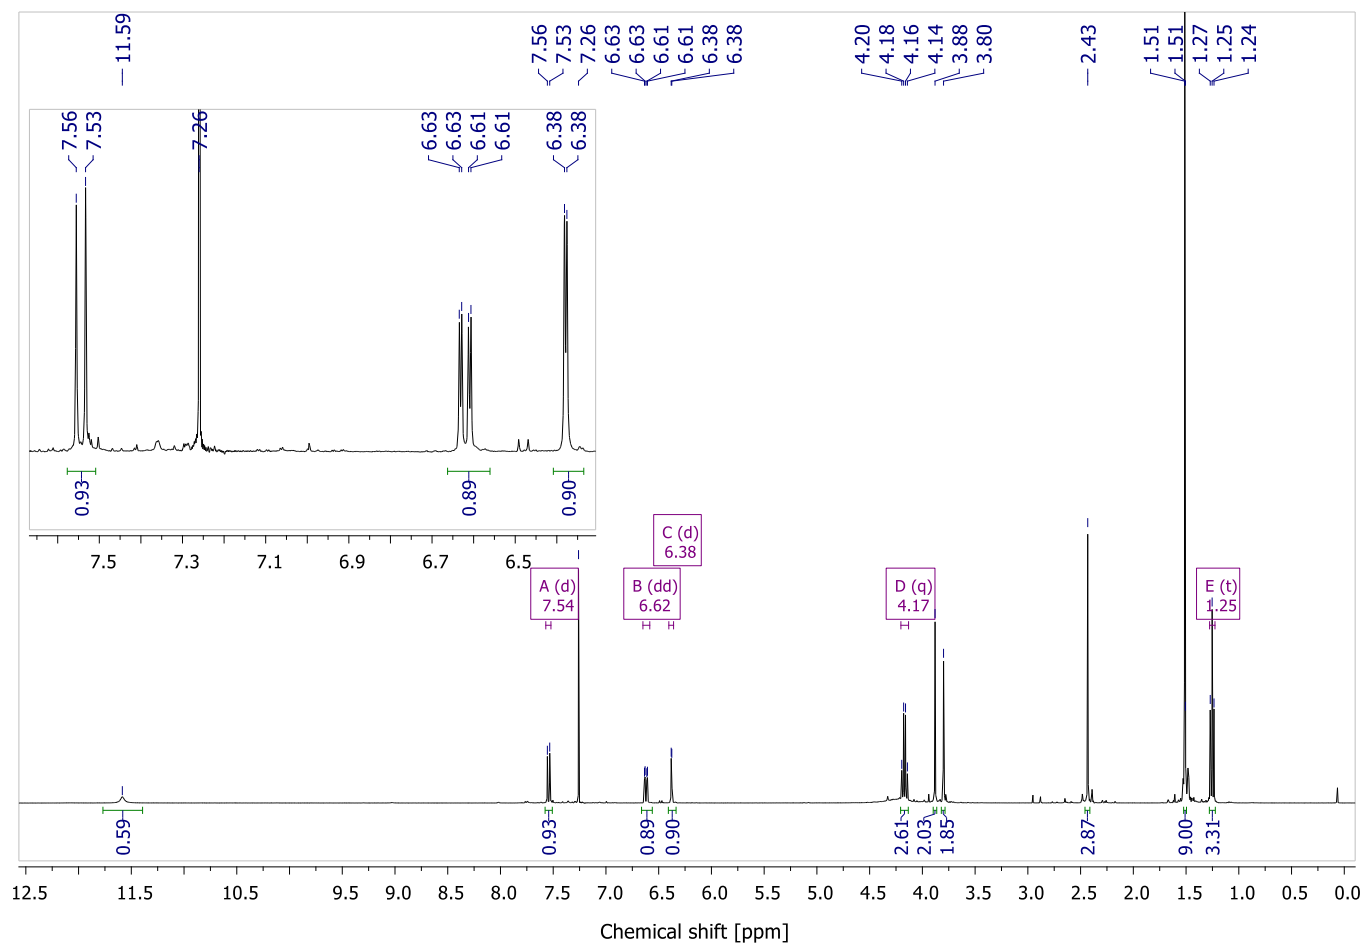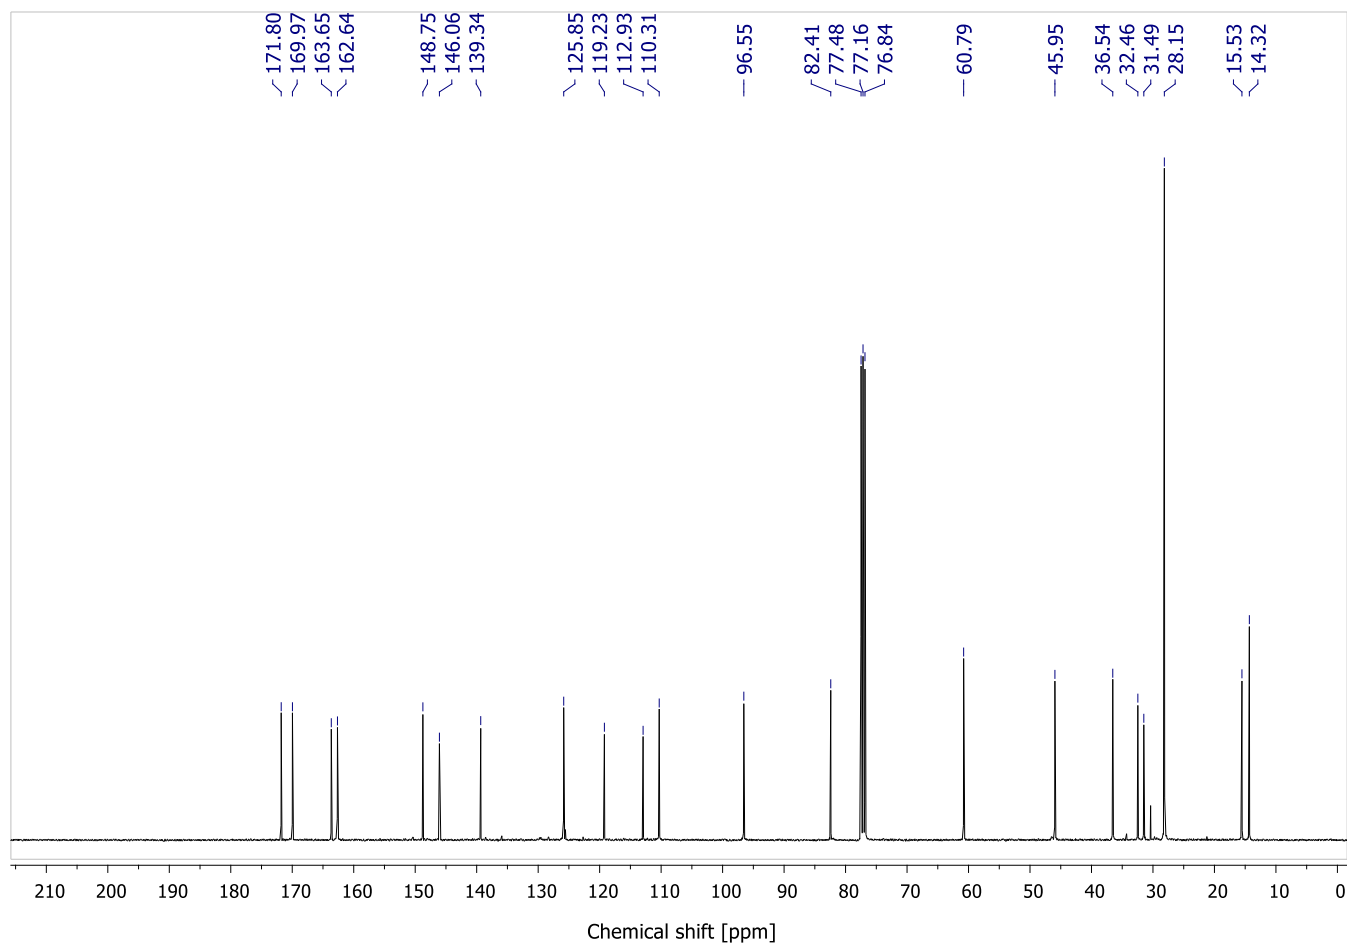

# DKS57\_058A

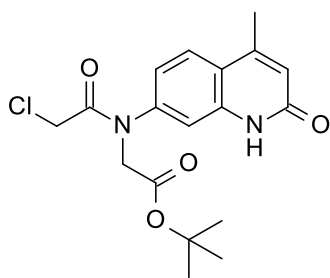

Formula Weight : 364,82(1)

Exact Mass : 364,11898

Formula : C<sub>18</sub>H<sub>21</sub>ClN<sub>2</sub>O<sub>4</sub>

Composition : C 59,26% H 5,80% N 7,68% O 17,54% Cl 9,72%

C:\Xcalibur\...DKS57\_058A\_pure\_1090\_5um

2/7/2018 11:58:27 AM

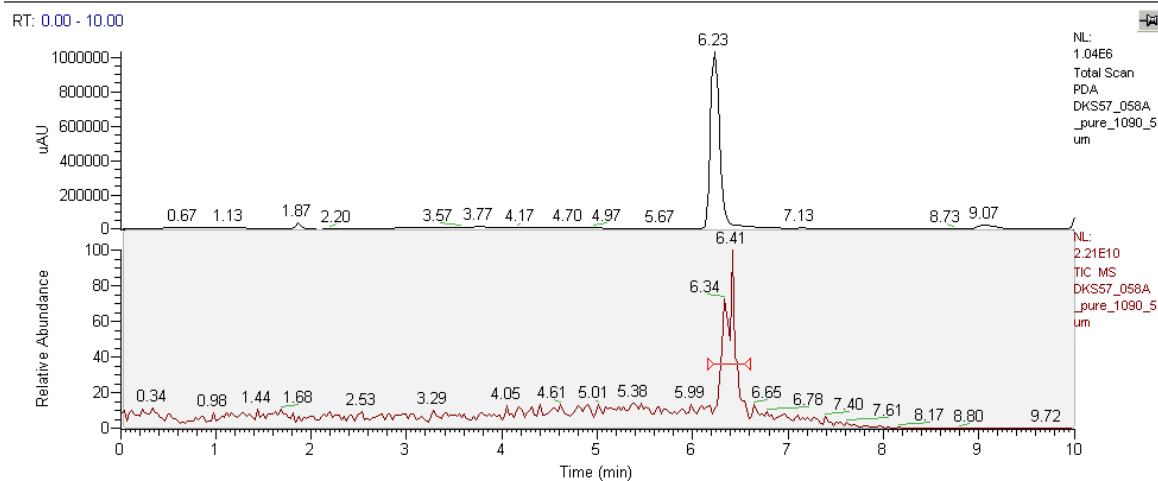

DKS57\_058A\_pure\_1090\_5um #187 RT: 6.23 AV: 1 NL: 2.49E6 microAU

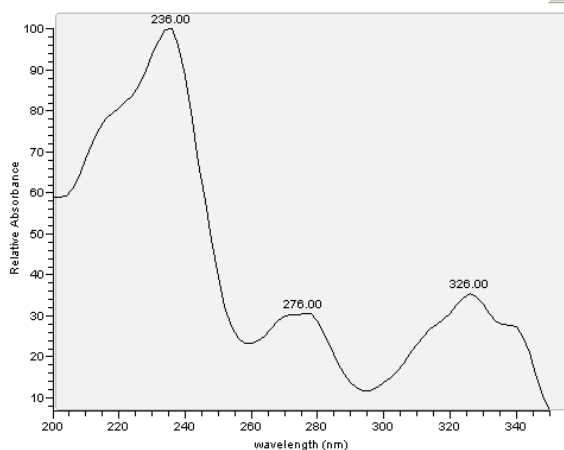

DKS57\_058A\_pure\_1090\_5um #233-246 RT: 6.20-6.54 AV: 14 NL: 3.30E8  
T: + c ESI Full ms [80.00-2000.00]

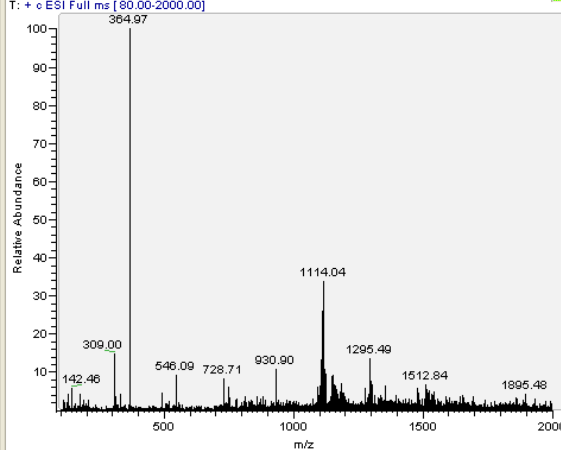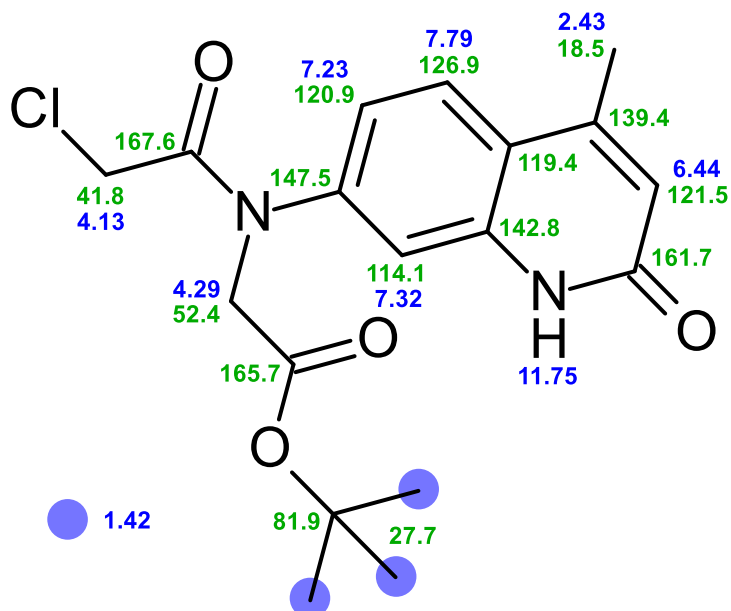

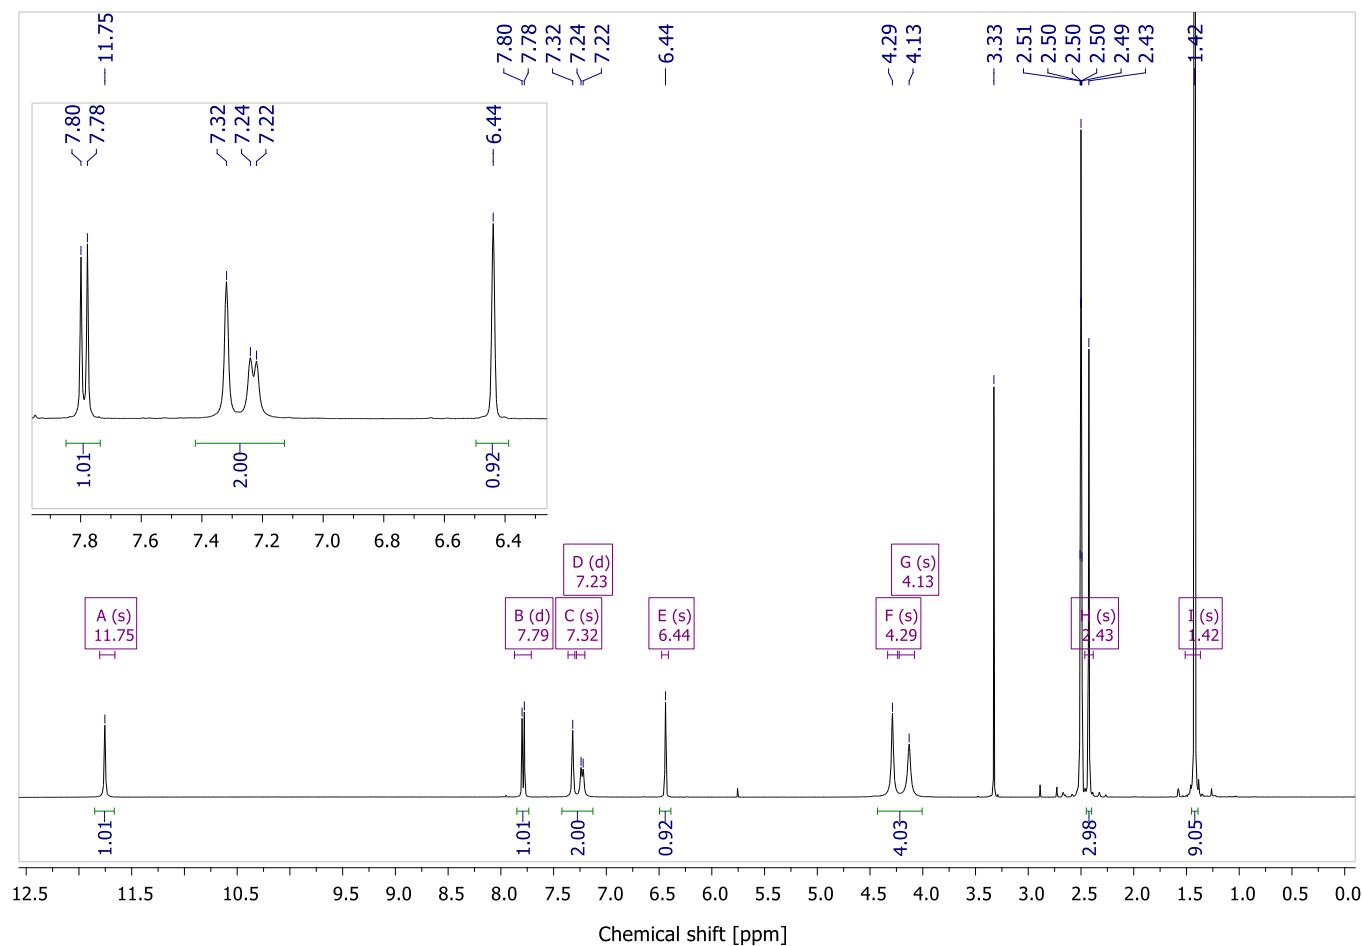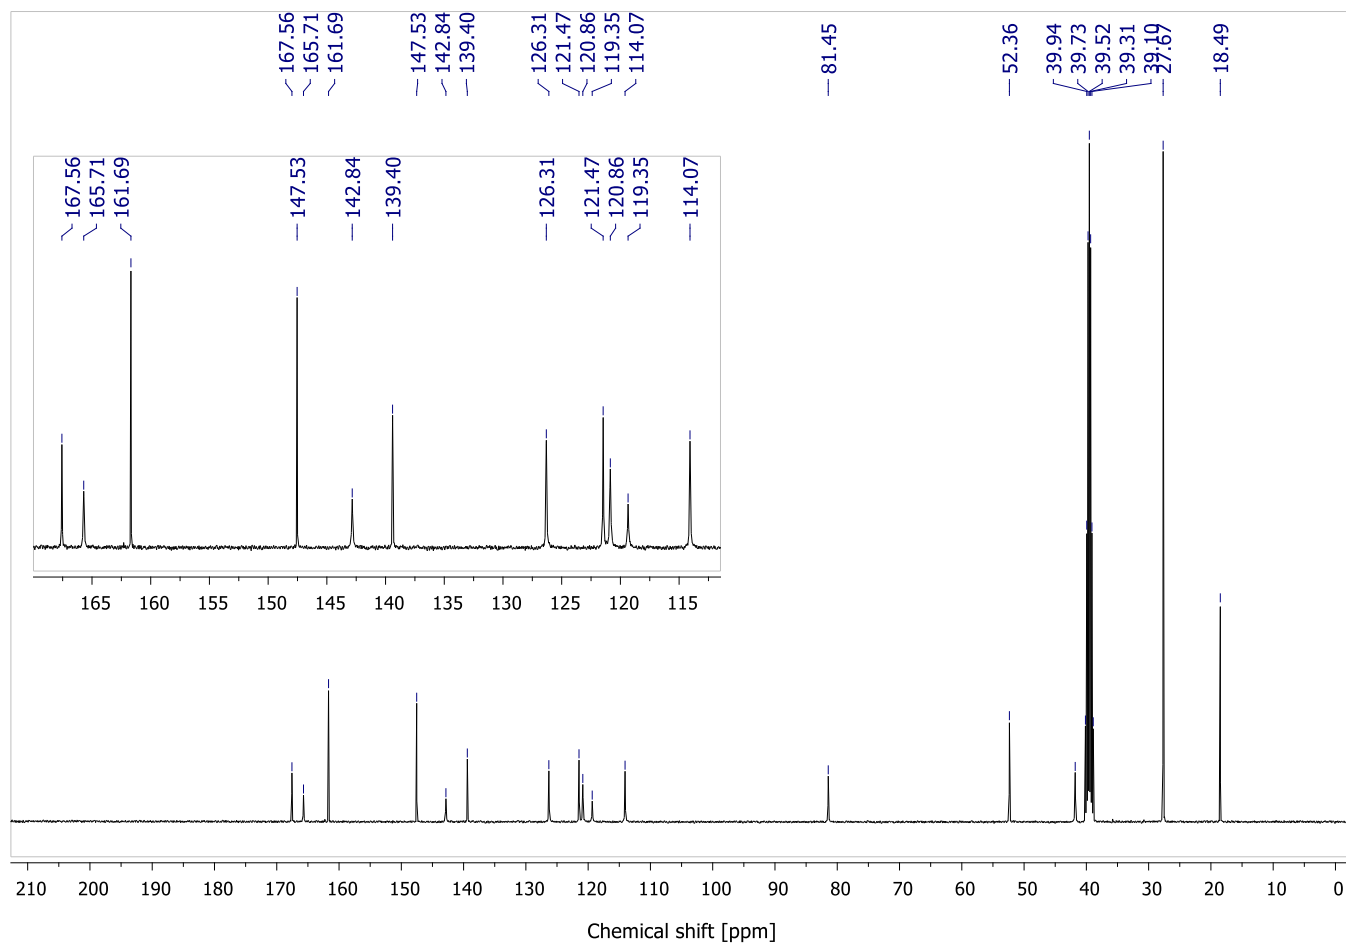



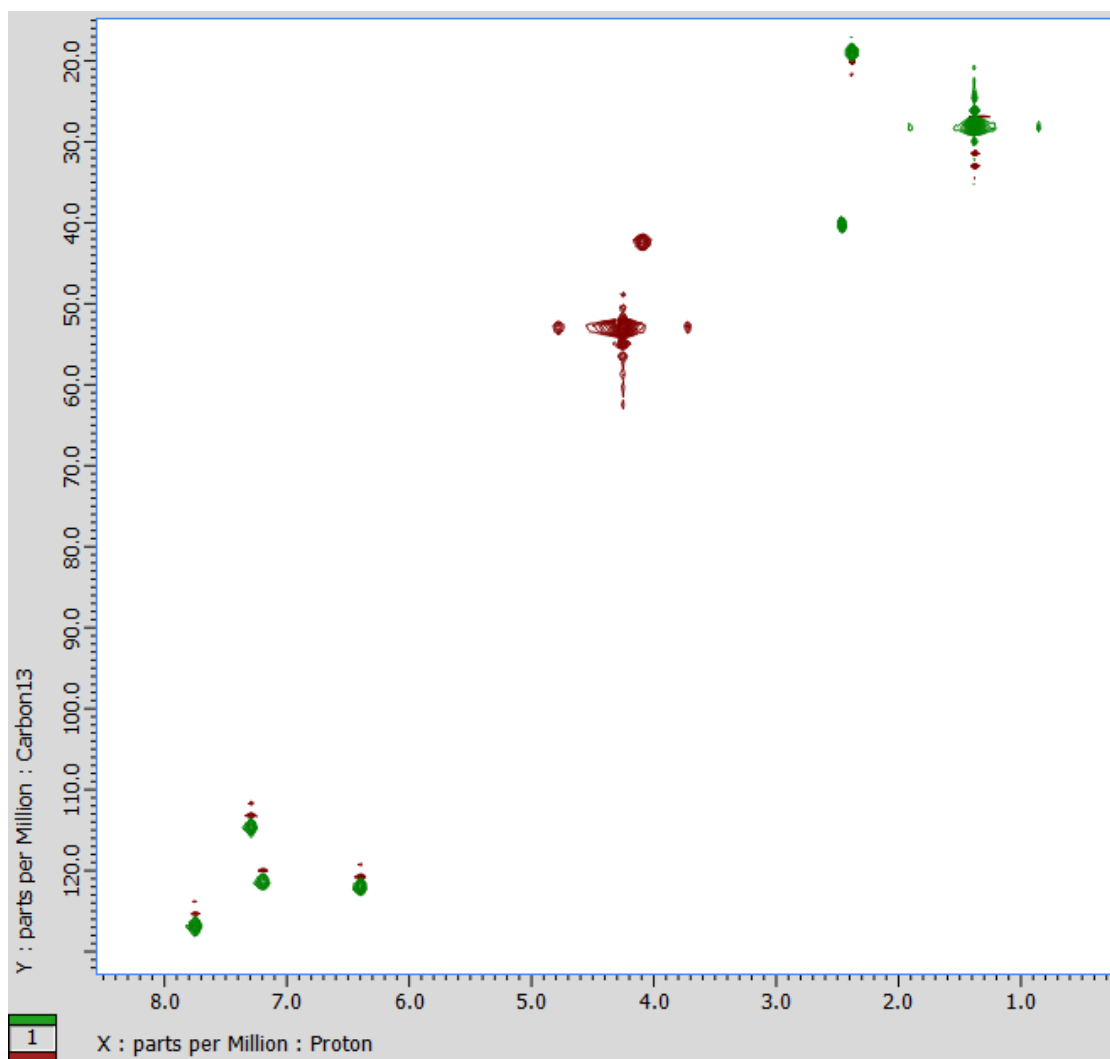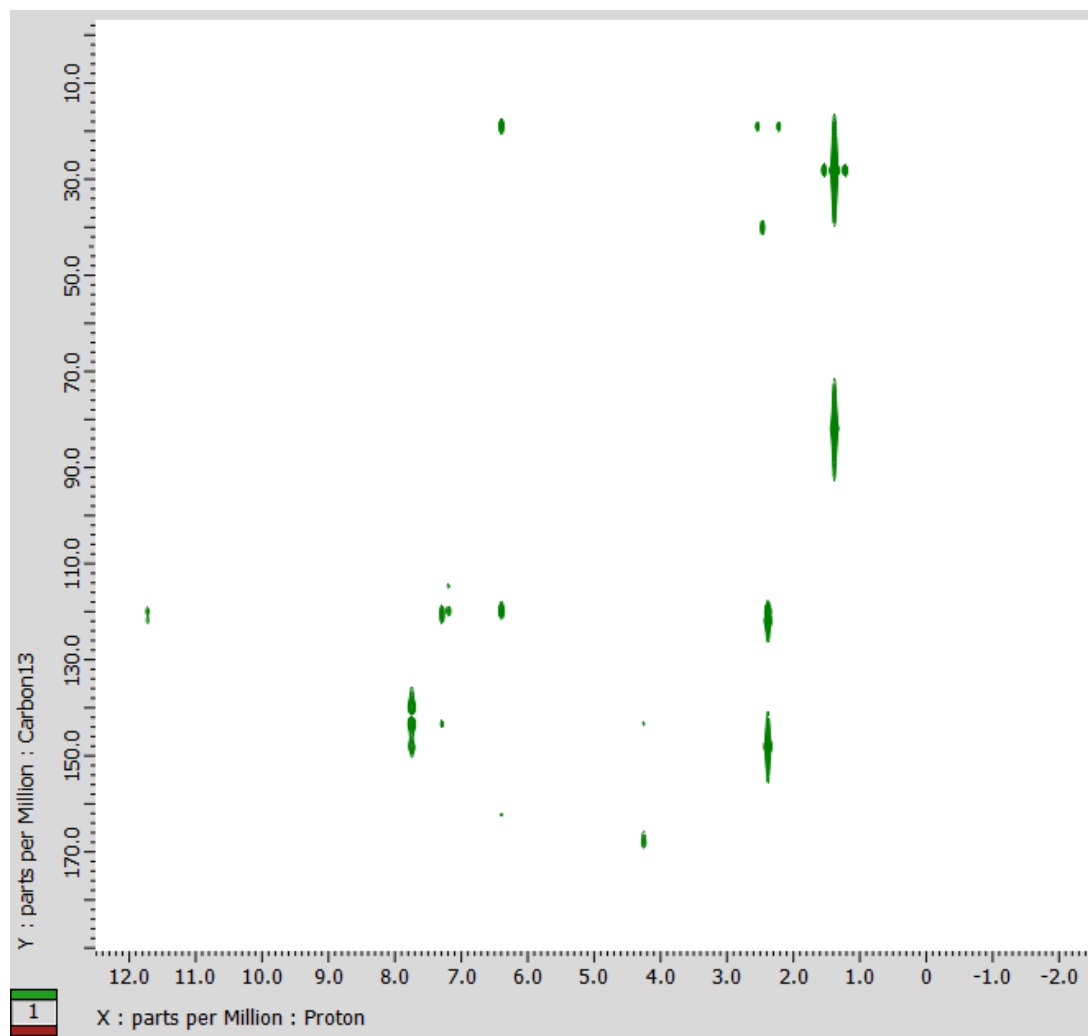

# DKS57\_061A

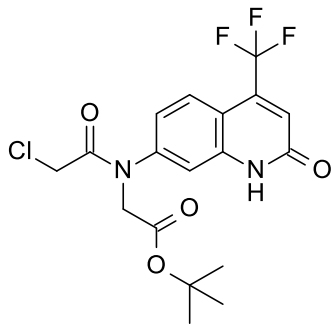

Formula Weight : 418,79(1)

Exact Mass : 418,09072

Formula : C<sub>18</sub>H<sub>18</sub>ClF<sub>3</sub>N<sub>2</sub>O<sub>4</sub>

Composition : C 51,62% H 4,33% N 6,69% O 15,28%

Cl 8,47% F 13,61%

C:\Xcalibur\...DKS57\_061A\_1090\_5um

2/7/2018 12:20:44 PM

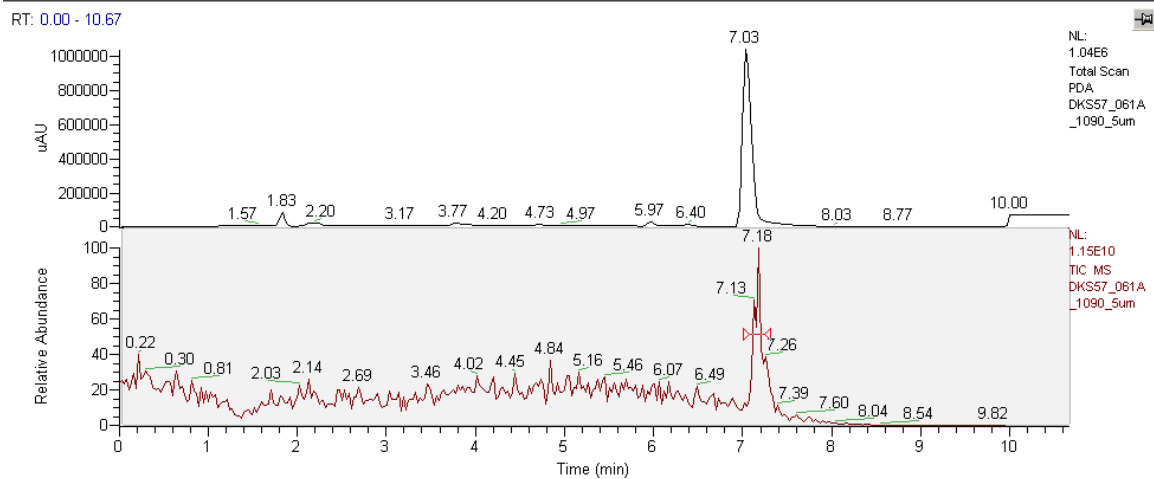

DKS57\_061A\_1090\_5um #211 RT: 7.03 AV: 1 NL: 2.46E6 microAU

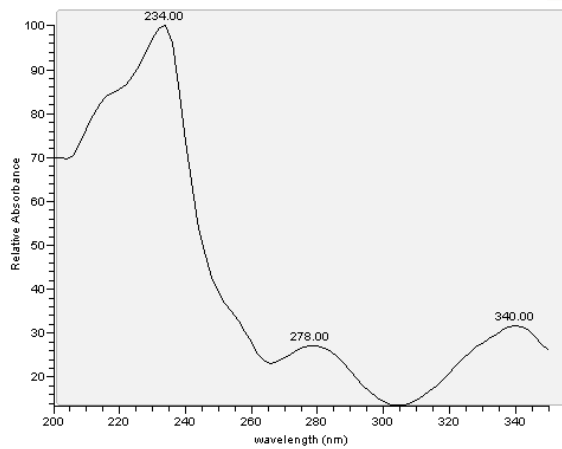

DKS57\_061A\_1090\_5um #266-272 RT: 7.08-7.24 AV: 7 NL: 1.40E8  
T: + c ESI Full ms [ 80.00-2000.00]

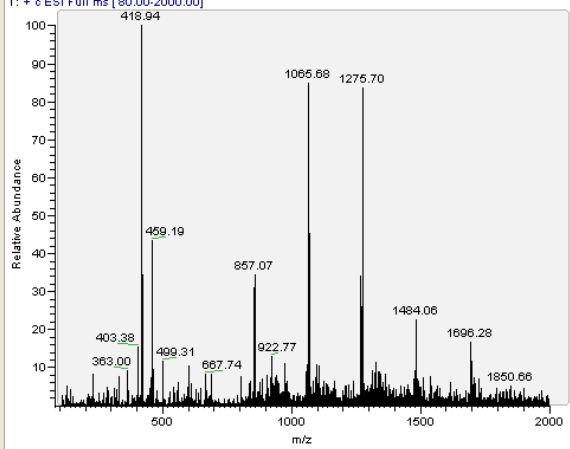

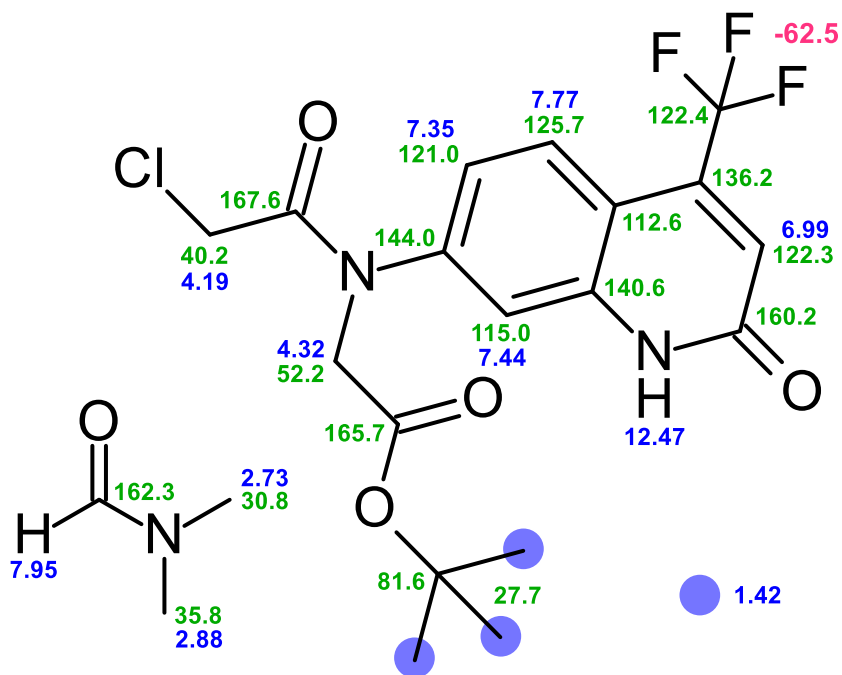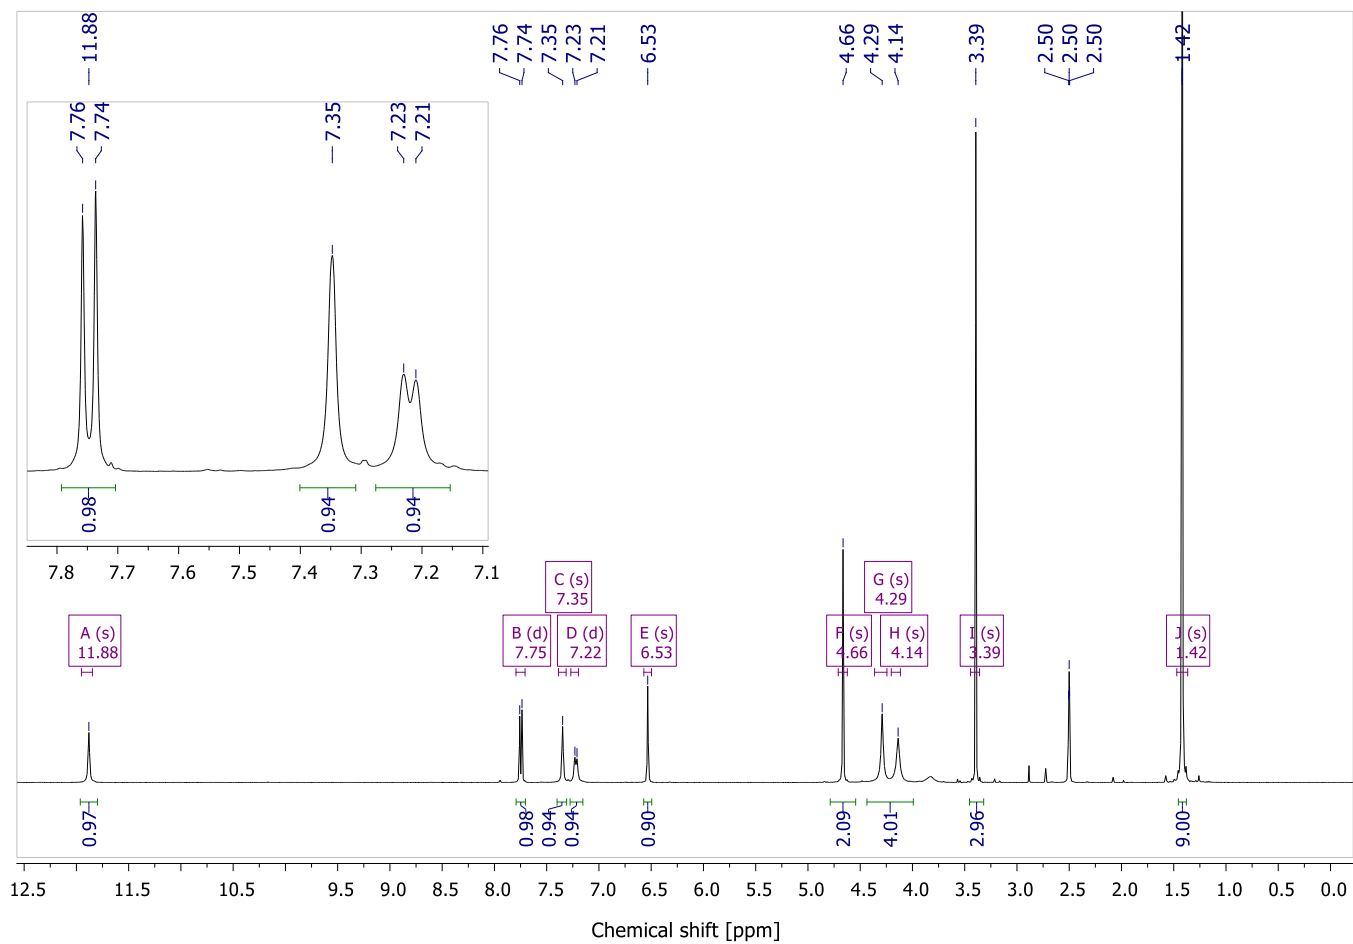

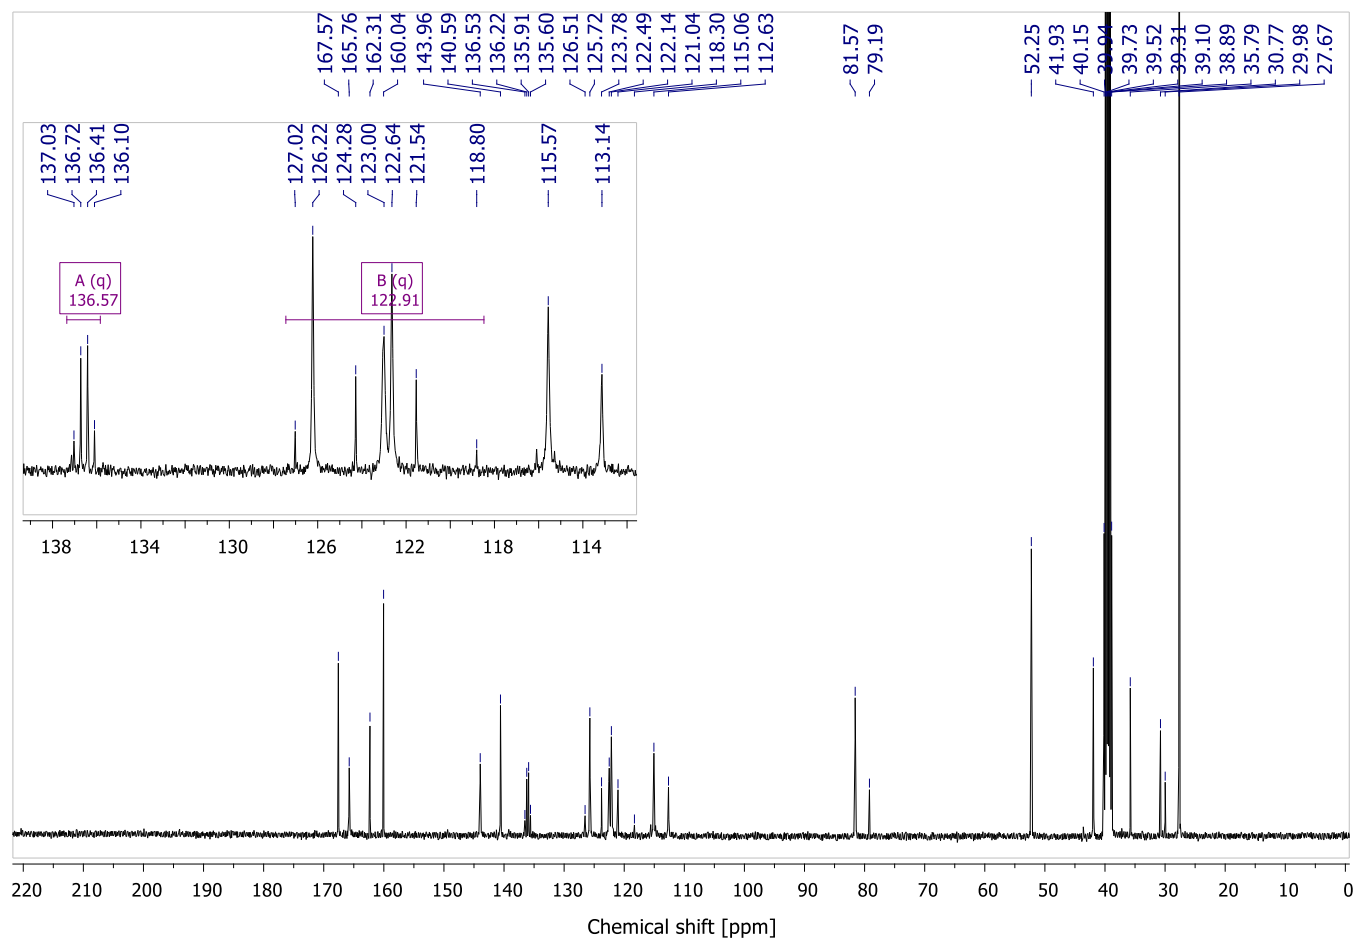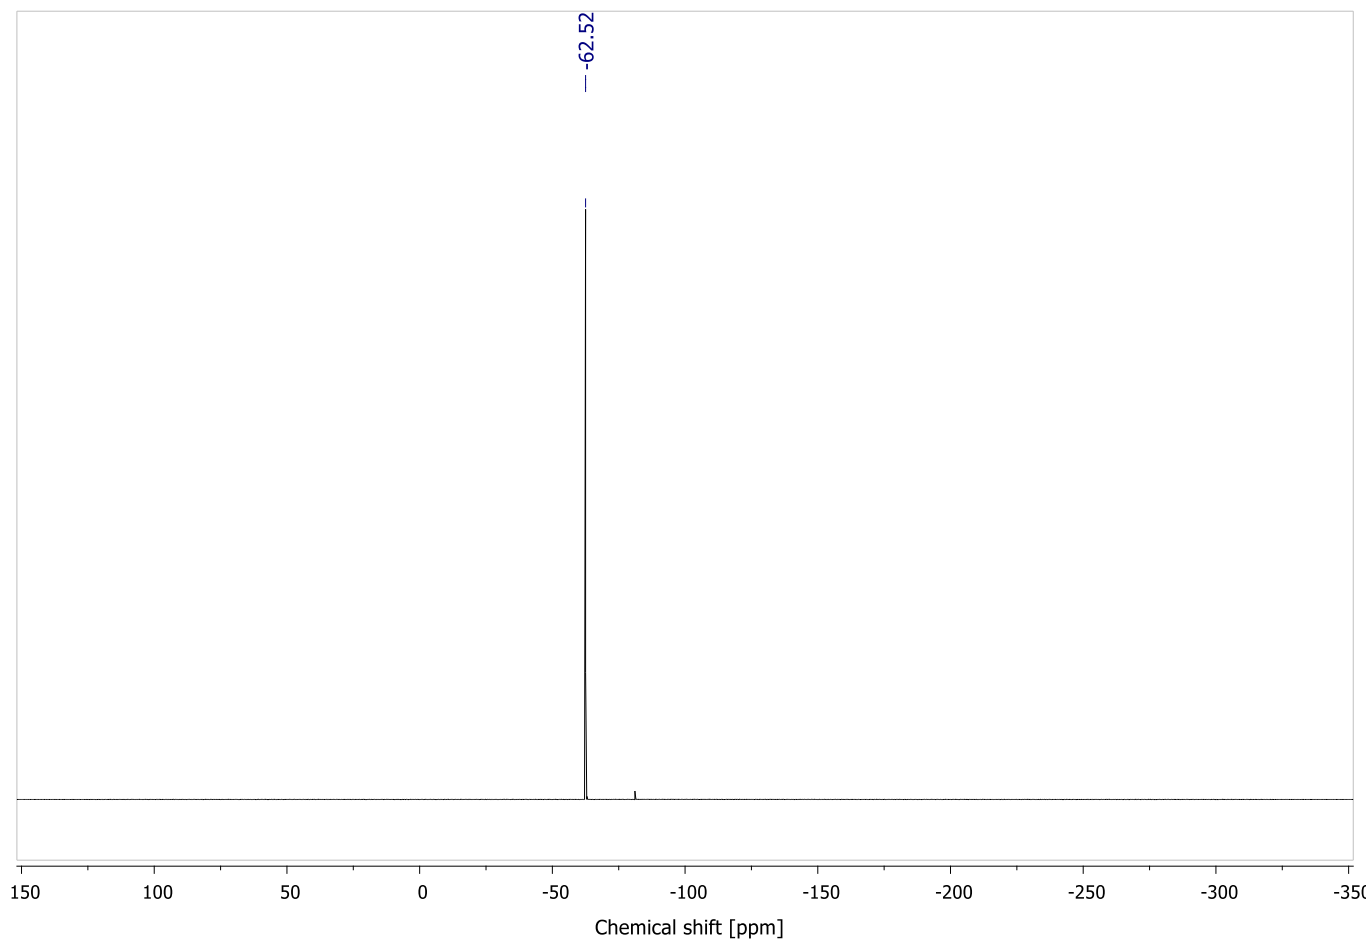

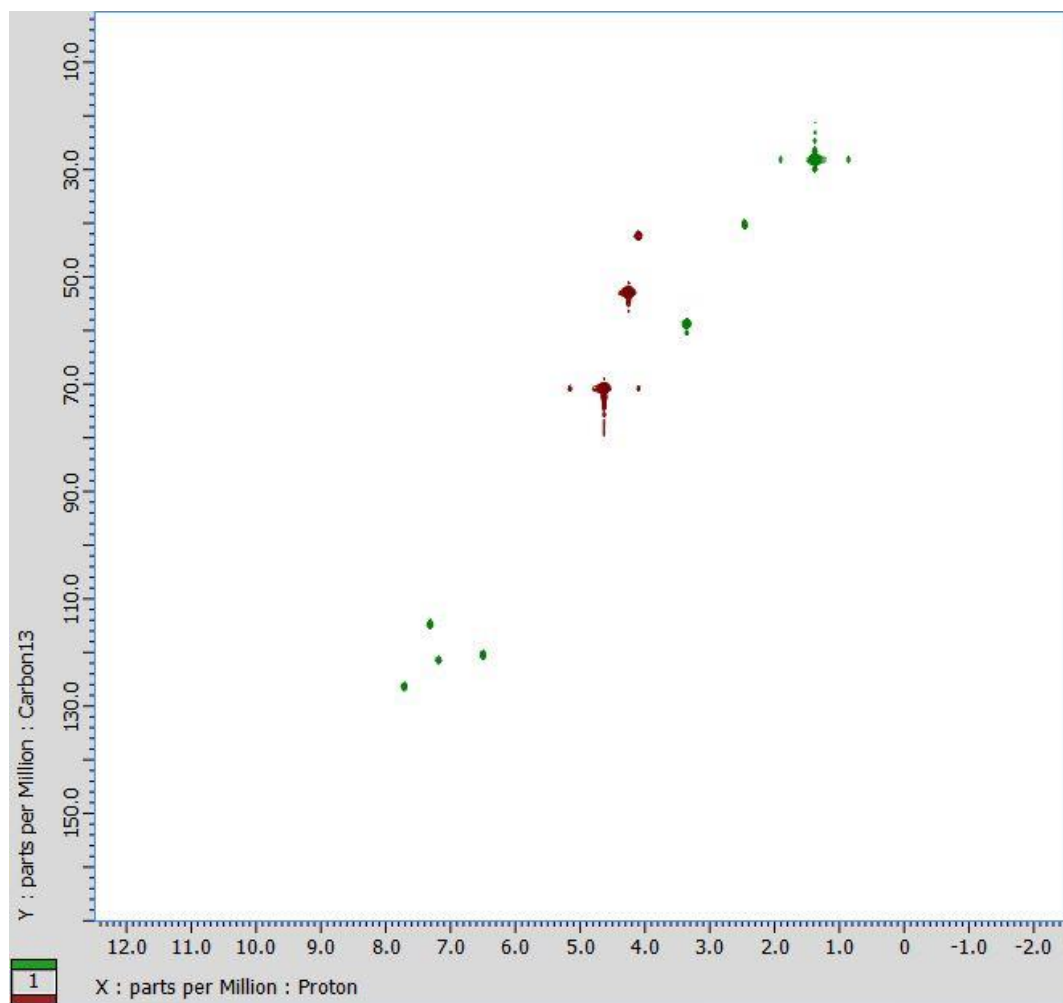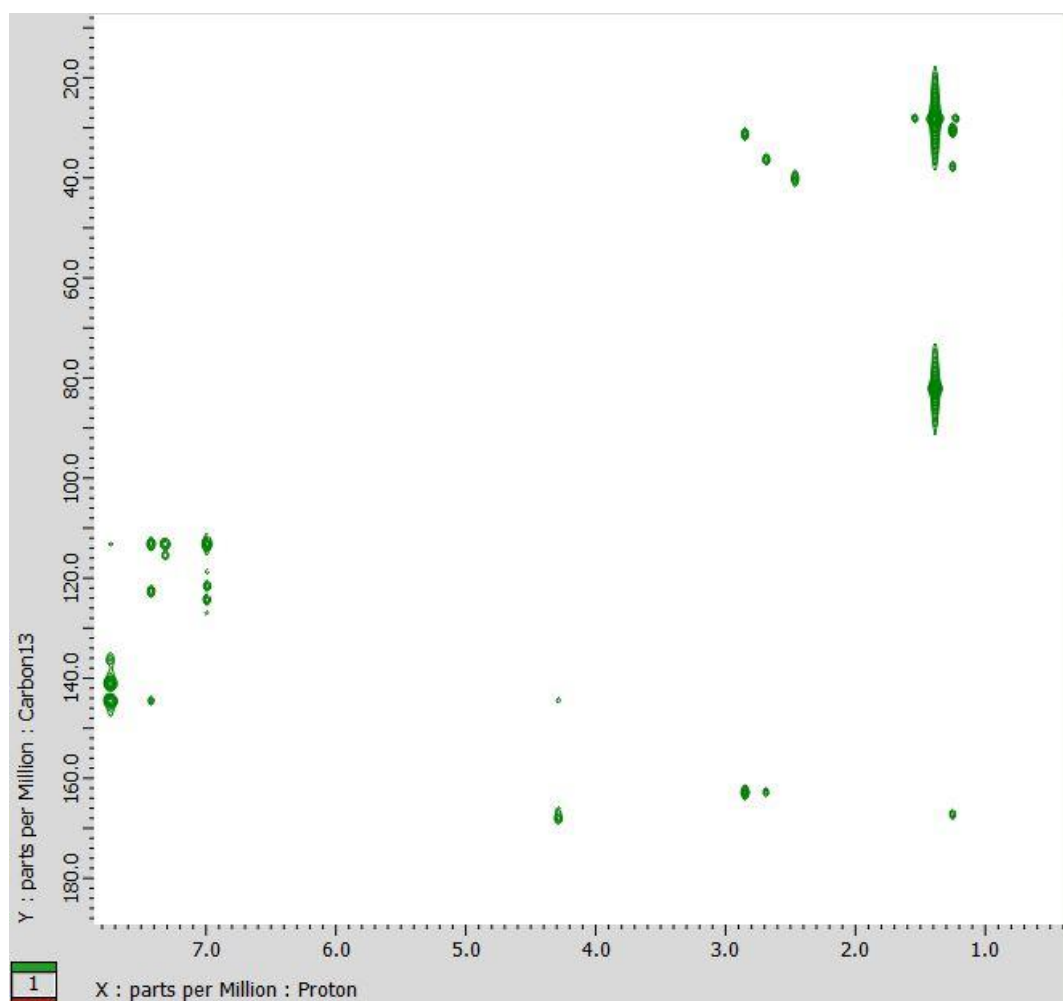

# DKS57\_060A

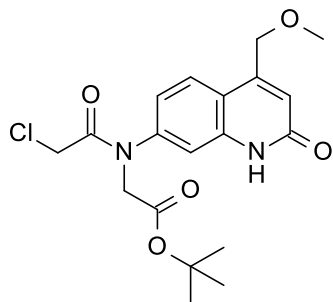

Formula Weight : 394,85(2)

Exact Mass : 394,12955

Formula : C<sub>19</sub>H<sub>23</sub>ClN<sub>2</sub>O<sub>5</sub>

Composition : C 57,80% H 5,87% N 7,09% O 20,26% Cl 8,98%

C:\Xcalibur\...\DKS57\_060A\_1090\_5um

2/7/2018 12:09:56 PM

RT: 0.00 - 10.67

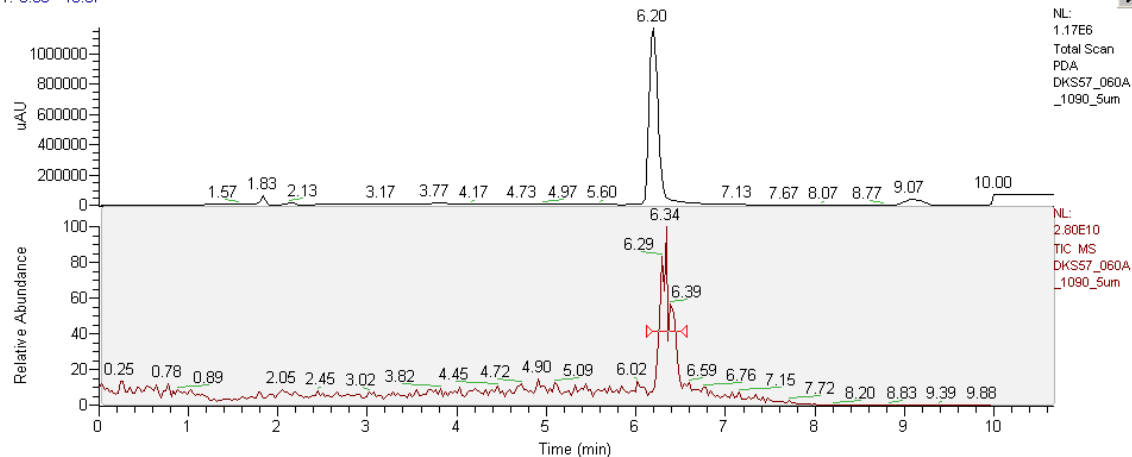

DKS57\_060A\_1090\_5um #188 RT: 6.20 AV: 1 NL: 2.62E8 microAU

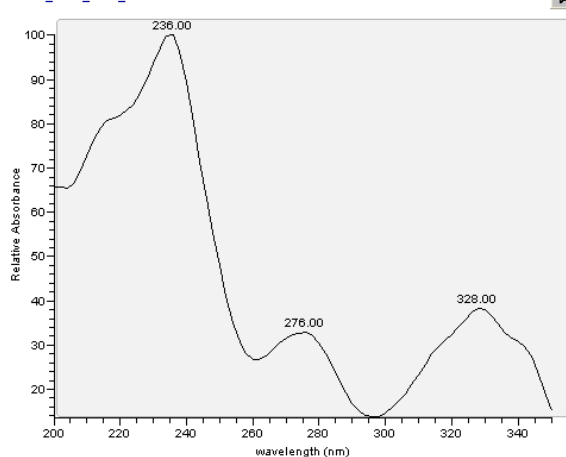

DKS57\_060A\_1090\_5um #232:244 RT: 6.18-6.49 AV: 13 NL: 3.48E8  
T: + e ESI Full ms [80.00-2000.00]

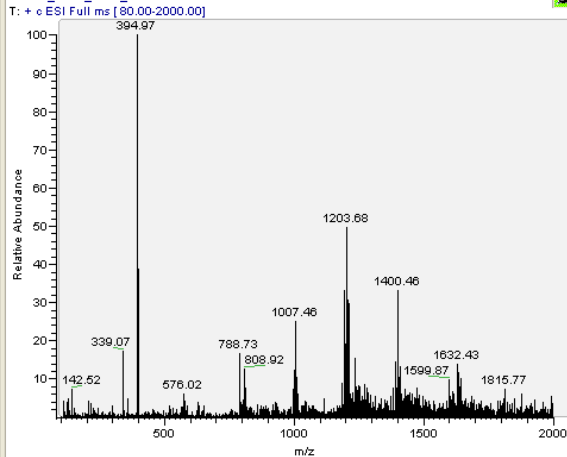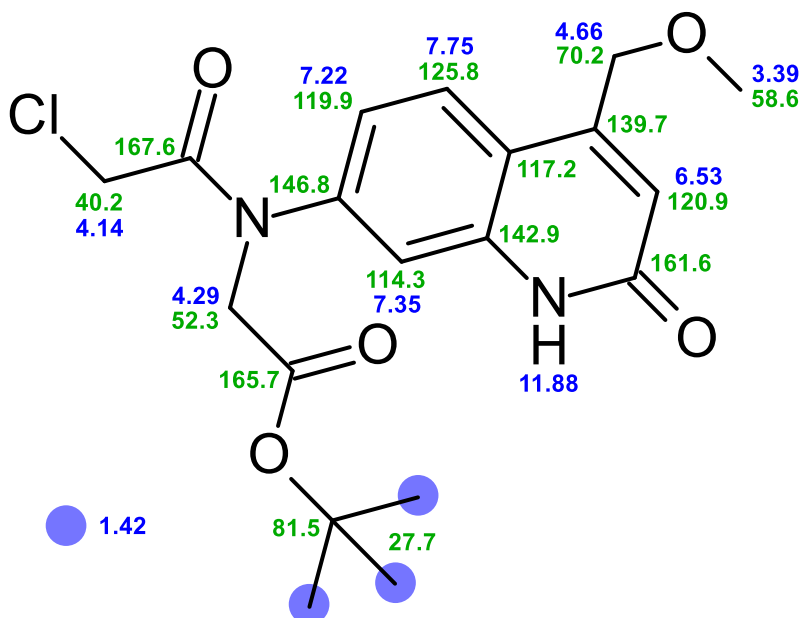

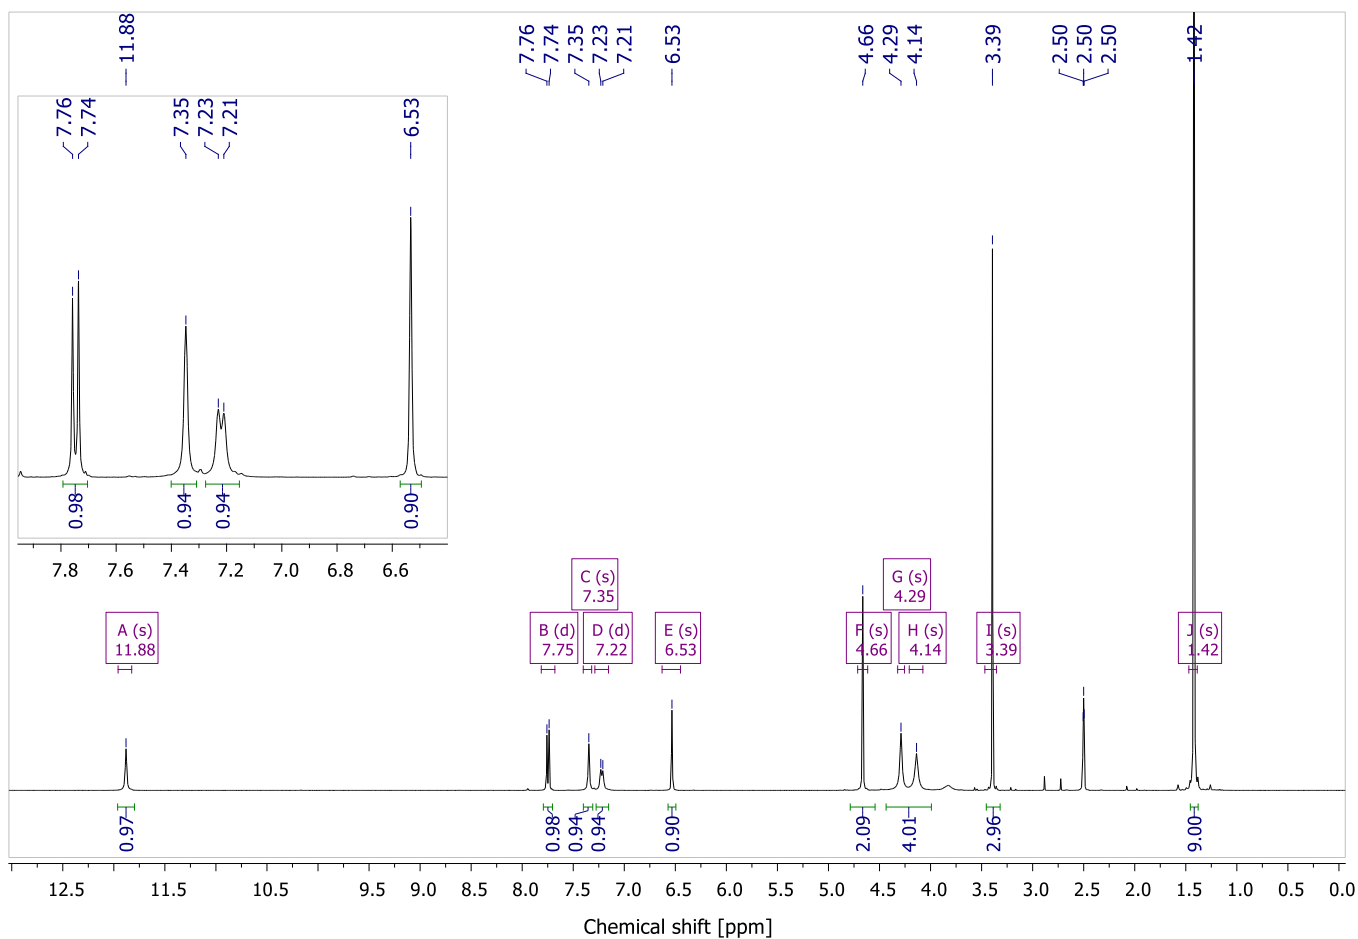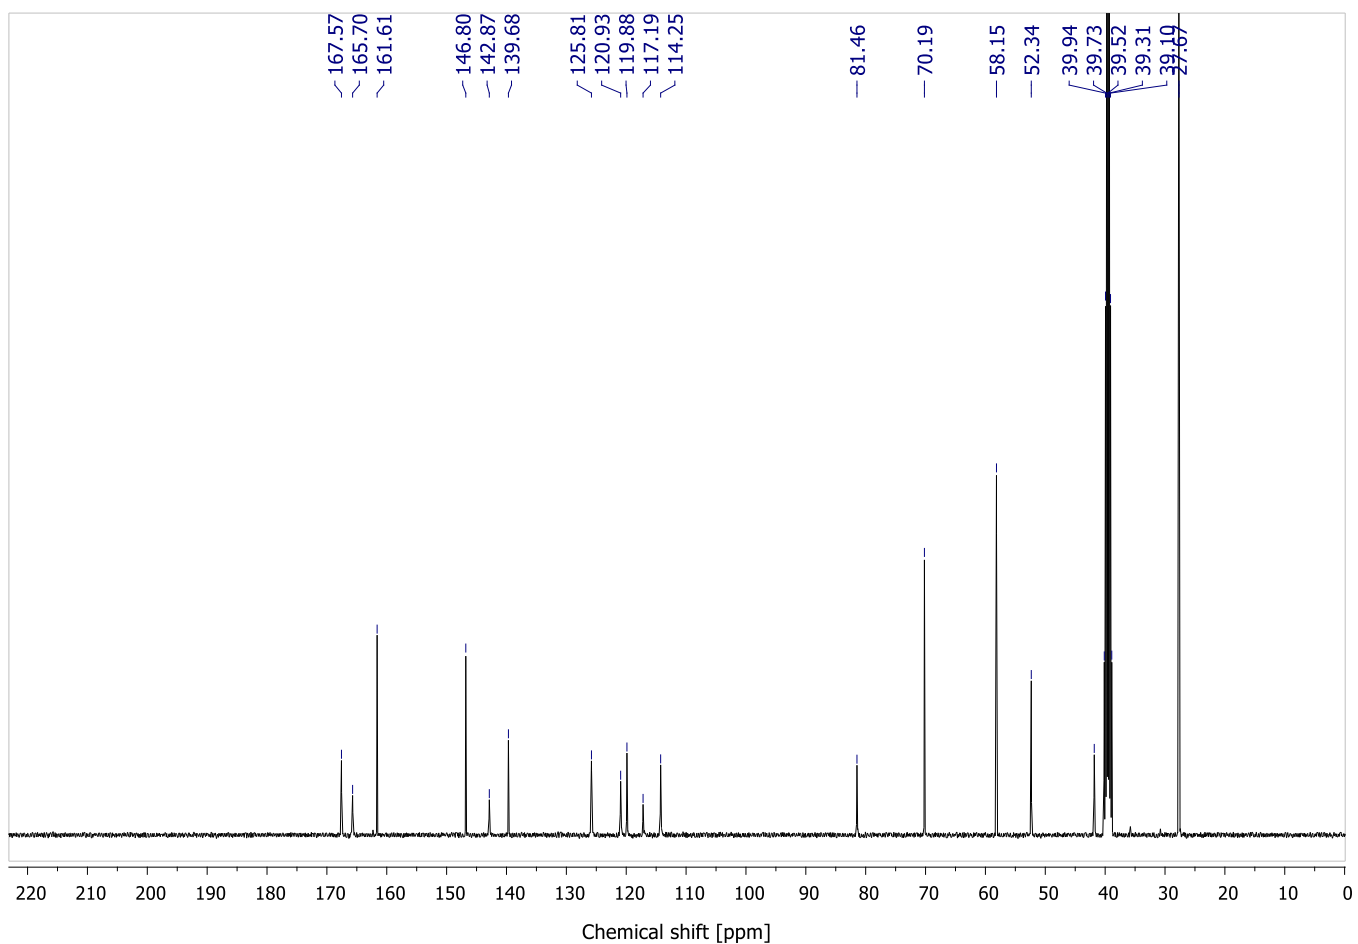

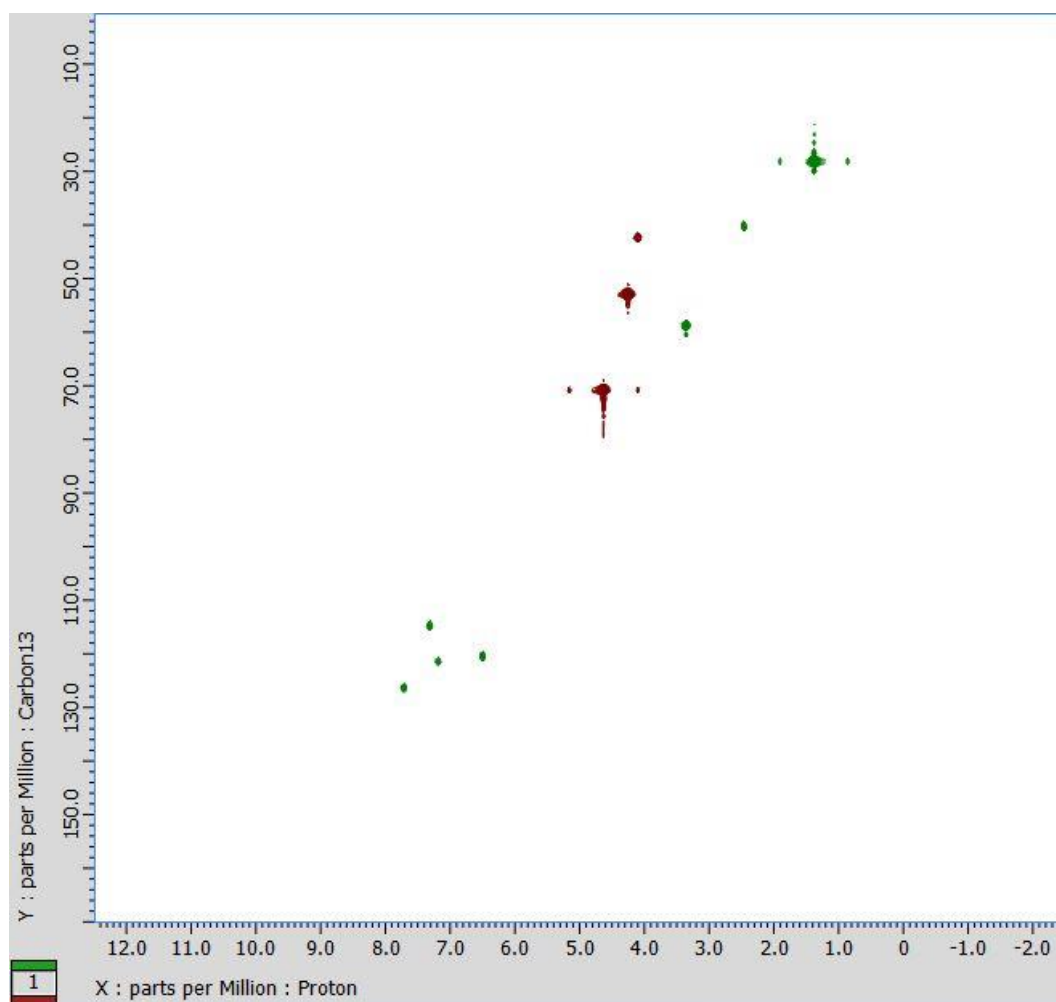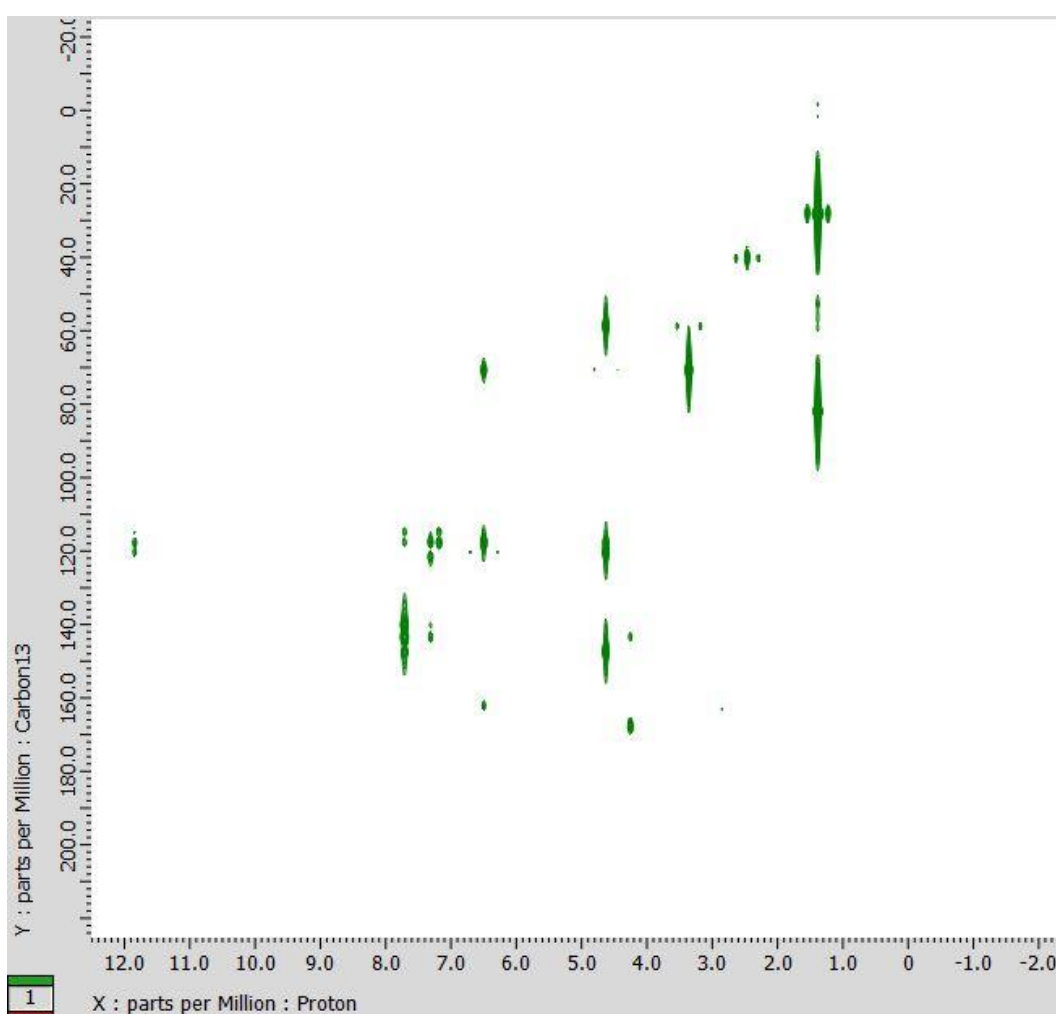



**DKS57\_063A**

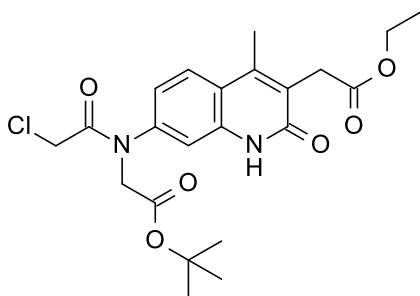

Formula Weight : 450,91(2)

Exact Mass : 450,15576

Formula :  $C_{22}H_{27}ClN_2O_6$

Composition : C 58,60% H 6,04% N 6,21% O 21,29% Cl 7,86%

C:\Xcalibur\... \DKS57\_063A\_1090\_5um

2/7/2018 12:42:14 PM

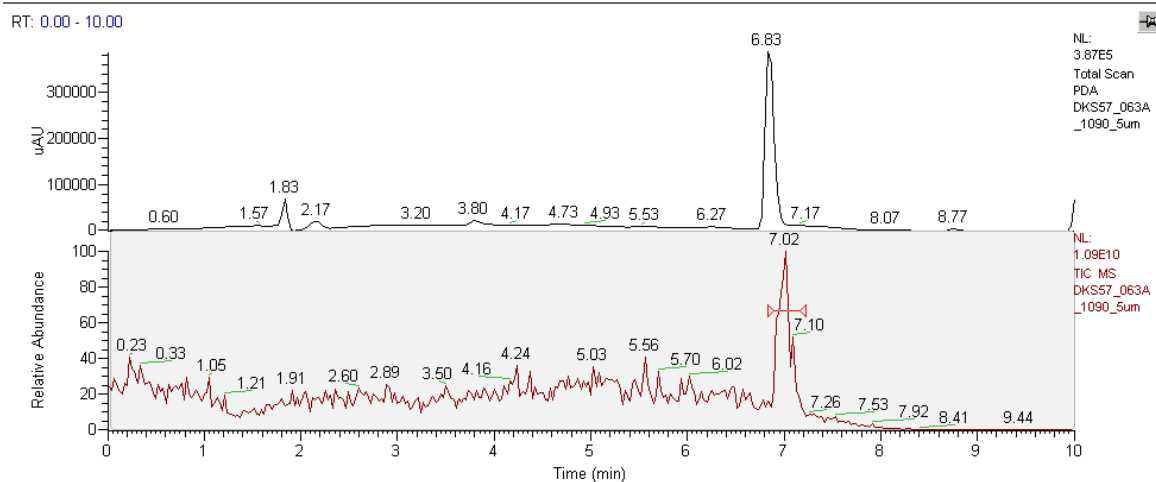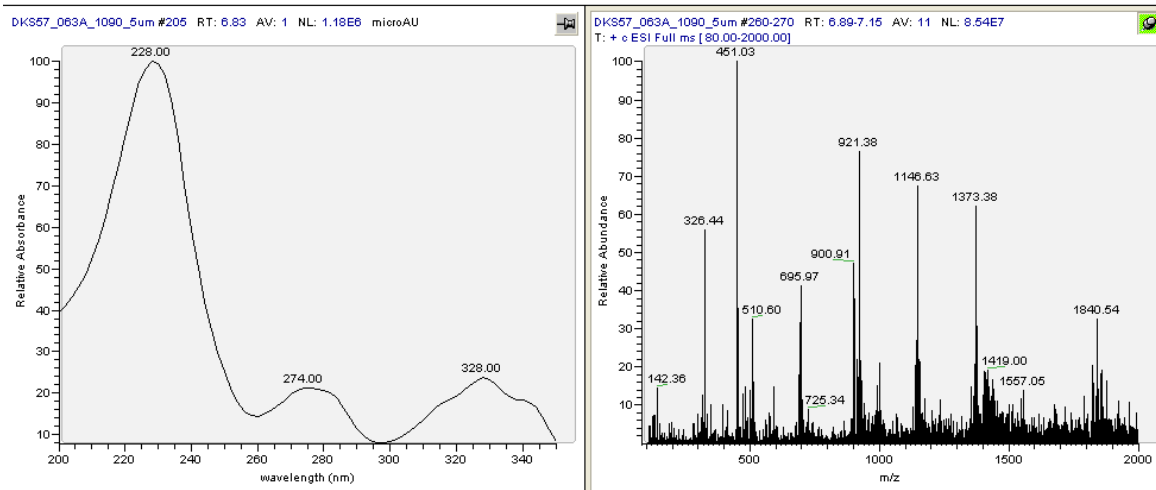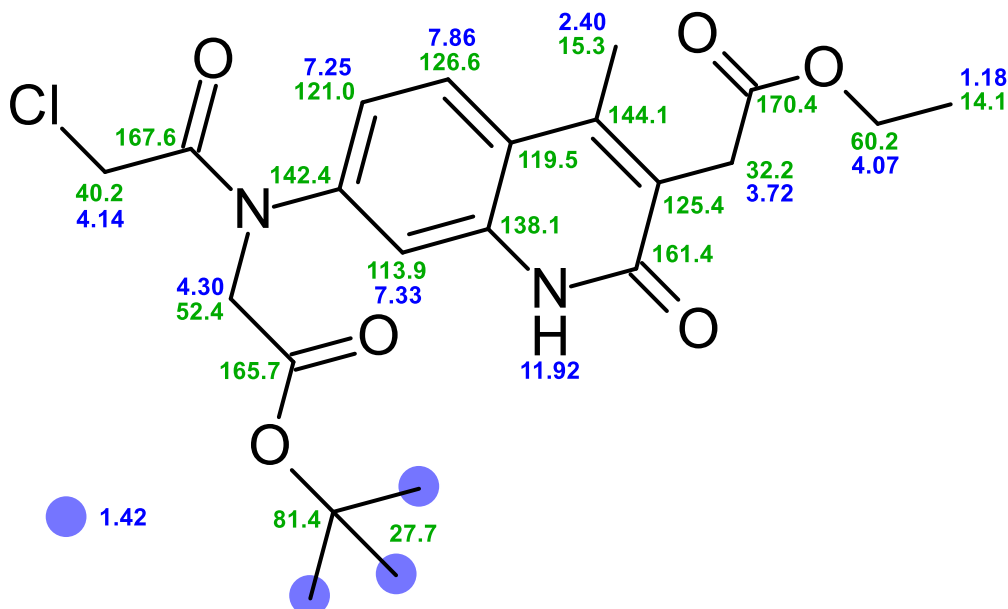

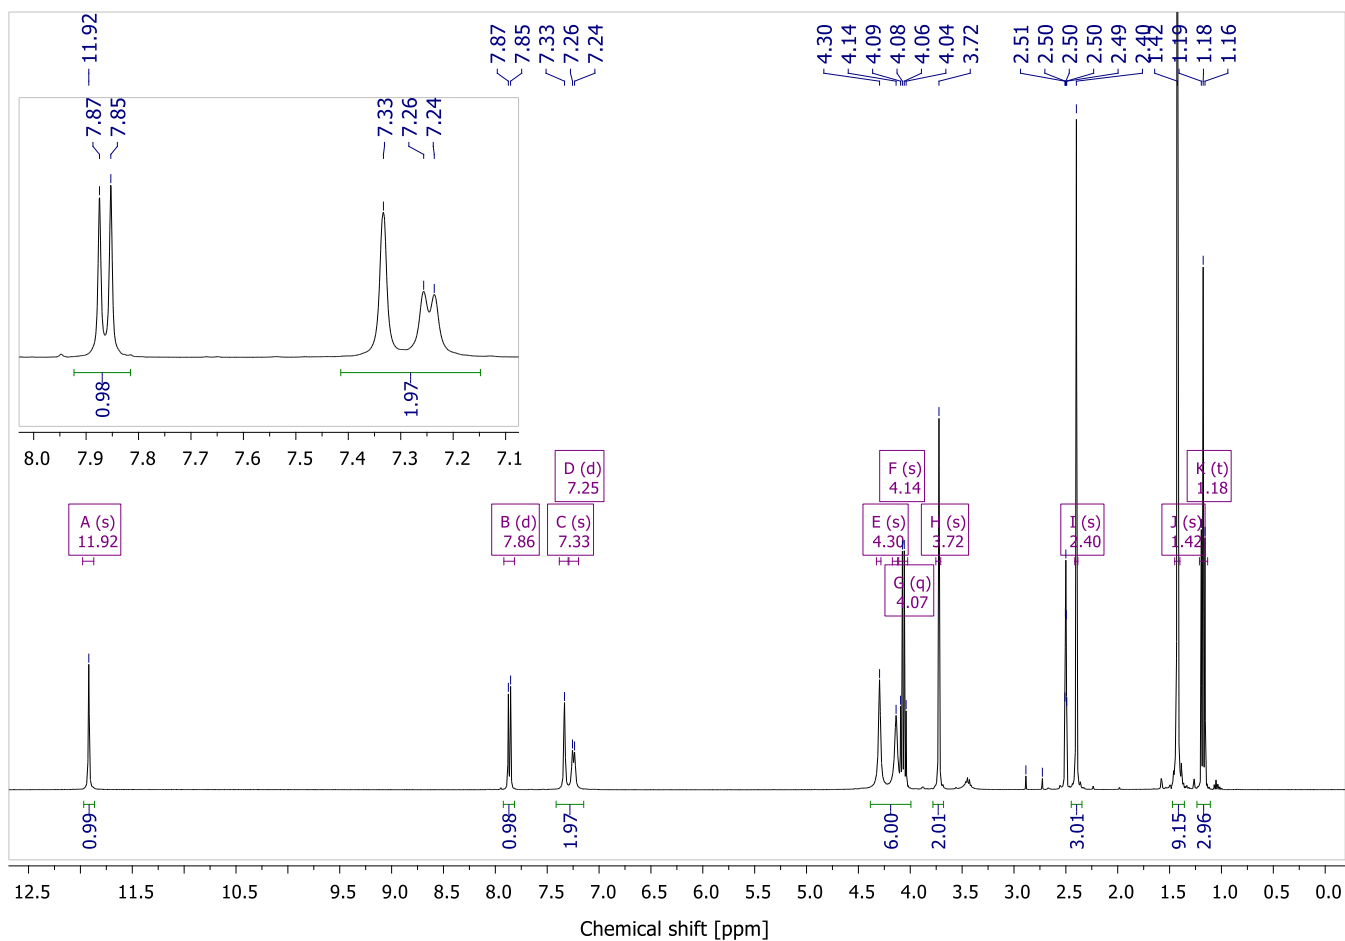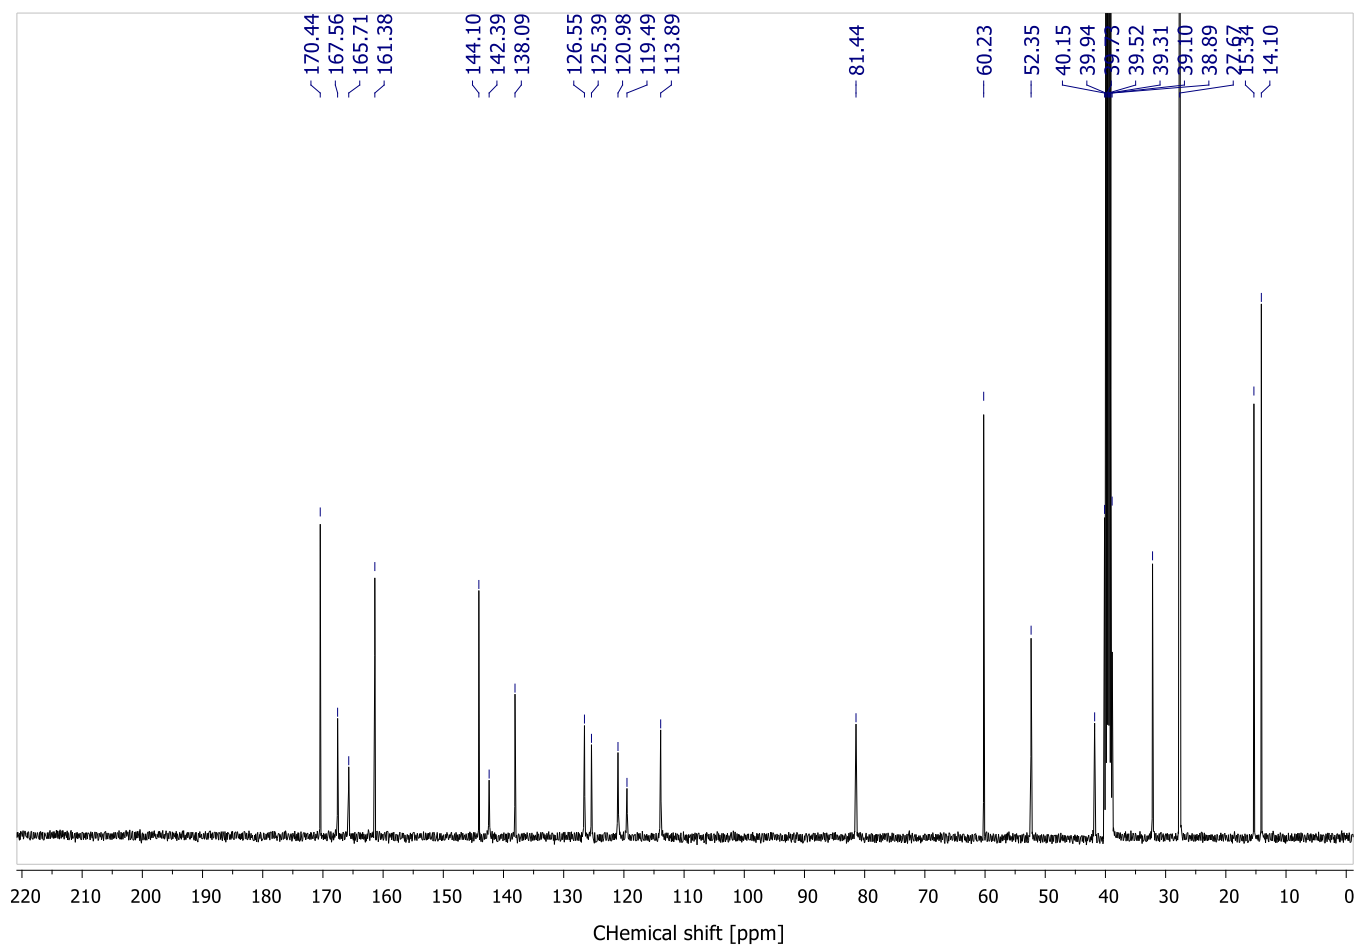

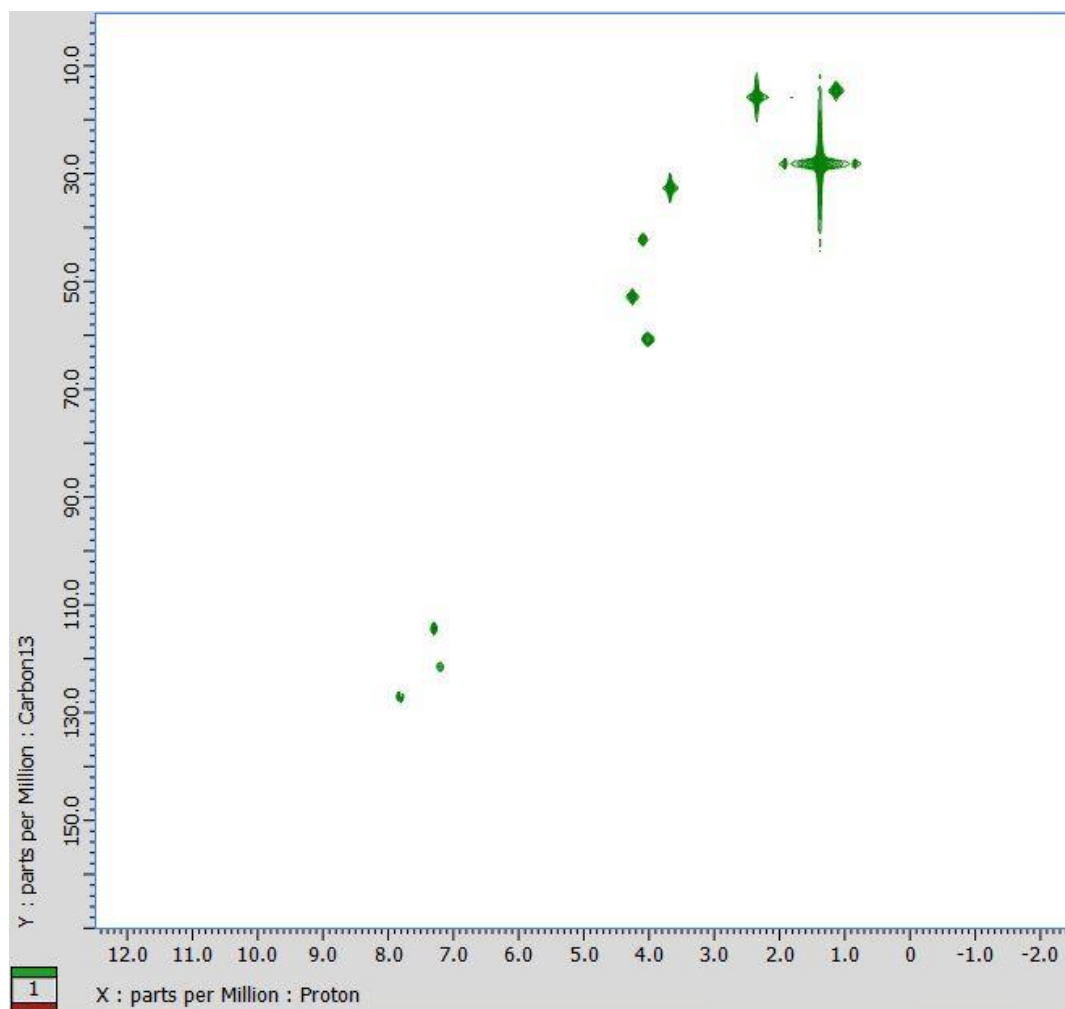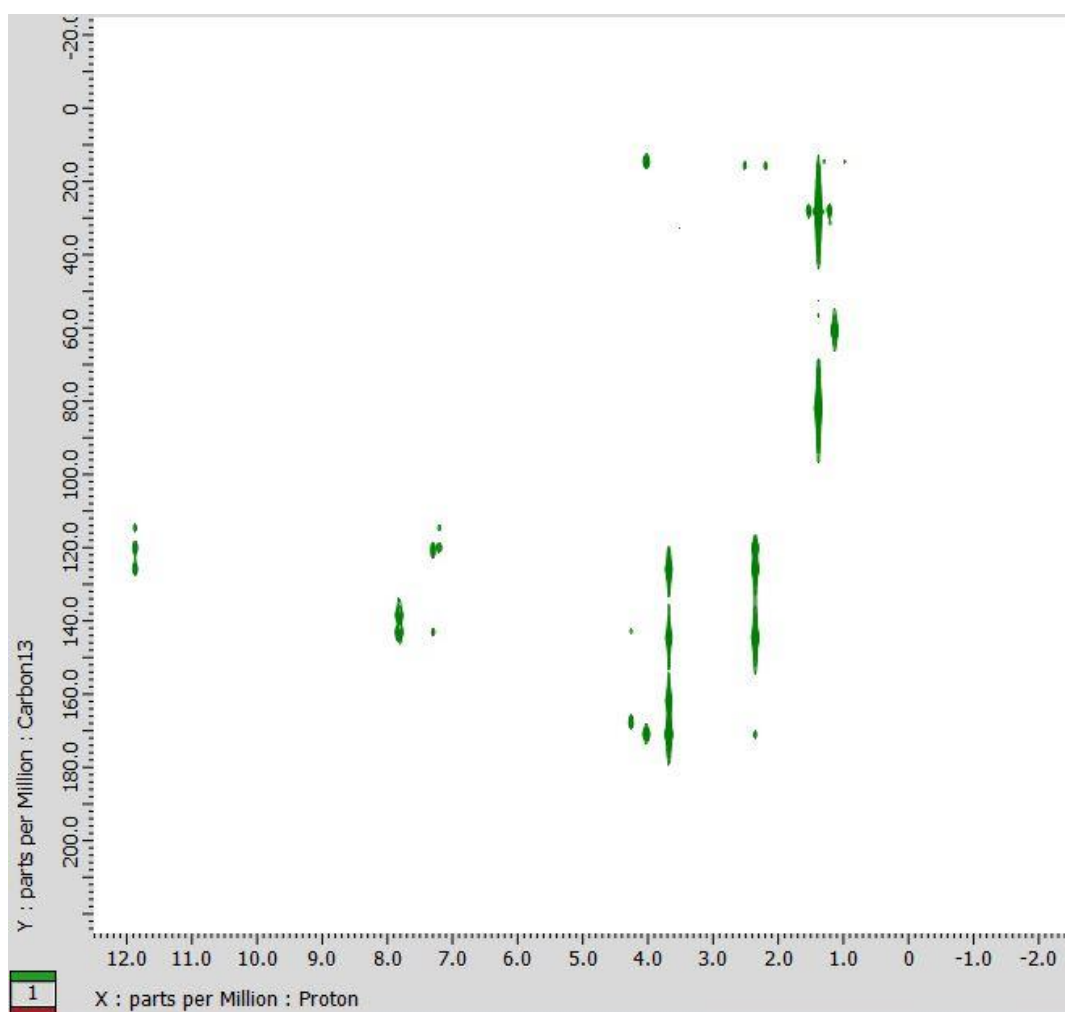

# DKS57\_059A

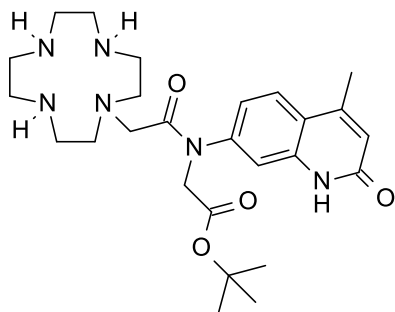

Formula Weight : 500,63(2)

Exact Mass : 500,31110

Formula :  $C_{26}H_{40}N_6O_4$

Composition : C 62,38% H 8,05% N 16,79% O 12,78%

C:\Xcalibur\...DKS57\_059A\_1050\_5um

2/7/2018 1:14:36 PM

RT: 0.00 - 16.00

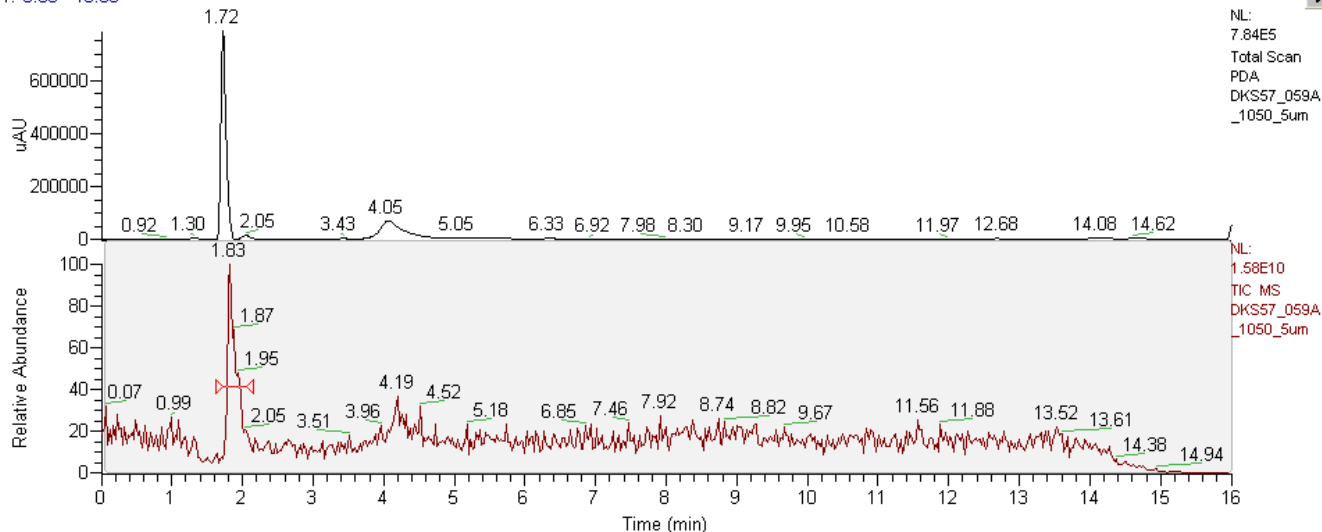

DKS57\_059A\_1050\_5um #103 RT: 1.72 AV: 1 NL: 2.75E6 microAU

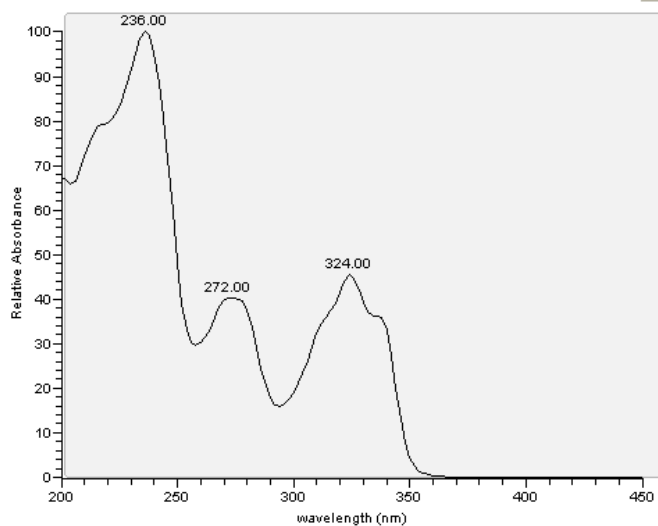

DKS57\_059A\_1050\_5um #65-78 RT: 1.72-2.05 AV: 14 NL: 2.97E9  
T: + c ESI Full ms [80.00-2000.00]

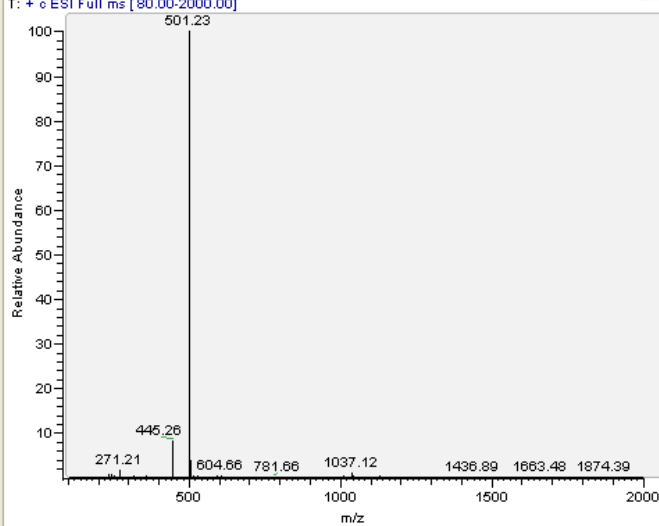

RT: 0.00 - 16.00

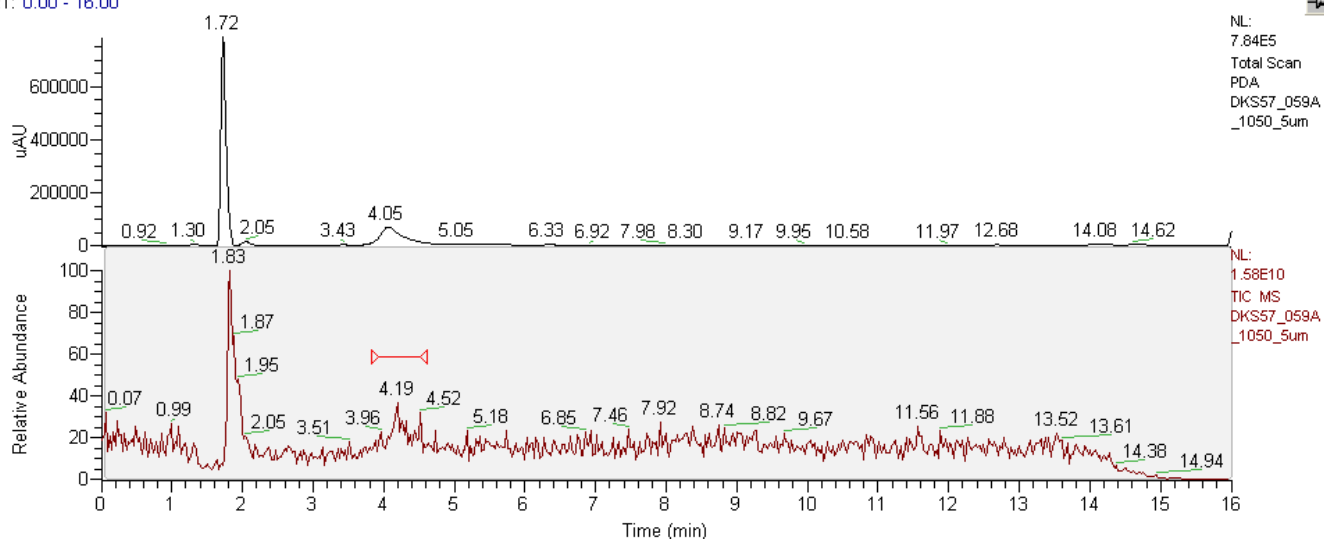

DKS57\_059A\_1050\_5um #243 RT: 4.05 AV: 1 NL: 3.39E5 microAU

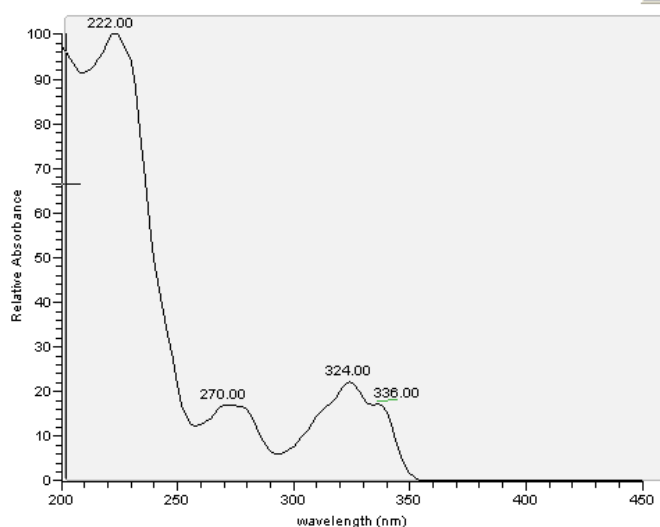DKS57\_059A\_1050\_5um #148-171 RT: 3.91-4.50 AV: 24 NL: 7.48E8  
T: + c ESI Full ms [80.00-2000.00]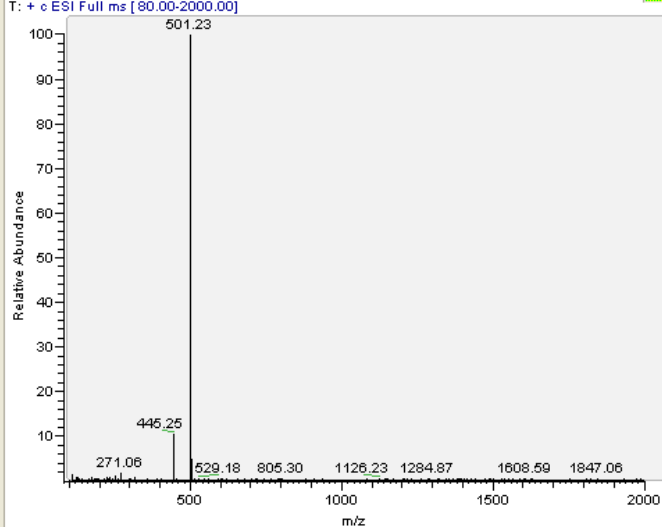

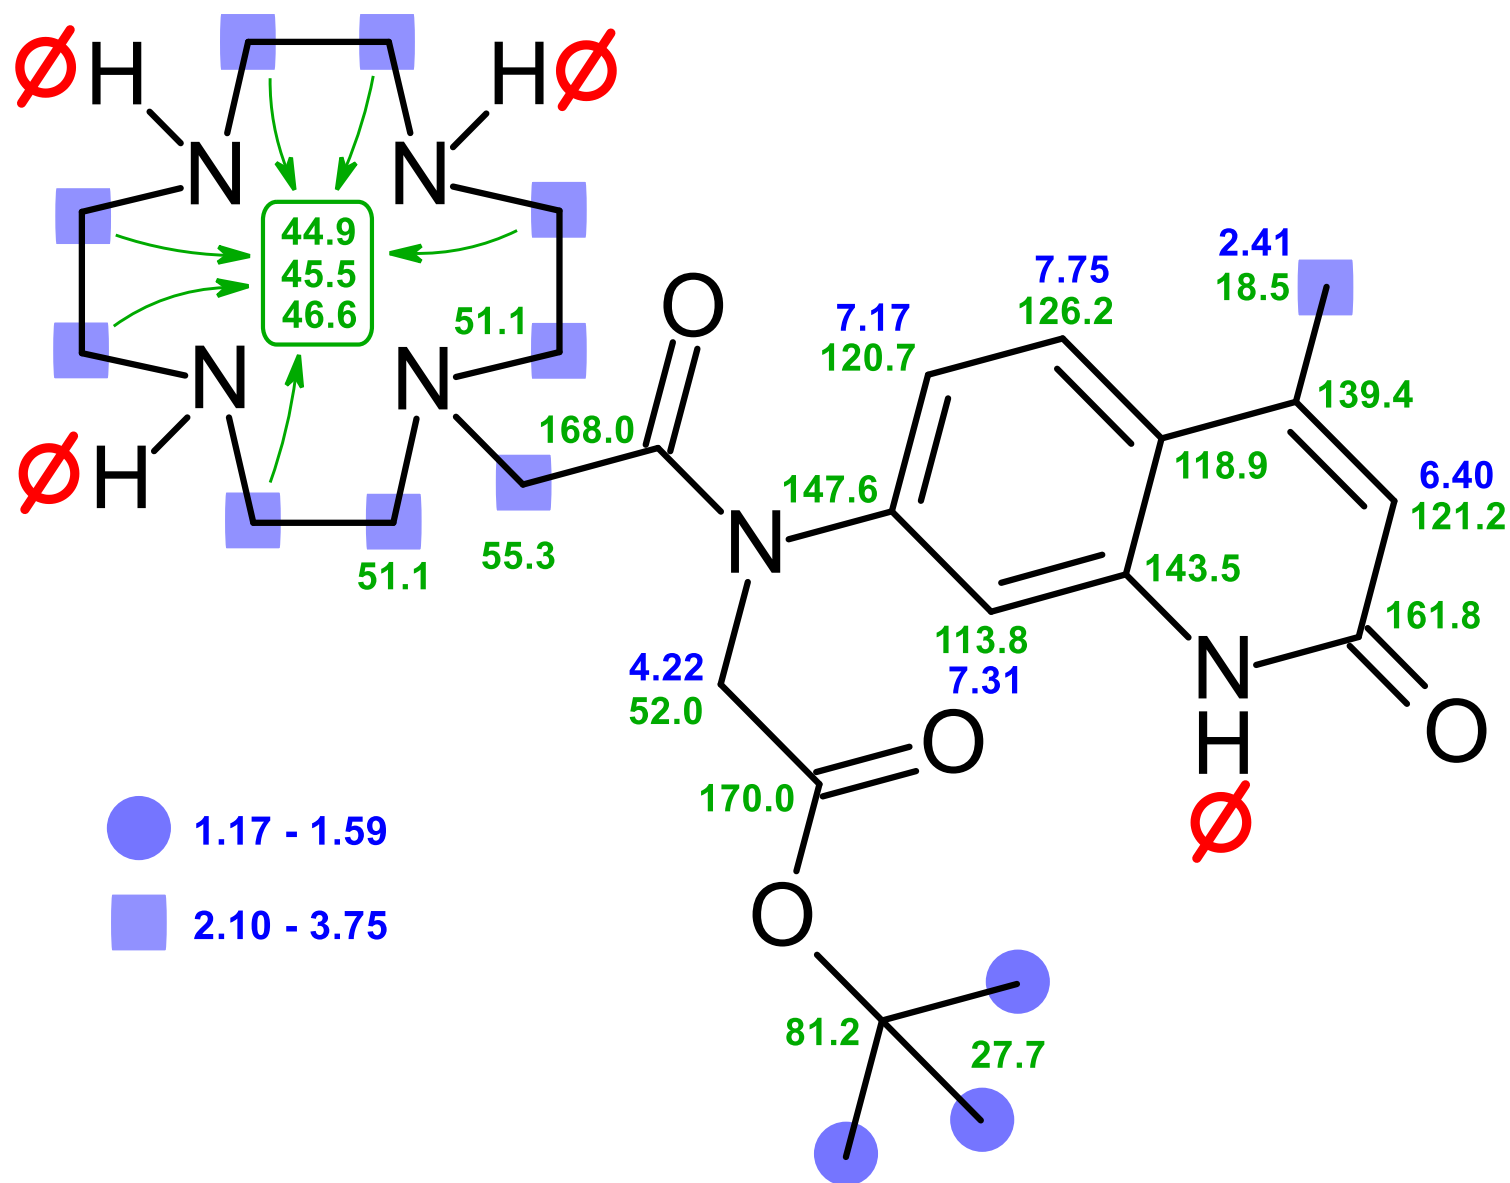

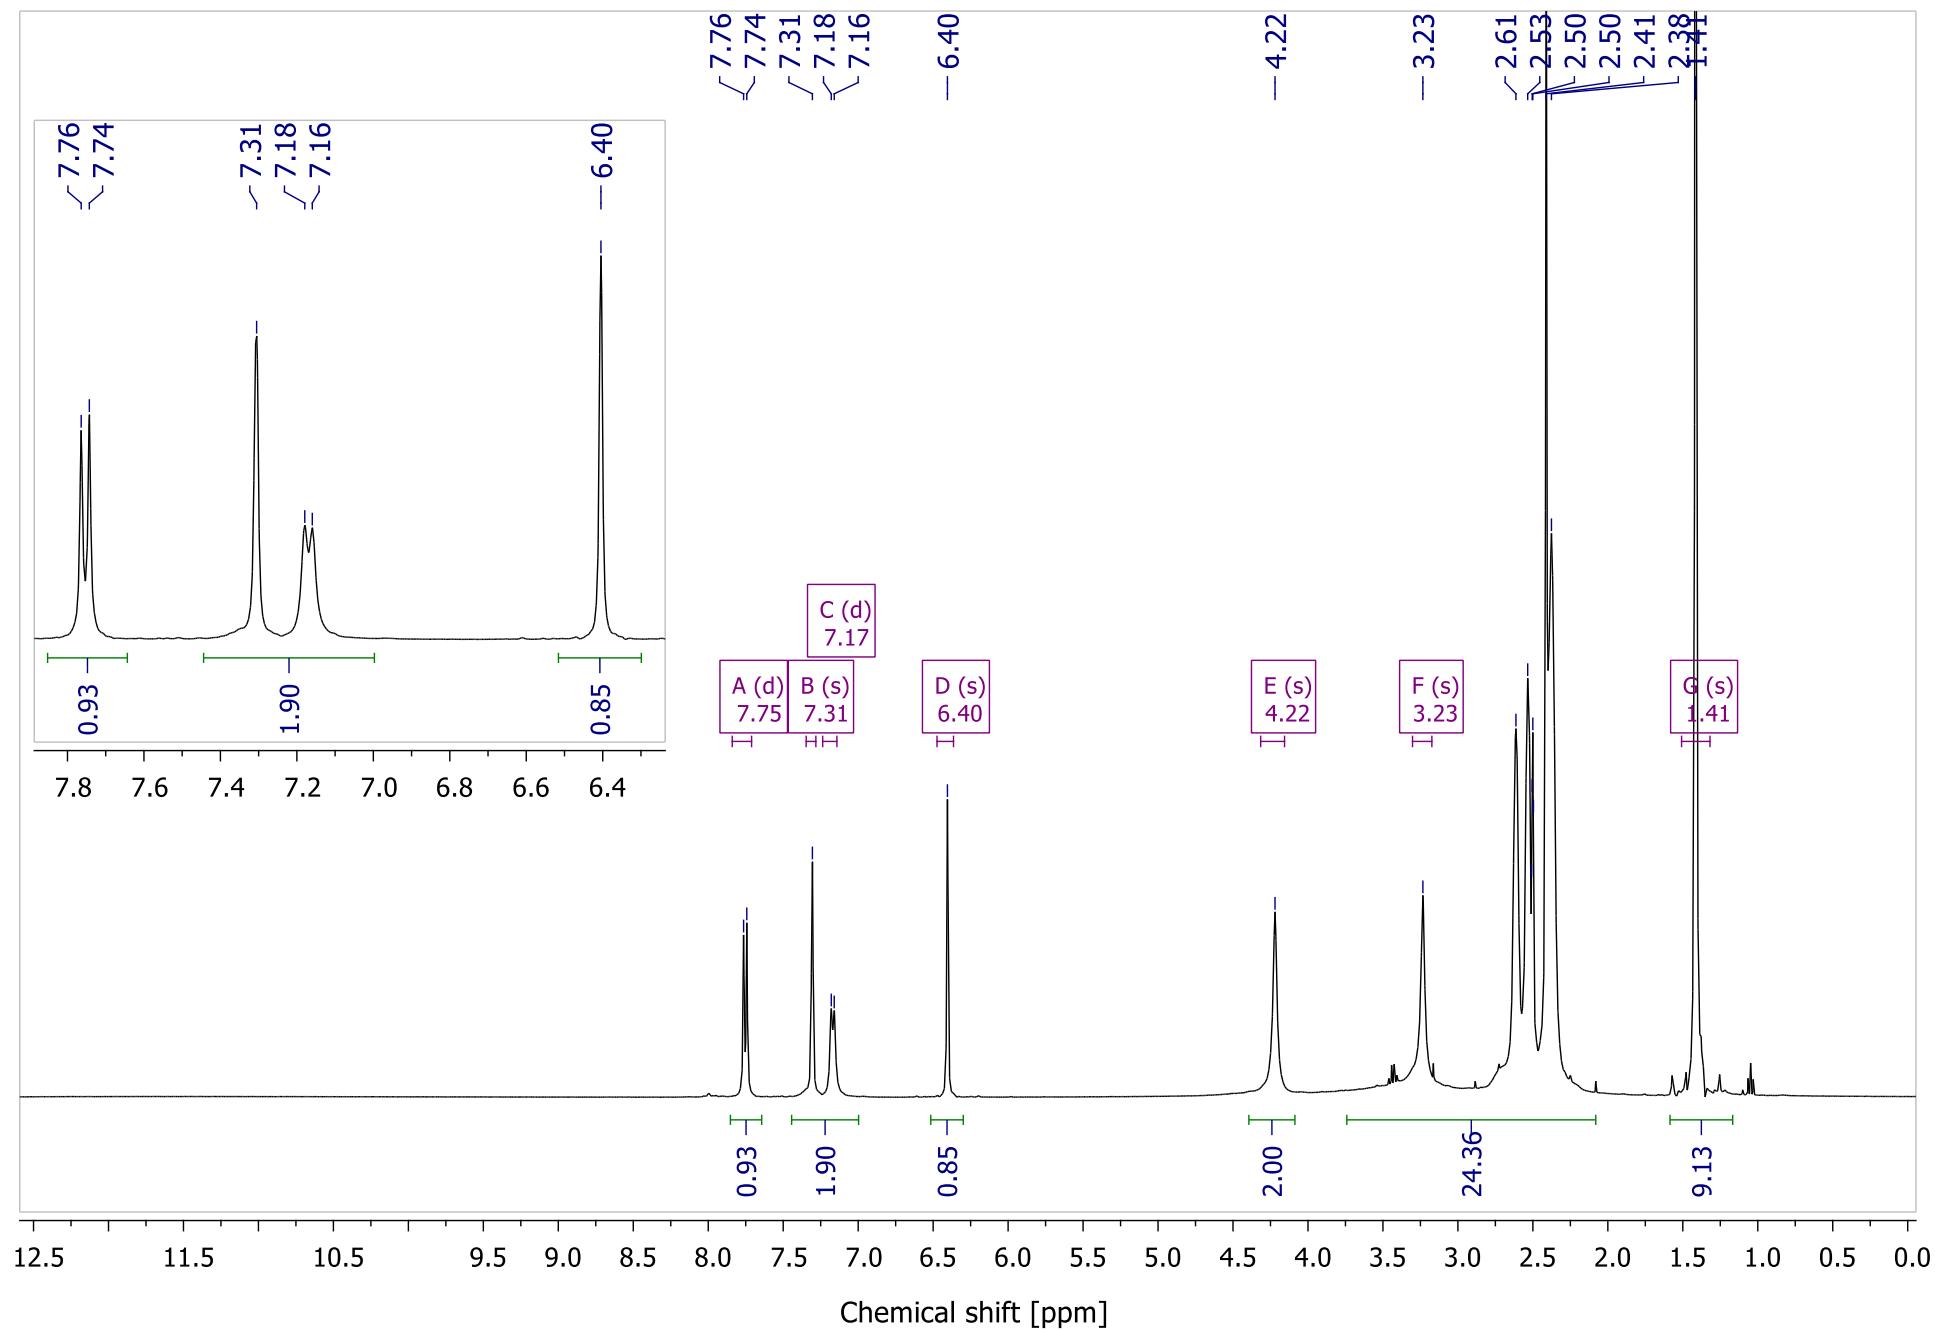

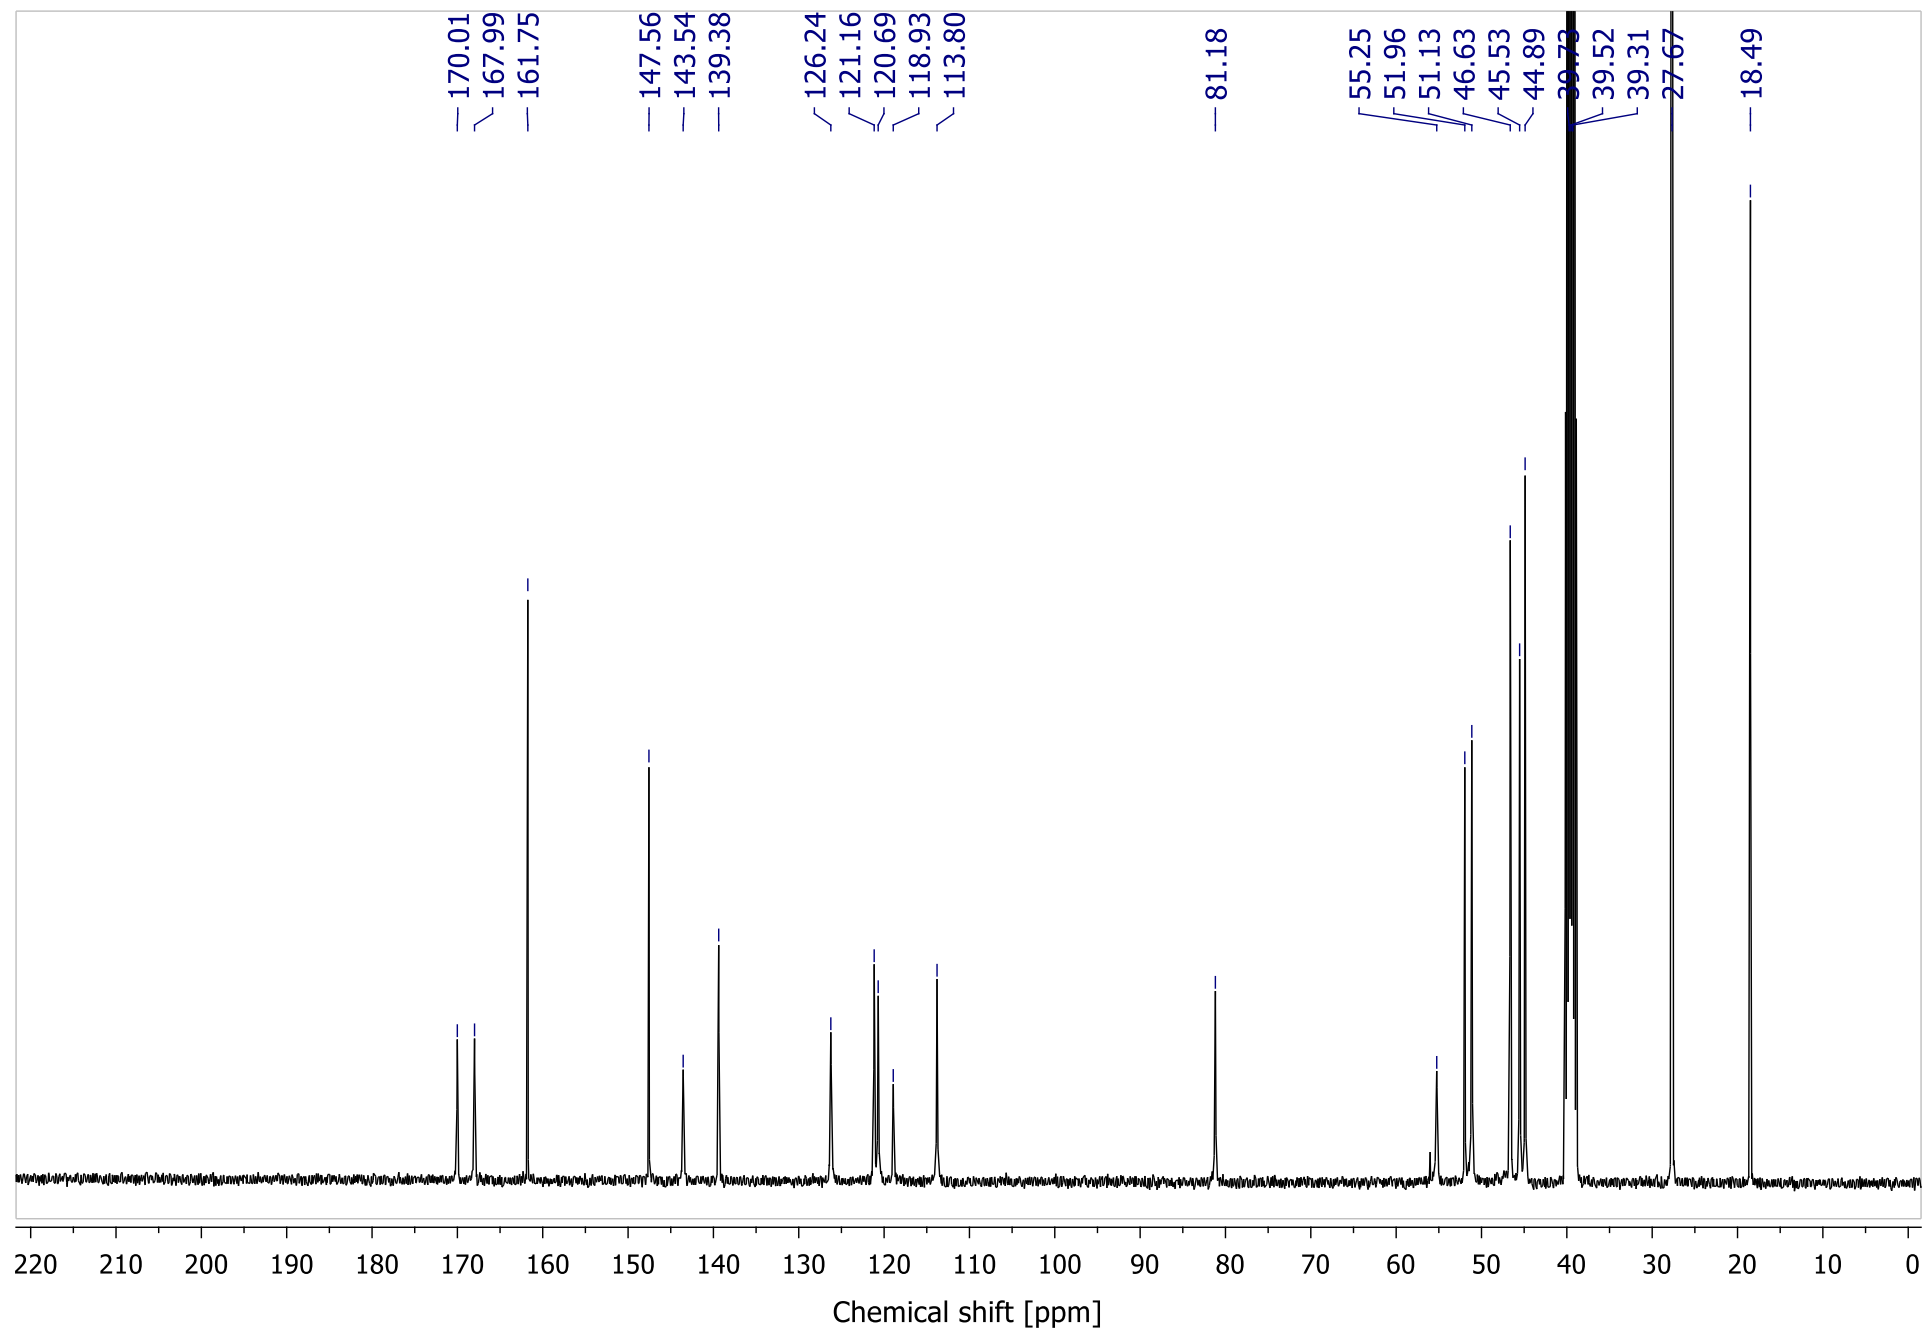



# DKS57\_066A

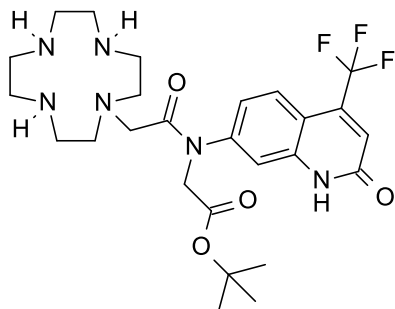

Formula Weight : 554,60(2)

Exact Mass : 554,28284

Formula :  $C_{26}H_{37}F_3N_6O_4$

Composition : C 56,31% H 6,72% N 15,15% O 11,54% F 10,28%

C:\Xcalibur\...DKS57\_066A\_1050\_5um

2/7/2018 1:47:52 PM

RT: 0.00 - 16.00

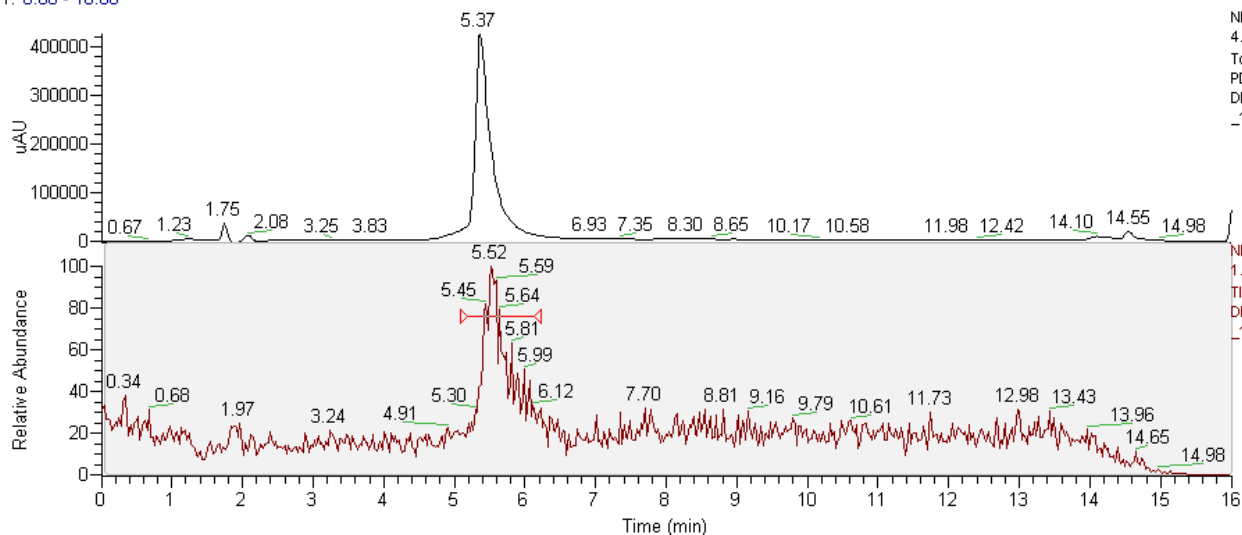

NL:  
4.26E5  
Total Scan  
PDA  
DKS57\_066A  
\_1050\_5um

NL:  
1.26E10  
TIC MS  
DKS57\_066A  
\_1050\_5um

DKS57\_066A\_1050\_5um #322 RT: 5.37 AV: 1 NL: 1.67E6 microAU

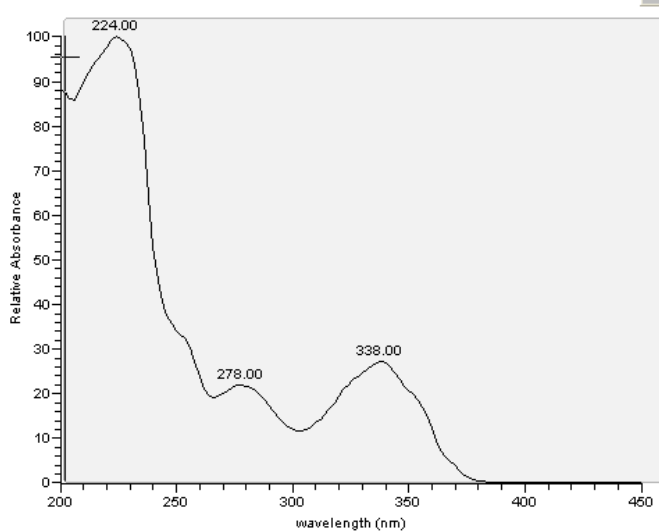

DKS57\_066A\_1050\_5um #195-233 RT: 5.17-6.12 AV: 39 NL: 2.77E9  
T: + c ESI Full ms [80.00-2000.00]

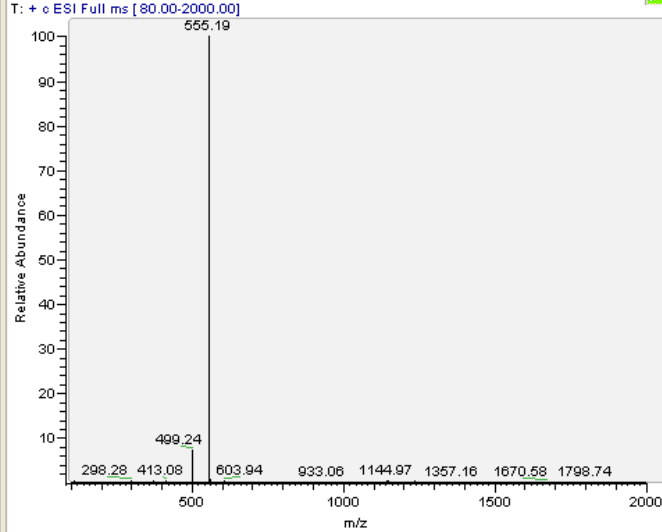



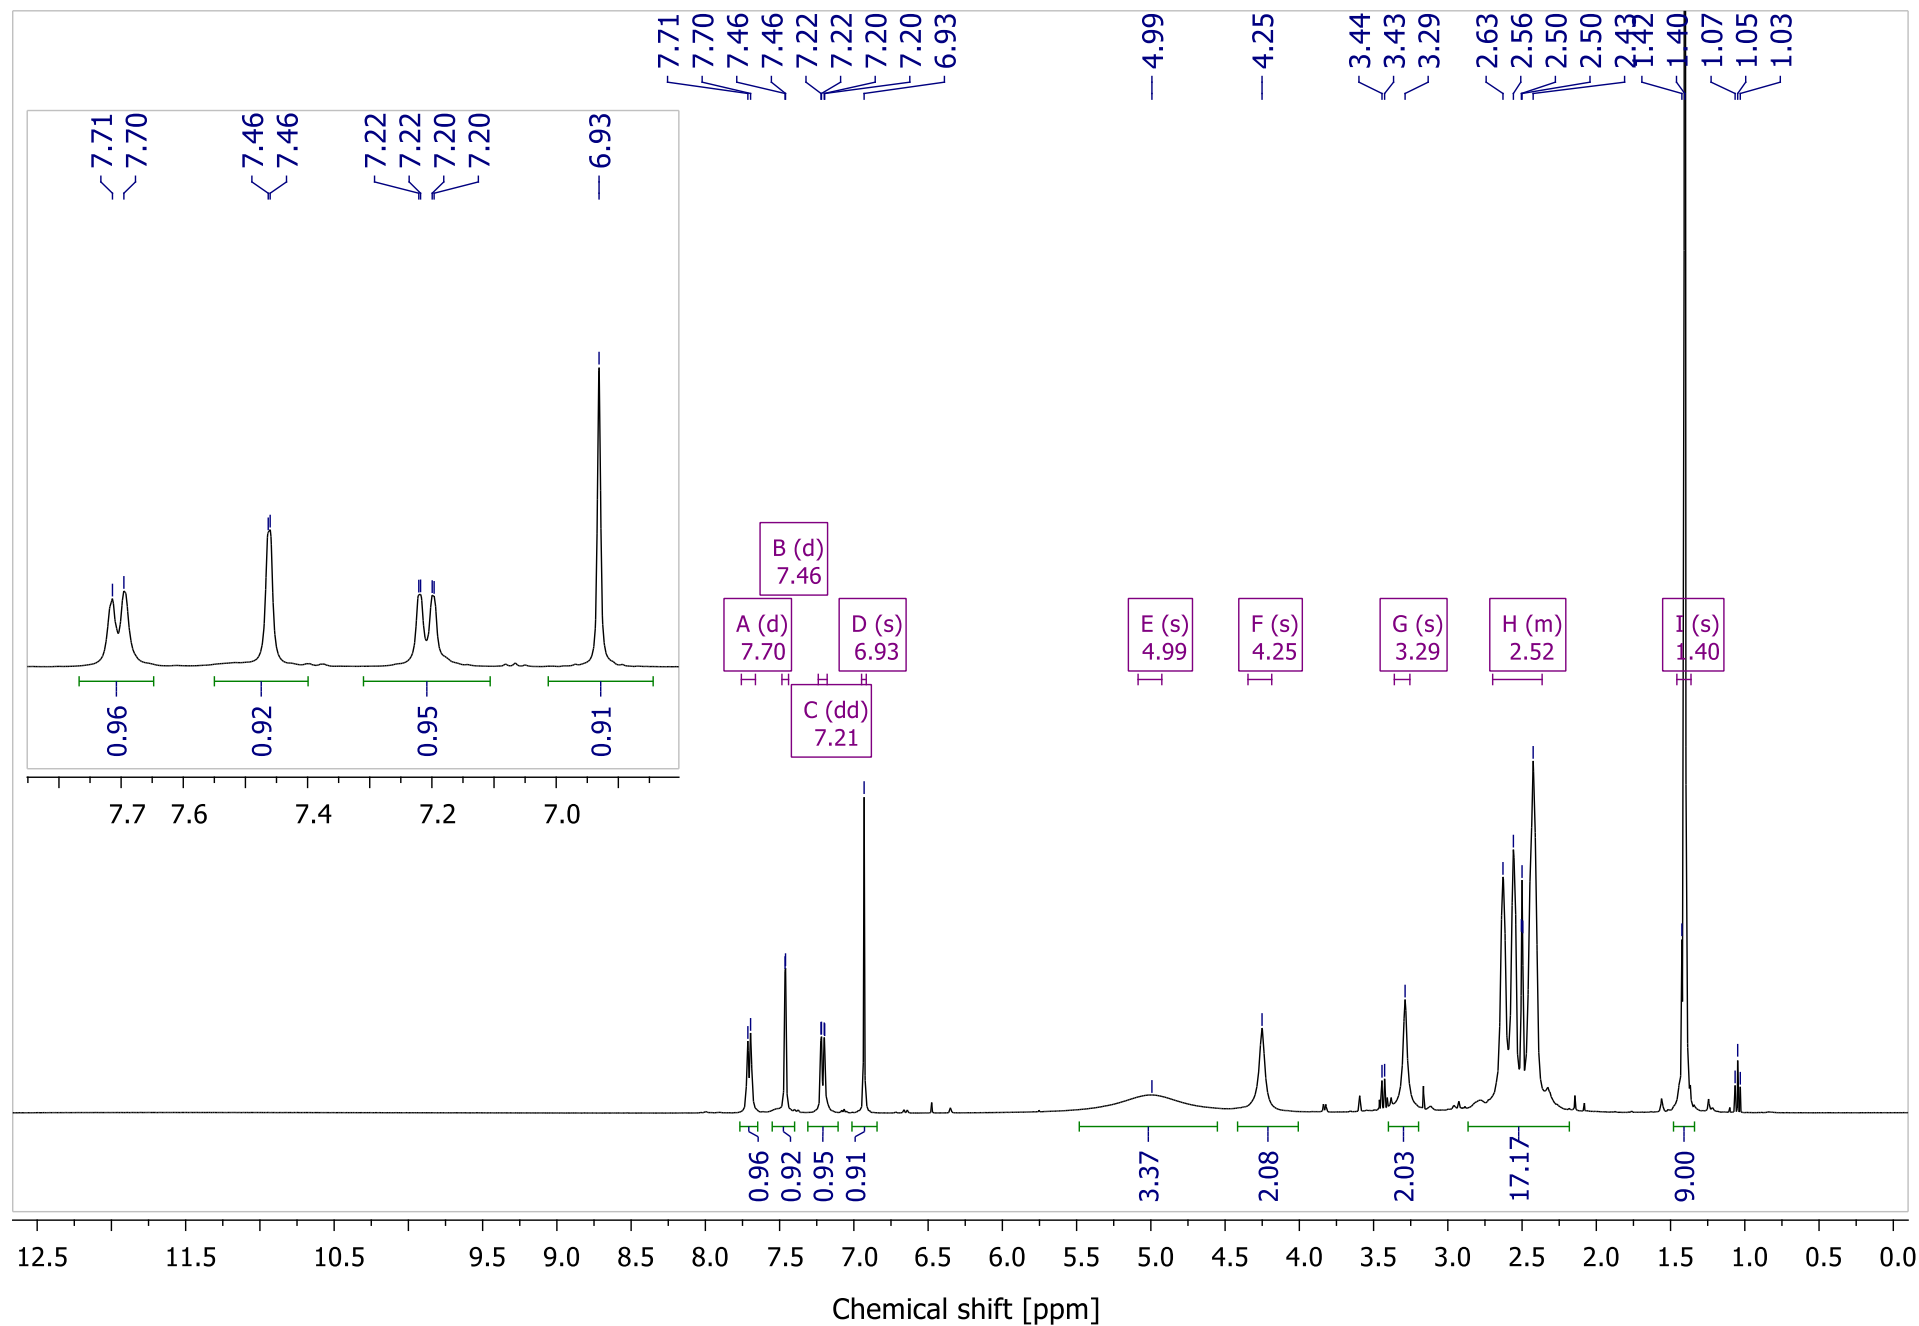

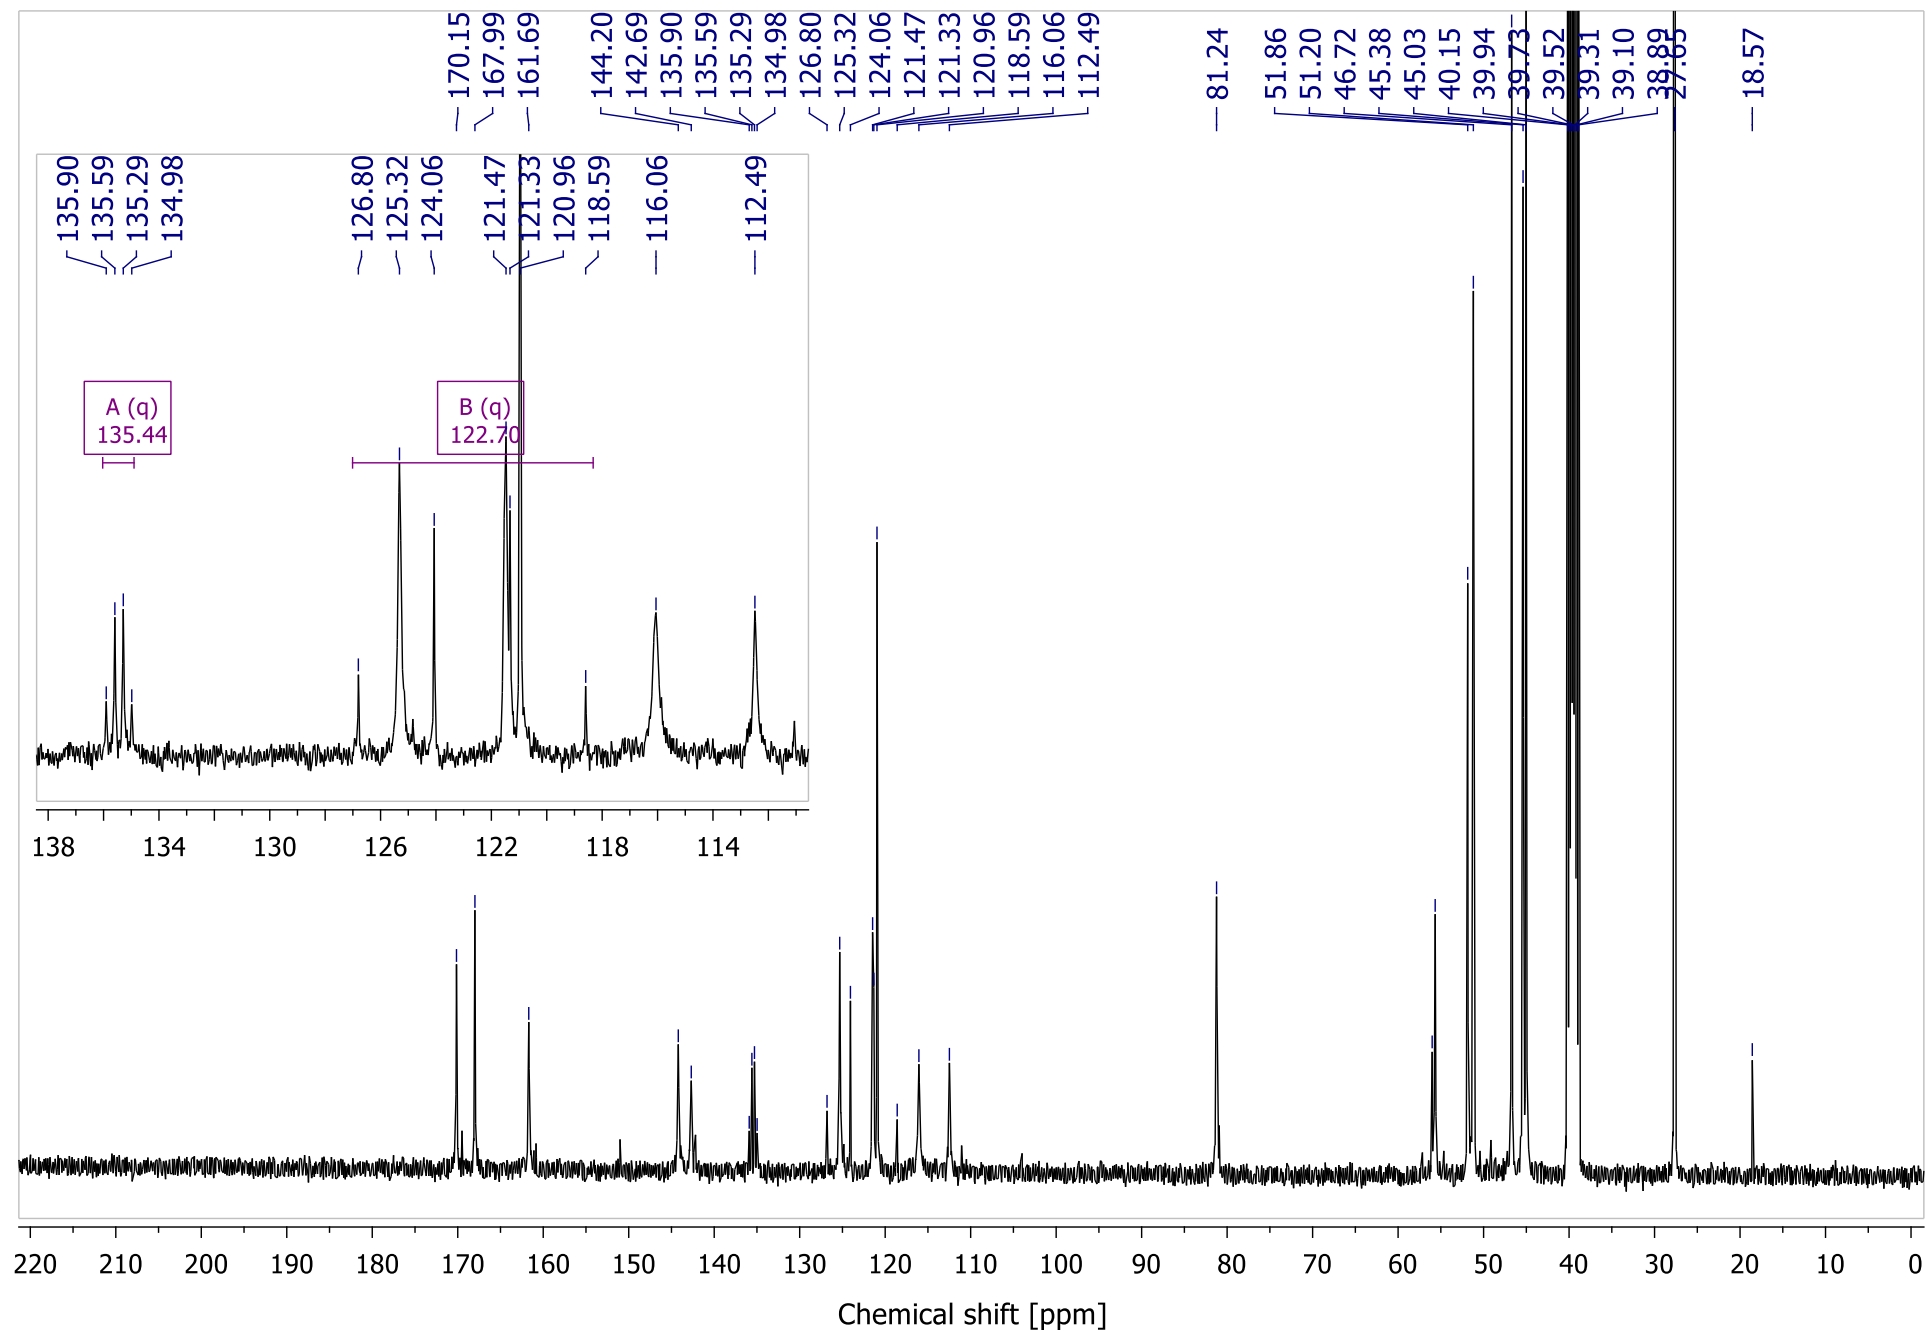

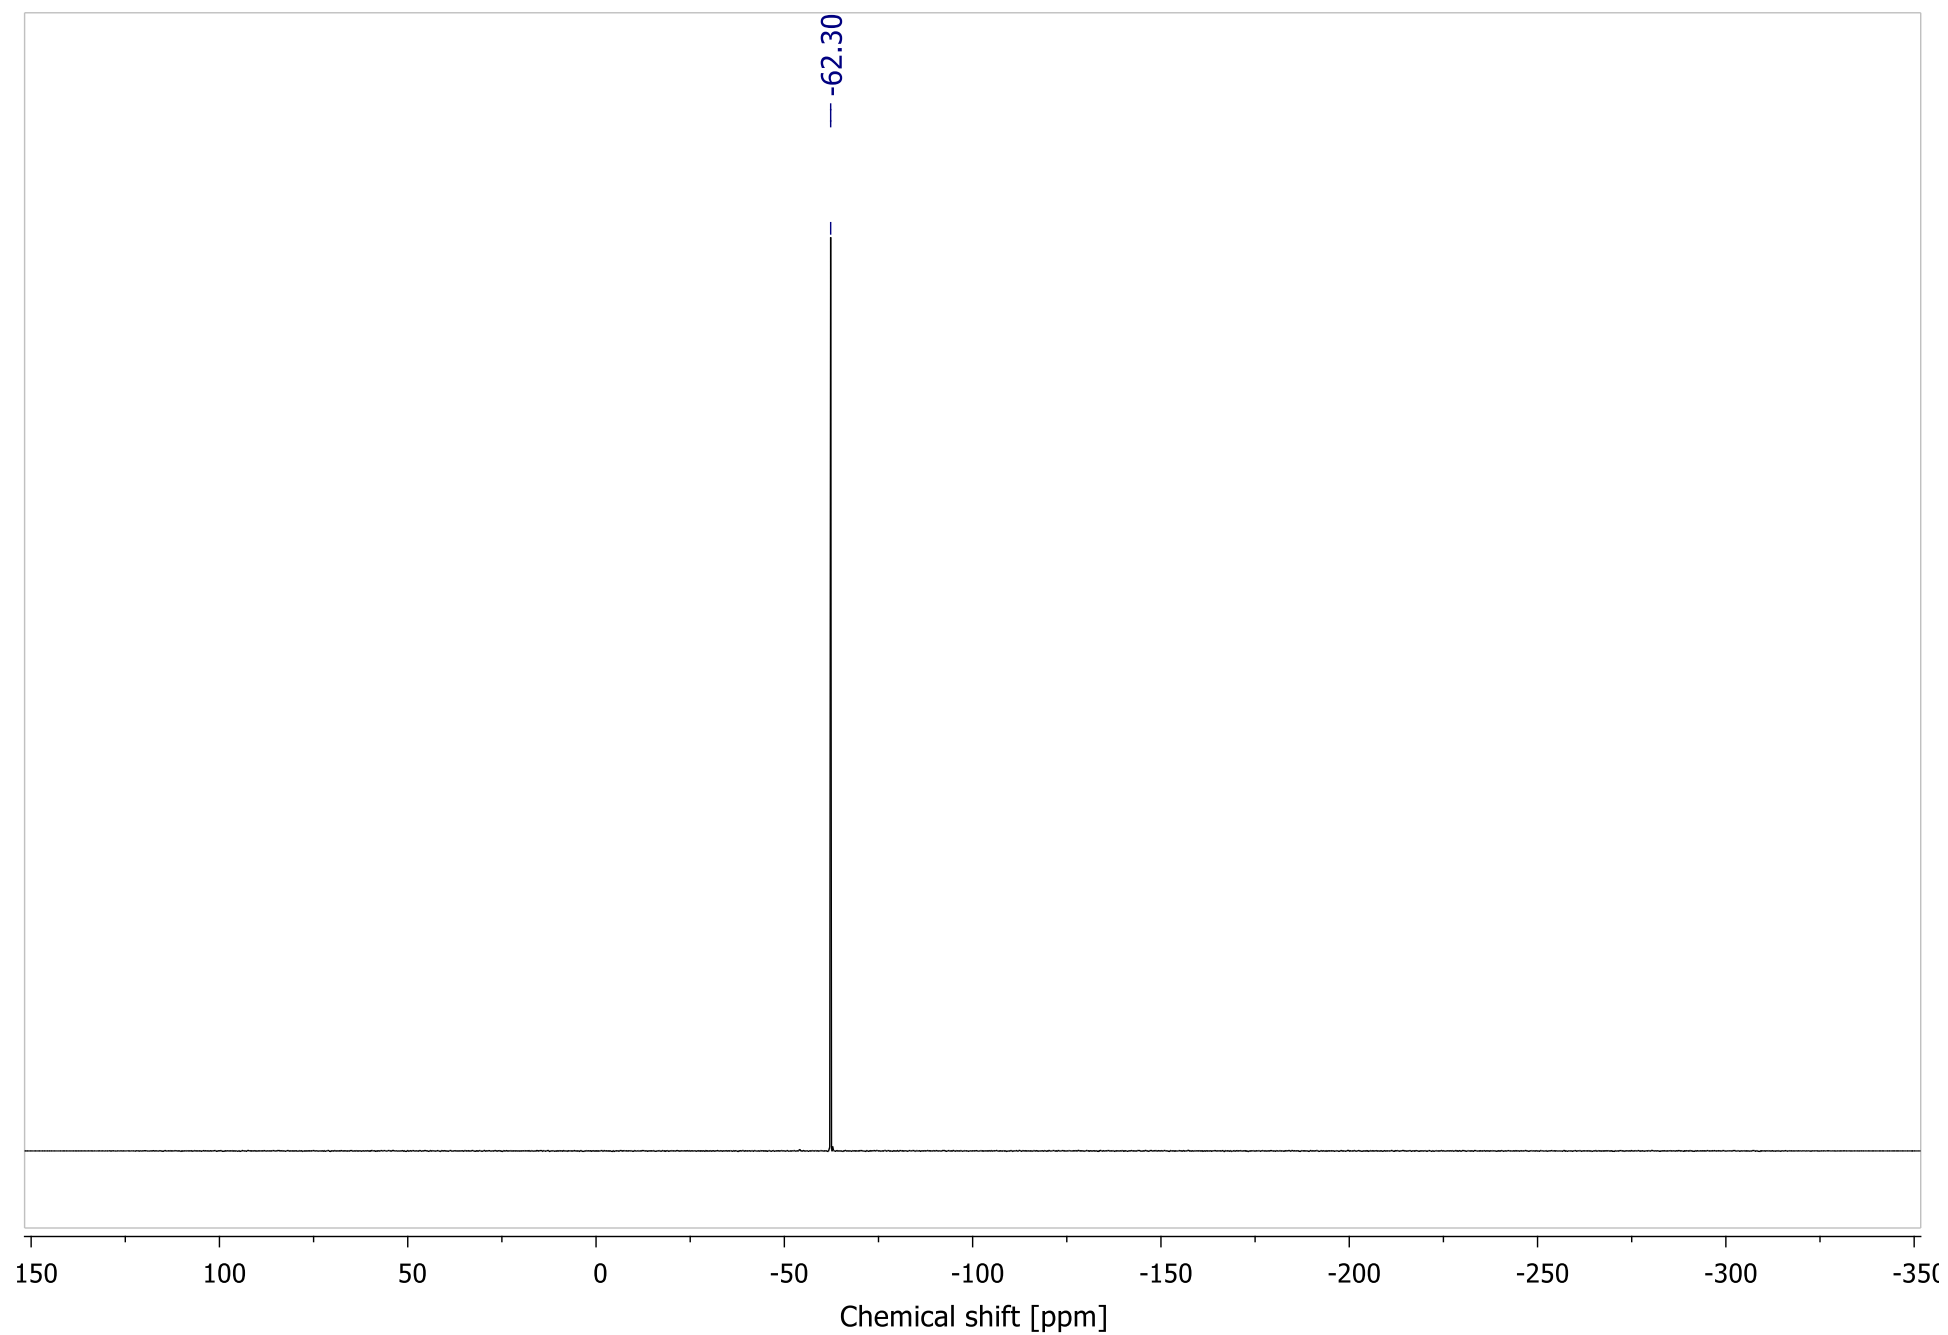

# DKS57\_065A

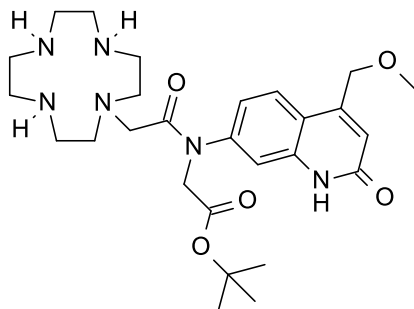

Formula Weight : 530.66(2)

Exact Mass : 530.32167

Formula :  $C_{27}H_{42}N_6O_5$

Composition : C 61.11% H 7.98% N 15.84% O 15.08%

C:\xcalibur\...\DKS57\_065A\_1050\_5um

2/7/2018 1:31:11 PM

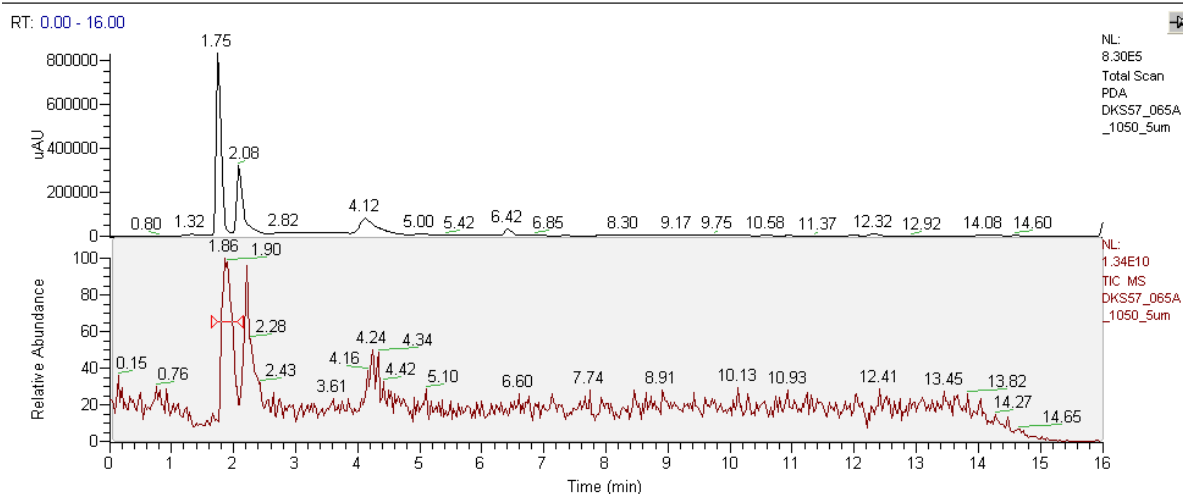

DKS57\_065A\_1050\_5um #105 RT: 1.75 AV: 1 NL: 2.77E6 microAU

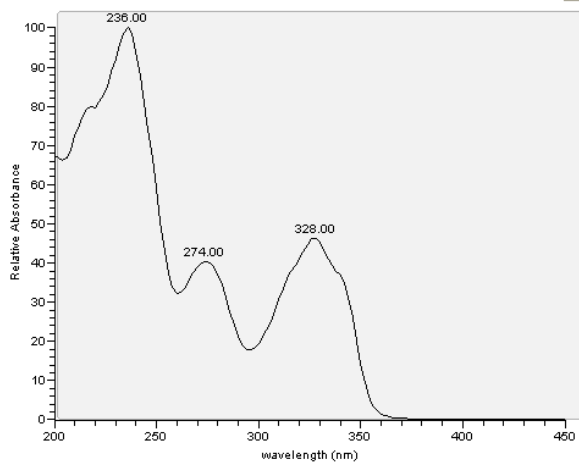

DKS57\_065A\_1050\_5um #65-78 RT: 1.73-2.05 AV: 14 NL: 3.41E9

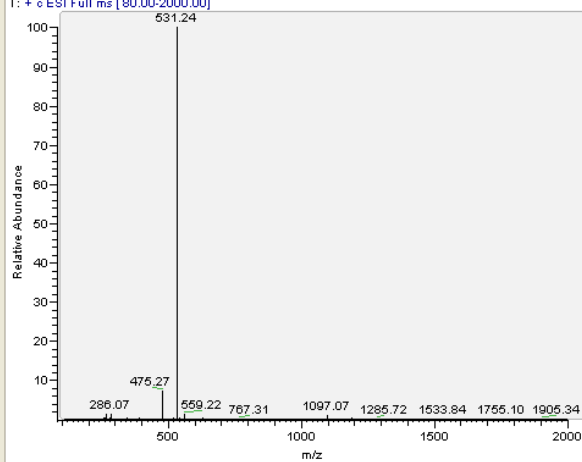

RT: 0.00 - 16.00

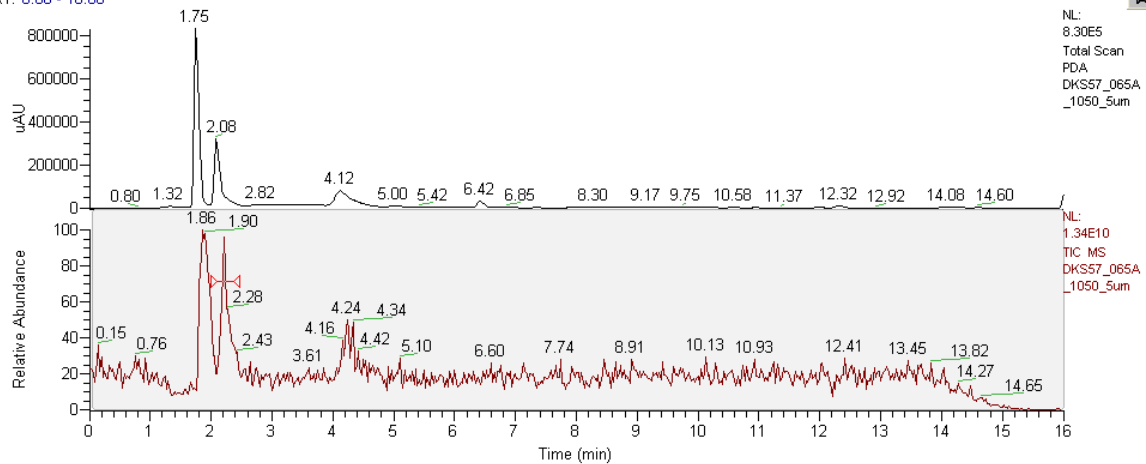

DKS57\_065A\_1050\_5um #125 RT: 2.08 AV: 1 NL: 1.50E5 microAU

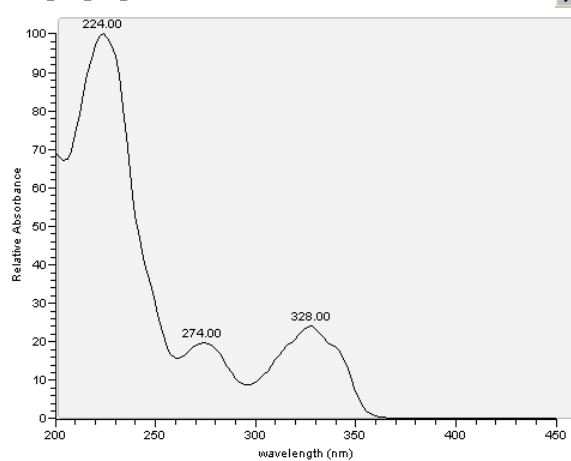

DKS57\_065A\_1050\_5um #79-90 RT: 2.08-2.36 AV: 12 NL: 2.33E9

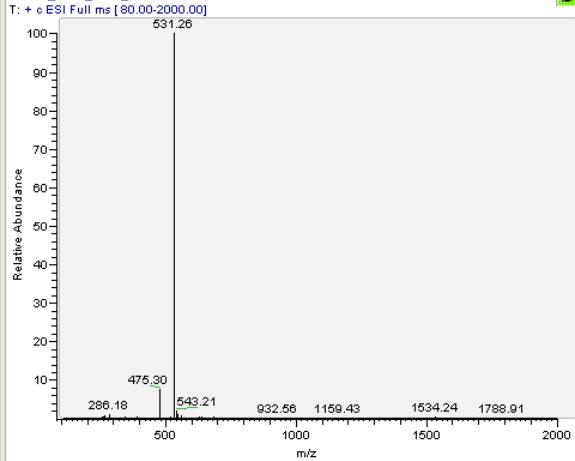

C:\Xcalibur\...DKS57\_065A\_1050\_5um

2/7/2018 1:31:11 PM

RT: 0.00 - 16.00

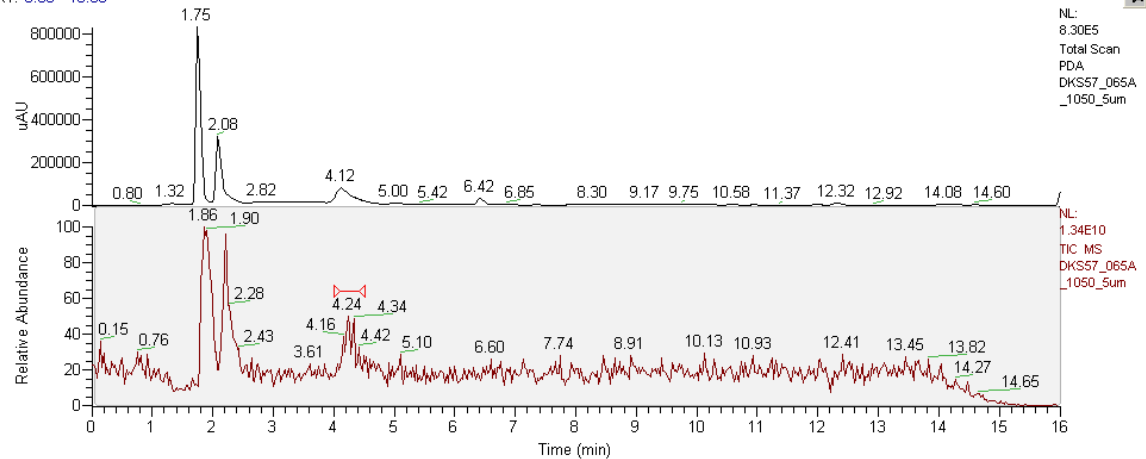

DKS57\_065A\_1050\_5um #247 RT: 4.12 AV: 1 NL: 3.87E5 microAU

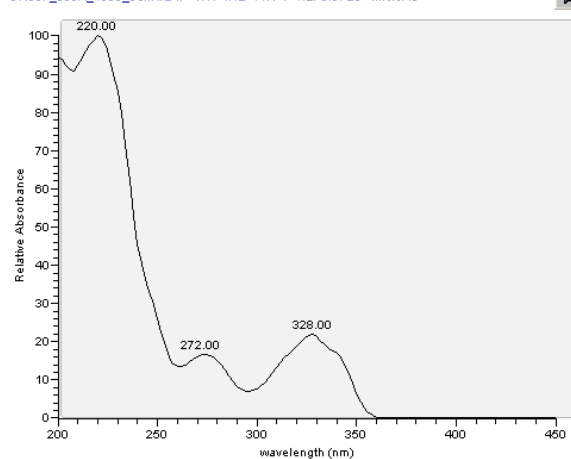

DKS57\_065A\_1050\_5um #156-169 RT: 4.08-4.42 AV: 14 NL: 9.99E8

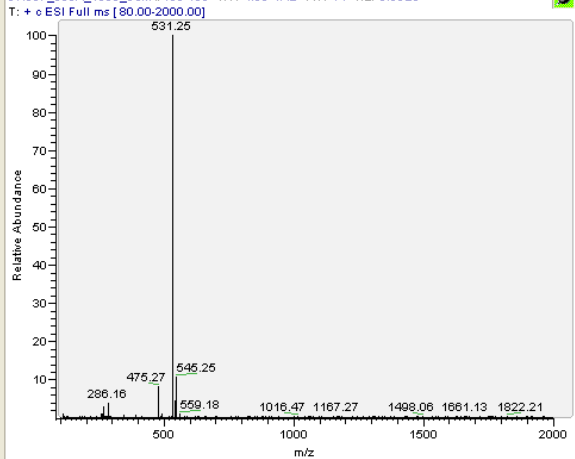





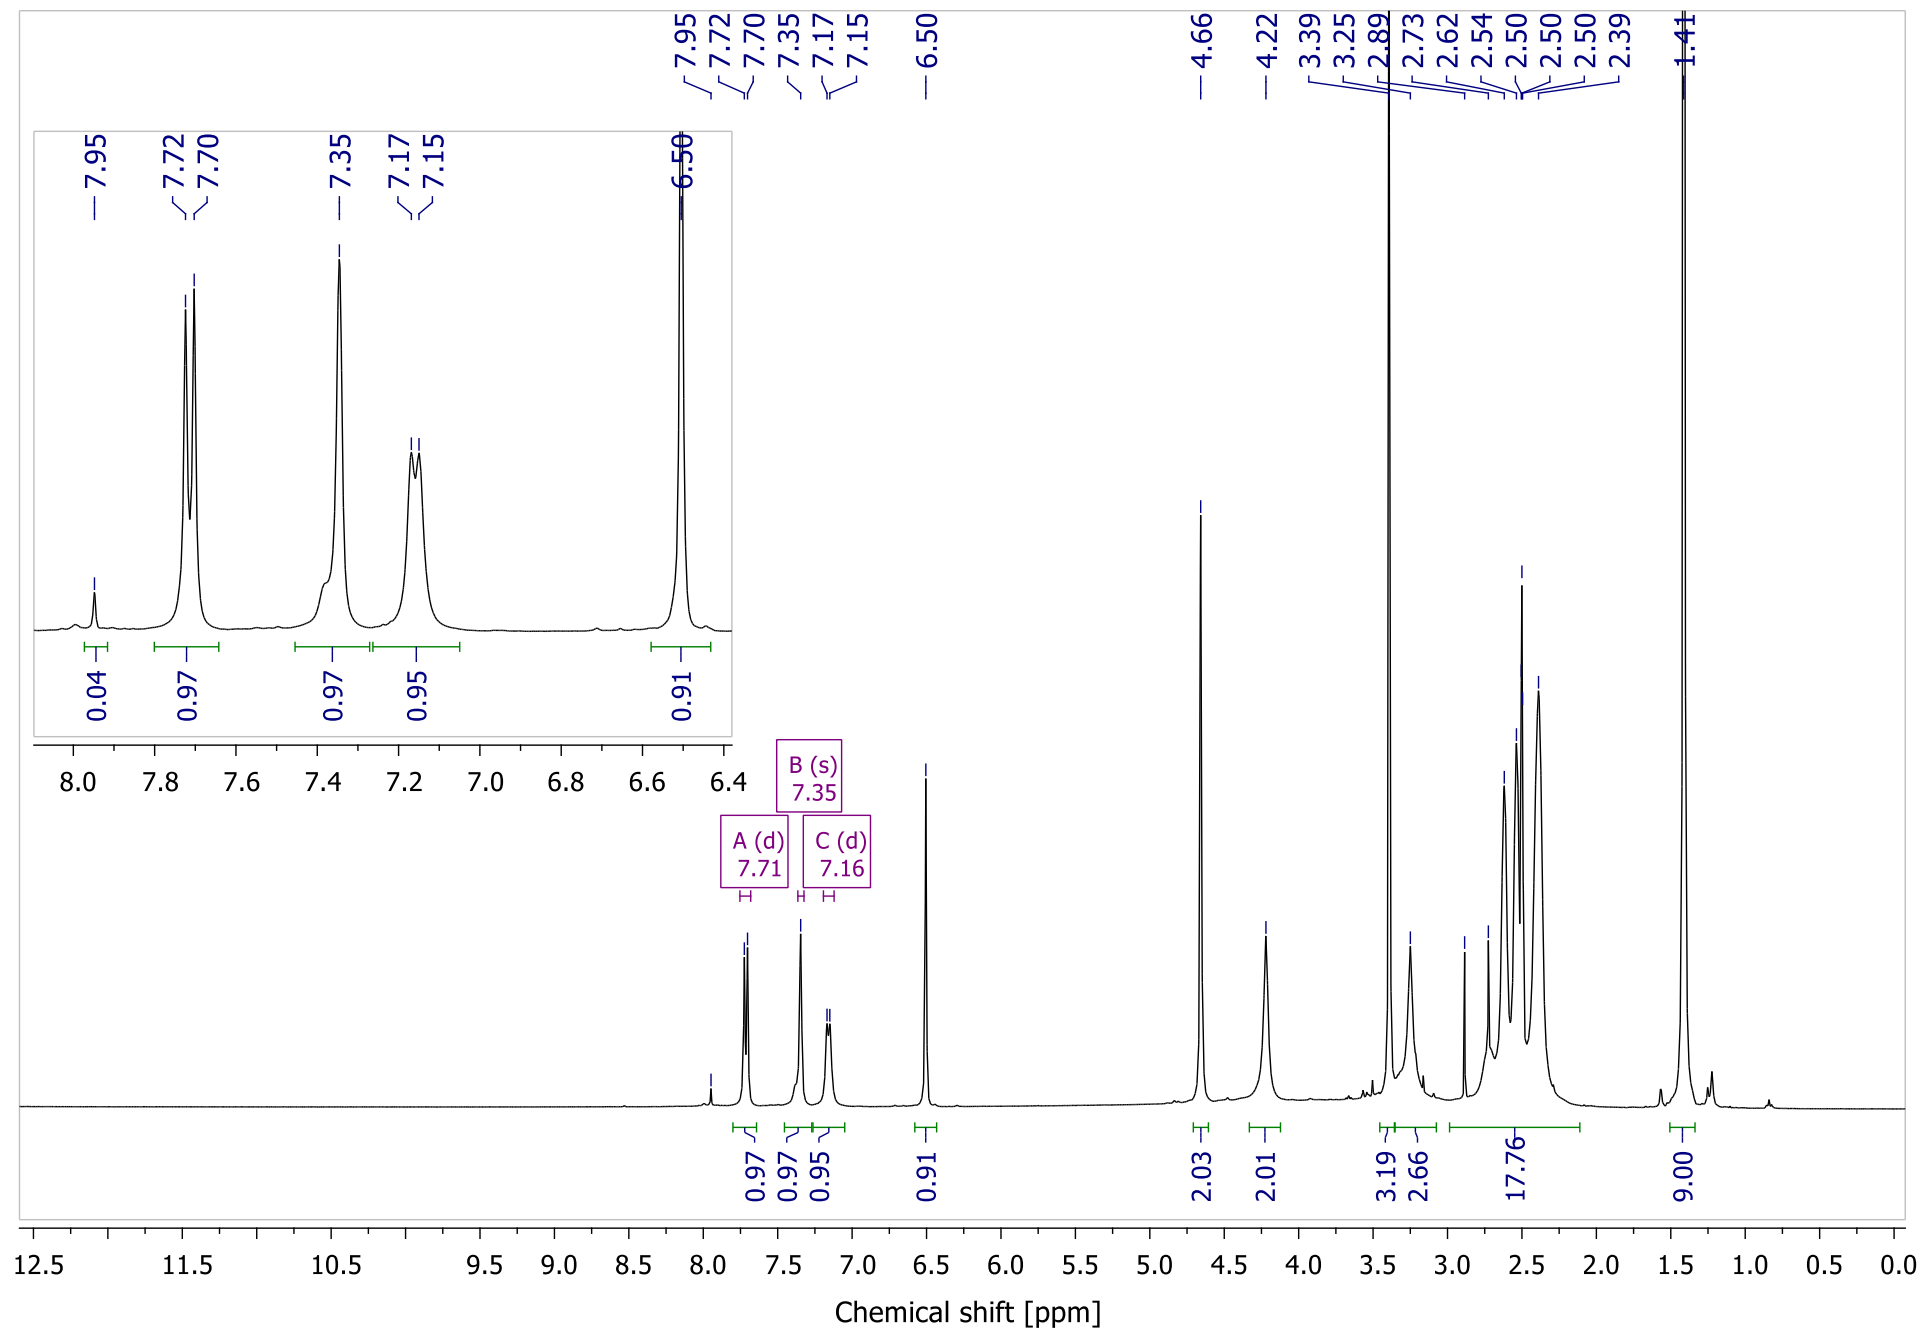

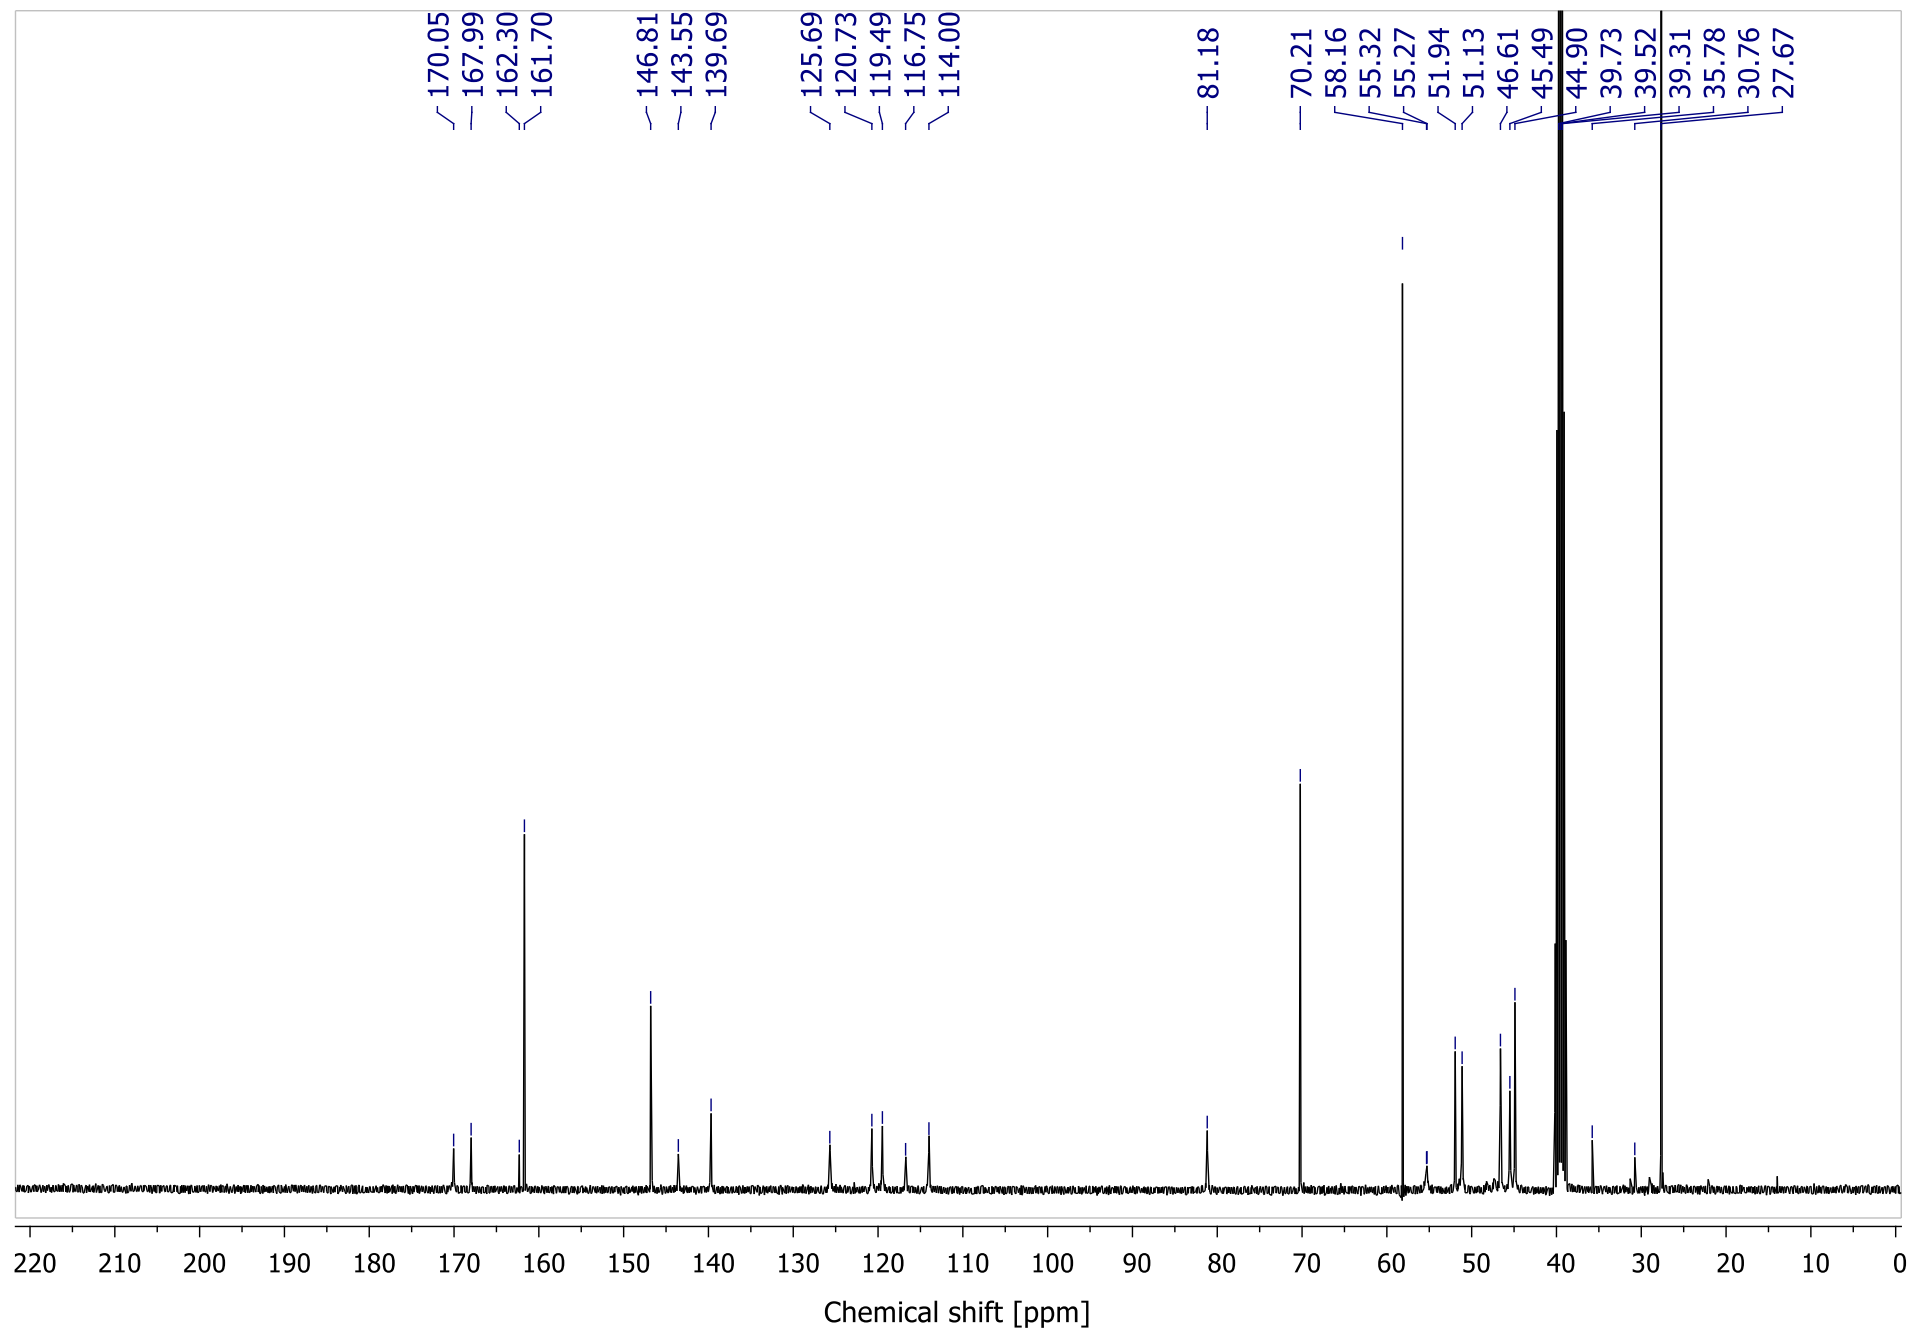

**DKS57\_067A**

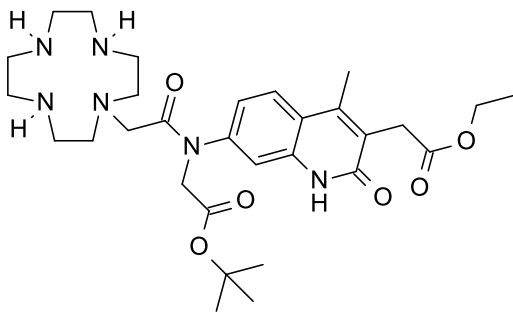

Formula Weight : 586.72(2)

Exact Mass : 586.34788

Formula :  $C_{30}H_{46}N_6O_6$

Composition : C 61.41% H 7.90% N 14.32% O 16.36%

C:\Xcalibur\...\DKS57\_067A\_1050\_5um

2/7/2018 2:04:33 PM

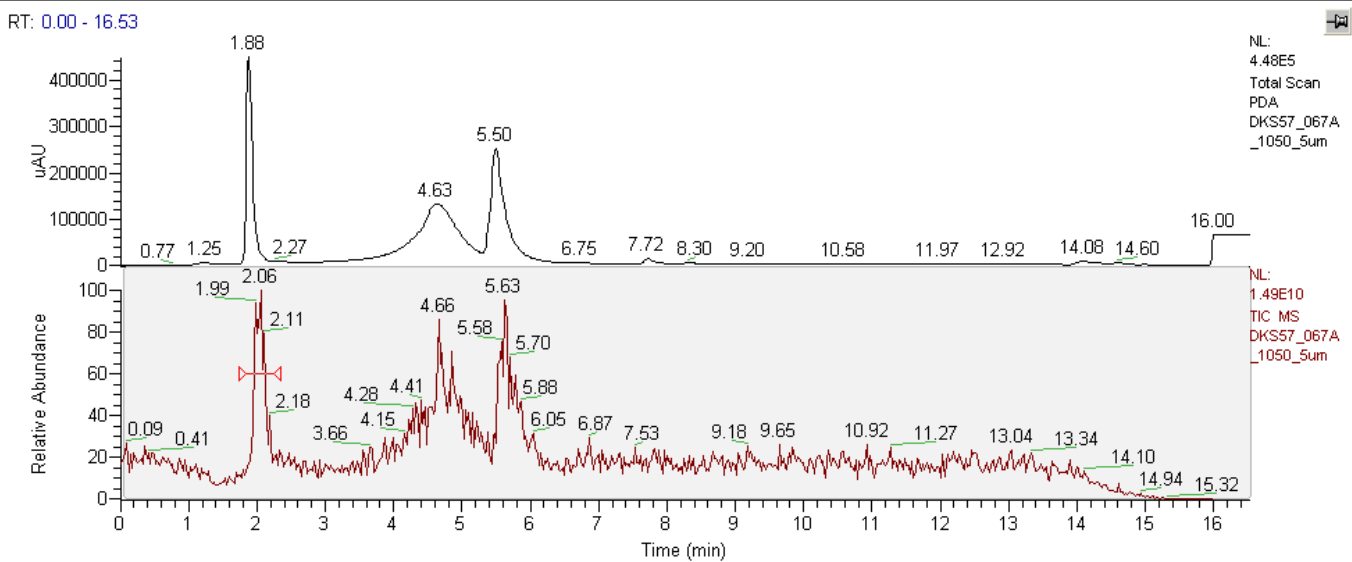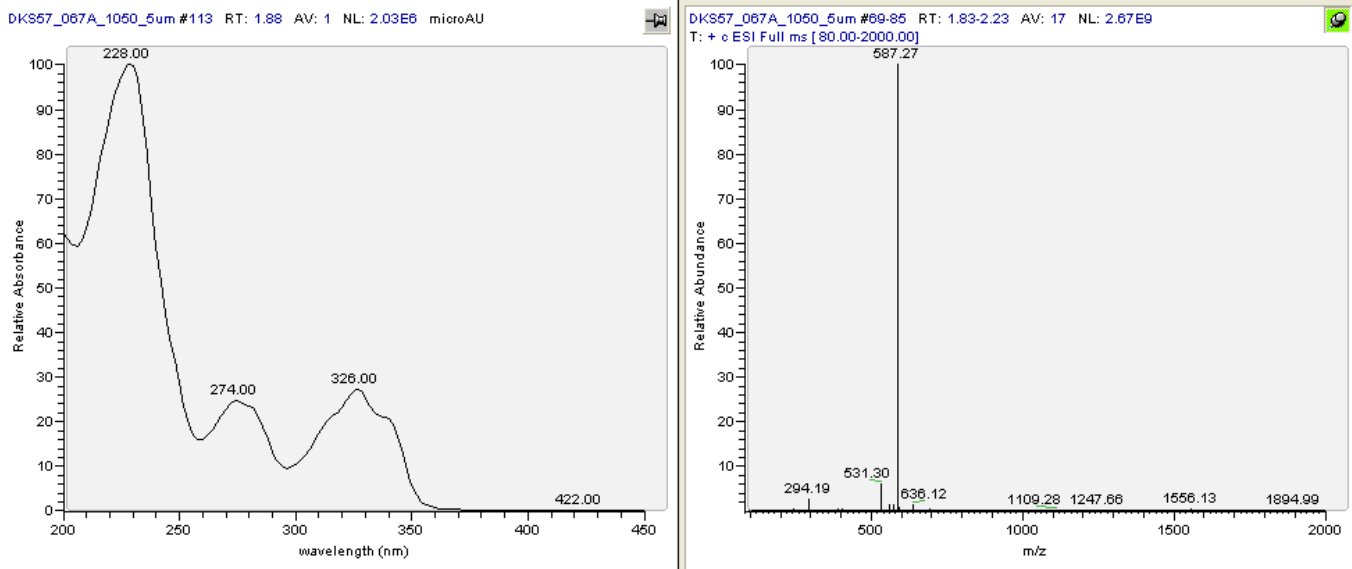

RT: 0.00 - 16.53

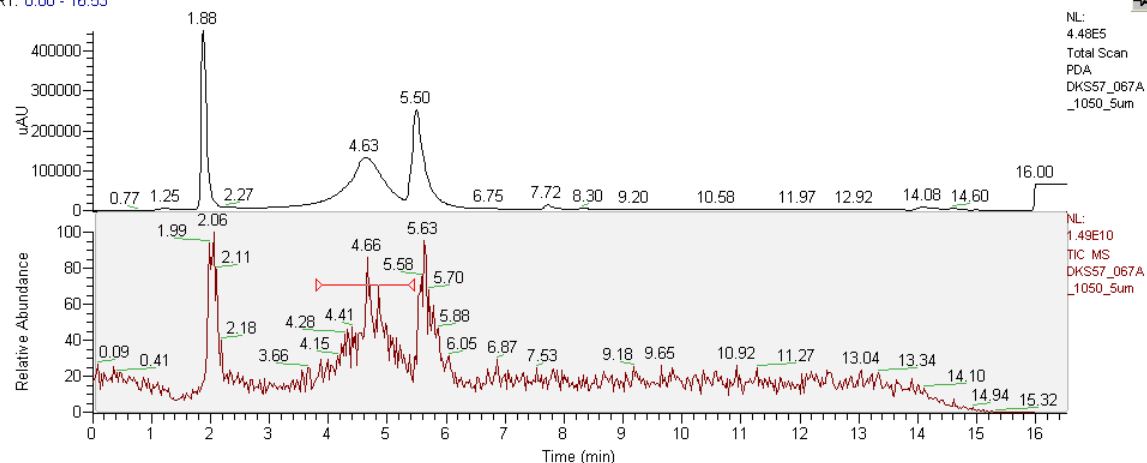

DKS57\_067A\_1050\_5um #278 RT: 4.63 AV: 1 NL: 6.40E5 microAU

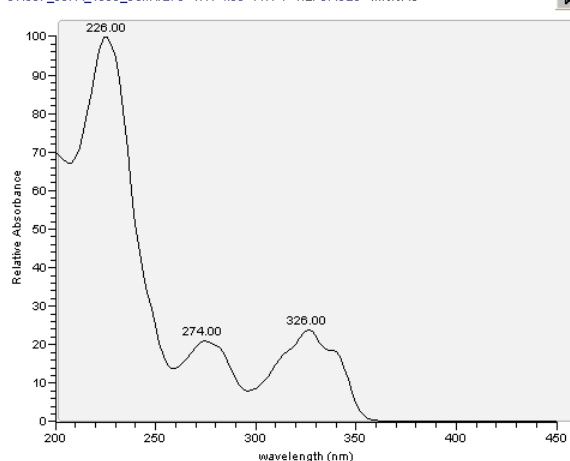DKS57\_067A\_1050\_5um #148-206 RT: 3.89-5.35 AV: 59 NL: 1.85E9  
T: + e ESI Full ms [80.00-2000.00]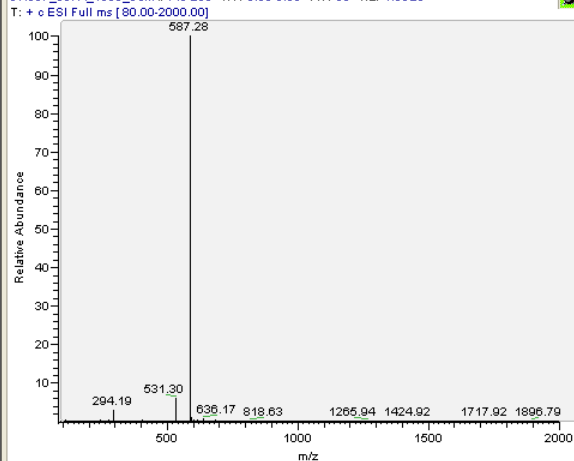

RT: 0.00 - 16.53

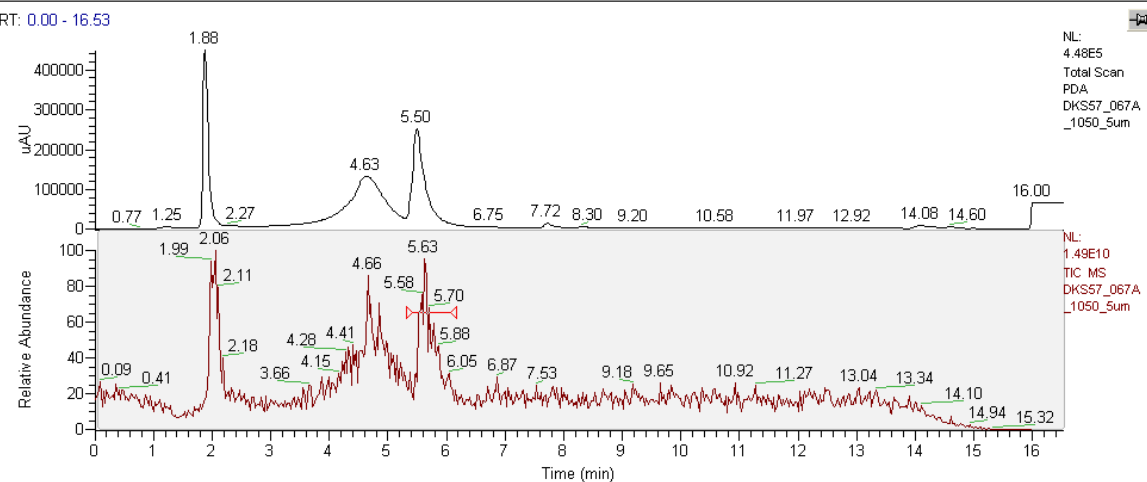

DKS57\_067A\_1050\_5um #330 RT: 5.50 AV: 1 NL: 1.22E6 microAU

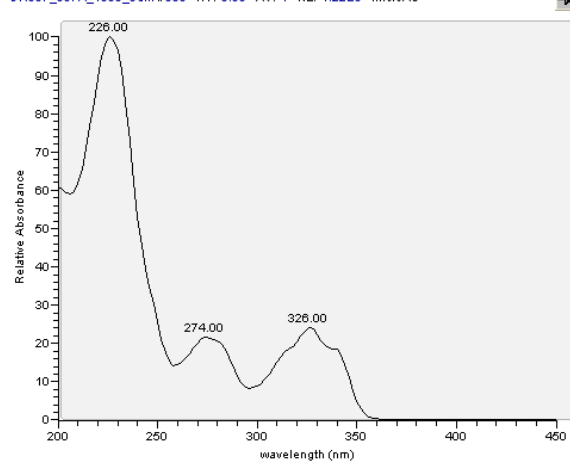DKS57\_067A\_1050\_5um #208-234 RT: 5.41-6.05 AV: 27 NL: 2.52E9  
T: + e ESI Full ms [80.00-2000.00]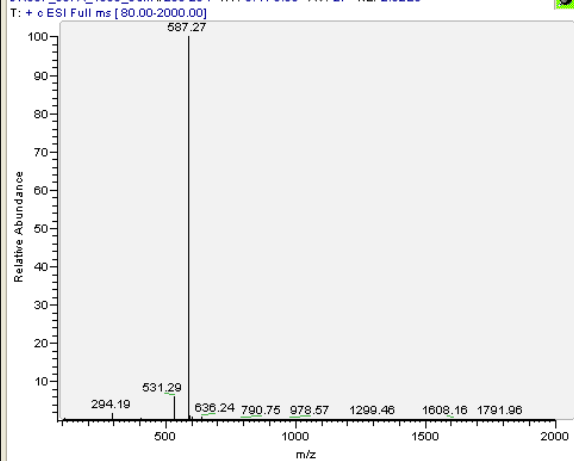

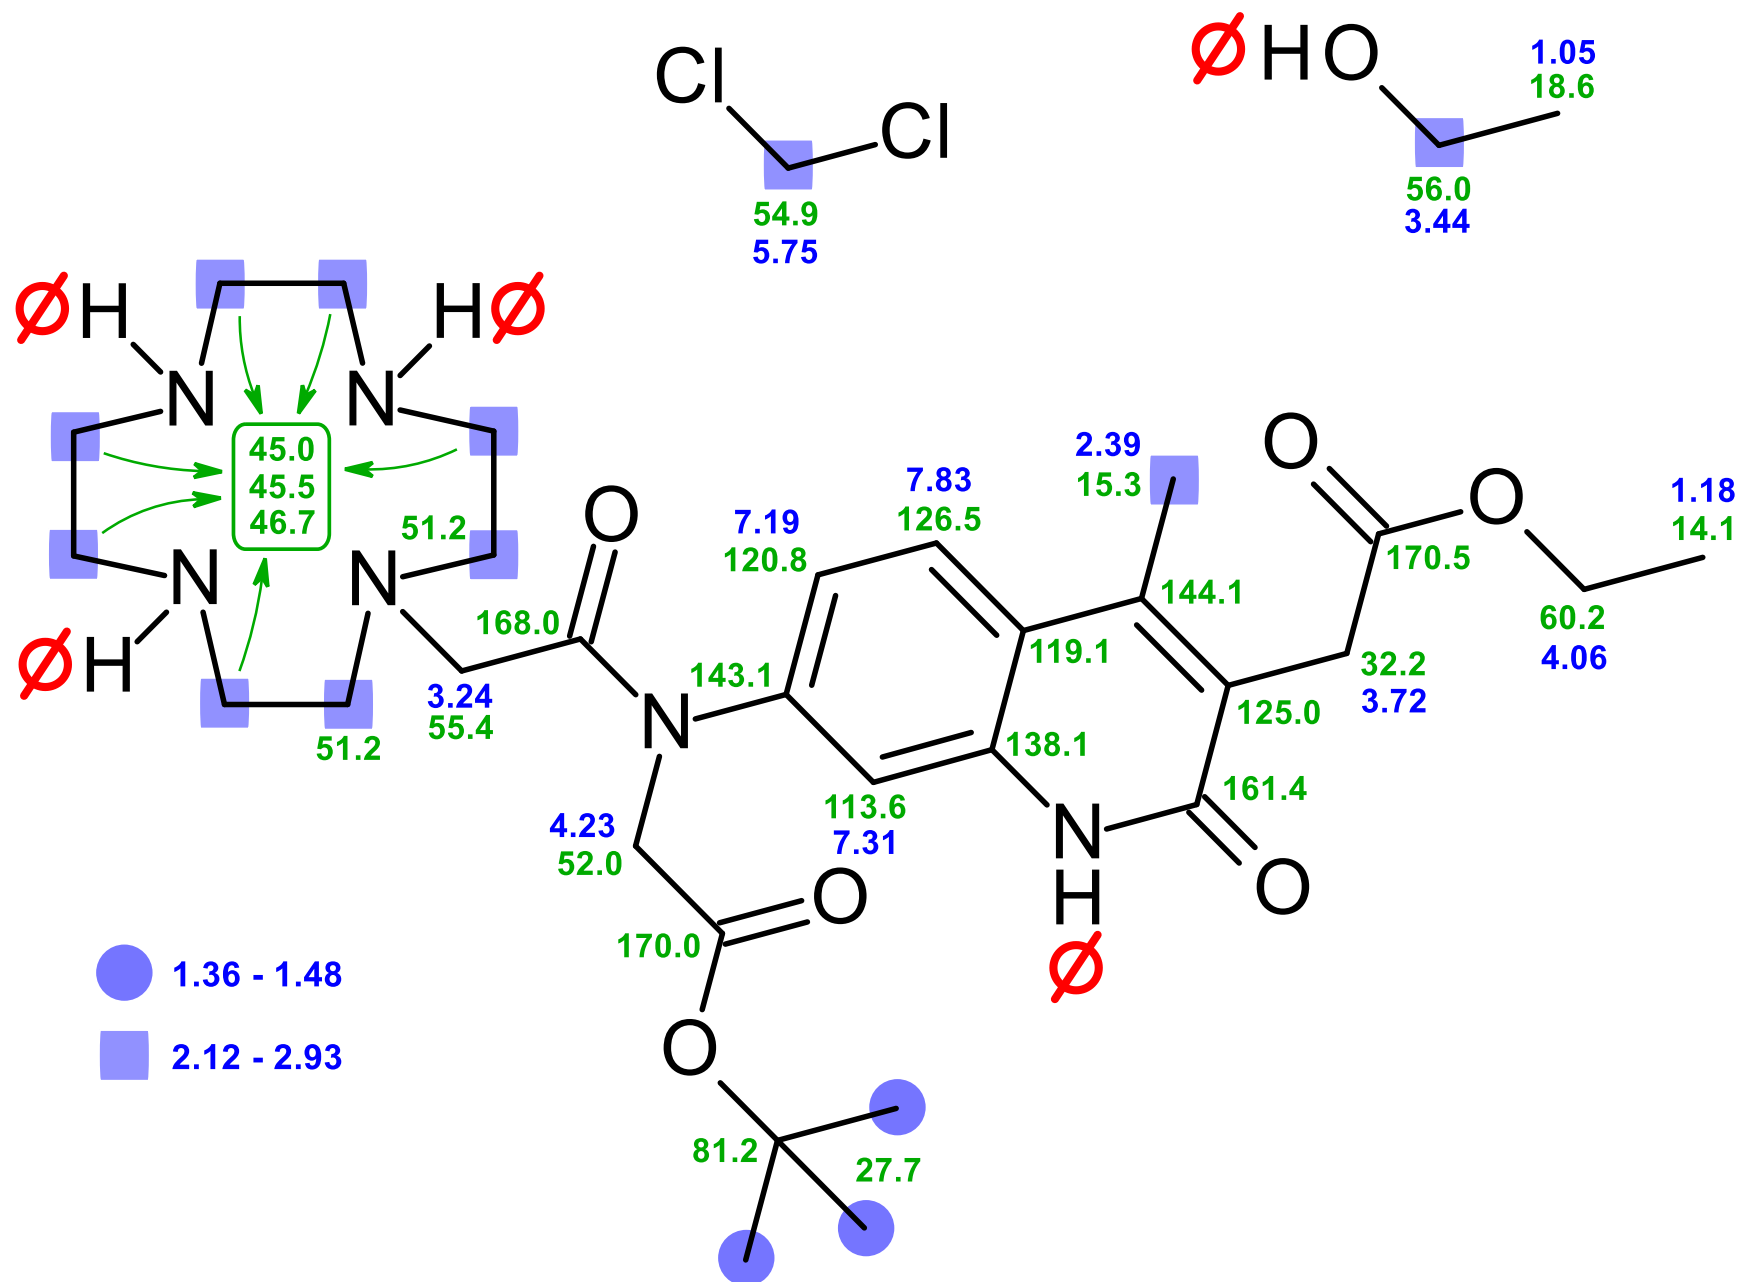

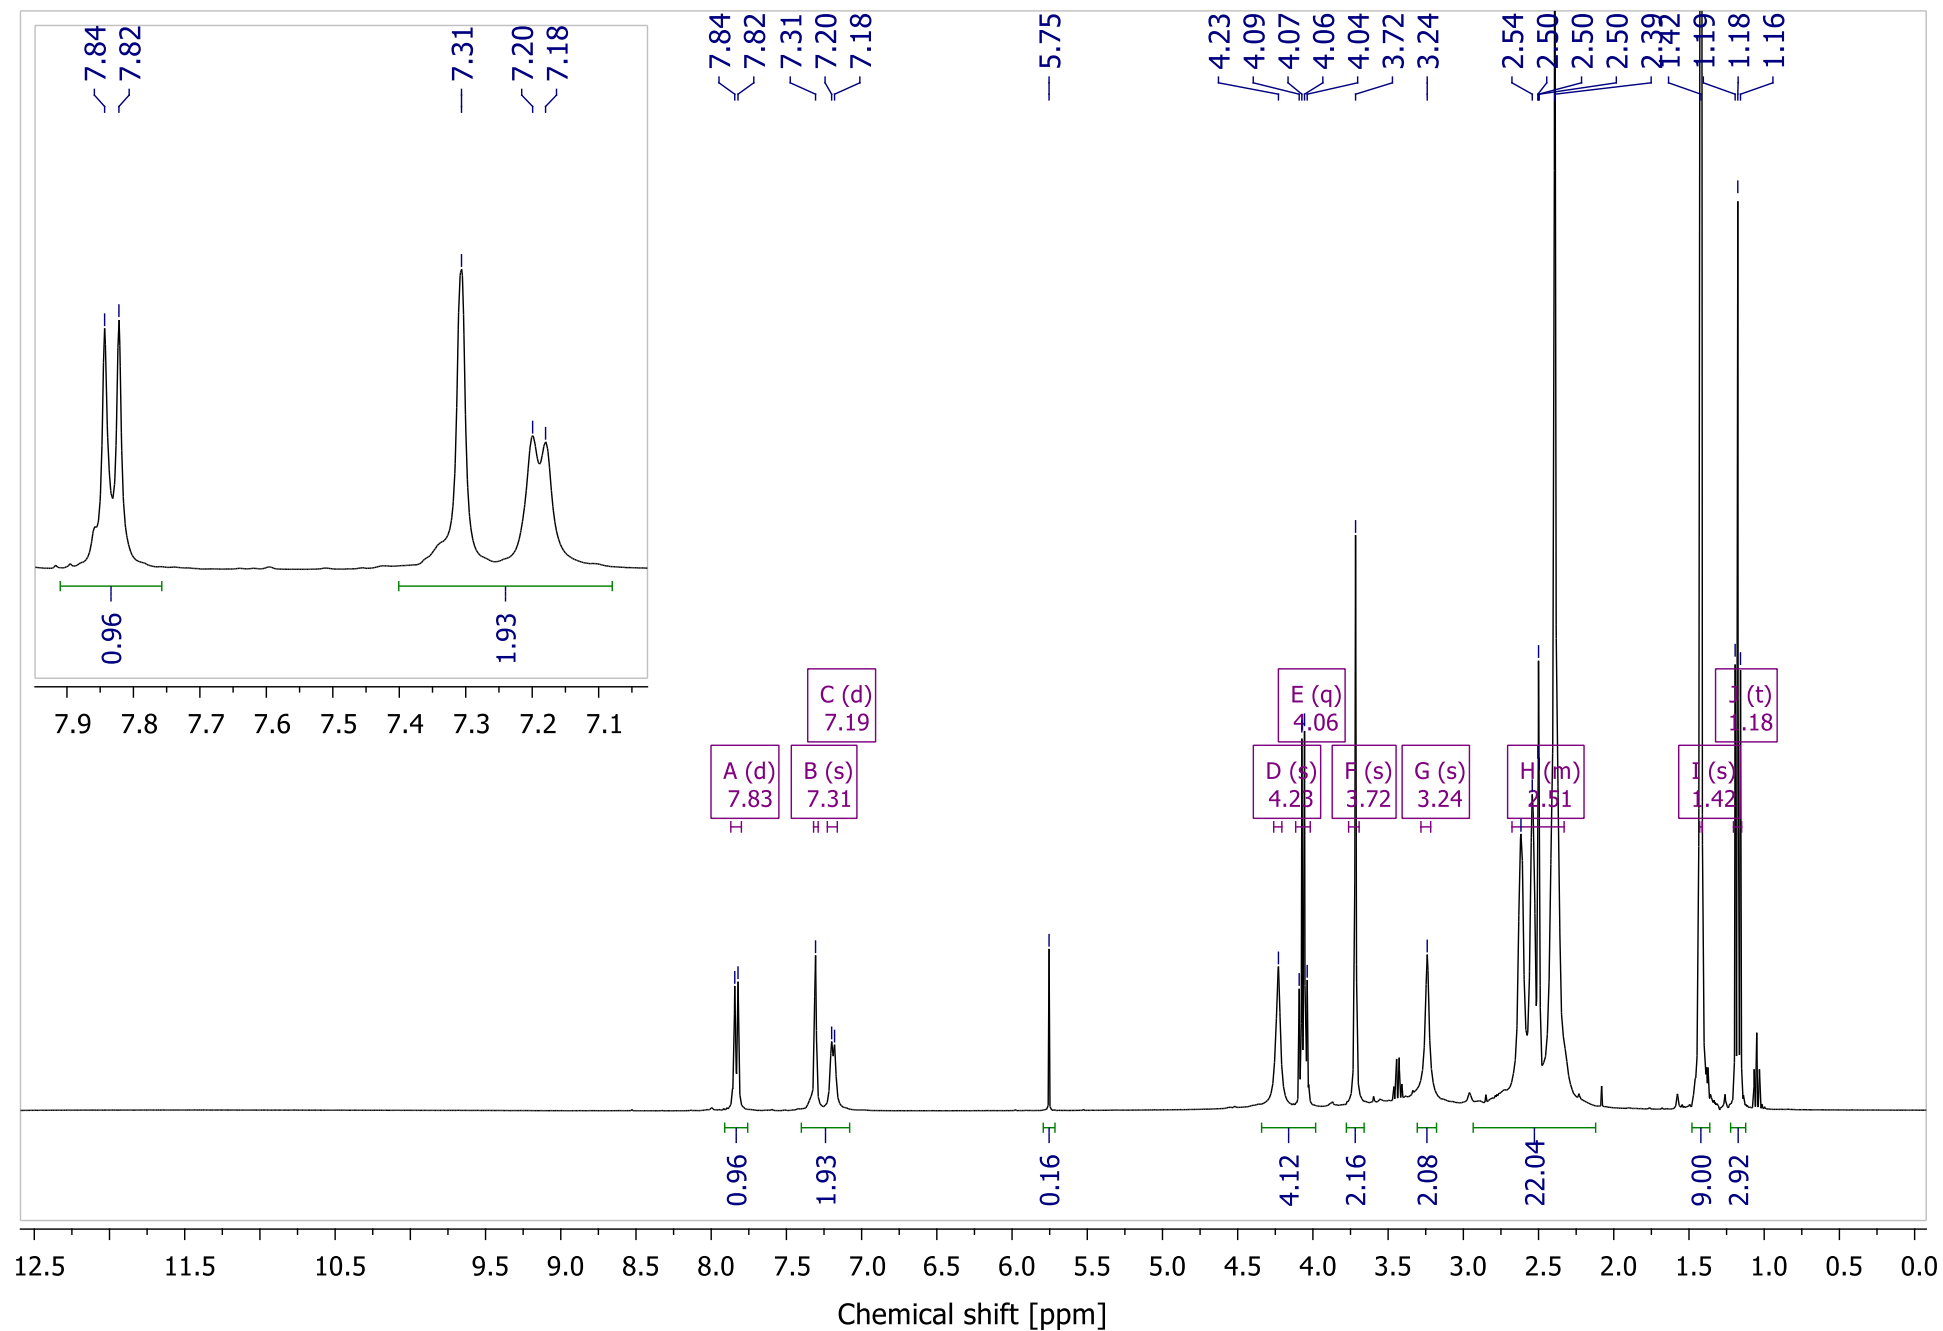

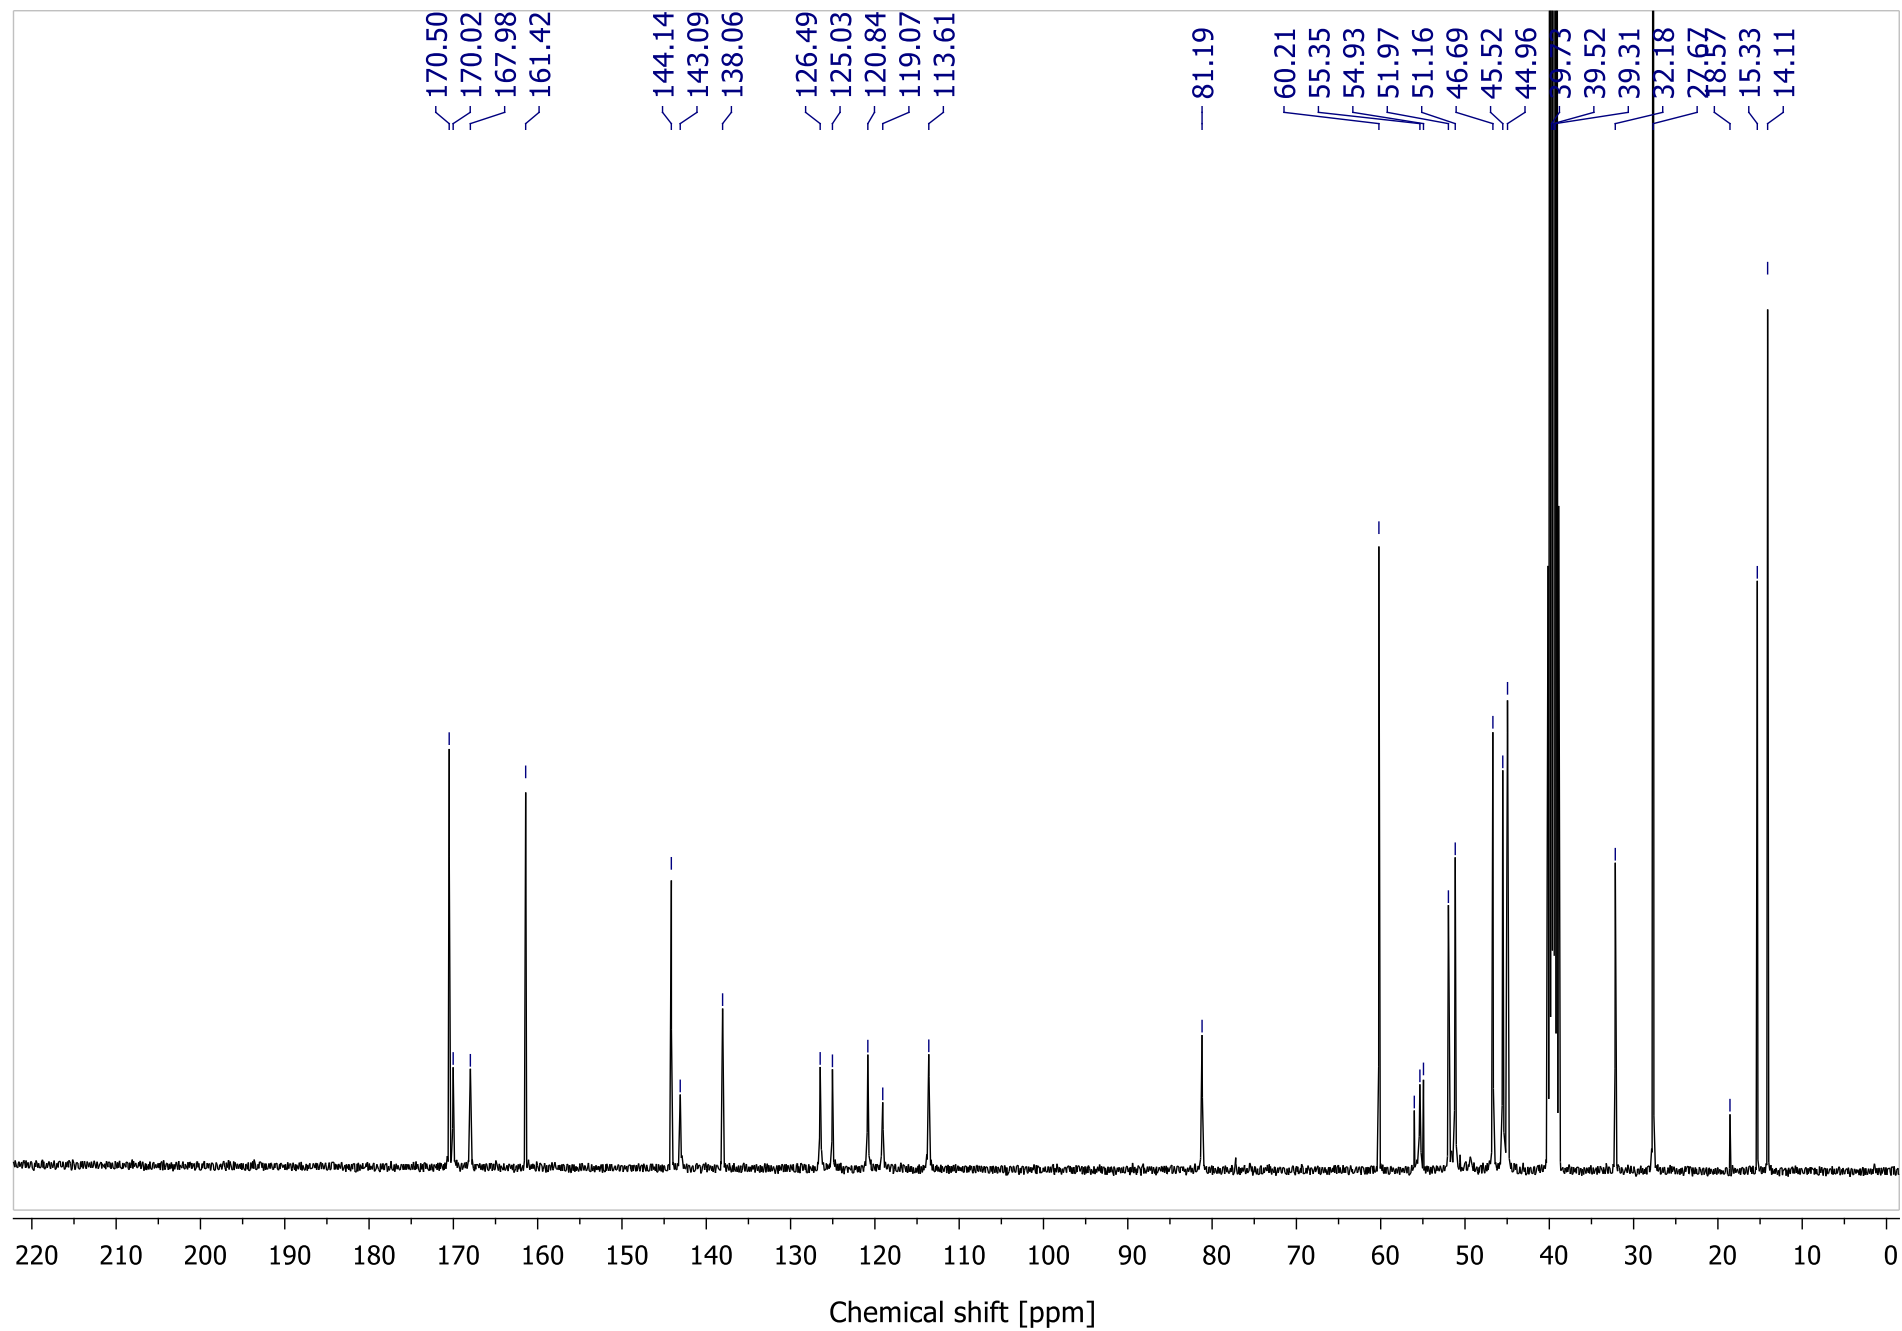

# DKS57\_071A

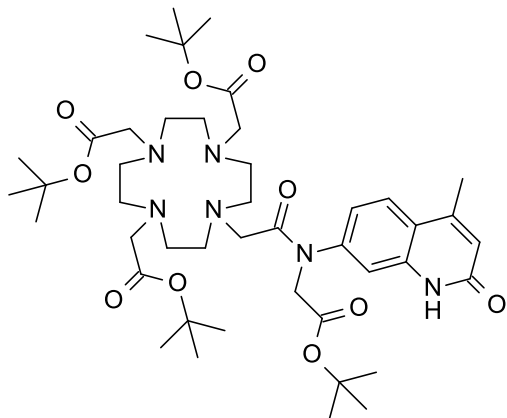

Formula Weight : 843.06(4)

Exact Mass : 842.51534

Formula :  $C_{44}H_{70}N_6O_{10}$

Composition : C 62.68% H 8.37% N 9.97% O 18.98%

DKS57\_071A\_1090\_5um\_180309144440

3/9/2018 2:44:40 PM

RT: 0.00 - 10.00

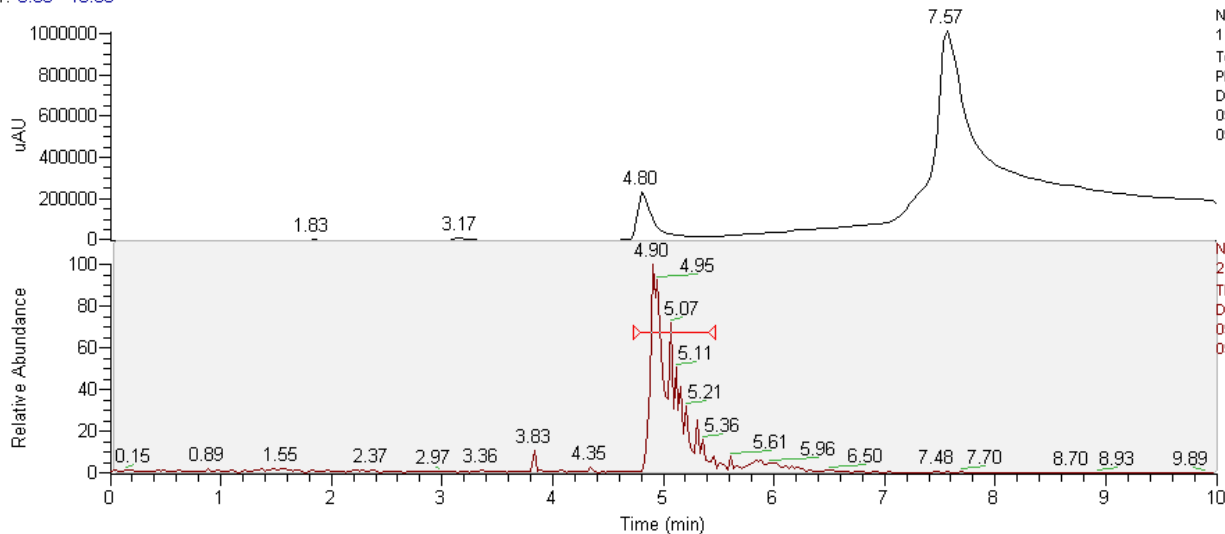

NL:  
1.01E6  
Total Scan  
PDA  
DKS57\_071A\_1  
090\_5um\_1803  
09144440

NL:  
2.80E10  
TIC MS  
DKS57\_071A\_1  
090\_5um\_1803  
09144440

DKS57\_071A\_1090\_5um\_180309144440 #144 RT: 4.80 AV: 1 NL: 7.77E5 microAU

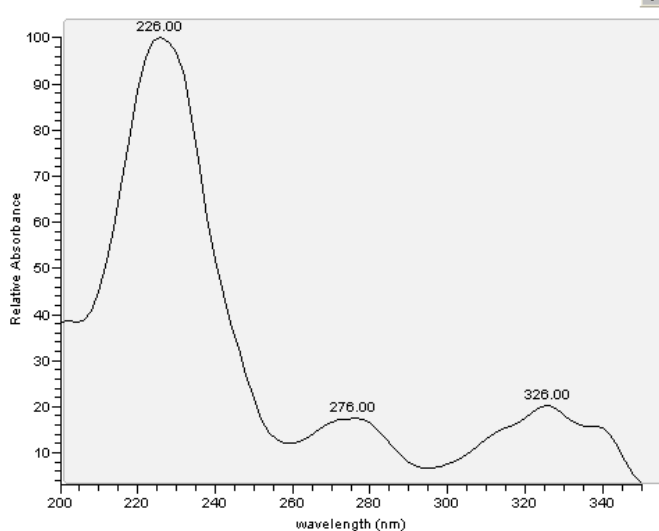

DKS57\_071A\_1090\_5um\_180309144440 #178-204 RT: 4.78-5.41 AV: 27 NL: 4.18E9  
T: + e ESI Full ms [80.00-2000.00]

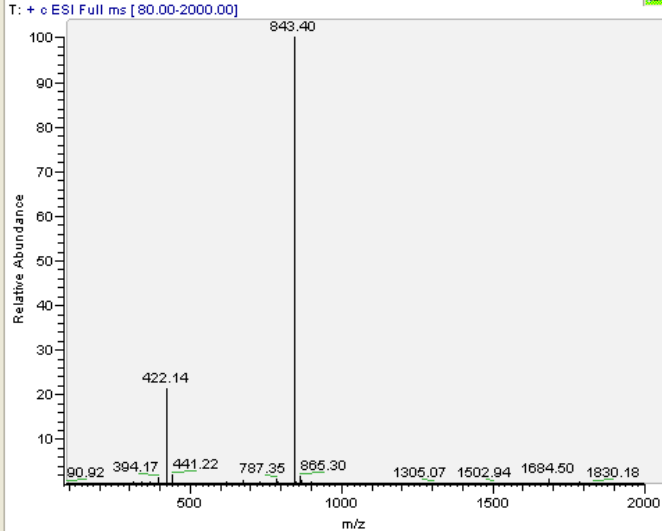





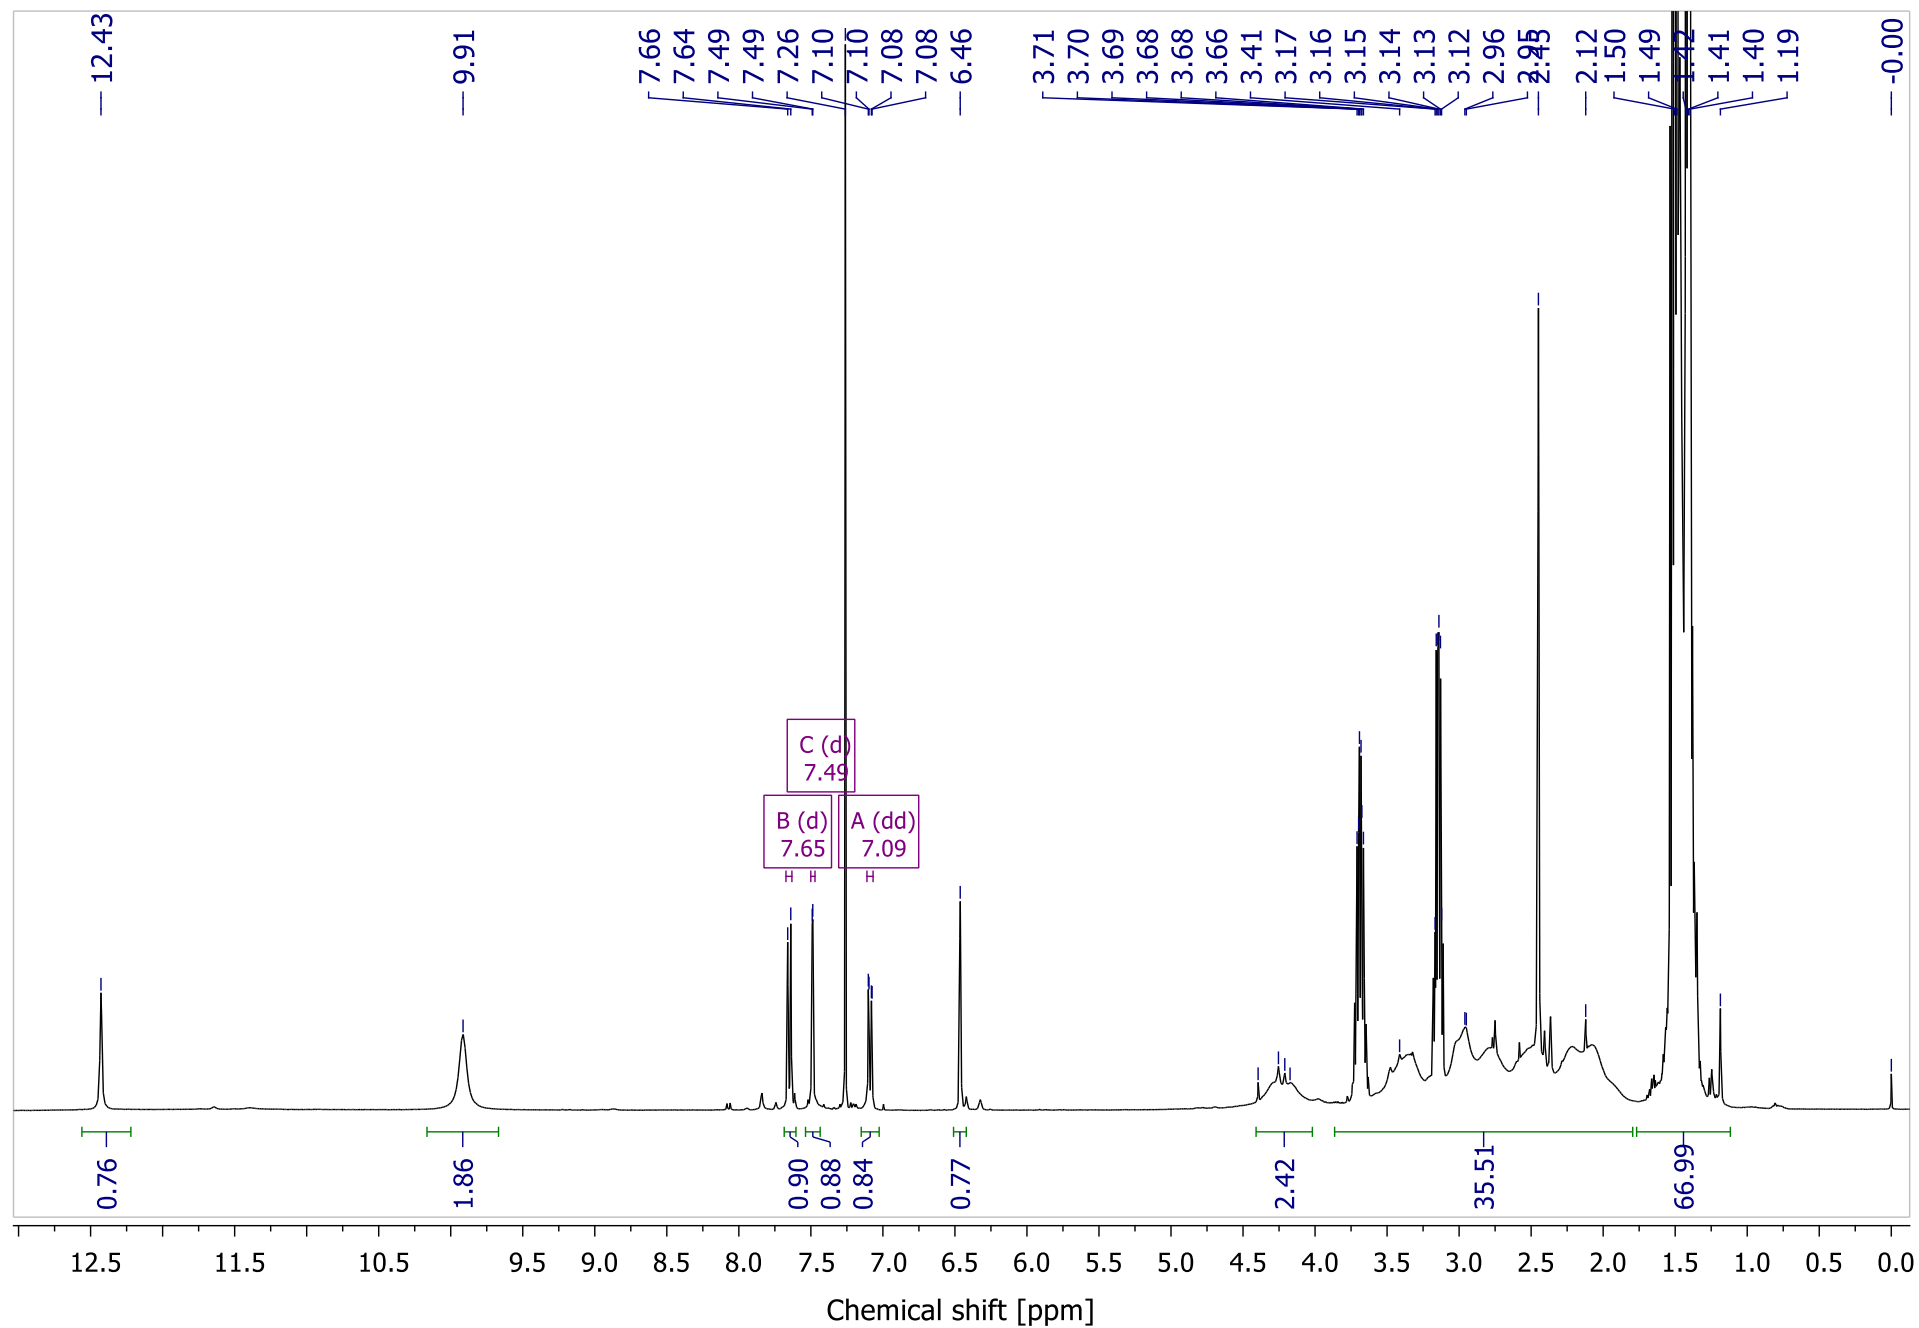

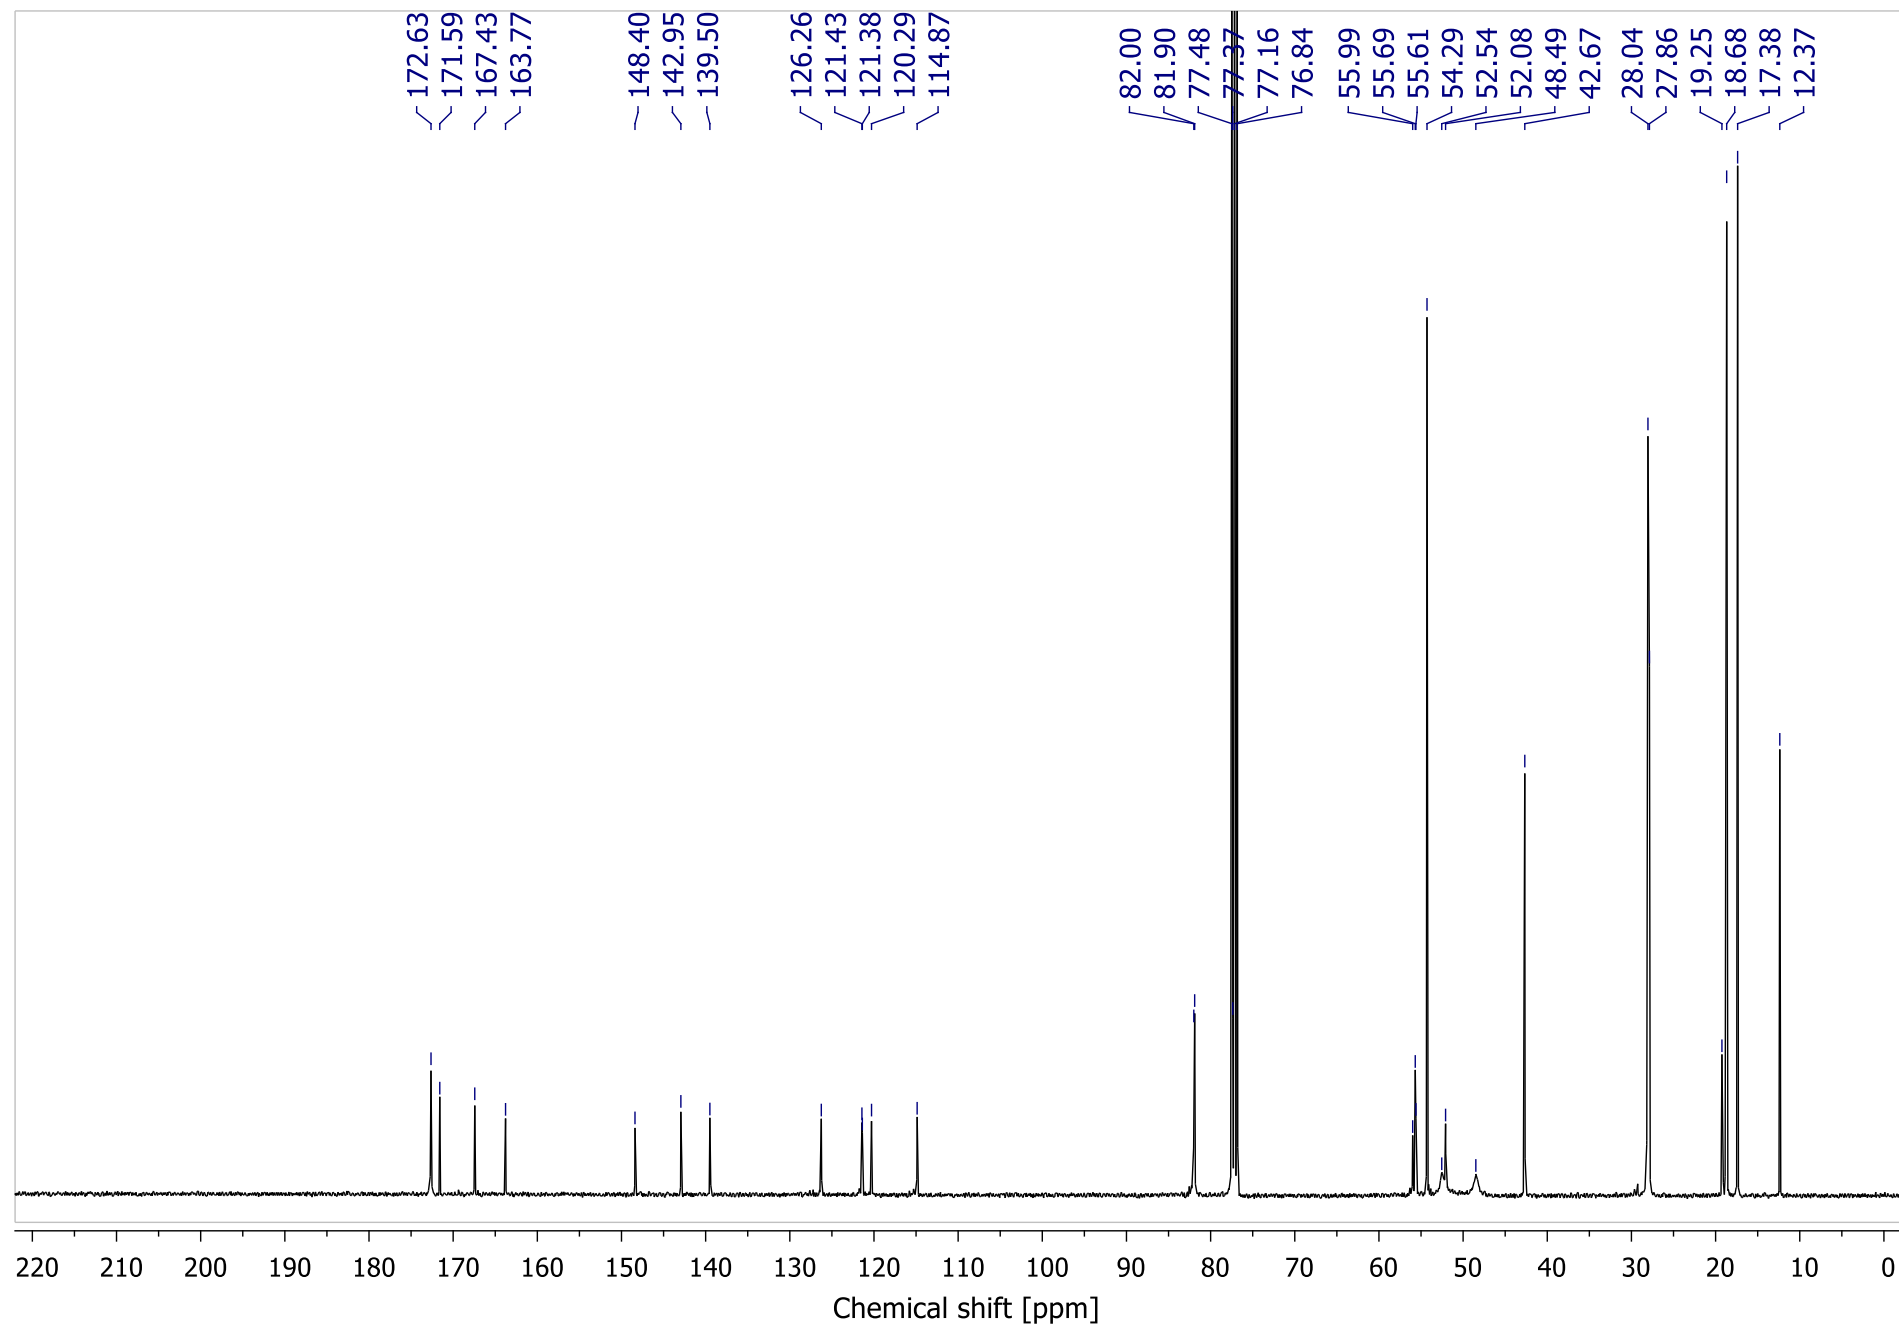

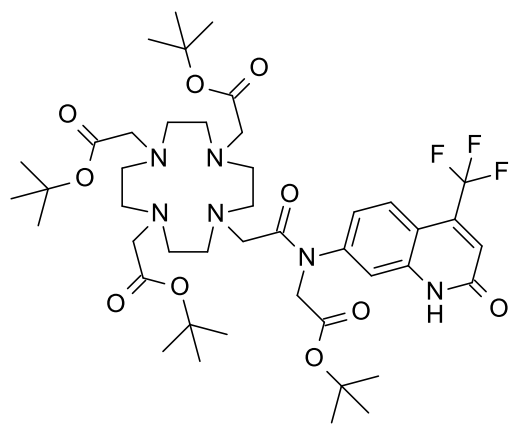

Formula Weight : 897.03(4)

Exact Mass : 896.48708

Formula :  $C_{44}H_{67}F_3N_6O_{10}$ 

Composition : C 58.91% H 7.53% N 9.37%

O 17.84% F 6.35%

DKS57\_072A\_1090\_5um\_180309145528

3/9/2018 2:55:28 PM

RT: 0.00 - 10.67

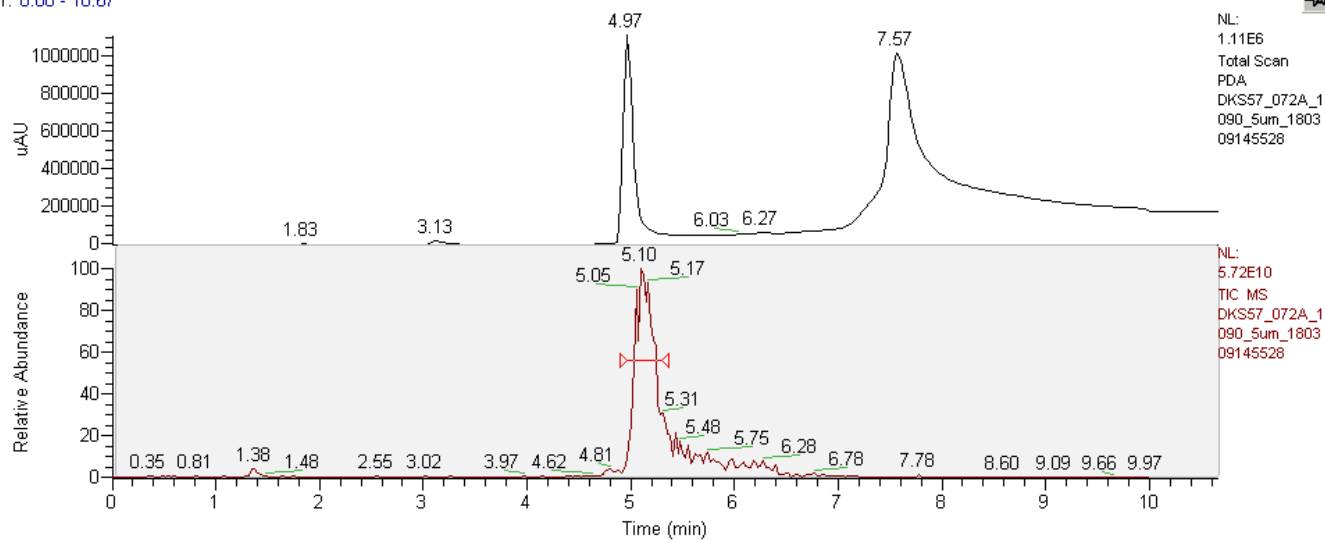

NL:  
1.11E6  
Total Scan  
PDA  
DKS57\_072A\_1  
090\_5um\_1803  
09145528

NL:  
5.72E10  
TIC MS  
DKS57\_072A\_1  
090\_5um\_1803  
09145528

DKS57\_072A\_1090\_5um\_180309145528 #149 RT: 4.97 AV: 1 NL: 2.60E6 microAU

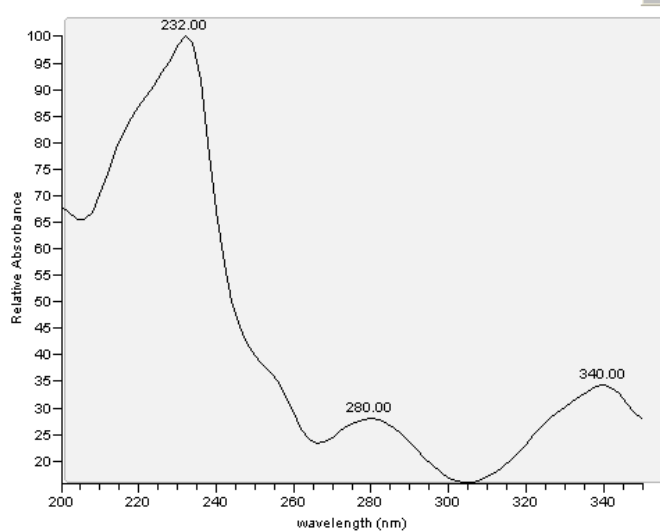DKS57\_072A\_1090\_5um\_180309145528 #186-200 RT: 4.96-5.29 AV: 15 NL: 1.67E10  
T: + e ESI Full ms [80.00-2000.00]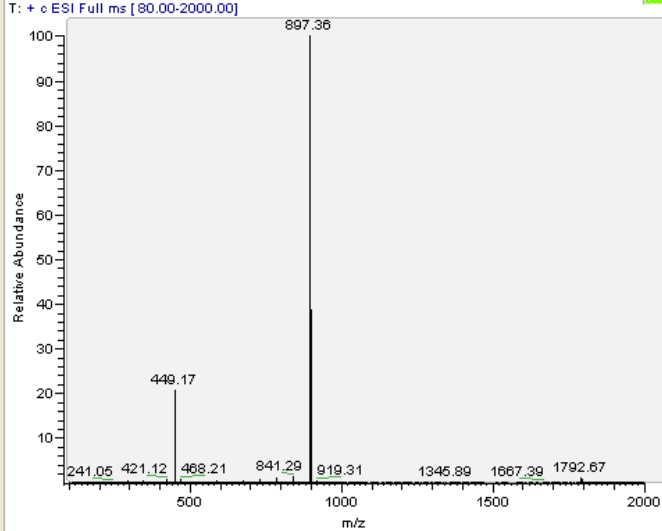

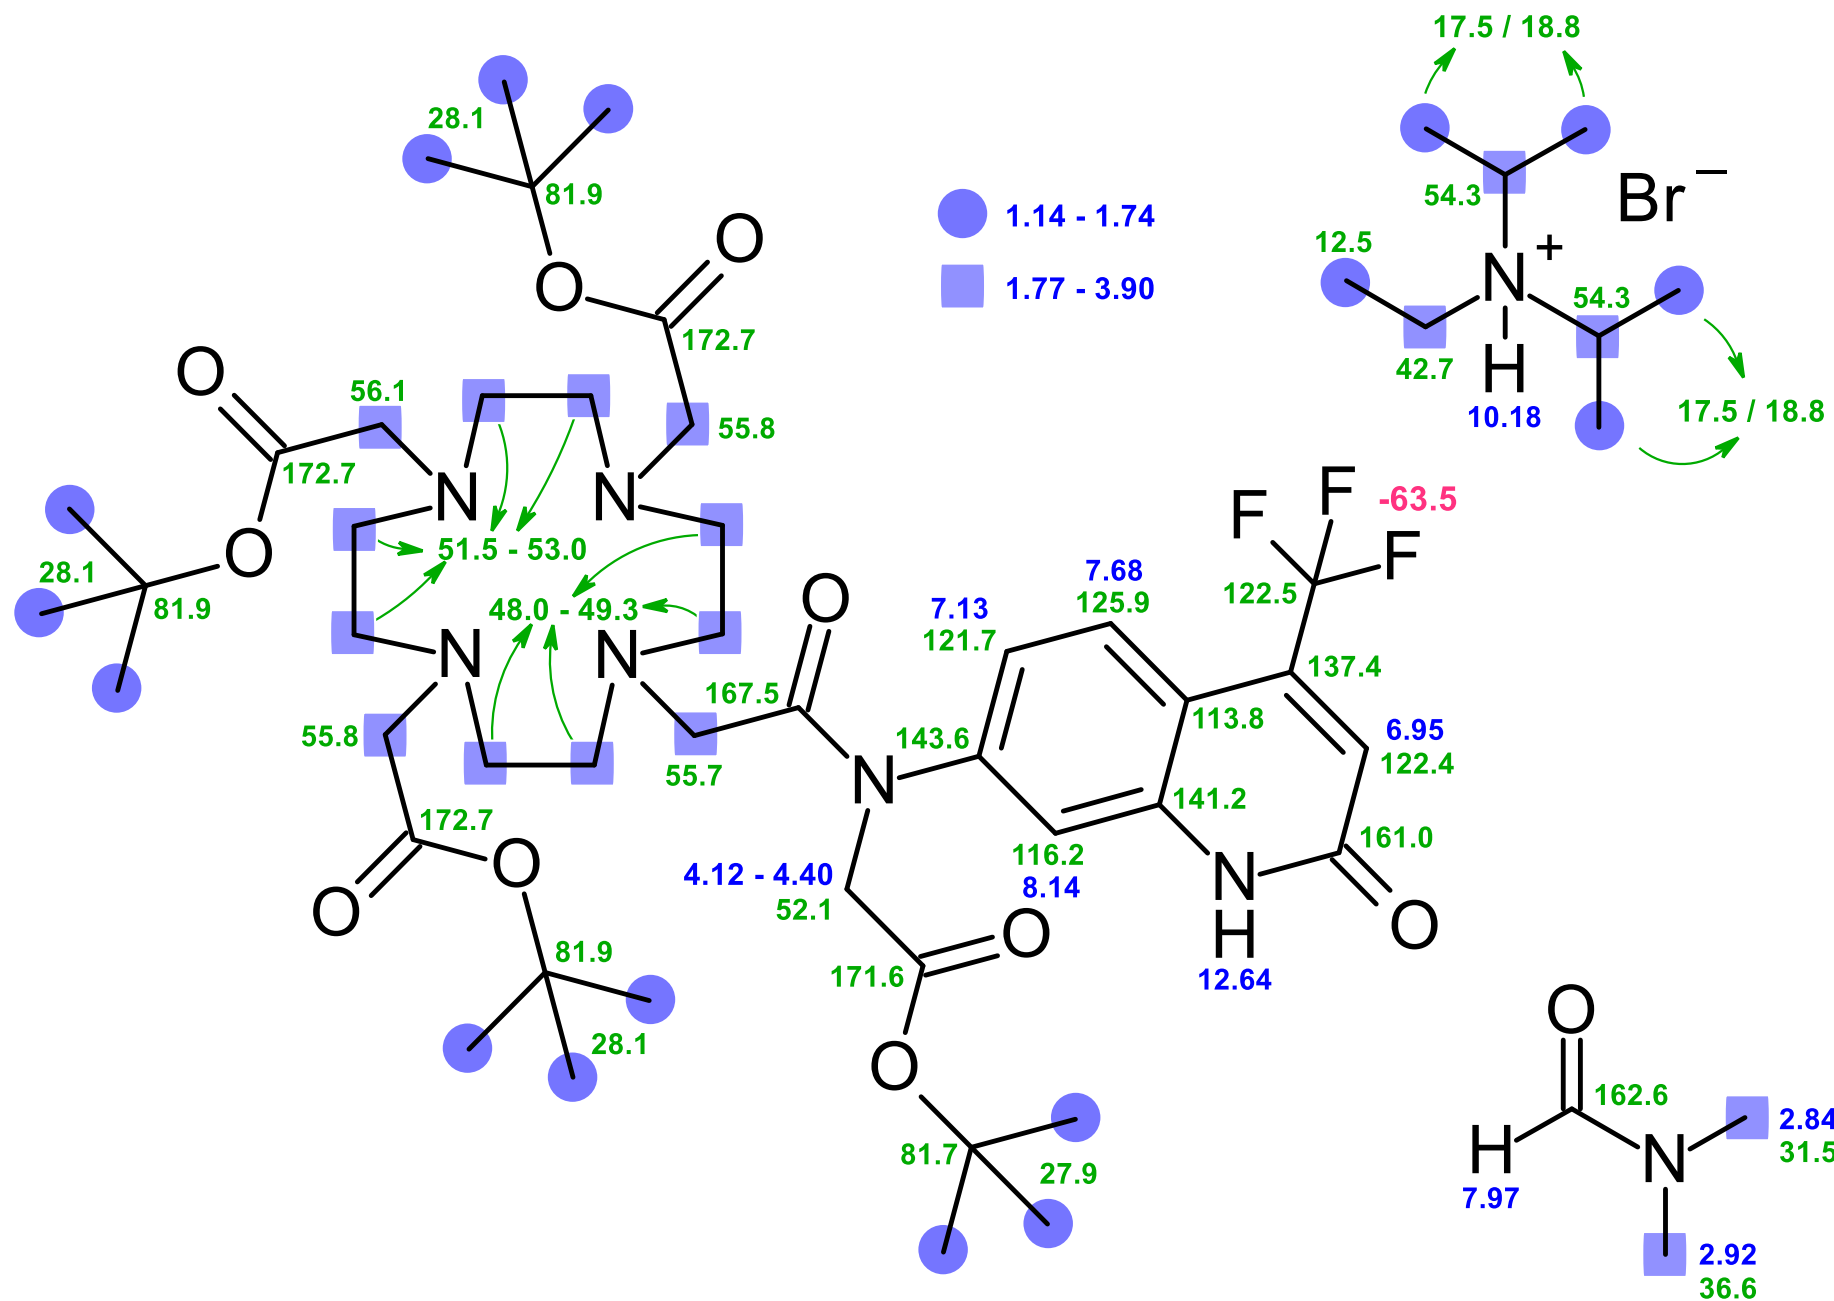

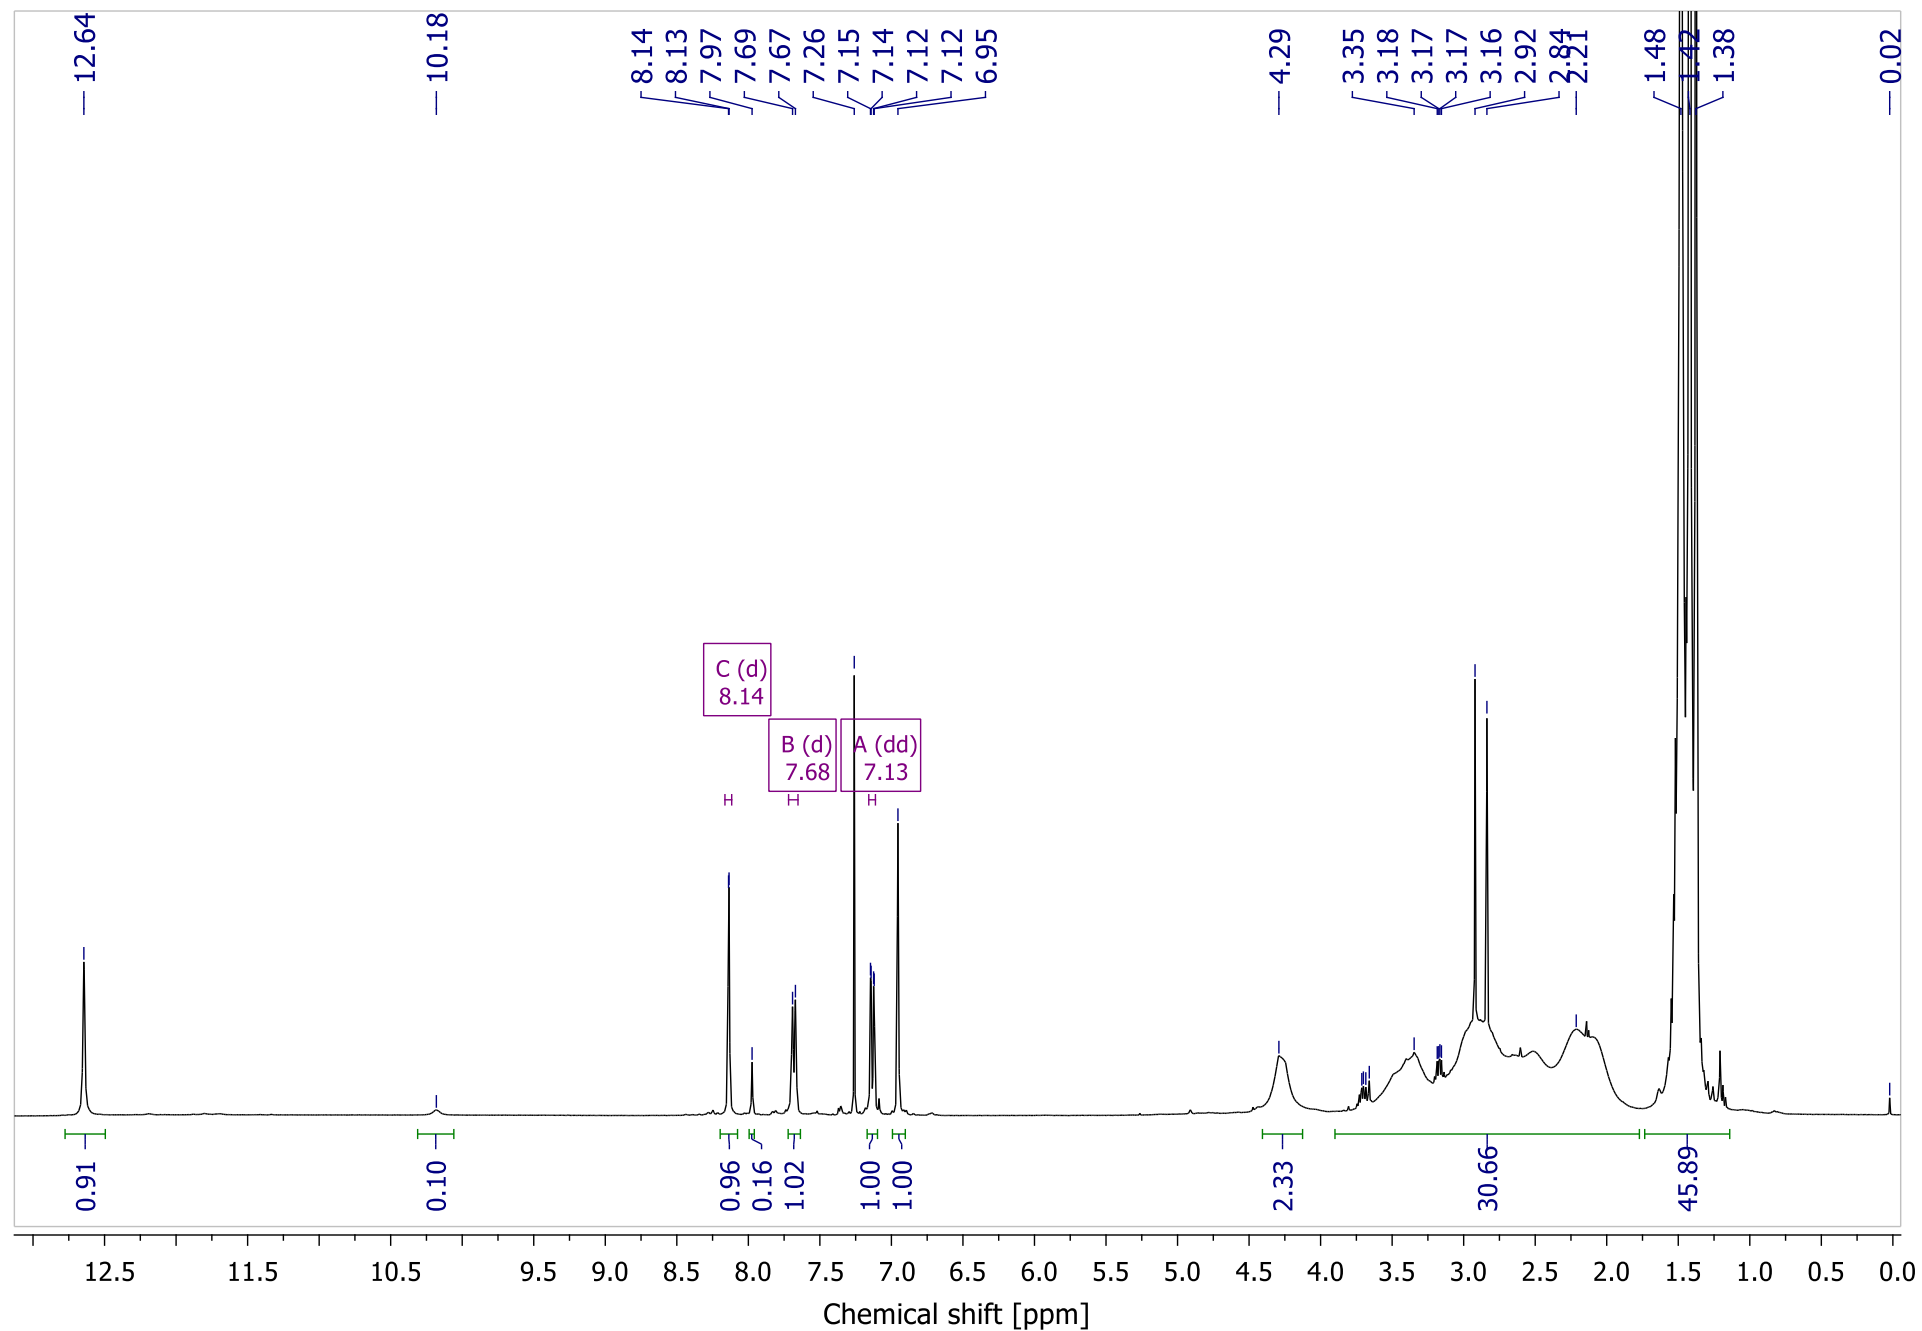

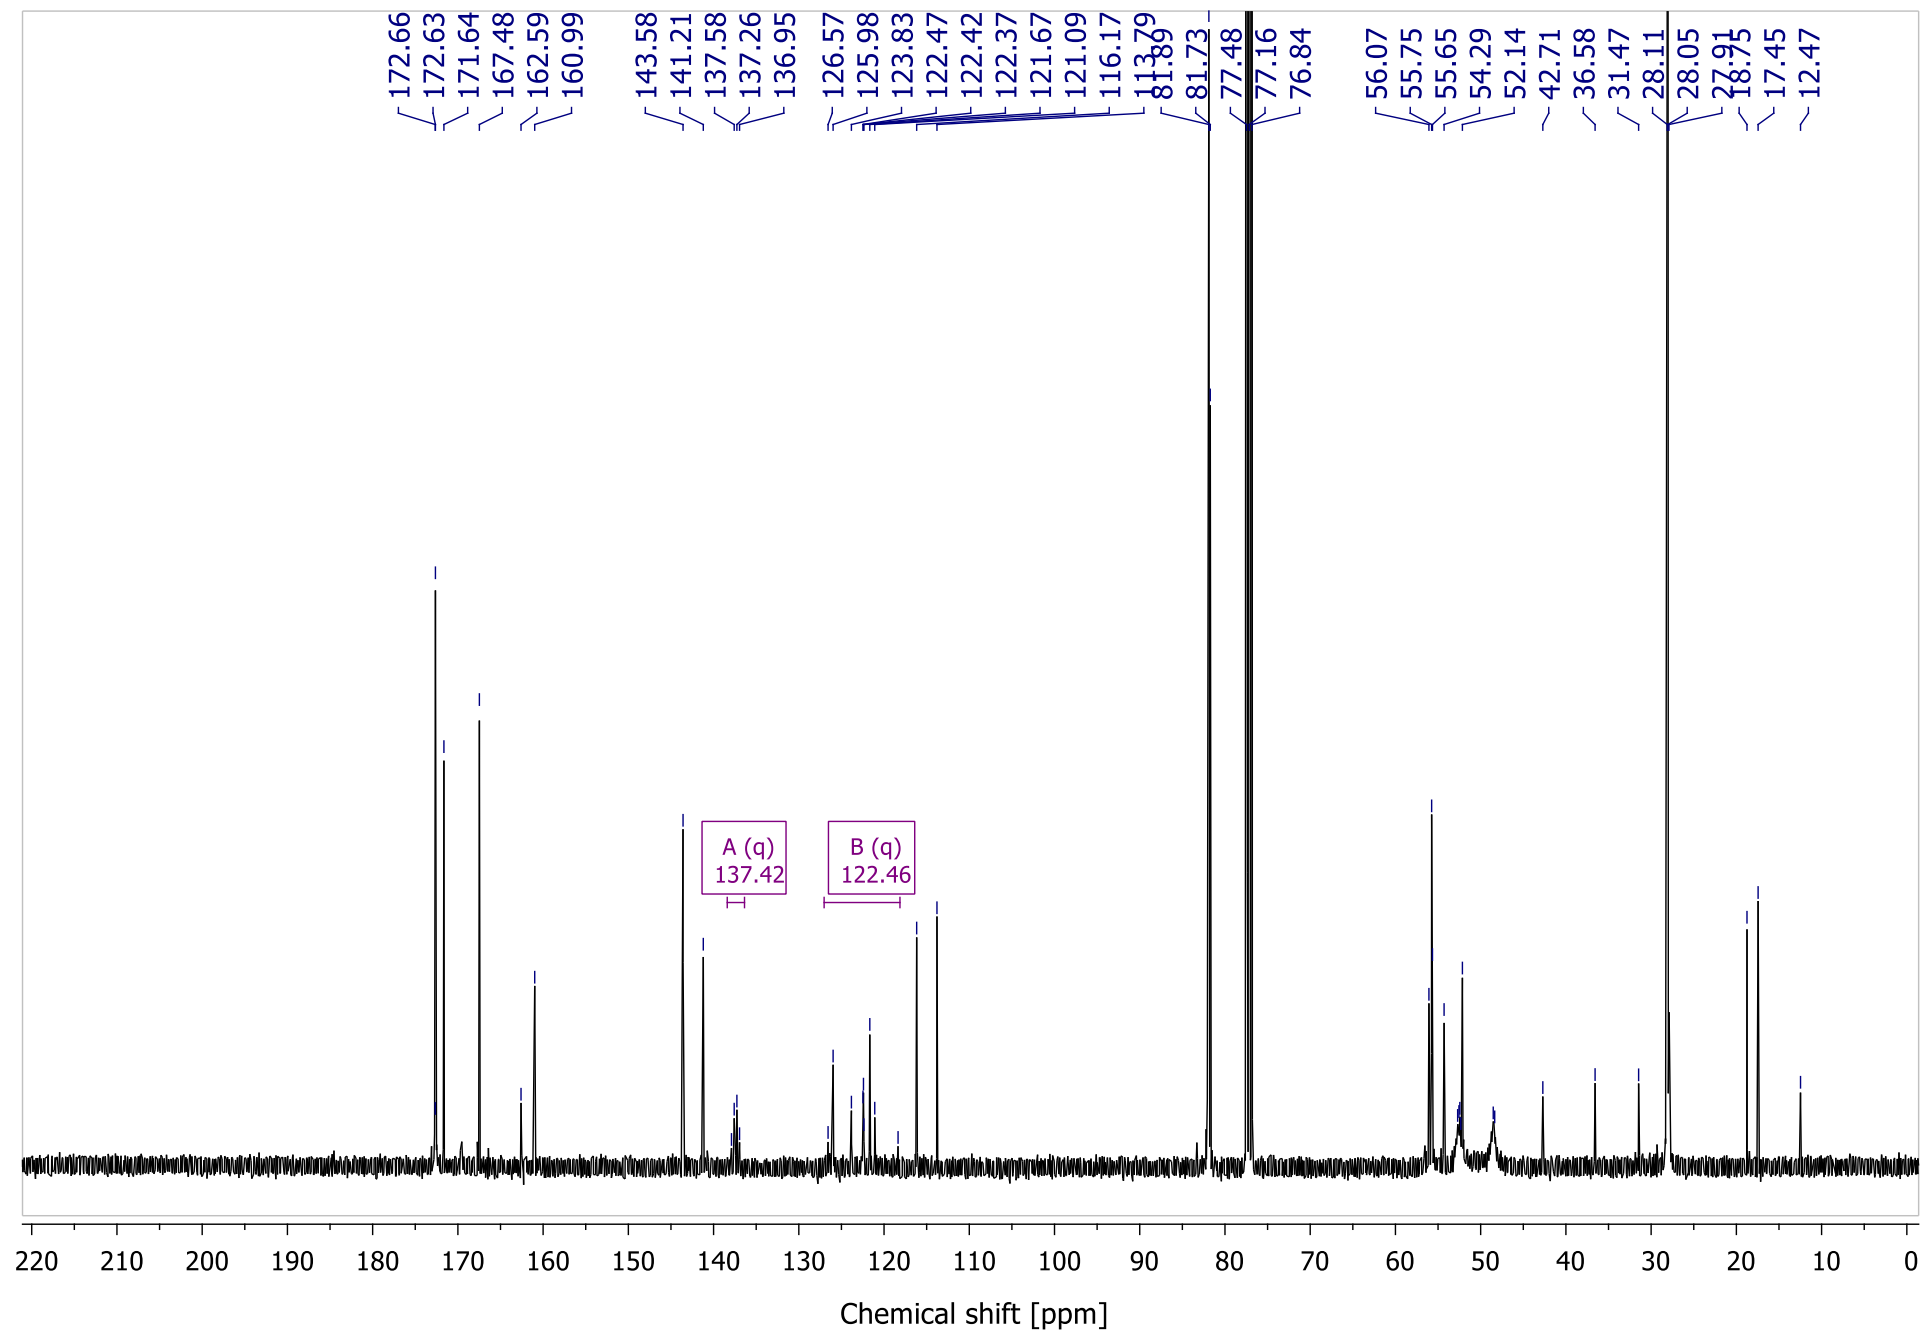

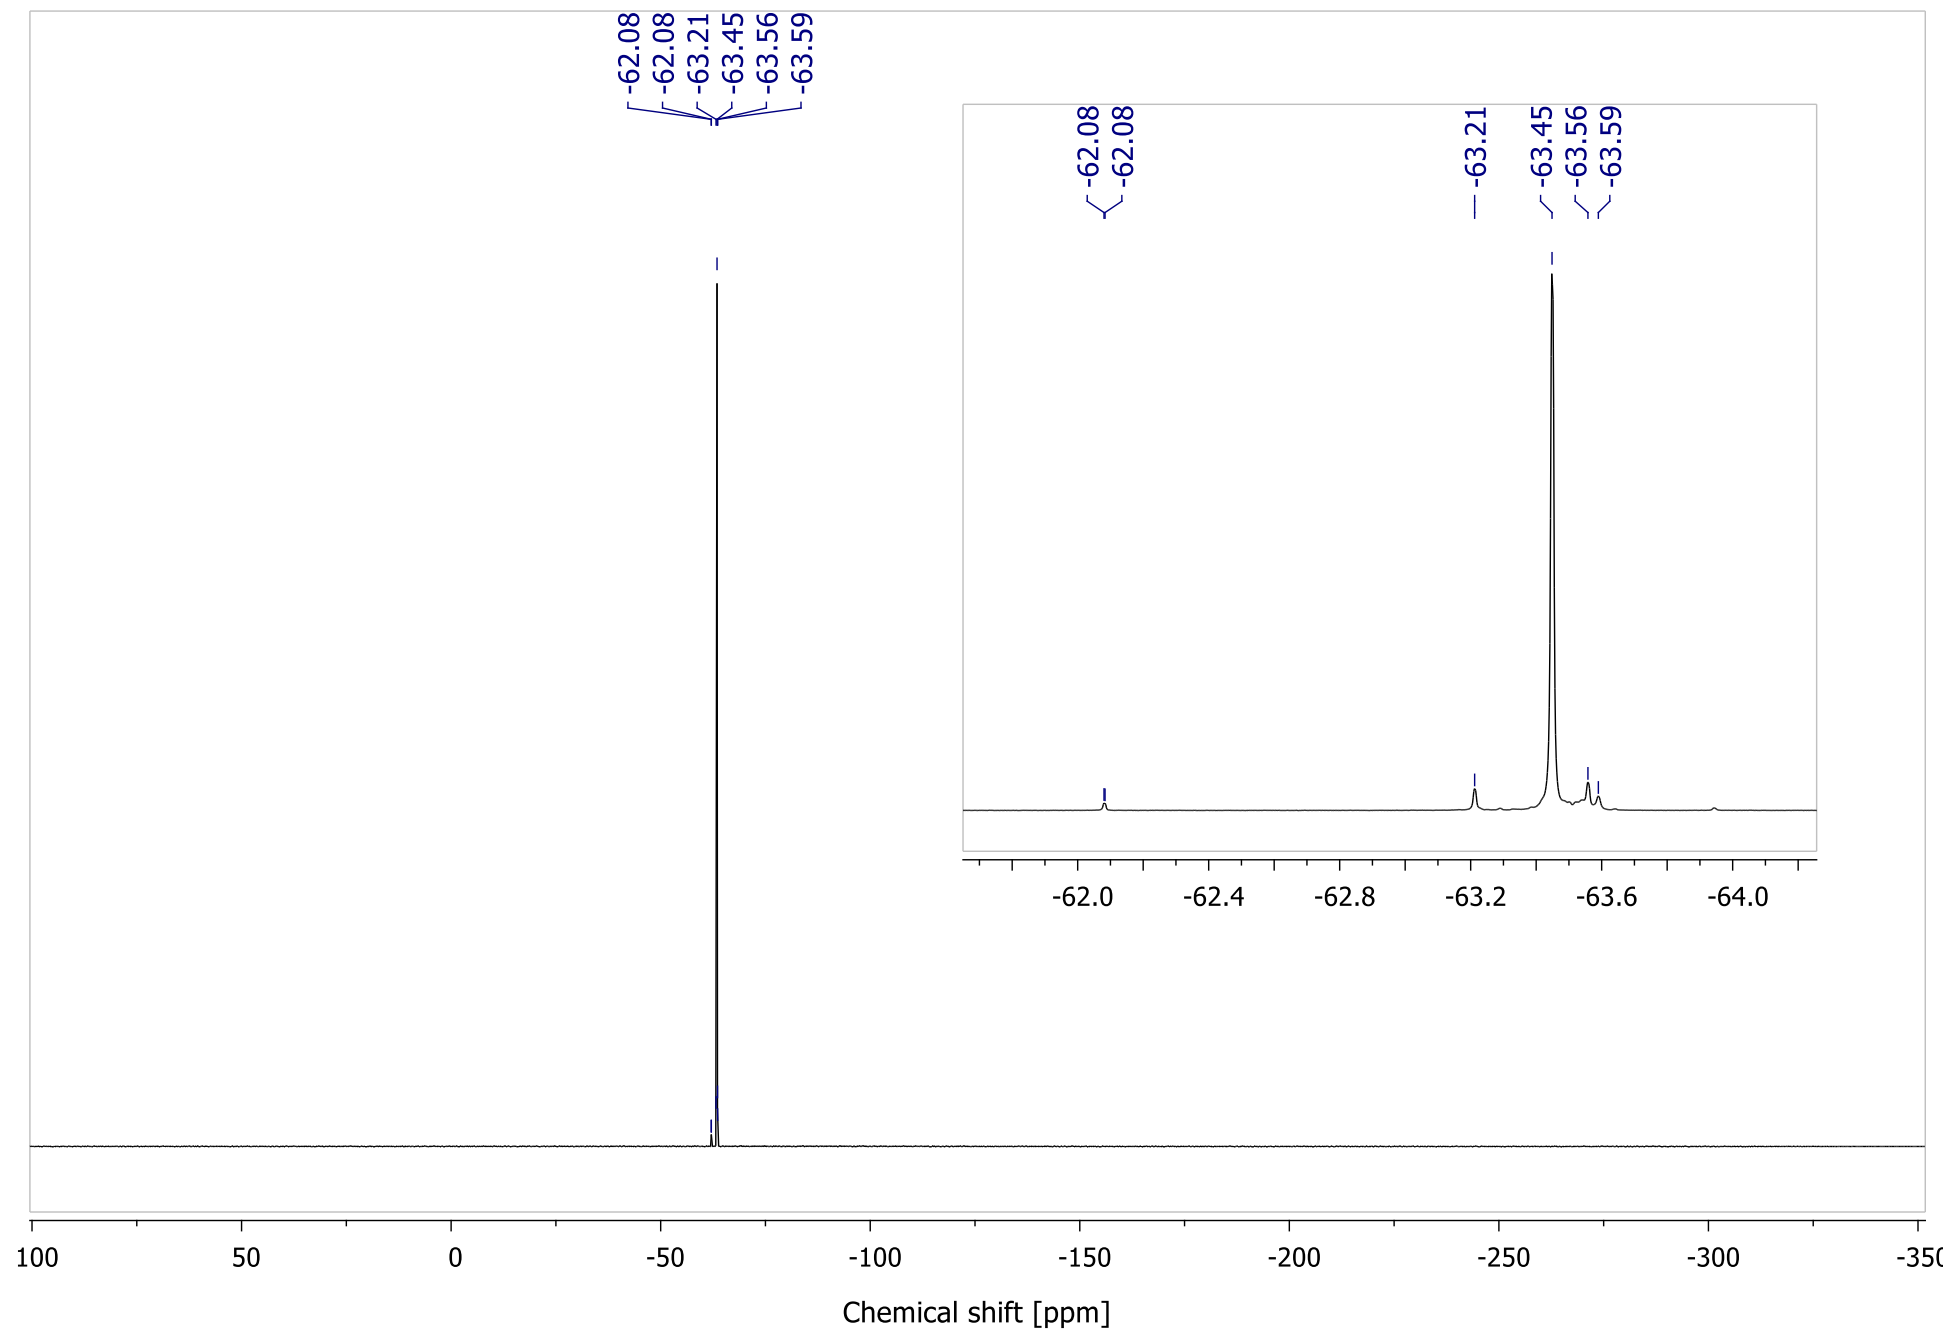



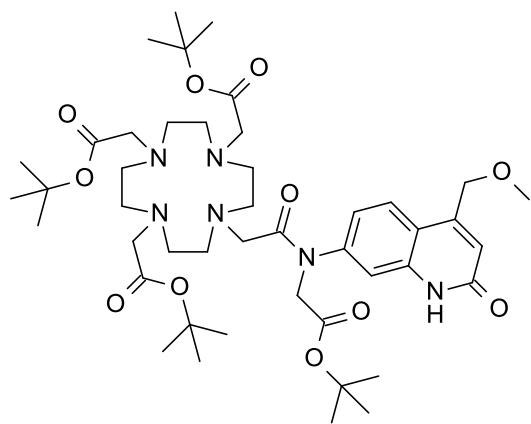

Formula Weight : 873.09(4)

Exact Mass : 872.52591

Formula : C<sub>45</sub>H<sub>72</sub>N<sub>6</sub>O<sub>11</sub>

Composition : C 61.90% H 8.31% N 9.63% O 20.16%

C:\Xcalibur\...DKS57\_070B\_wup\_1050\_5um

2/9/2018 12:17:42 PM

RT: 0.00 - 16.53

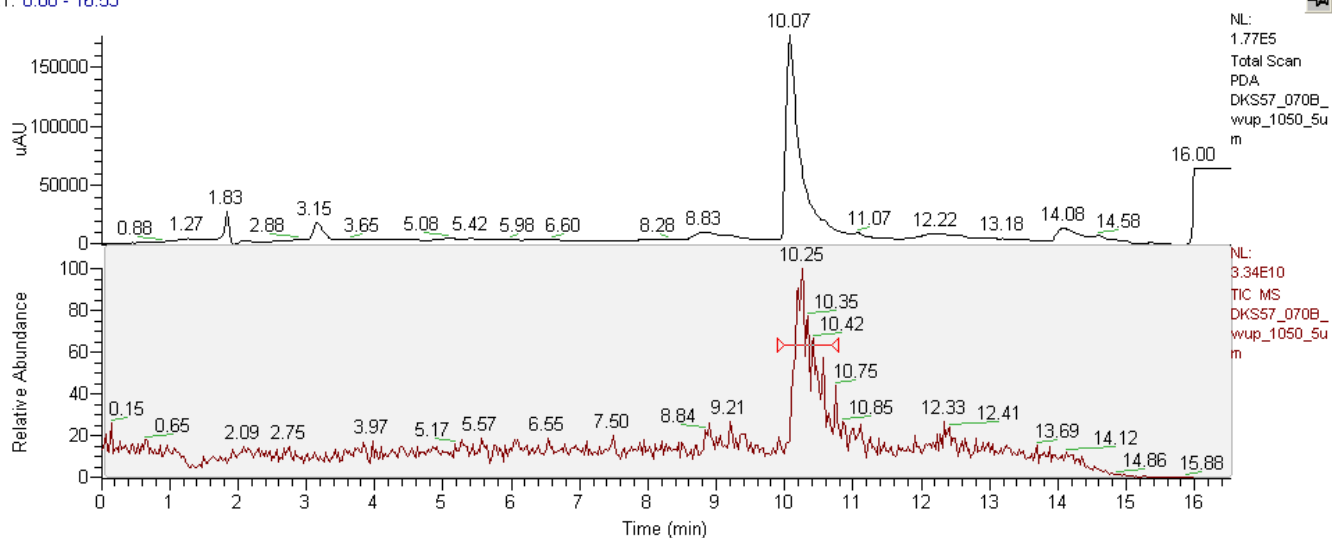

DKS57\_070B\_wup\_1050\_5um #593-619 RT: 9.88-10.32 AV: 27 NL: 3.96E5 microAU

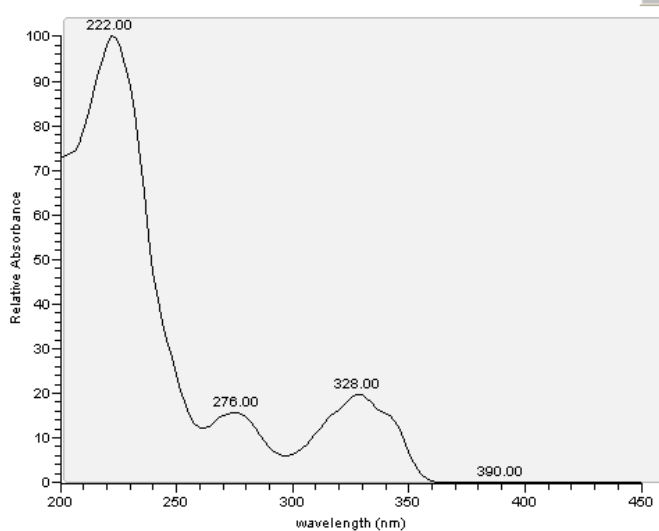DKS57\_070B\_wup\_1050\_5um #378-406 RT: 9.97-10.67 AV: 29 NL: 4.67E9  
T: + e ESI Full ms [80.00-2000.00]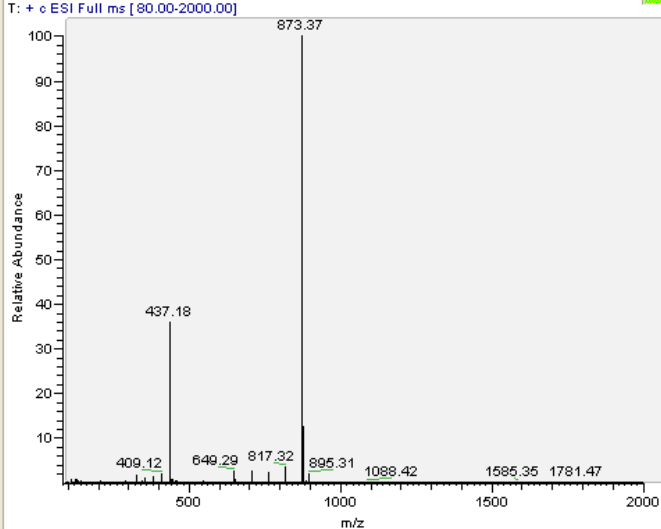

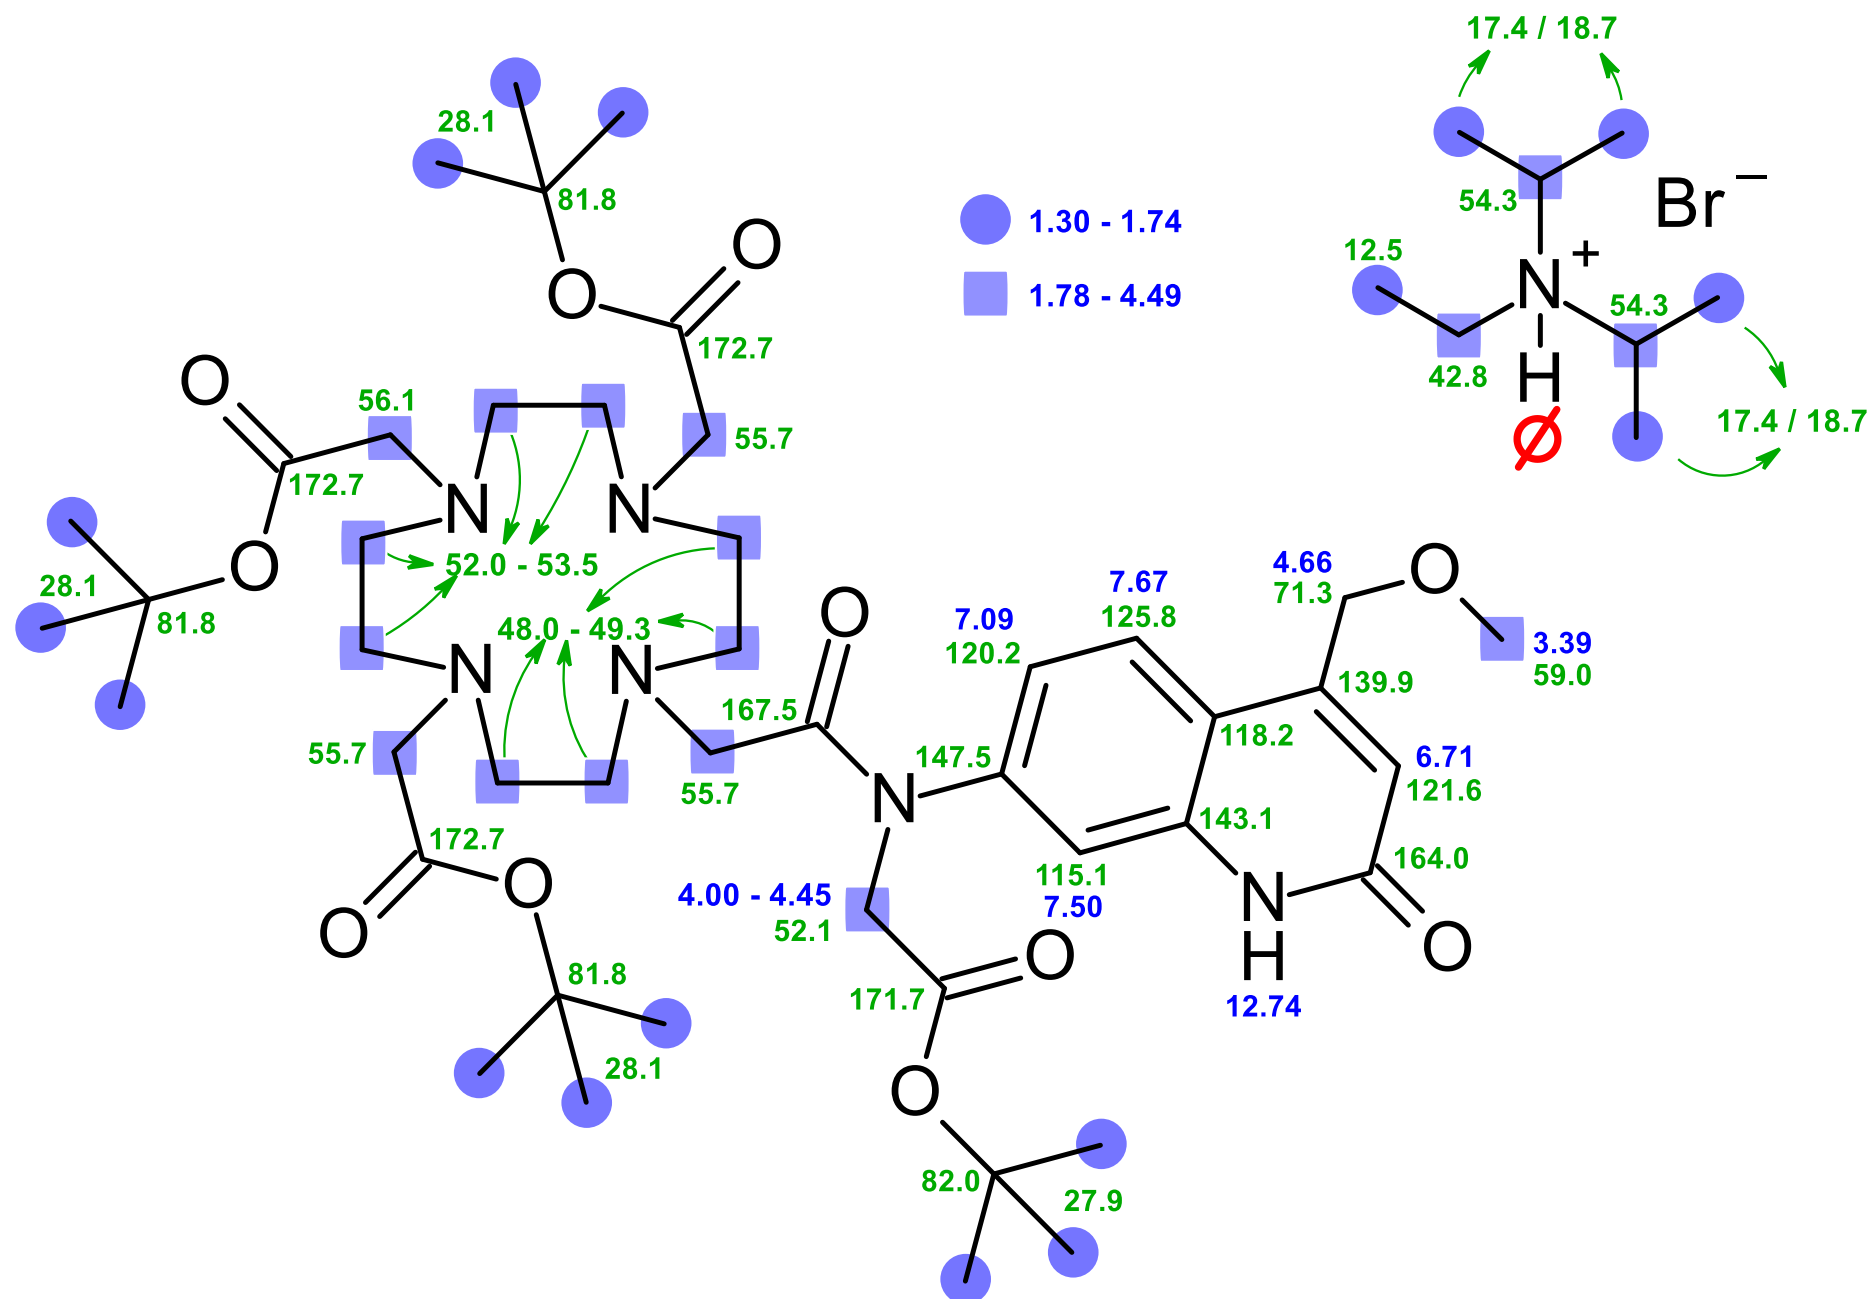

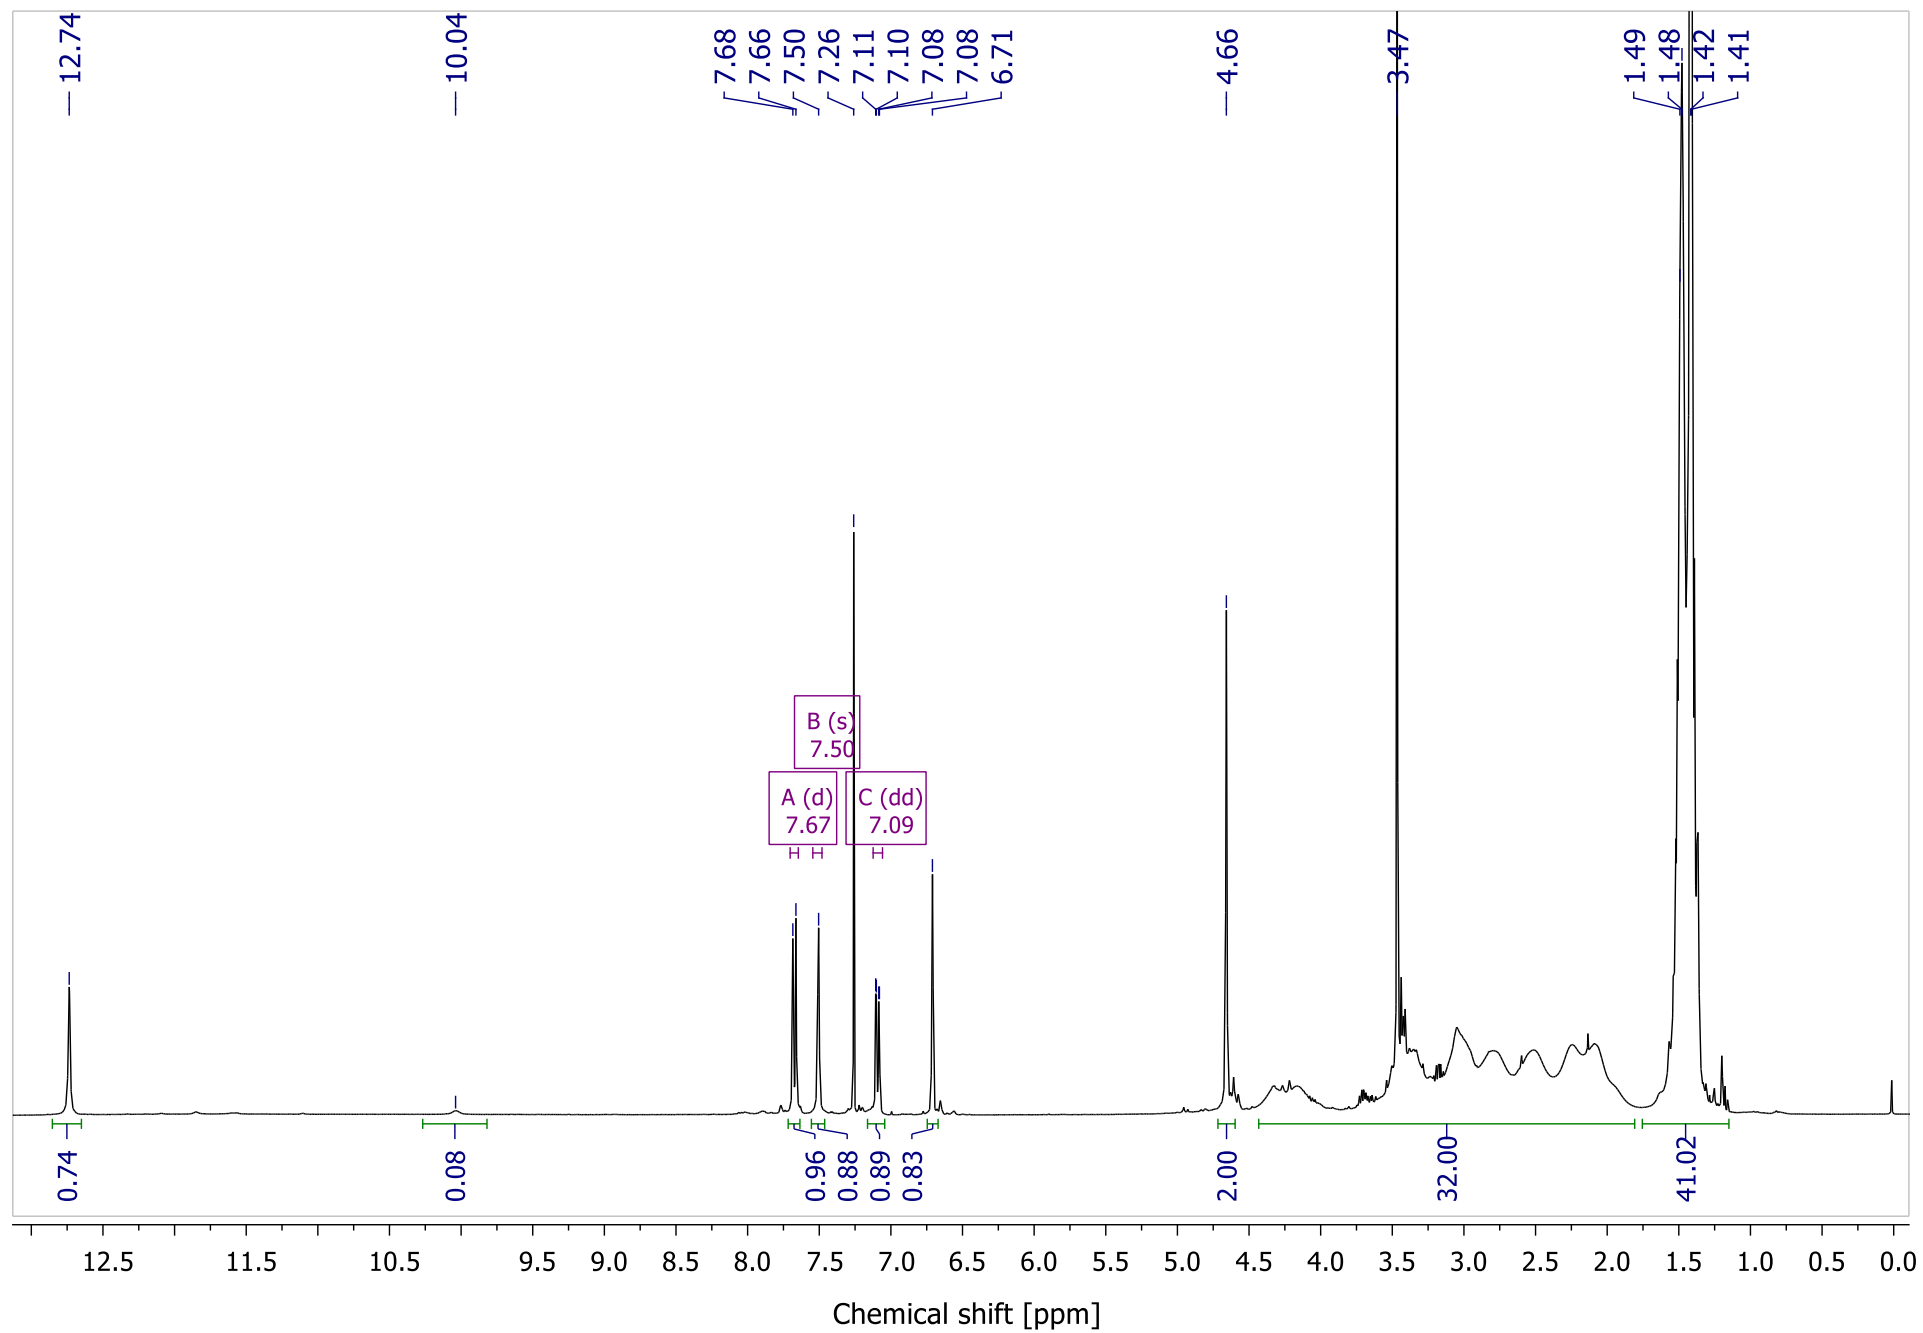

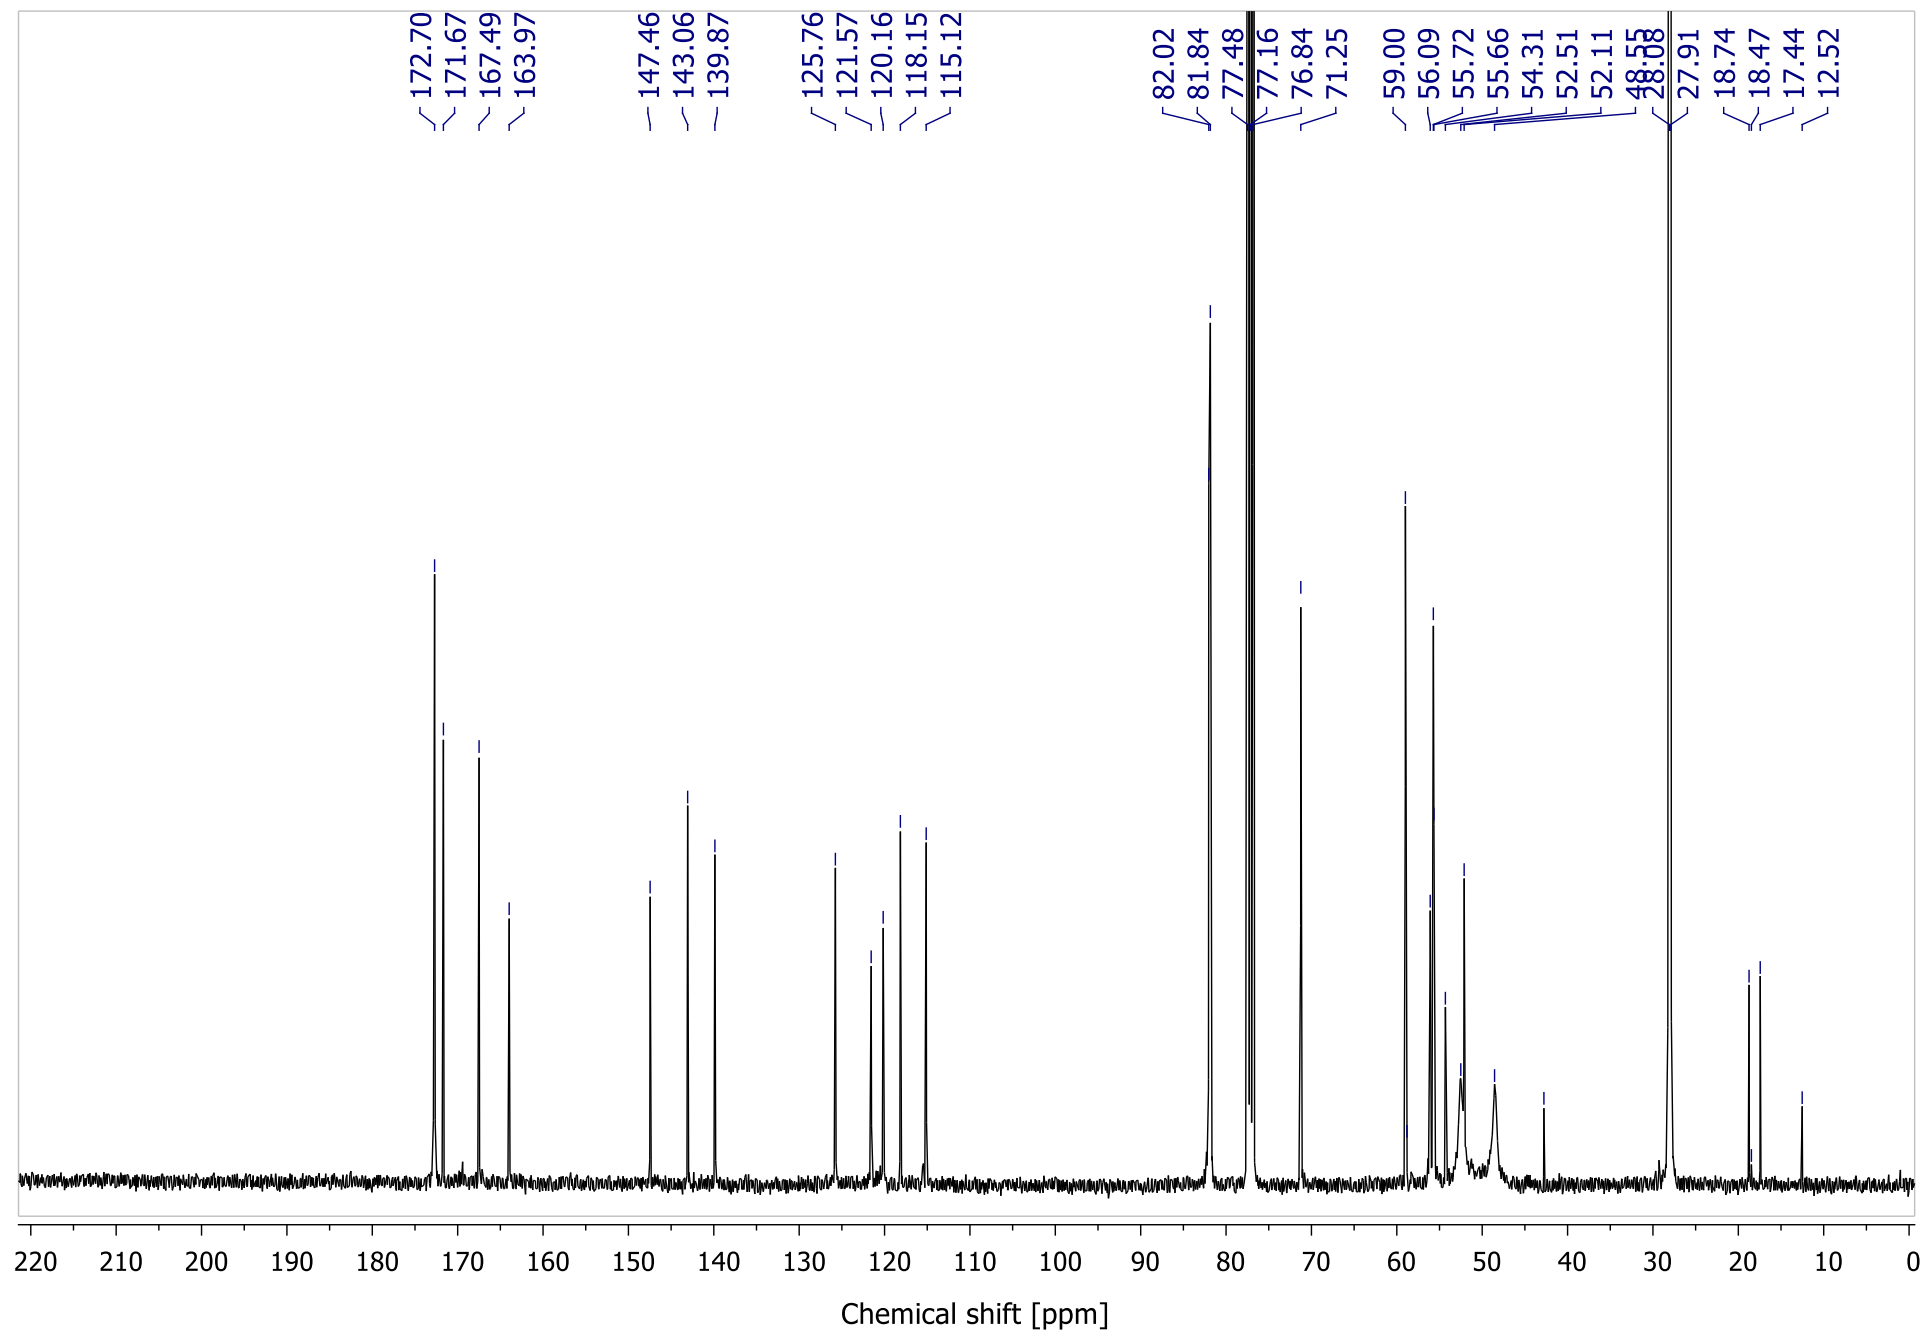

# DKS57\_074A

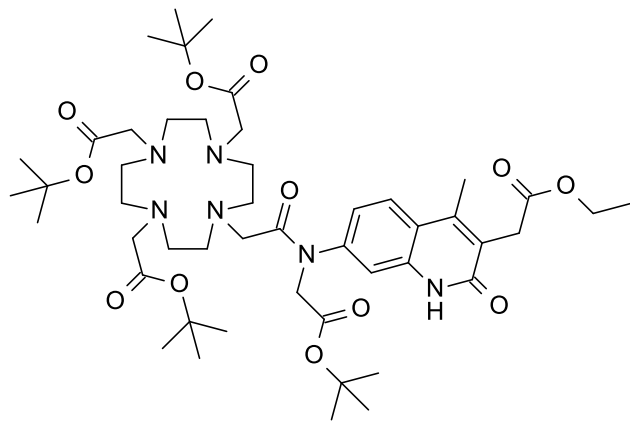

Formula Weight : 929.15(4)

Exact Mass : 928.55212

Formula :  $C_{48}H_{76}N_6O_{12}$

Composition : C 62.05% H 8.24%

N 9.04% O 20.66%

DKS57\_074A\_1090\_5um\_180309150612

3/9/2018 3:06:12 PM

RT: 0.00 - 10.00

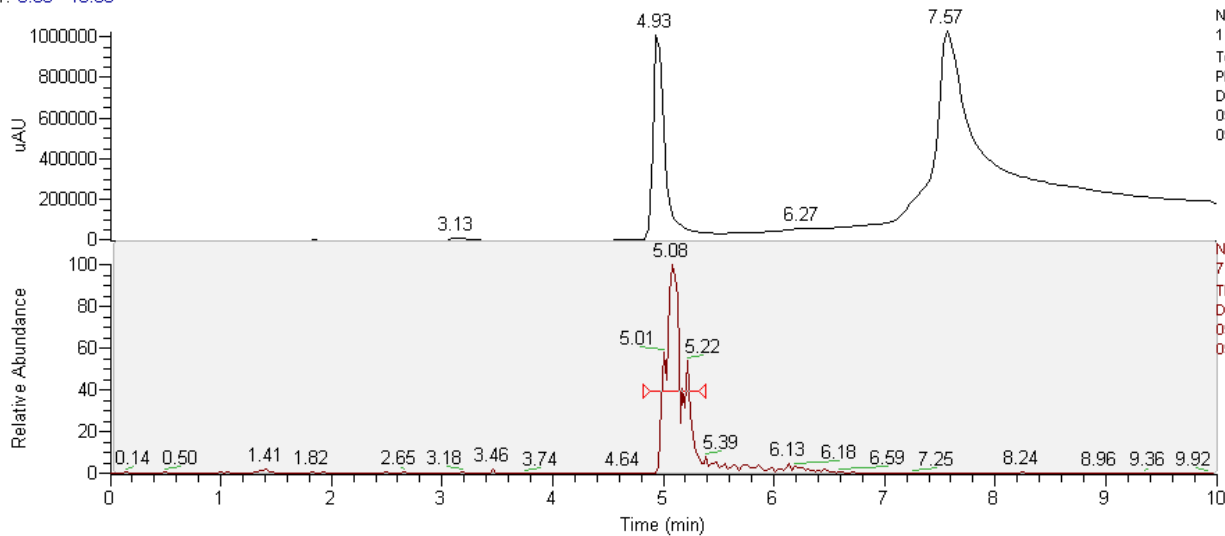

NL:  
1.03E6  
Total Scan  
PDA  
DKS57\_074A\_1  
090\_5um\_1803  
09150612

NL:  
7.31E10  
TIC MS  
DKS57\_074A\_1  
090\_5um\_1803  
09150612

DKS57\_074A\_1090\_5um\_180309150612 #144-155 RT: 4.80-5.17 AV: 12 NL: 8.50E5 micro

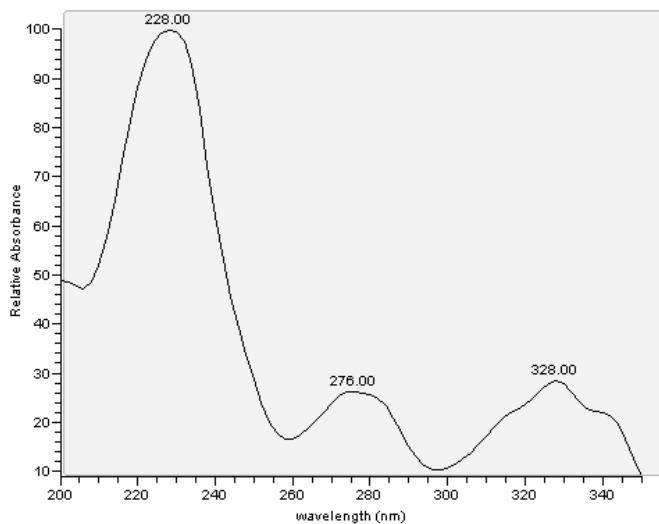

DKS57\_074A\_1090\_5um\_180309150612 #179-197 RT: 4.88-5.32 AV: 19 NL: 1.30E10  
T: + c ESI Full ms [80.00-2000.00]

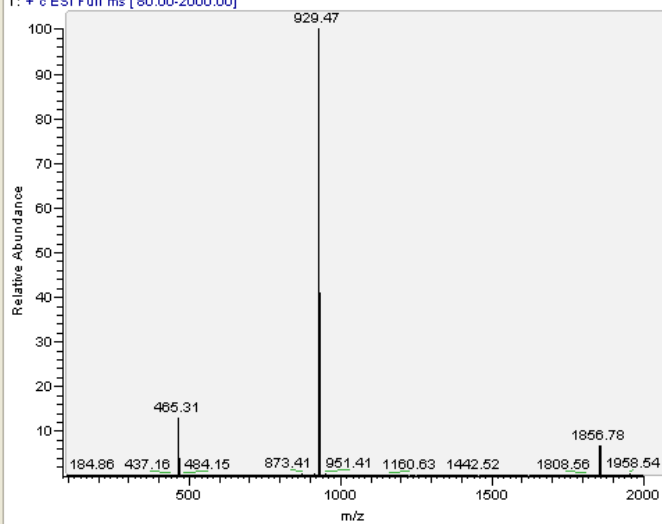

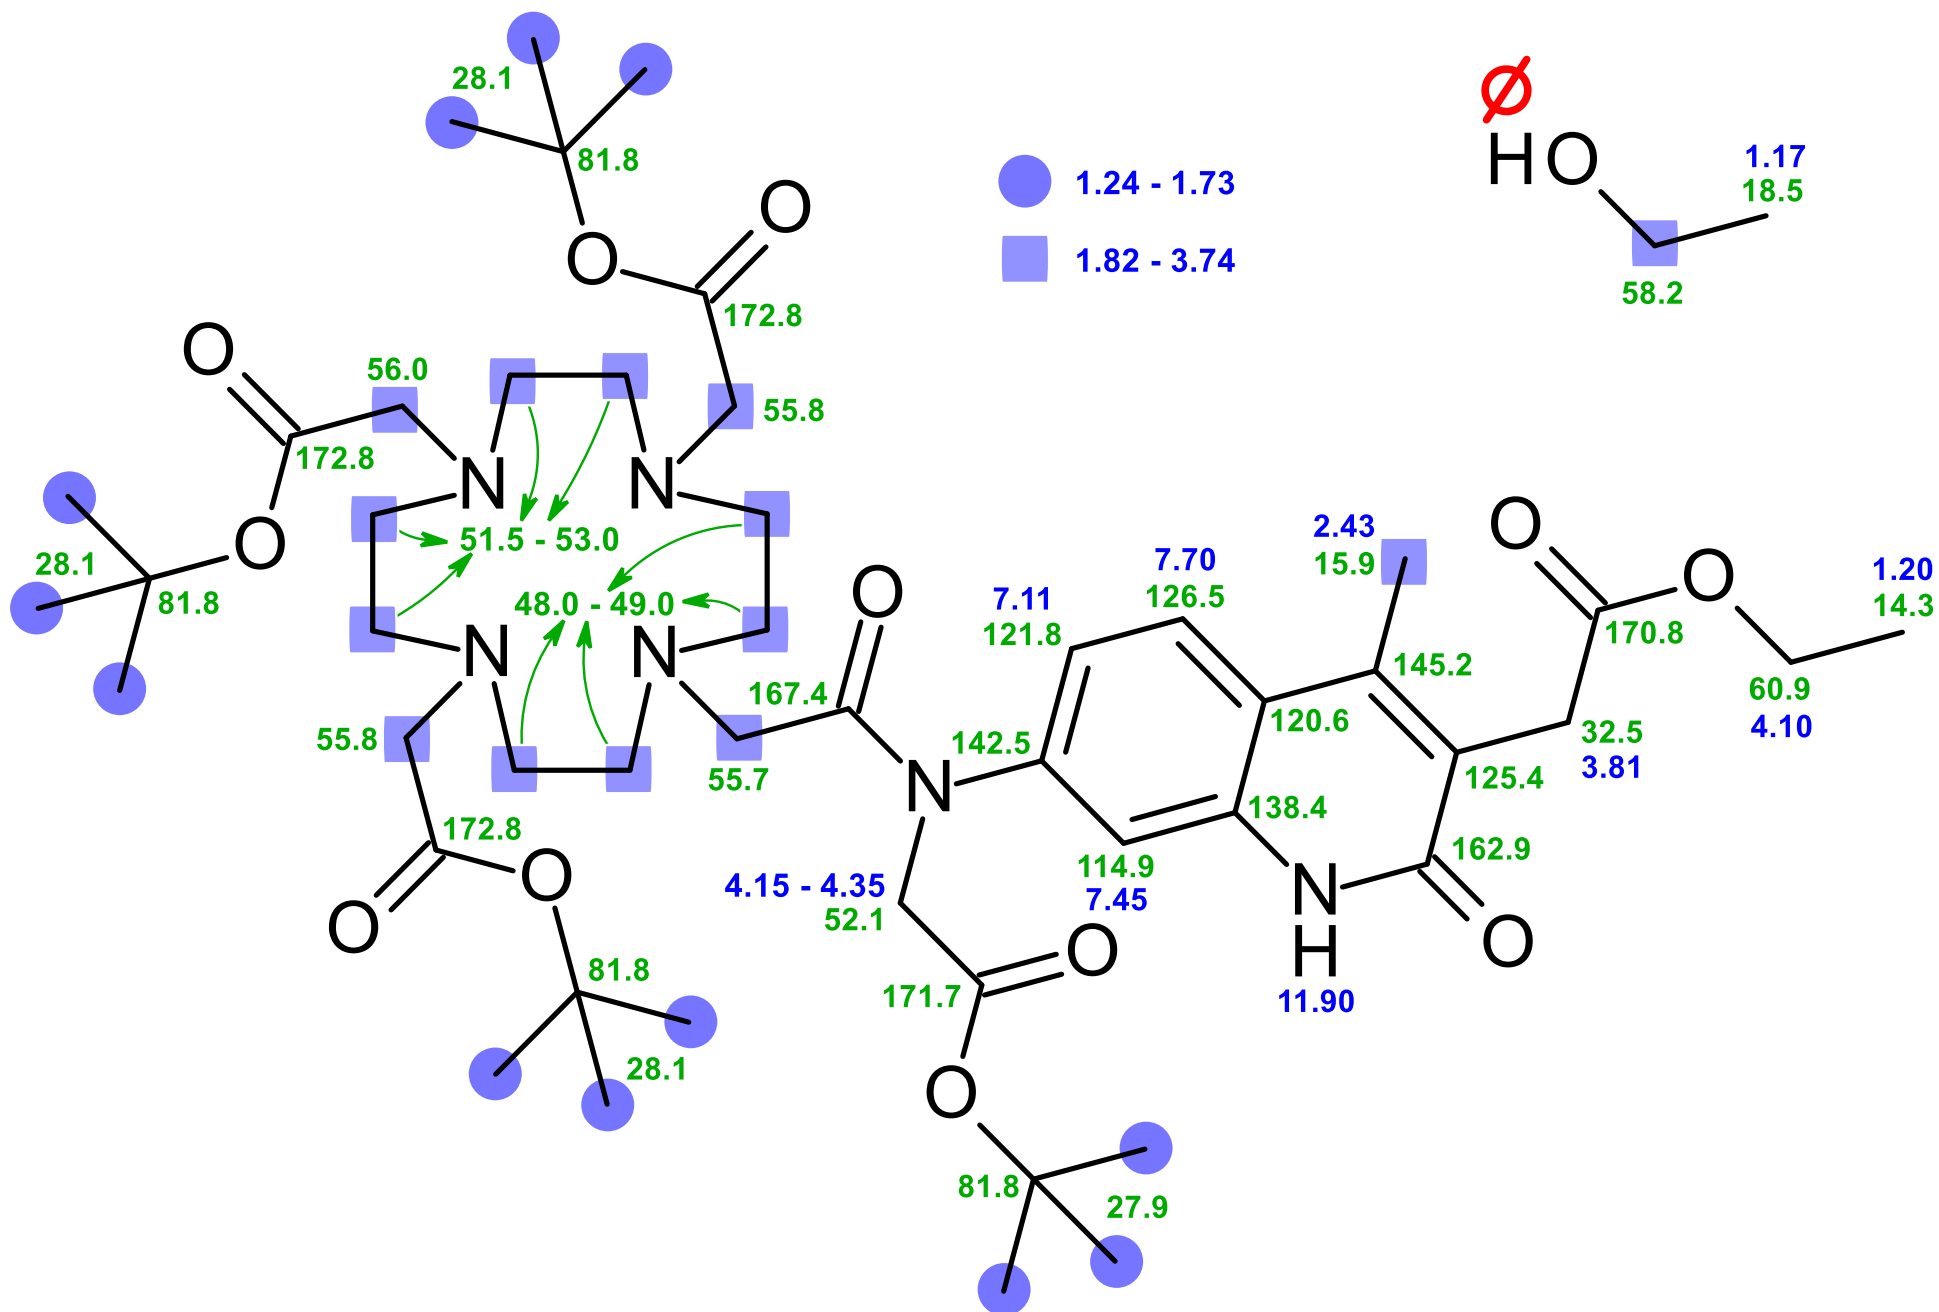

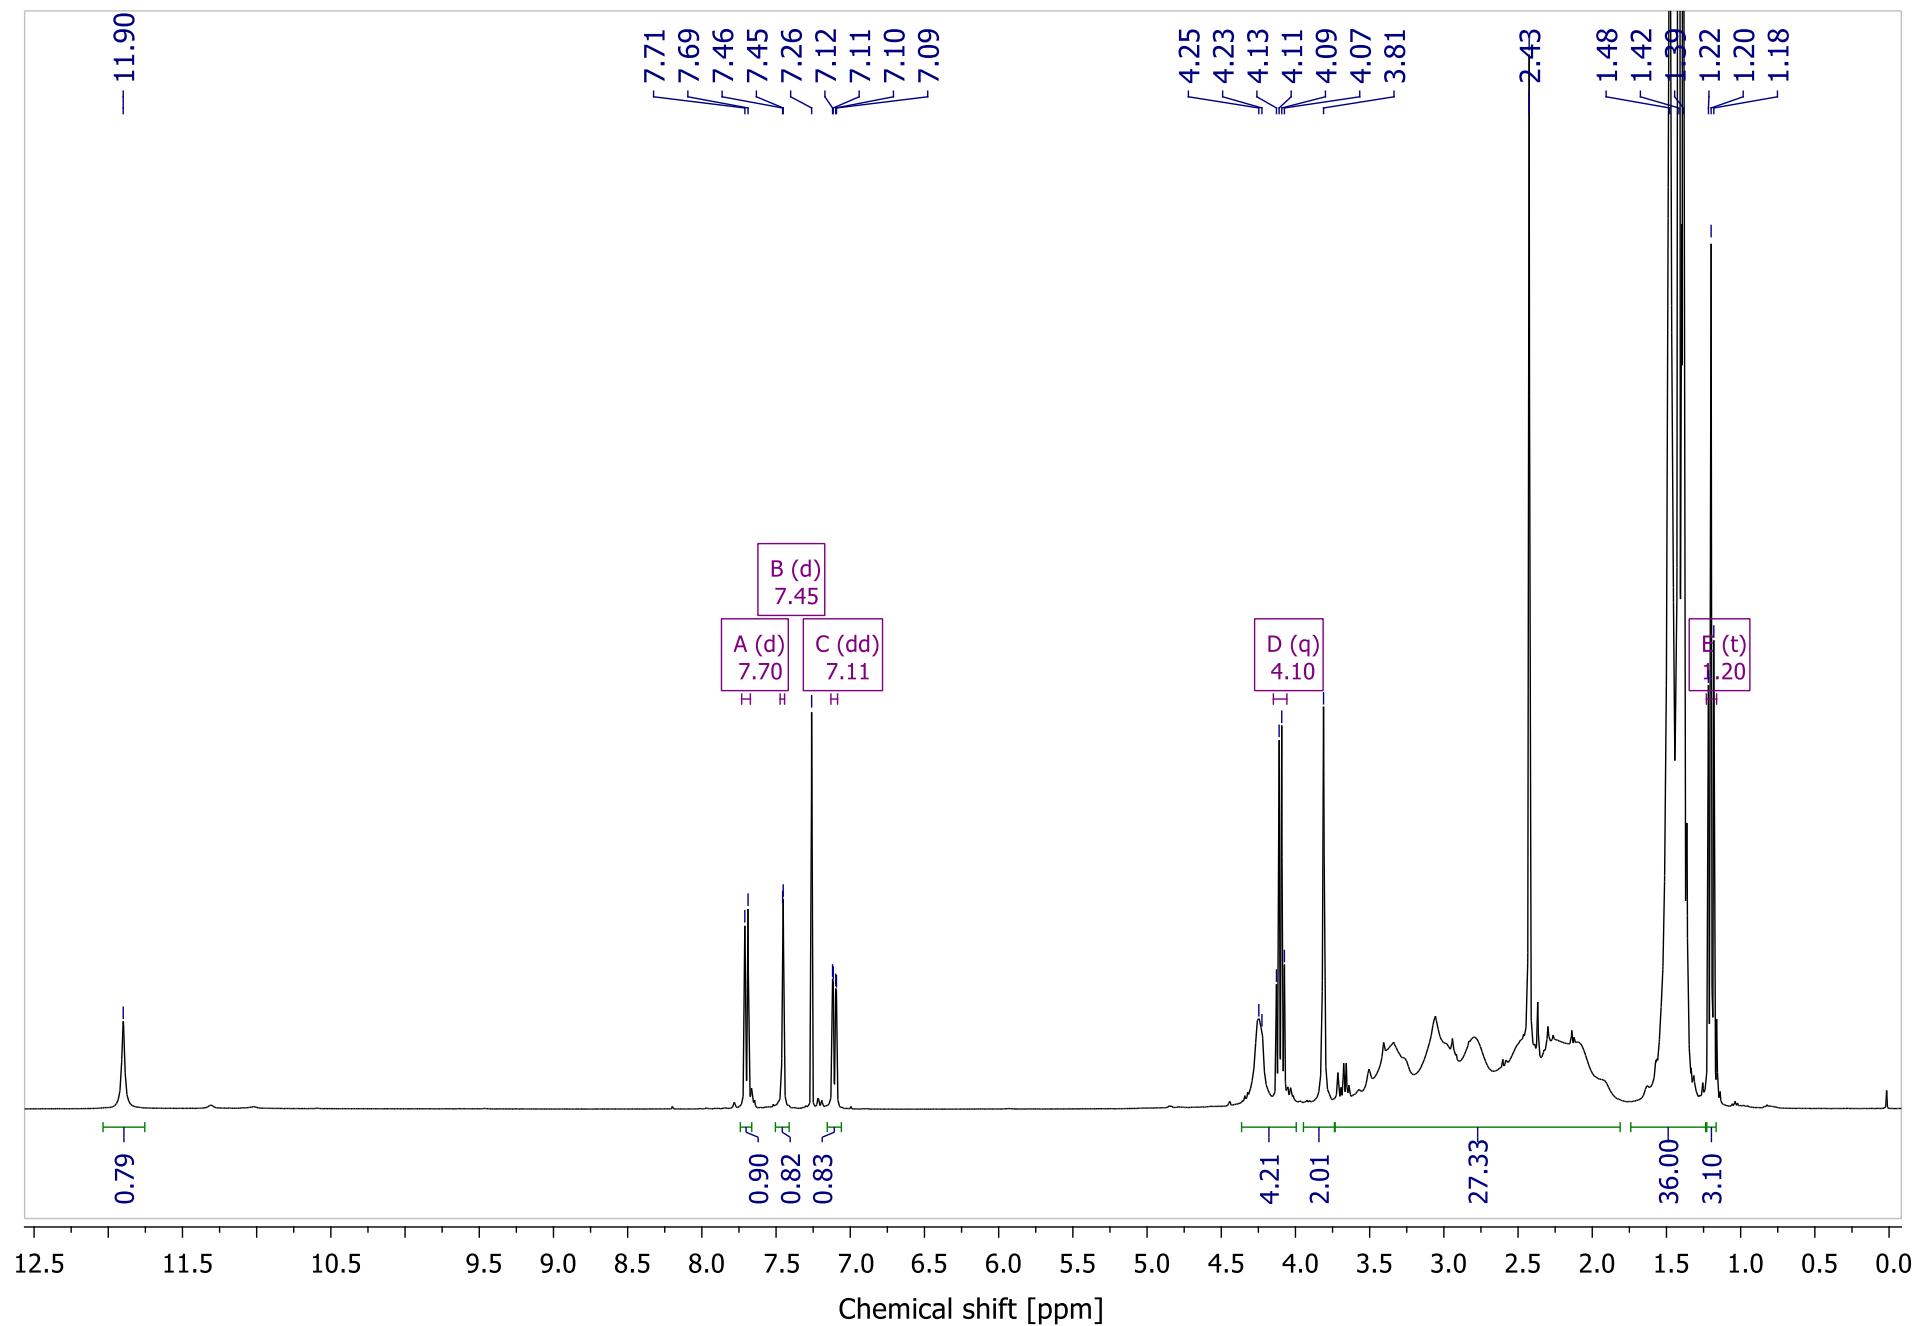

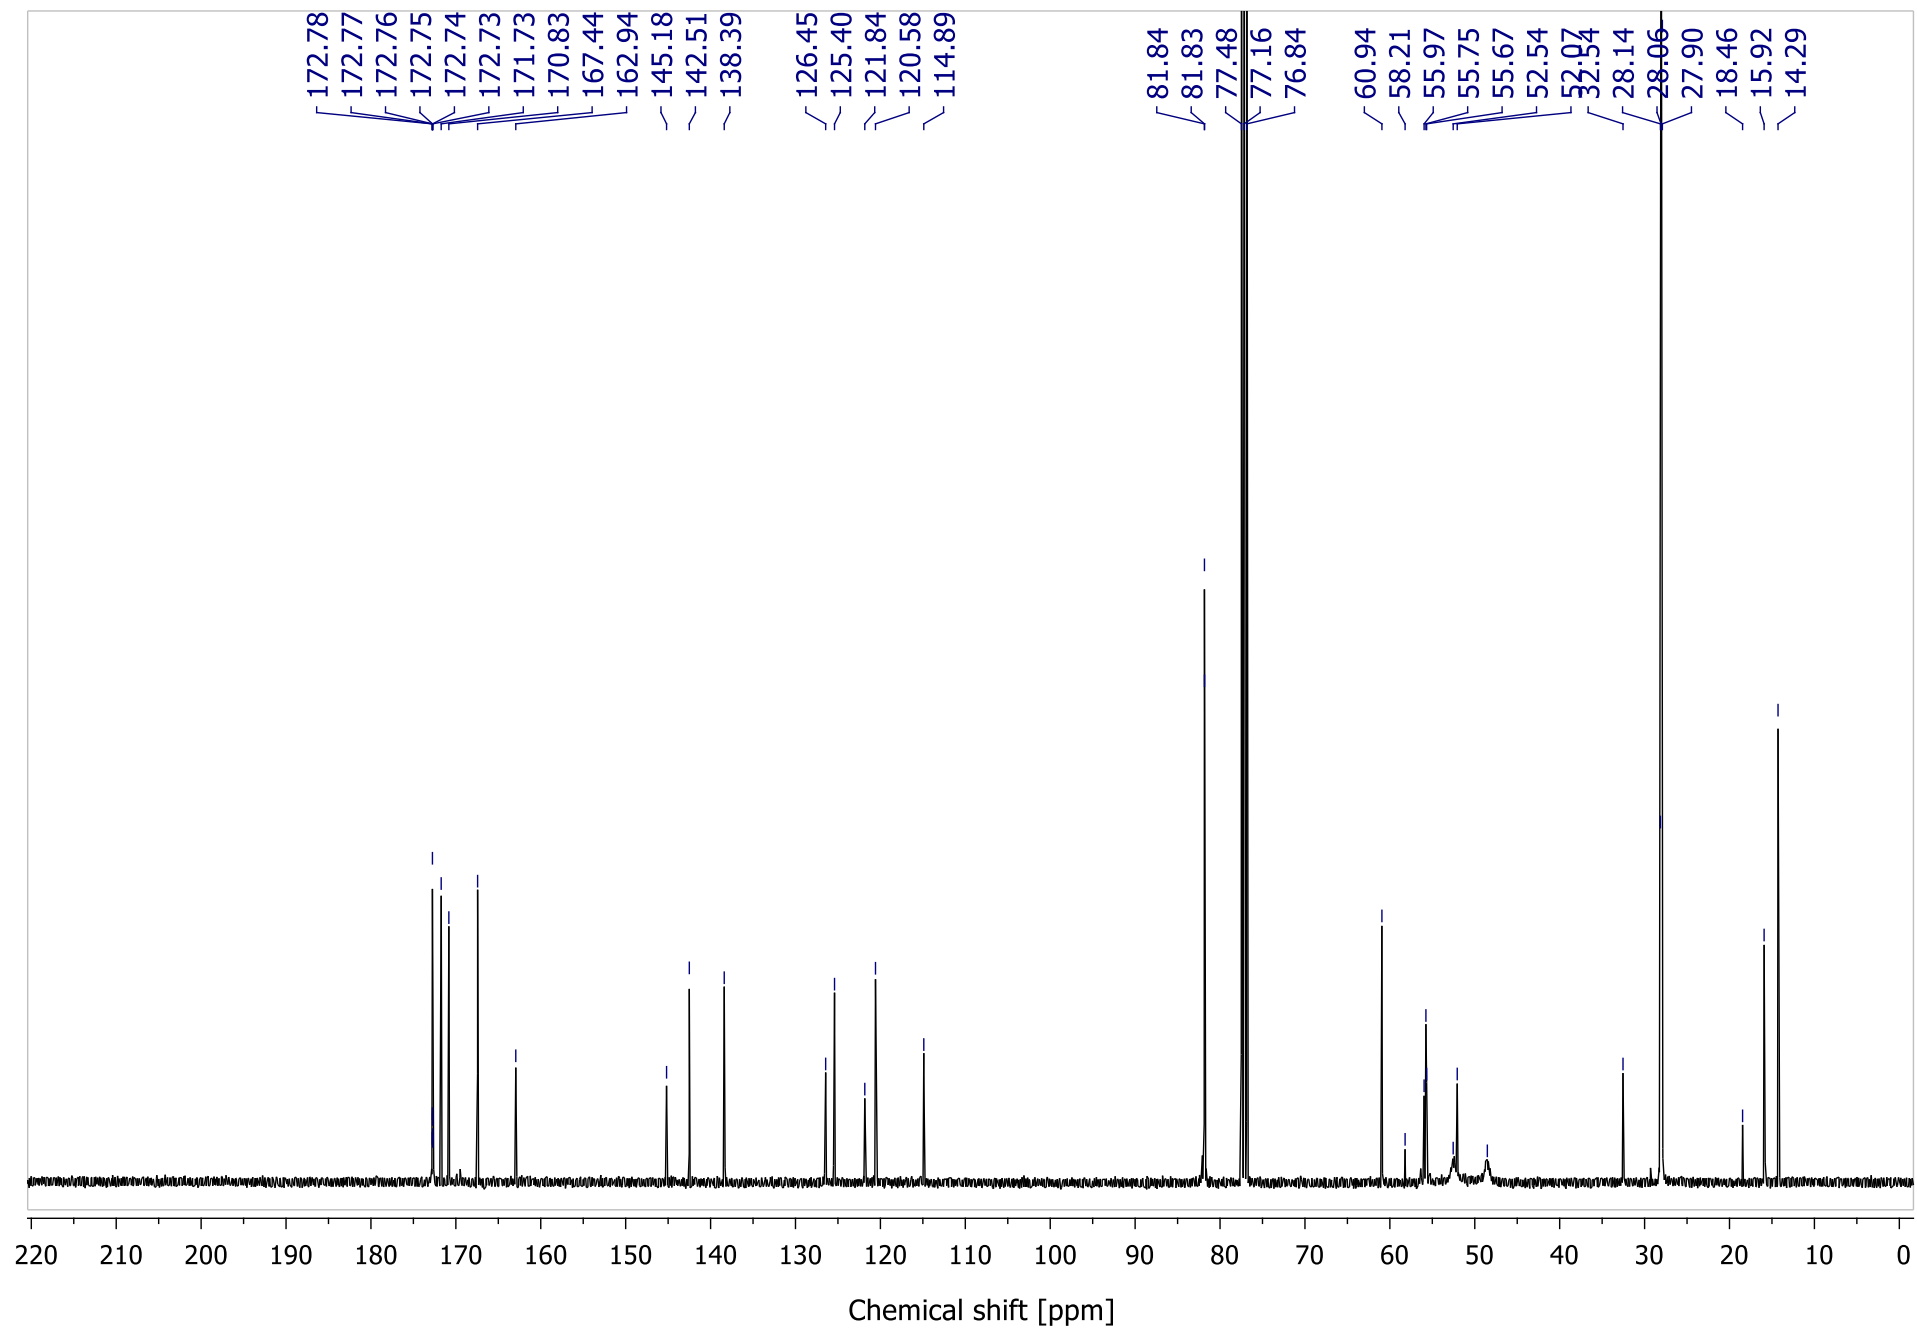



# DKS57\_076A

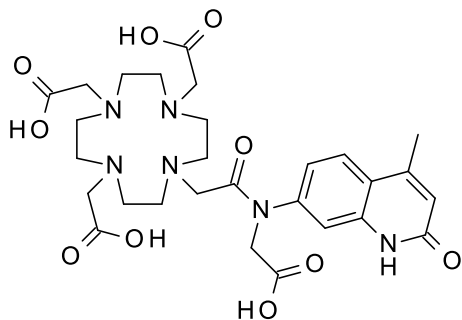

Formula Weight : 618.64(2)

Exact Mass : 618.26494

Formula :  $C_{28}H_{38}N_6O_{10}$

Composition : C 54.36% H 6.19% N 13.58% O 25.86%

C:\Xcalibur\...\DKS57\_076A\_1050\_5um

3/10/2018 5:18:16 PM

RT: 0.00 - 16.00

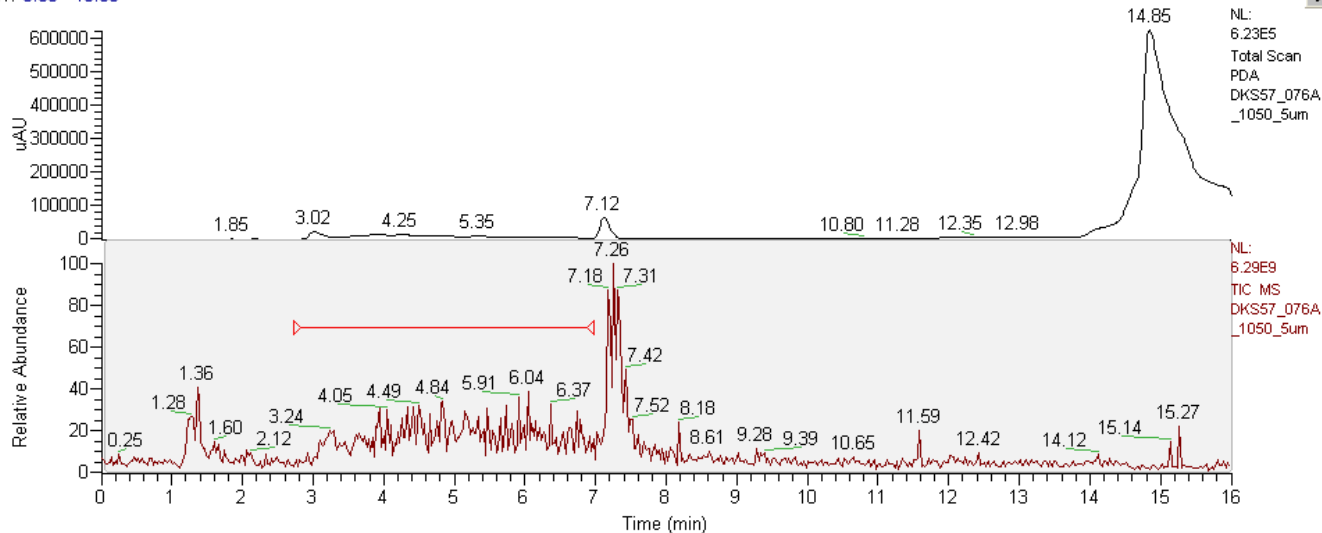

DKS57\_076A\_1050\_5um #426 RT: 7.10 AV: 1 NL: 3.41E5 microAU

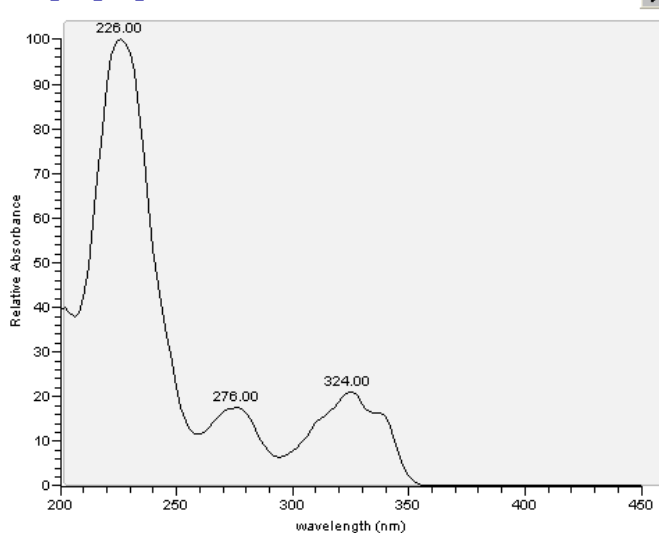

DKS57\_076A\_1050\_5um #105-259 RT: 2.81-6.87 AV: 155 NL: 1.39E8

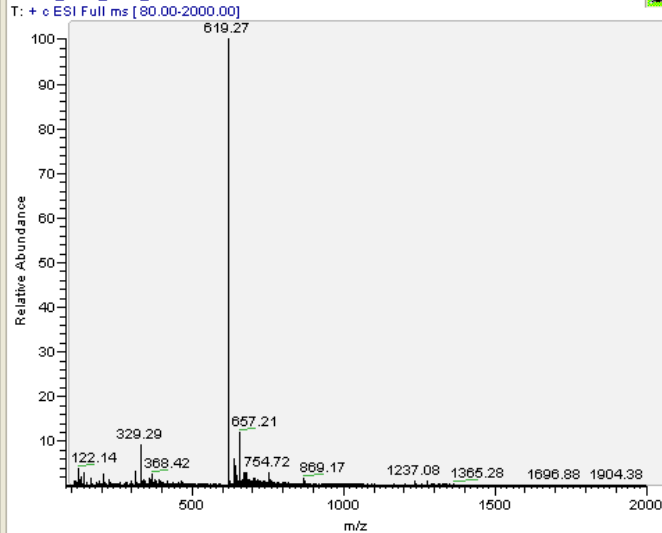

RT: 0.00 - 16.00

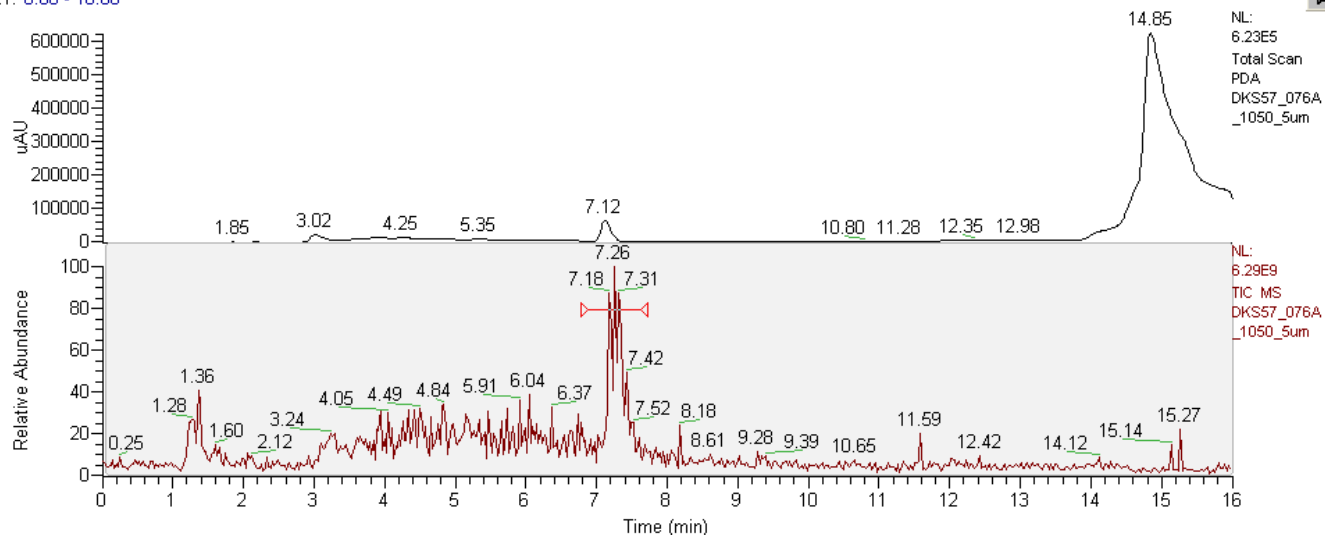

DKS57\_076A\_1050\_5um #426 RT: 7.10 AV: 1 NL: 3.41E5 microAU

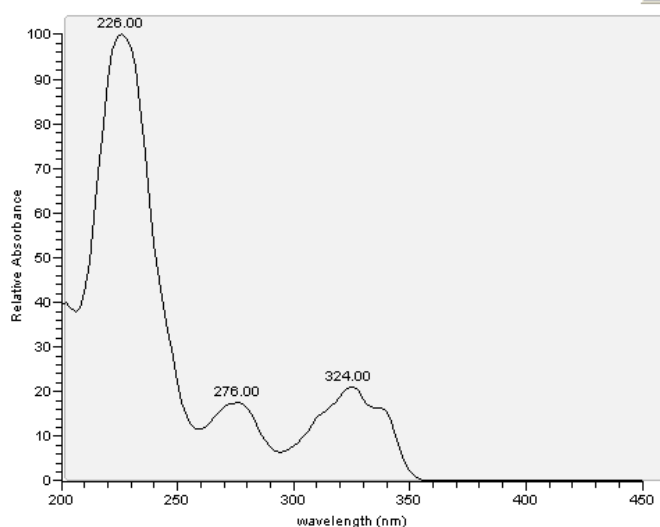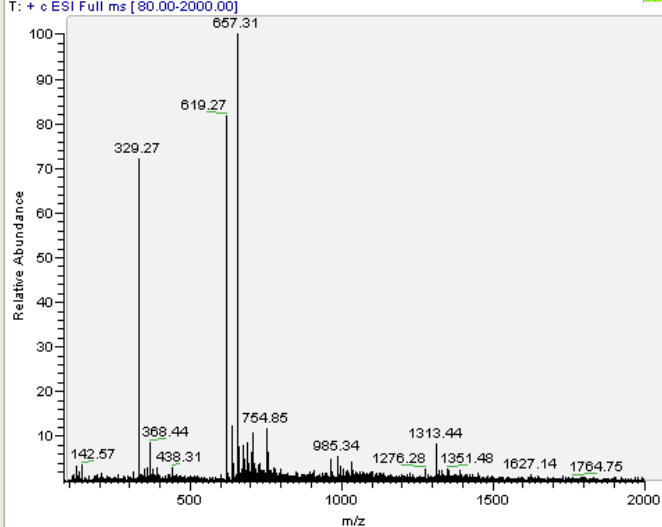

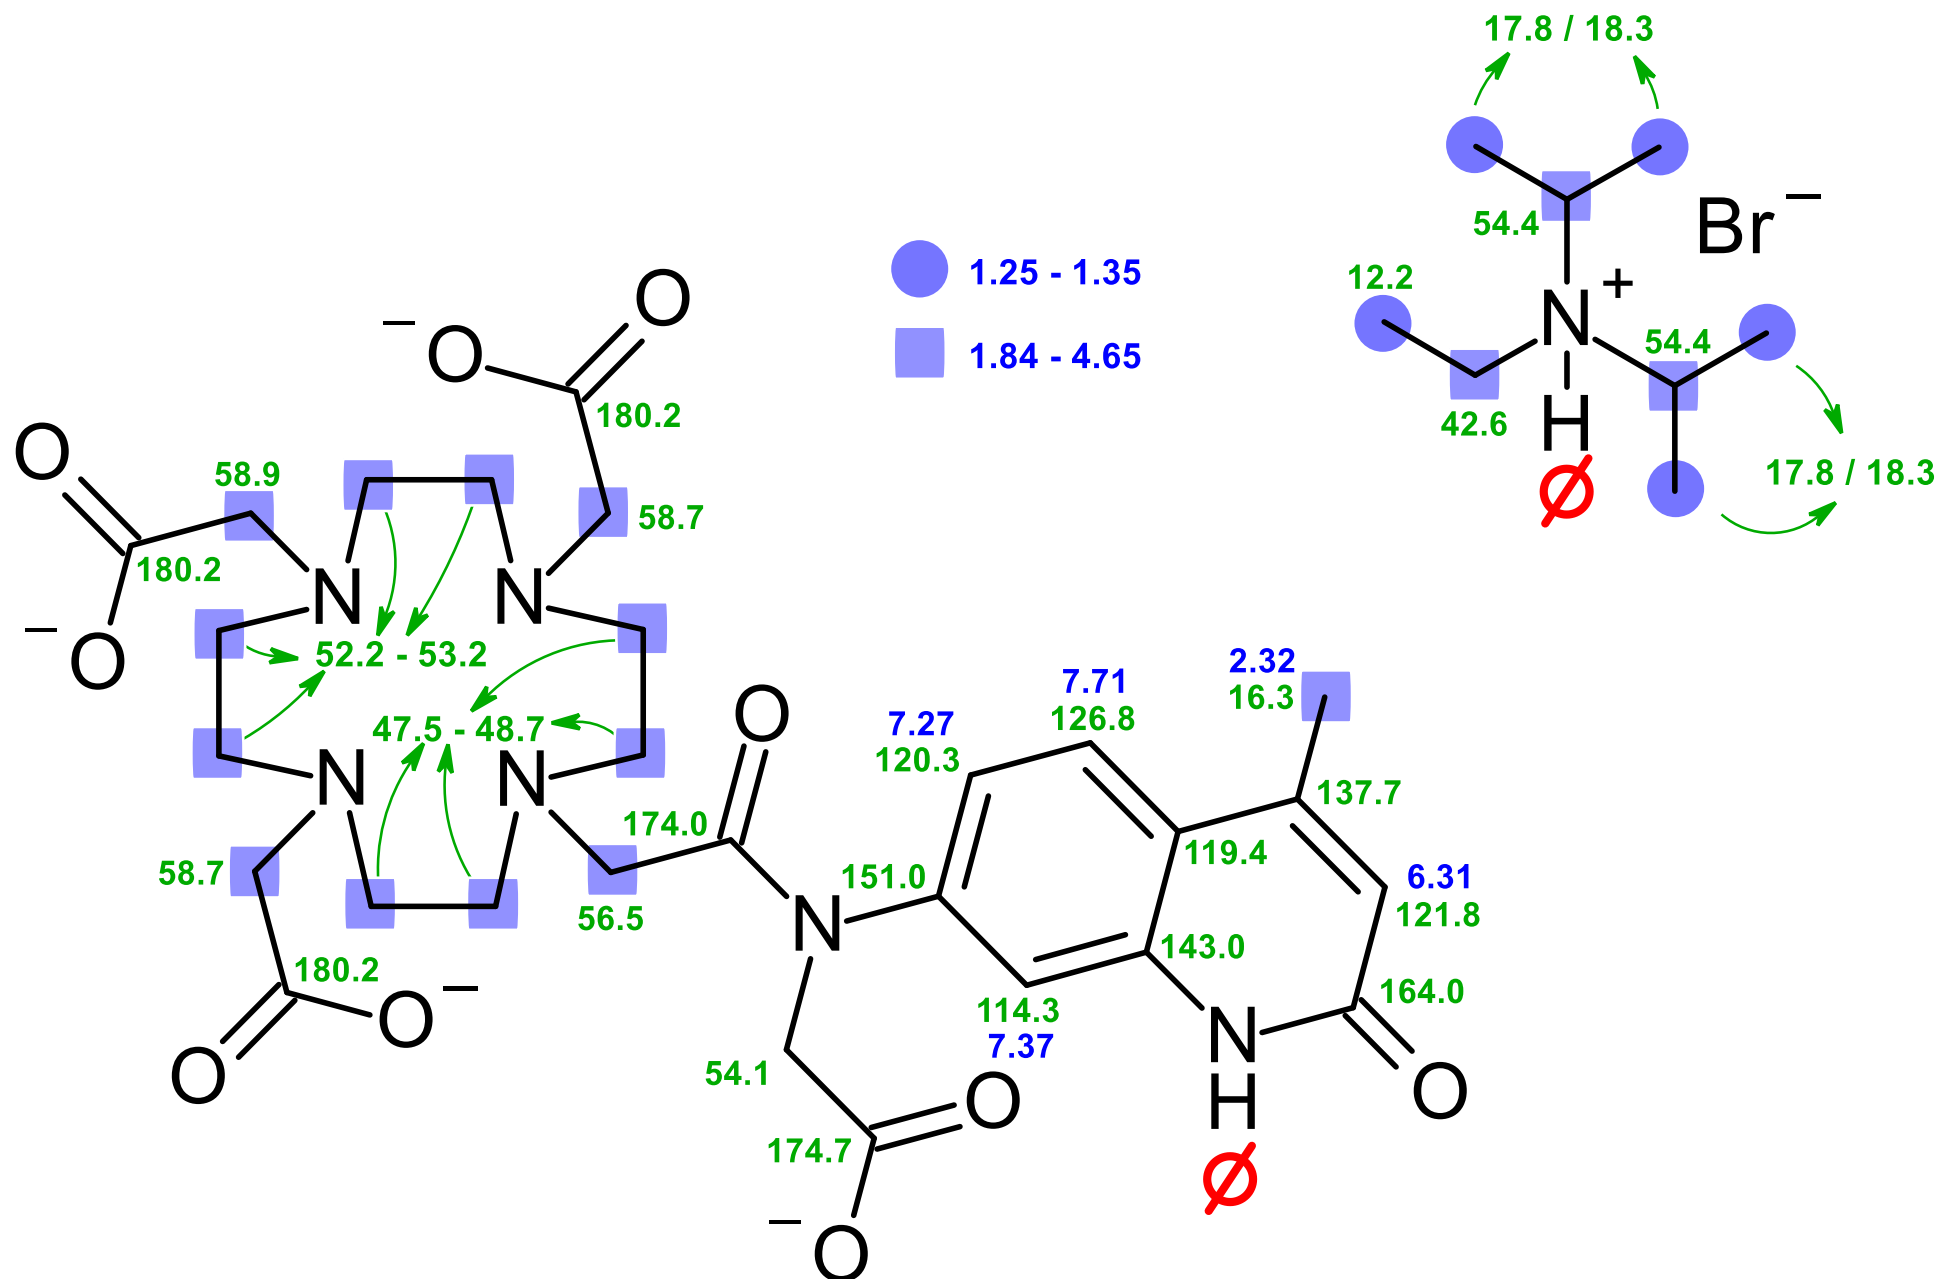

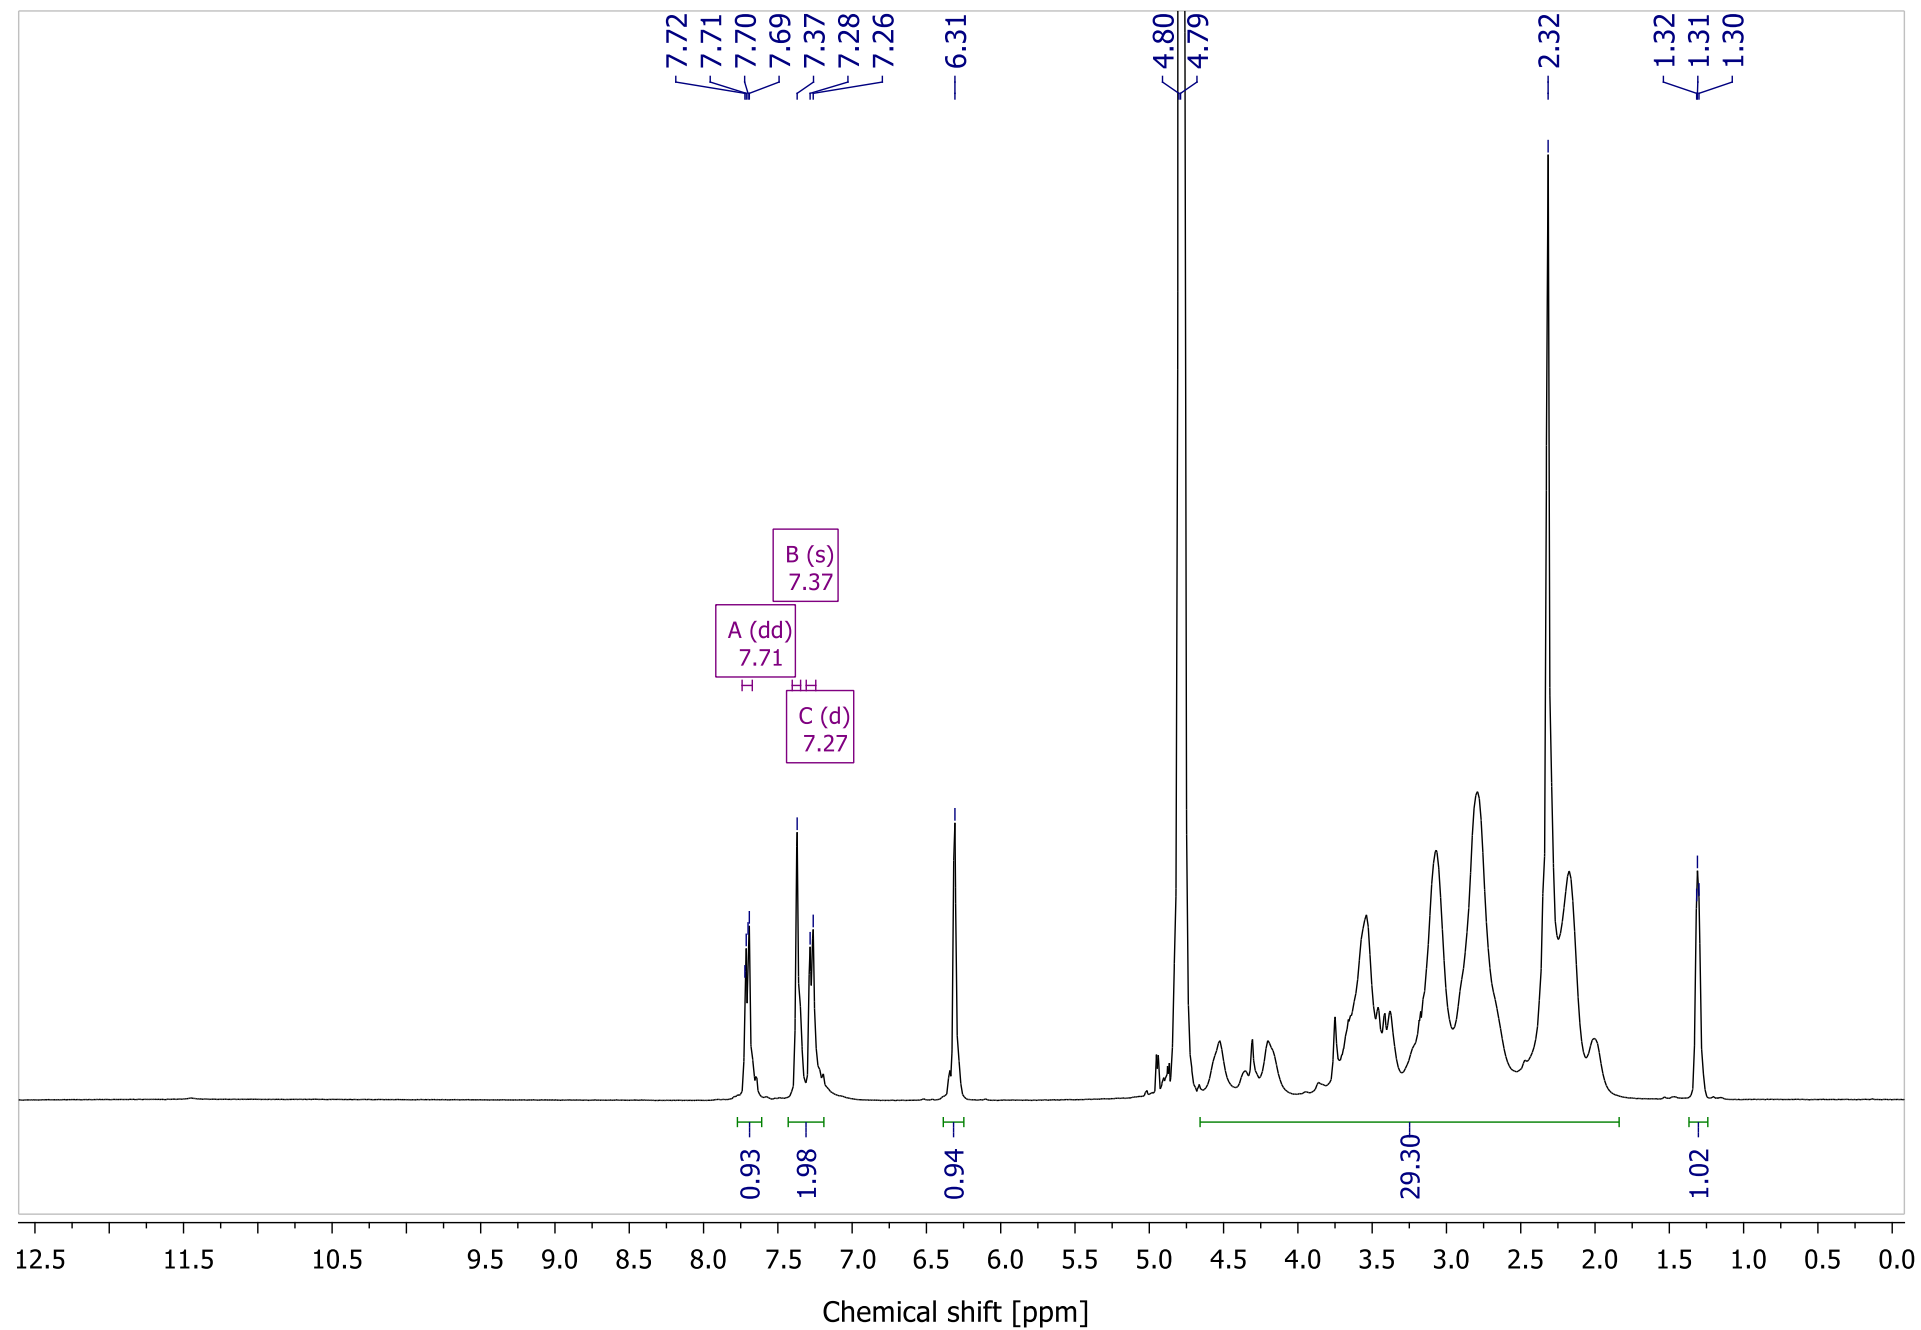

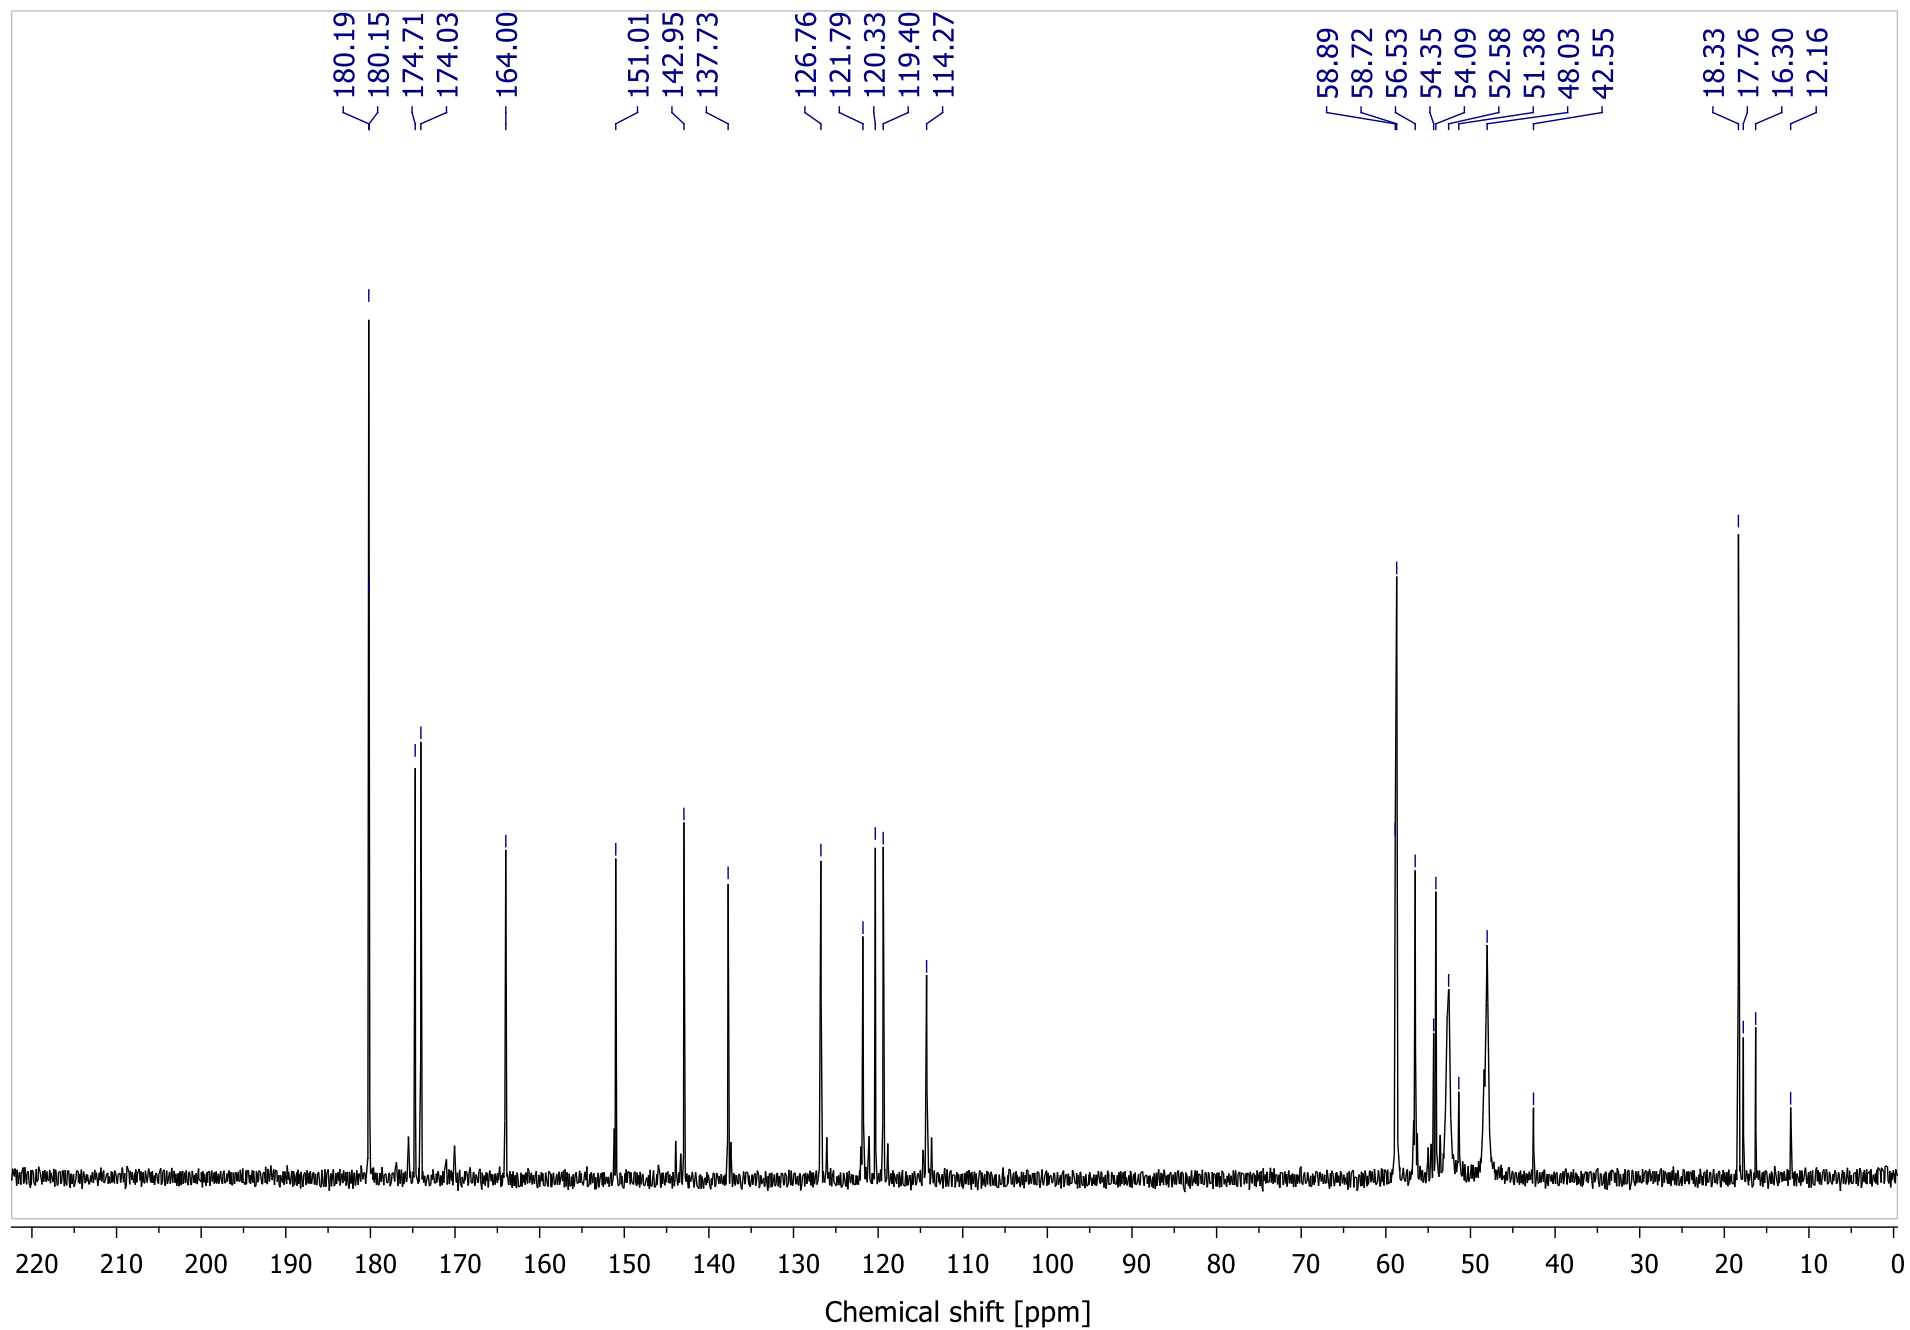

# DKS57\_077A

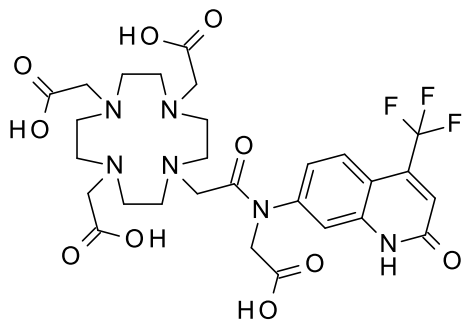

Formula Weight : 672.61(2)

Exact Mass : 672.23668

Formula :  $C_{28}H_{35}F_3N_6O_{10}$

Composition : C 50.00% H 5.24% N 12.49%  
O 23.79% F 8.47%

C:\Xcalibur\...\DKS57\_077A\_1050\_5um

3/10/2018 5:35:06 PM

RT: 0.00 - 16.53

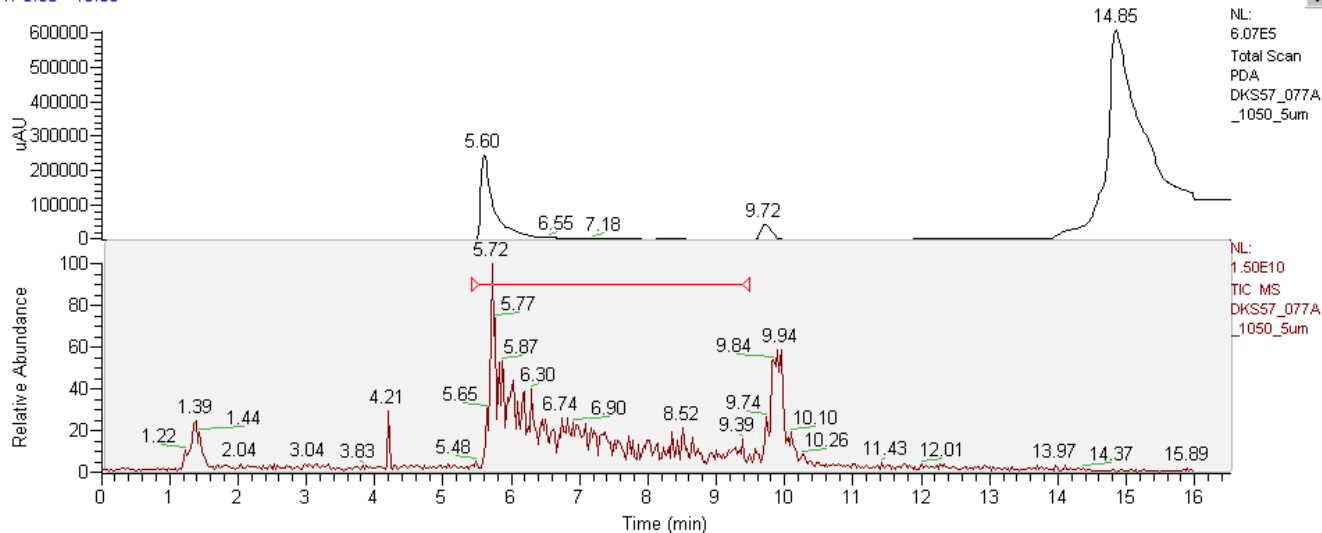

DKS57\_077A\_1050\_5um #327-350 RT: 5.45-5.83 AV: 24 NL: 4.72E5 microAU

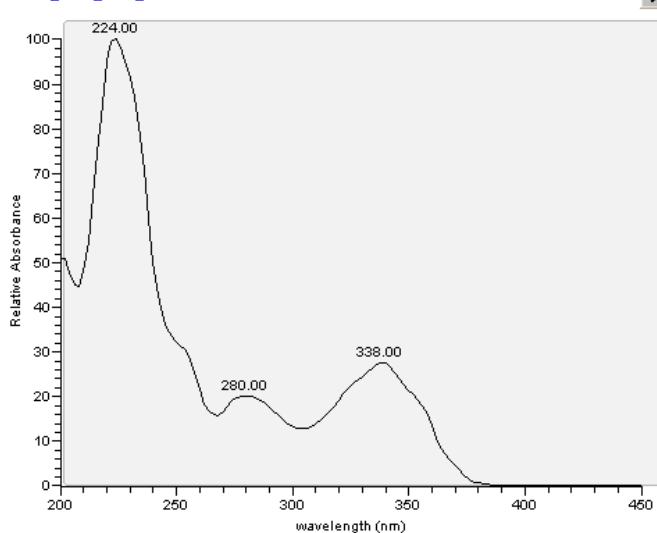

DKS57\_077A\_1050\_5um #204-351 RT: 5.51-9.36 AV: 148 NL: 6.70E8

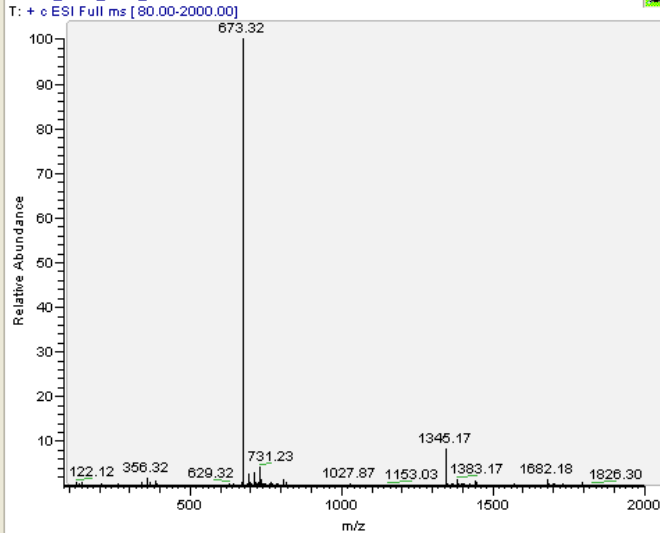

RT: 0.00 - 16.53

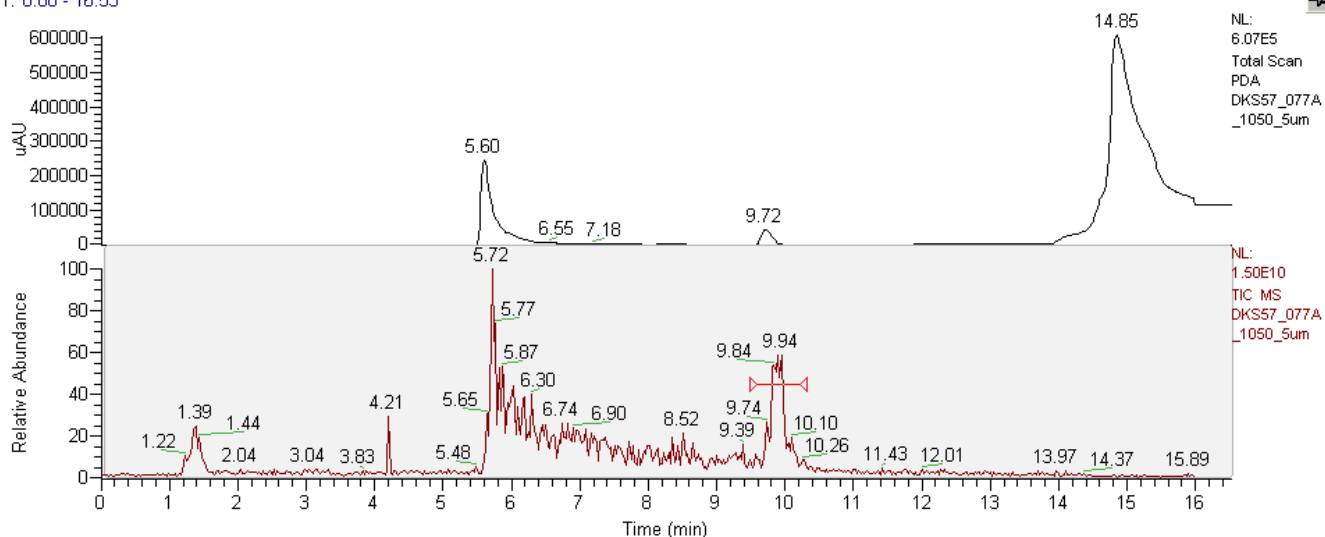

DKS57\_077A\_1050\_5um #327-350 RT: 5.45-5.83 AV: 24 NL: 4.72E5 microAU

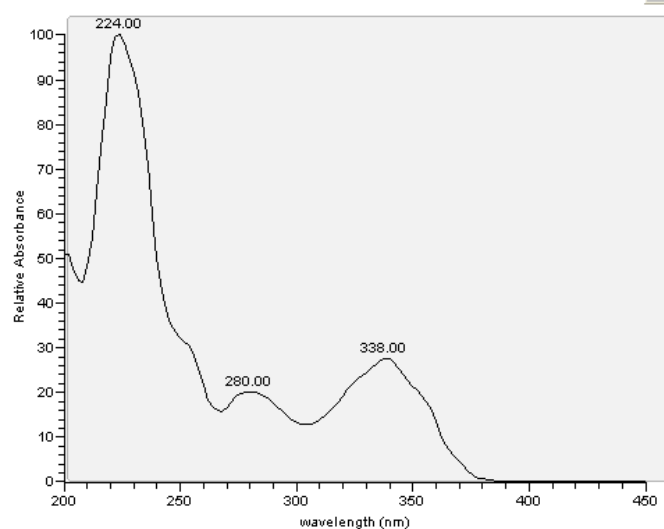DKS57\_077A\_1050\_5um #359-383 RT: 9.57-10.20 AV: 25 NL: 3.37E8  
T: + e ESI Full ms [80.00-2000.00]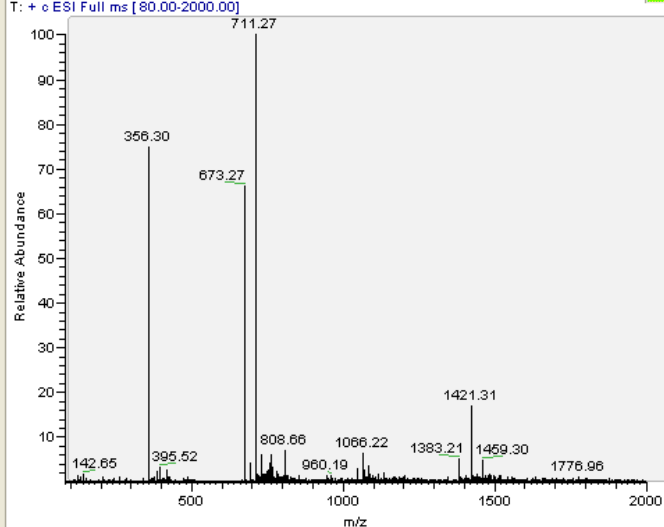





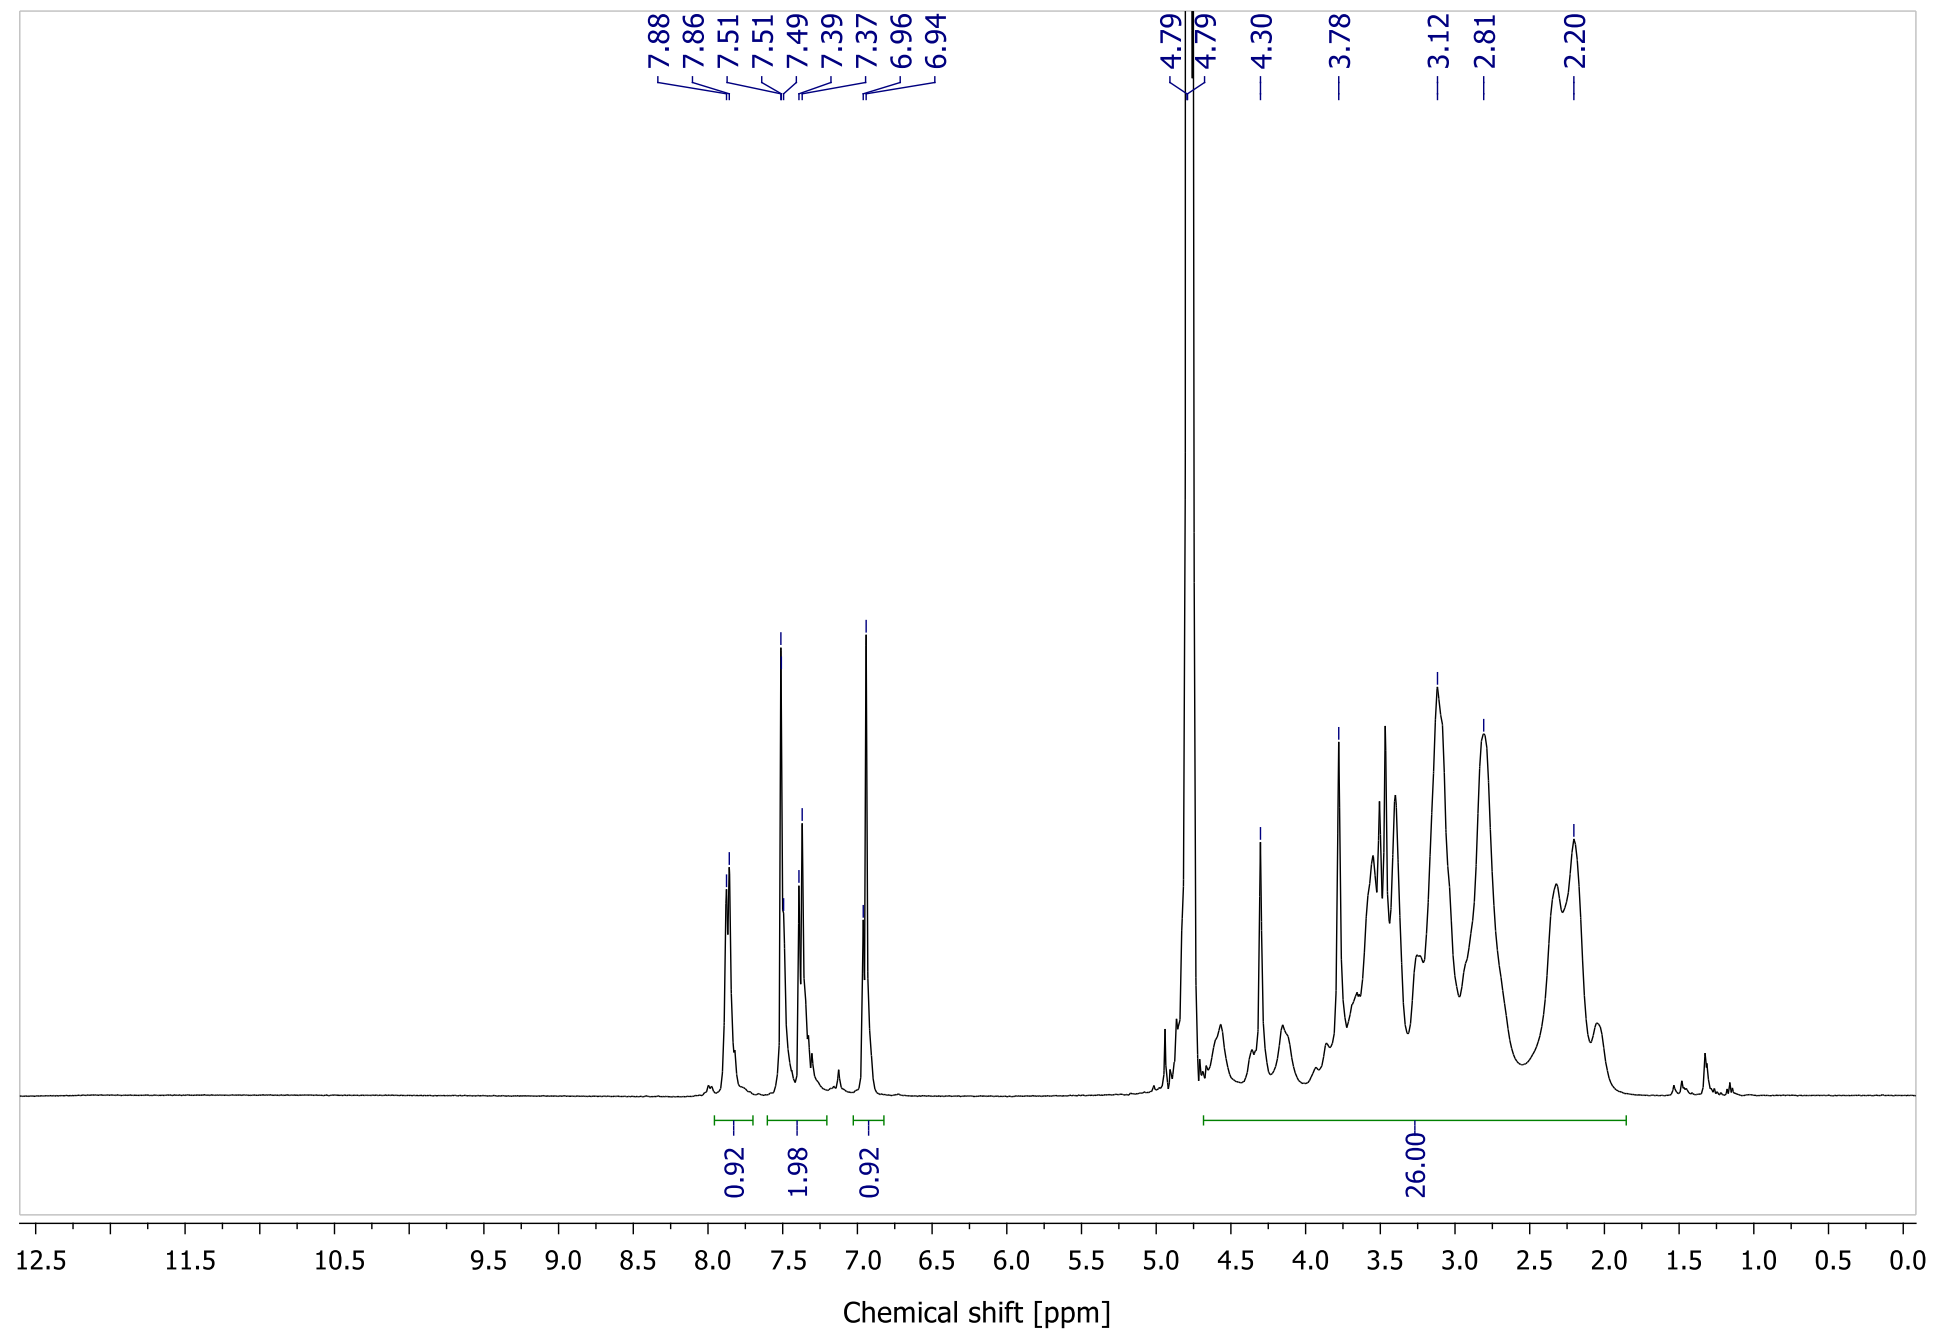

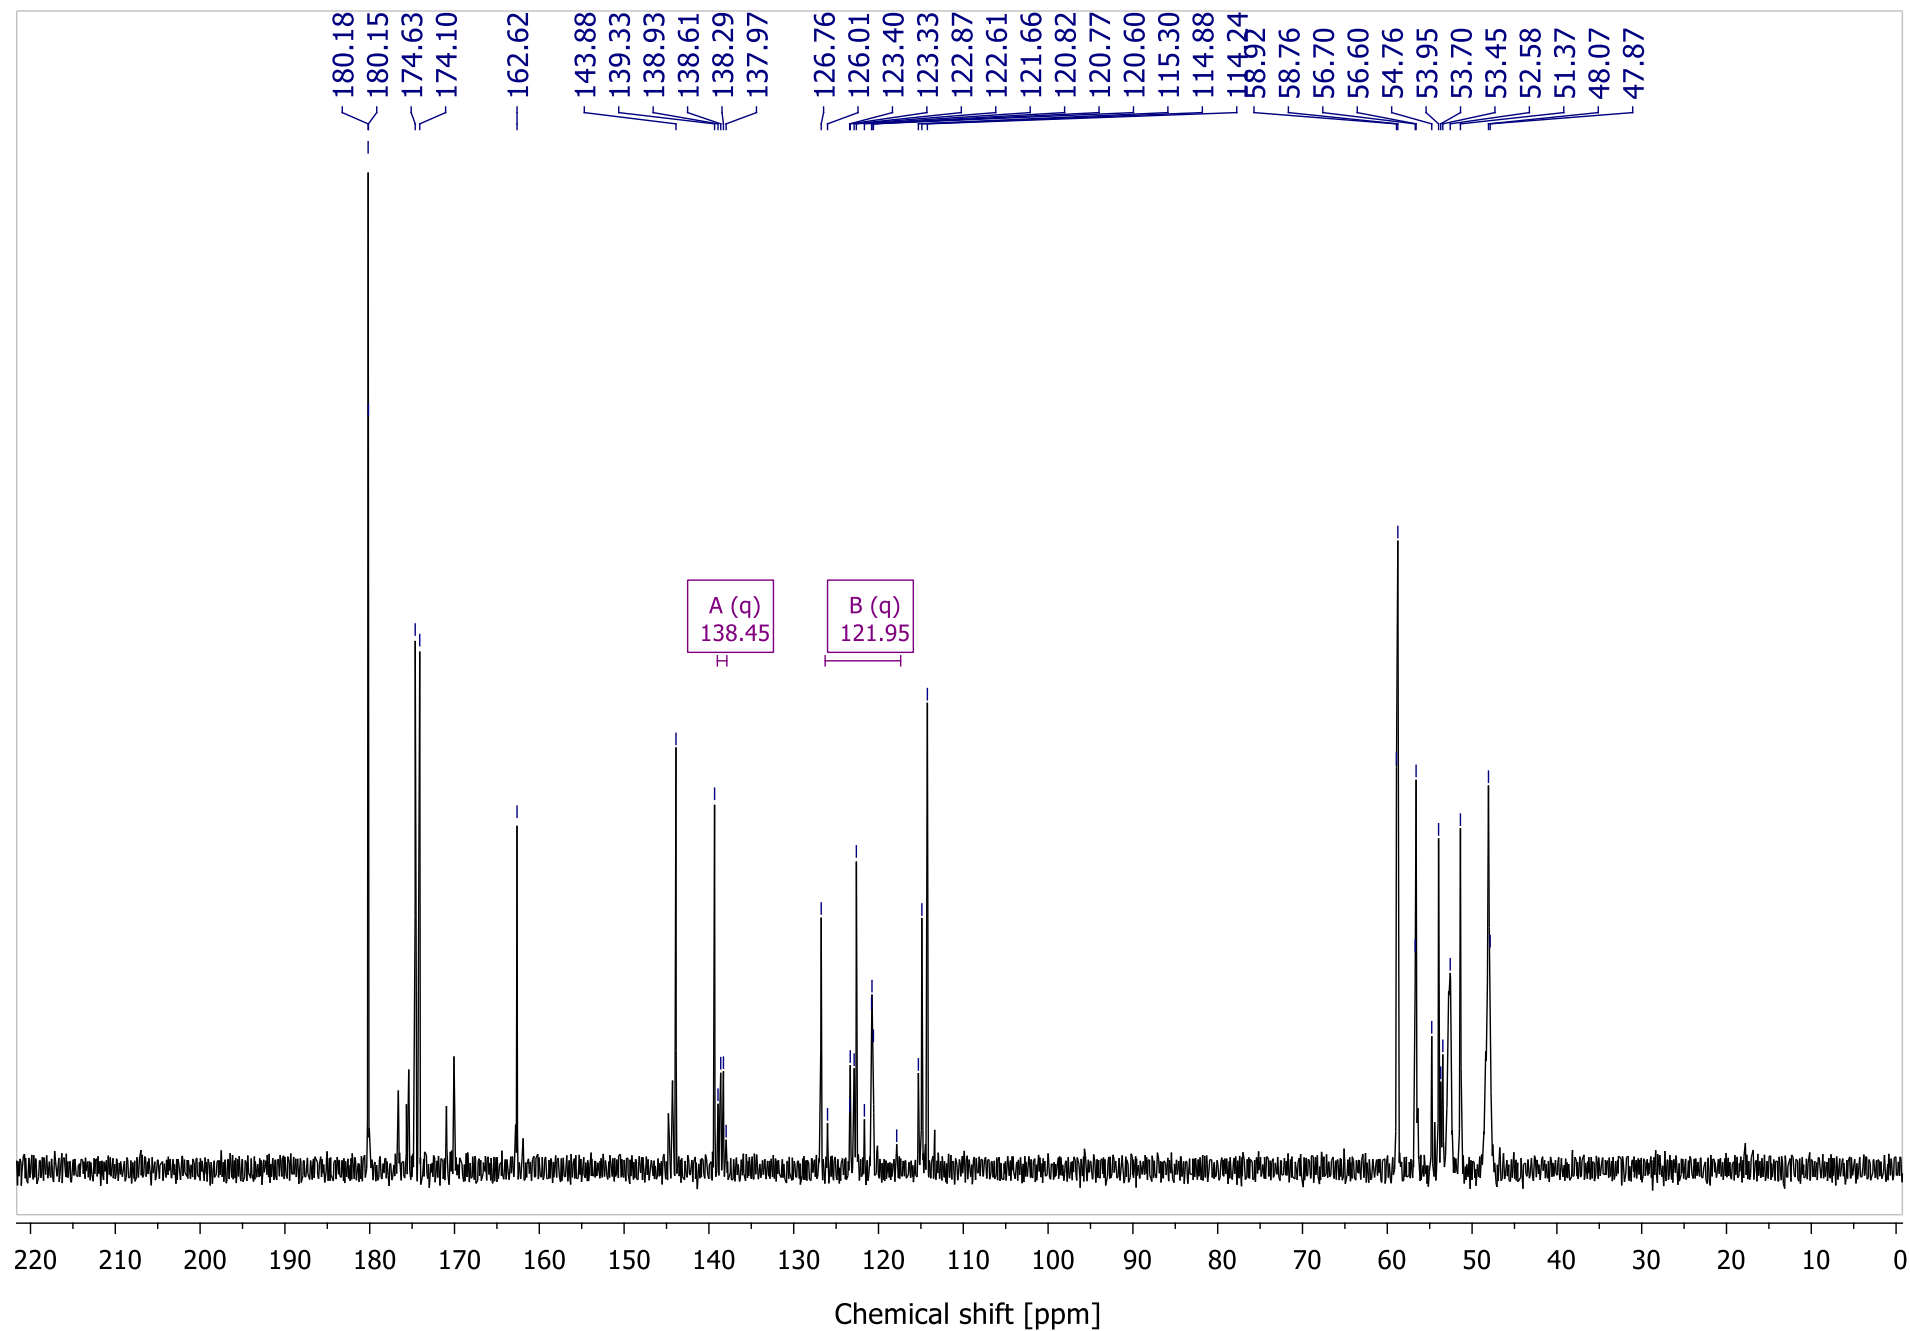

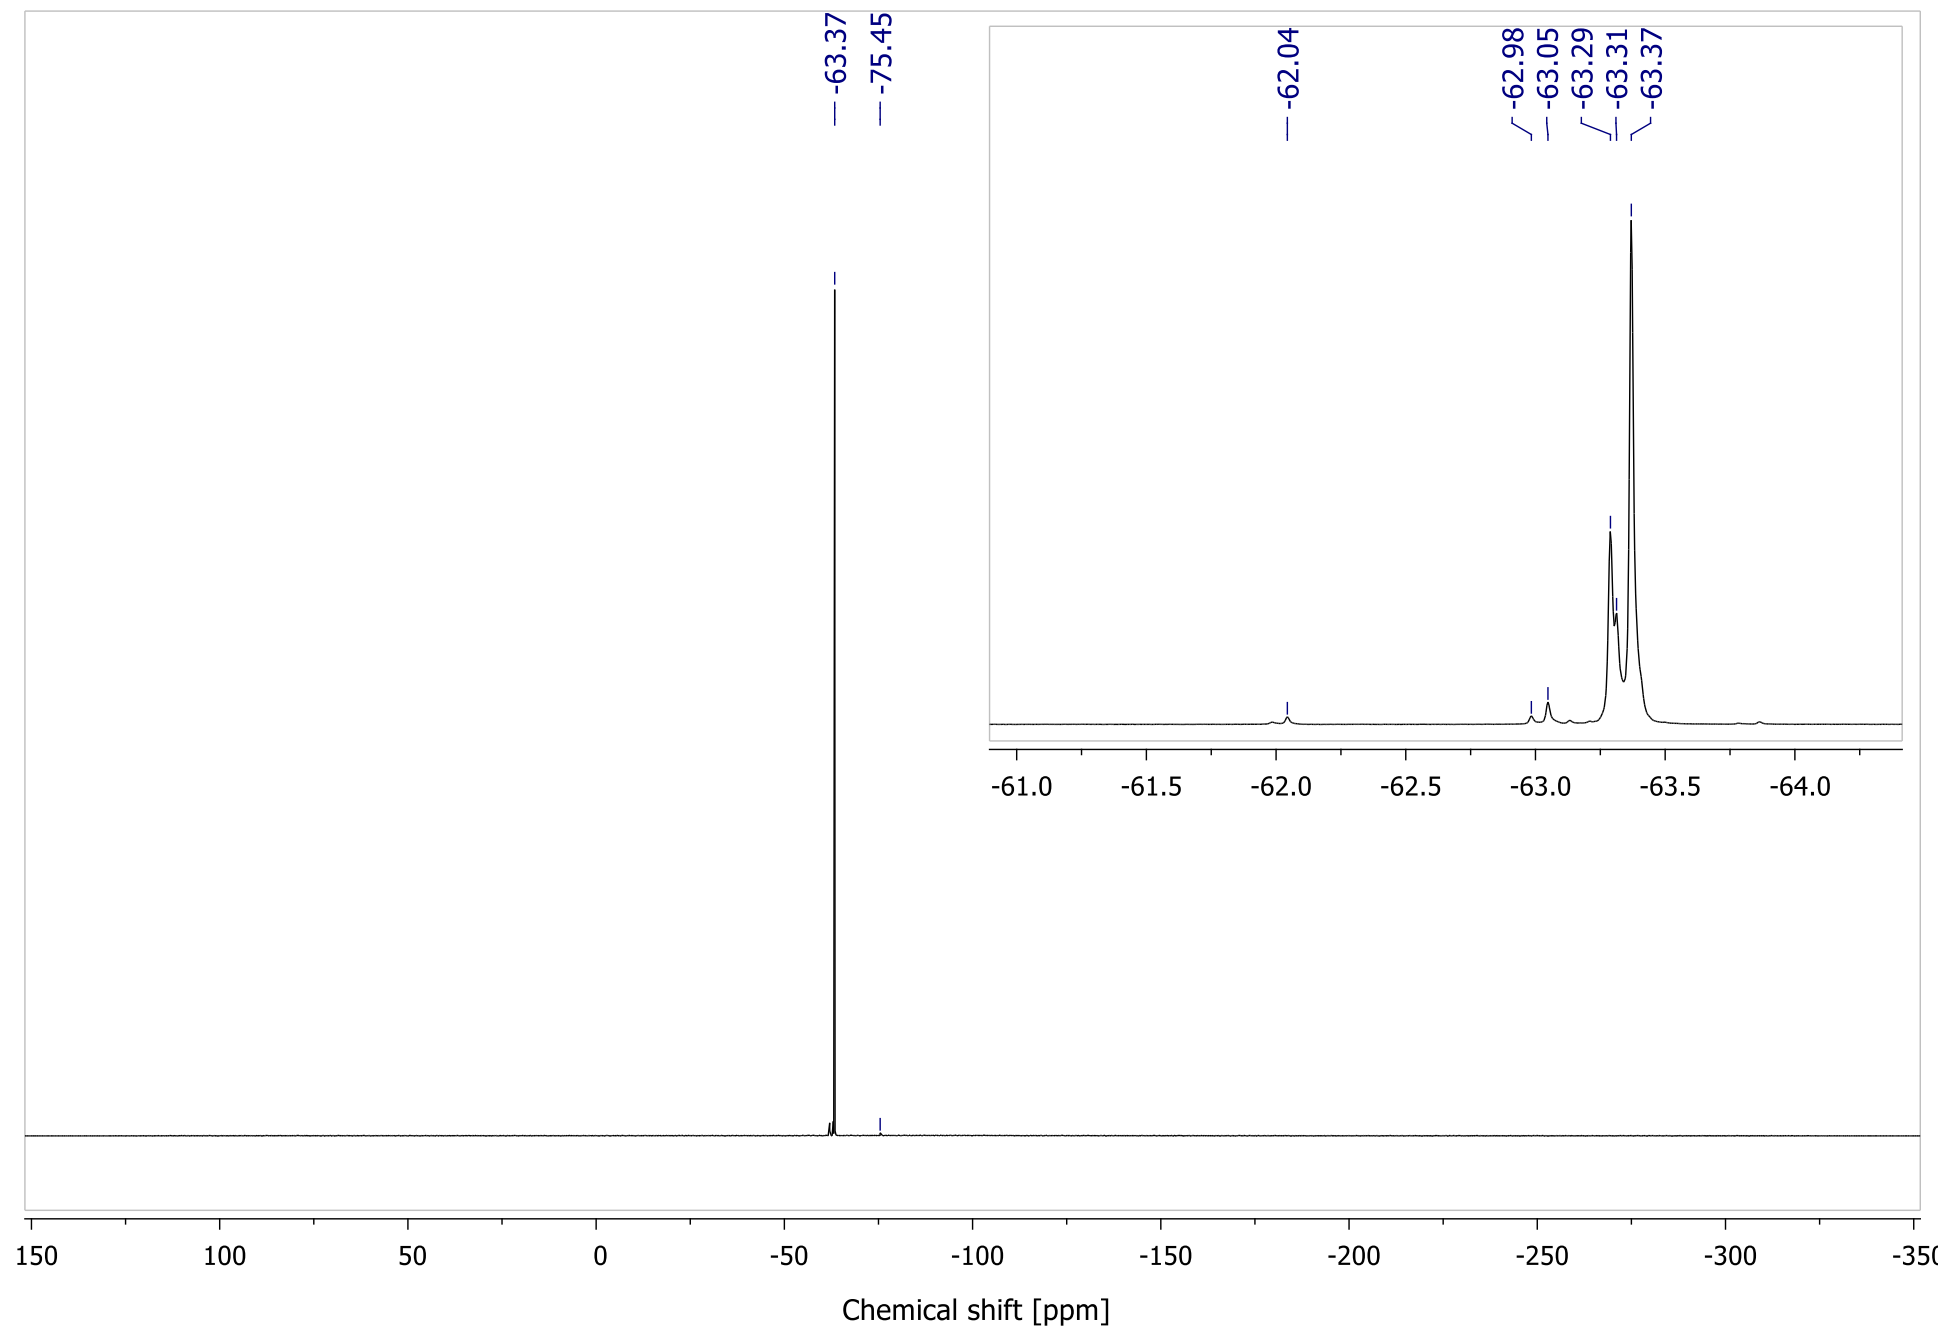

# DKS57\_079A

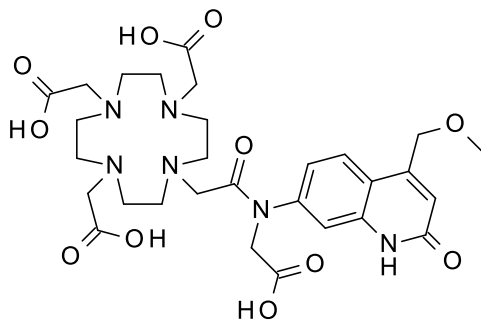

Formula Weight : 648.66(2)

Exact Mass : 648.27551

Formula :  $C_{29}H_{40}N_6O_{11}$

Composition : C 53.70% H 6.22% N 12.96% O 27.13%

C:\Xcalibur\...\DKS57\_079A\_1050\_5um

3/10/2018 6:08:29 PM

RT: 0.00 - 16.53

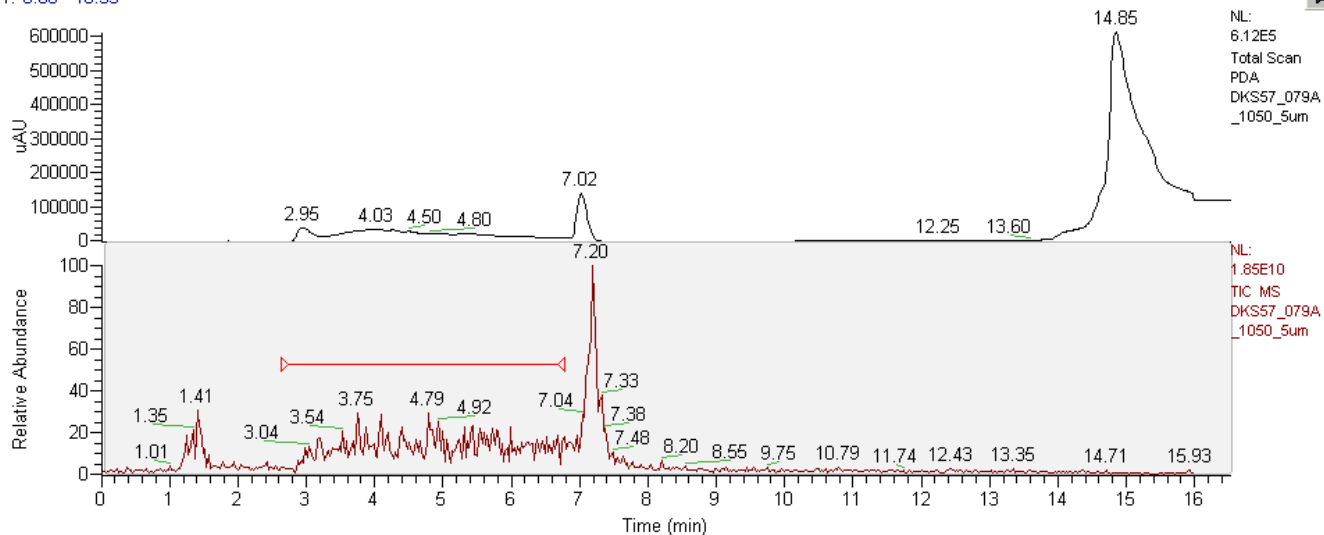

DKS57\_079A\_1050\_5um #416-430 RT: 6.93-7.17 AV: 15 NL: 4.89E5 microAU

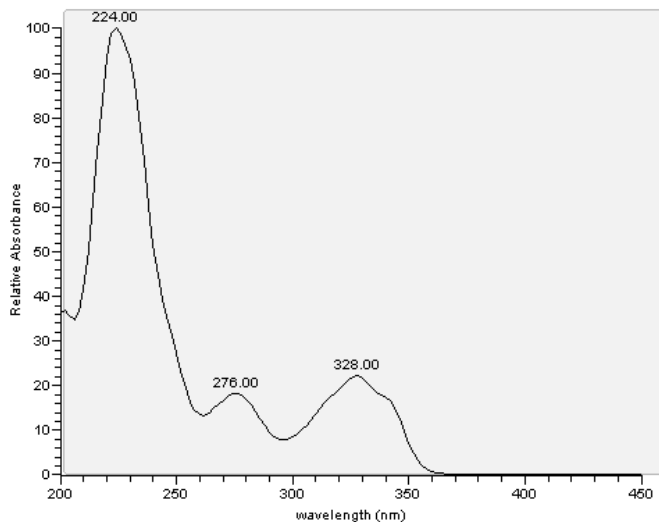

DKS57\_079A\_1050\_5um #102-253 RT: 2.72-6.67 AV: 152 NL: 3.44E8

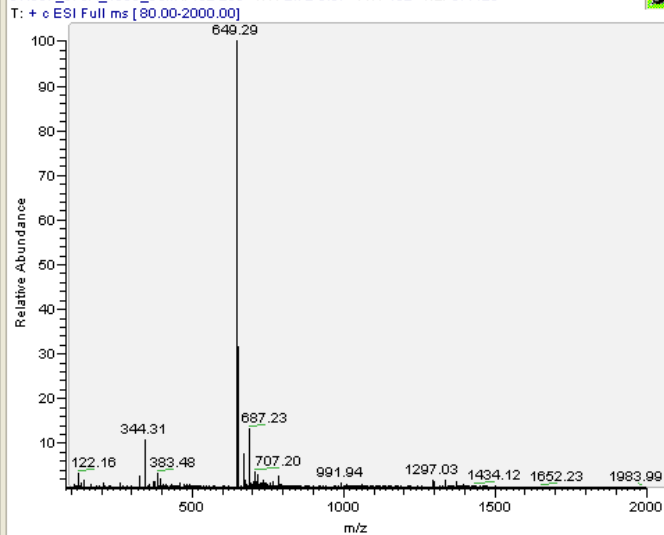

RT: 0.00 - 16.53

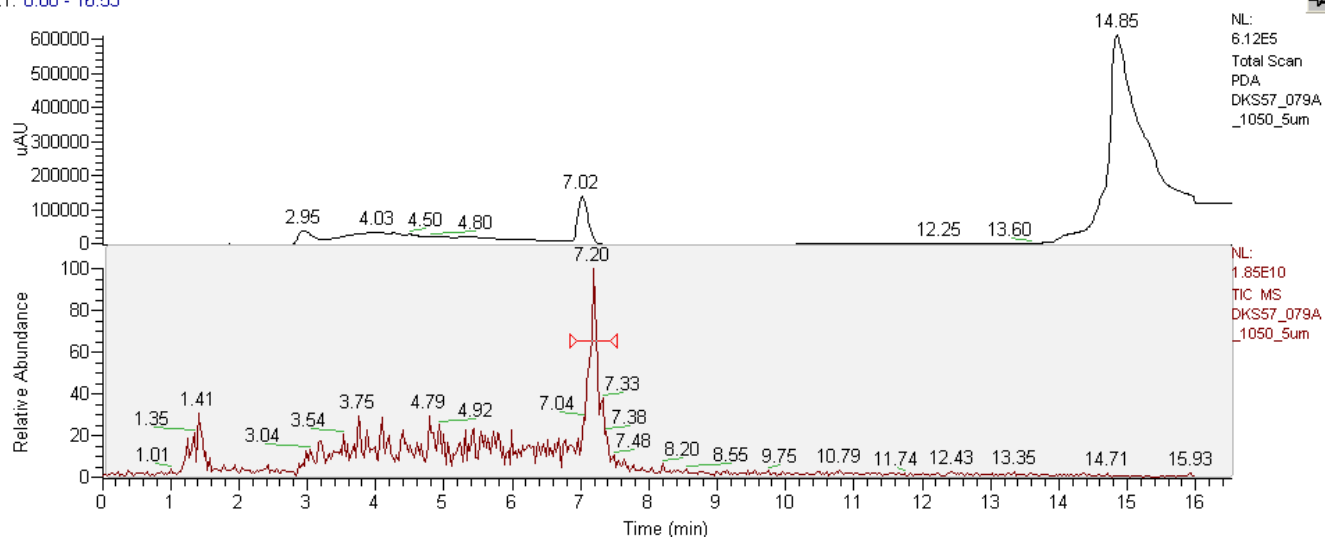

DKS57\_079A\_1050\_5um #416-430 RT: 6.93-7.17 AV: 15 NL: 4.89E5 microAU

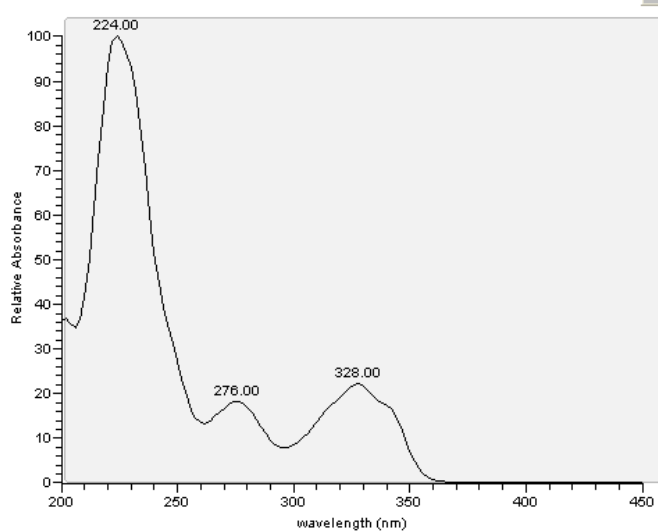DKS57\_079A\_1050\_5um #263-282 RT: 6.93-7.43 AV: 20 NL: 3.83E8  
T: + e ESI Full ms [80.00-2000.00]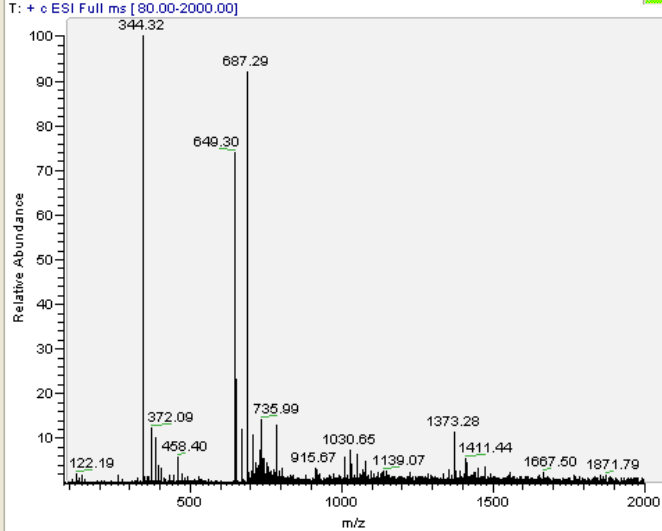

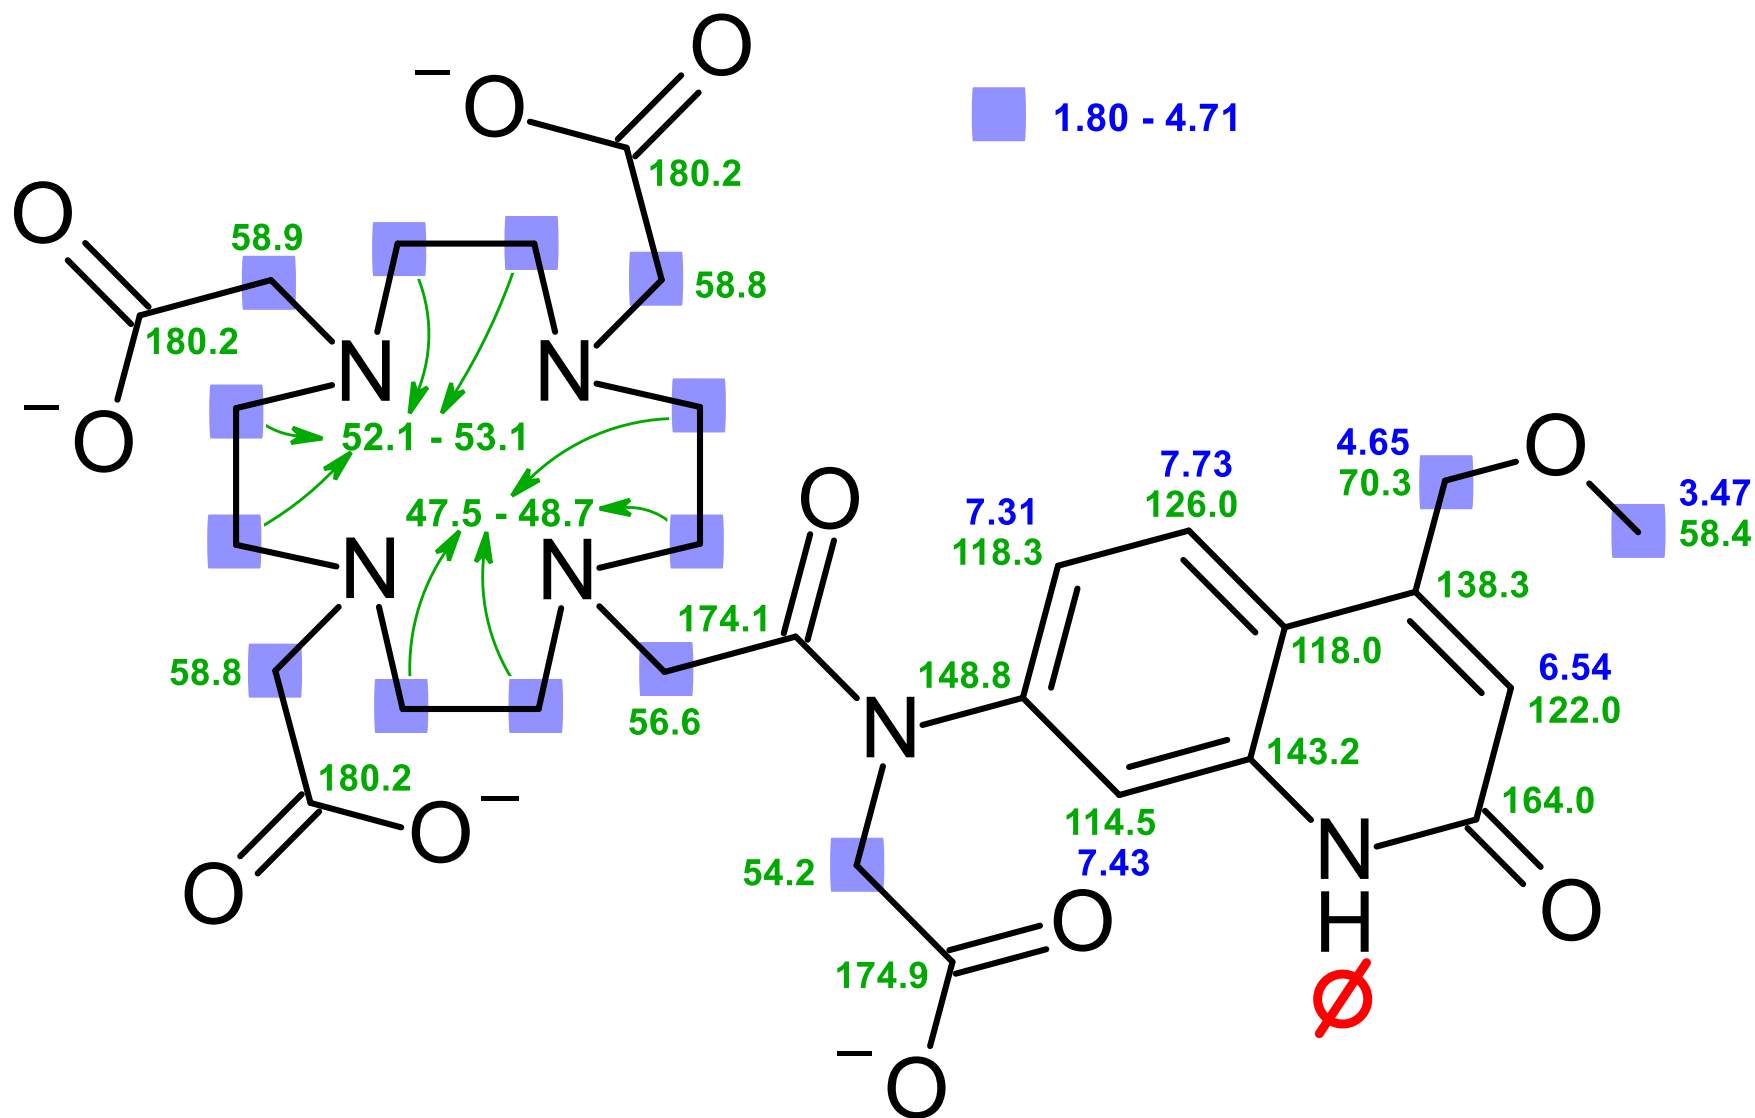

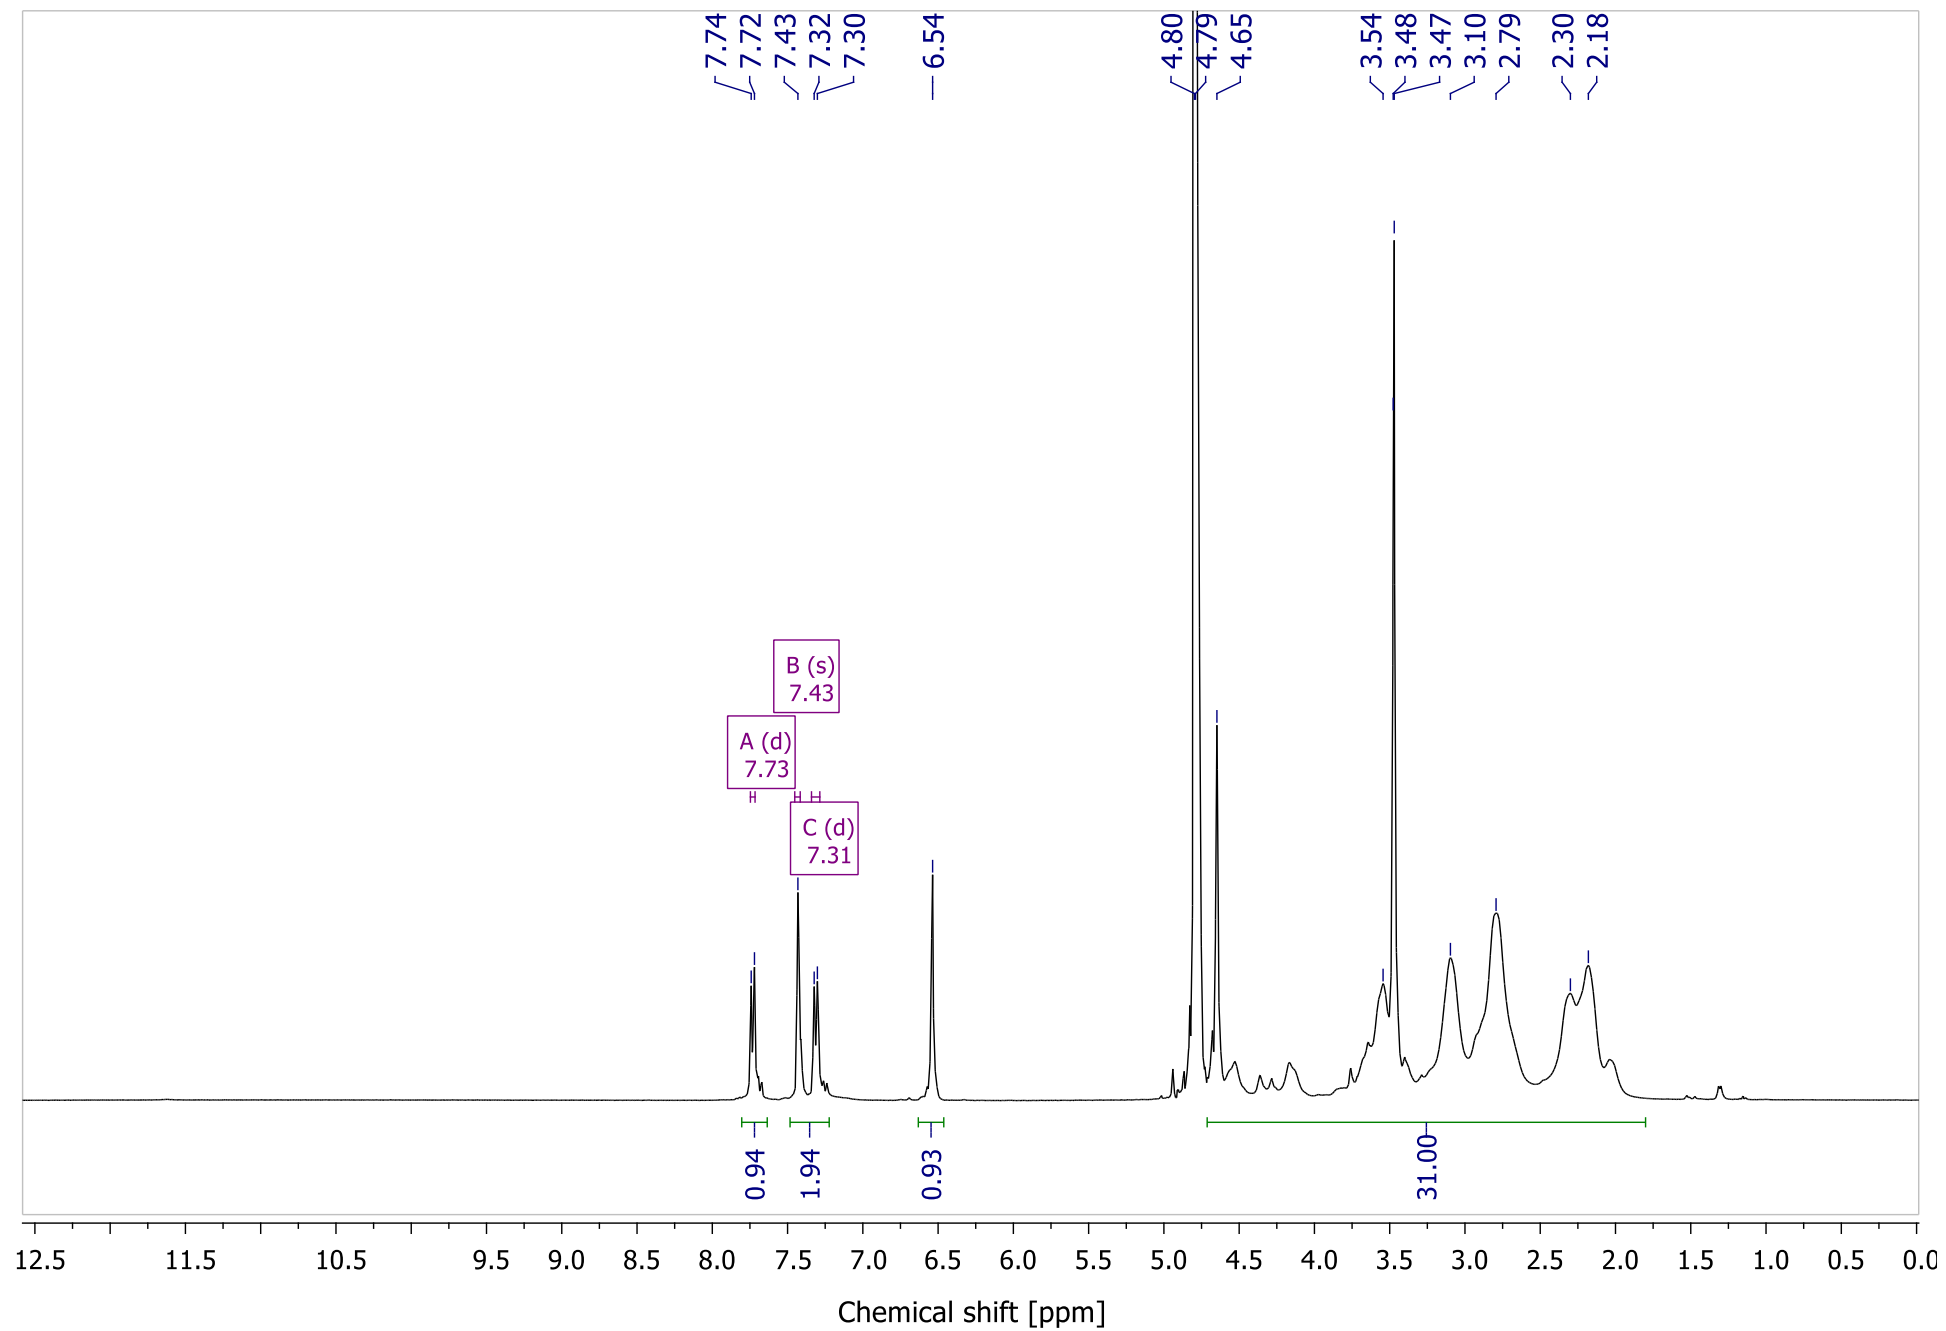

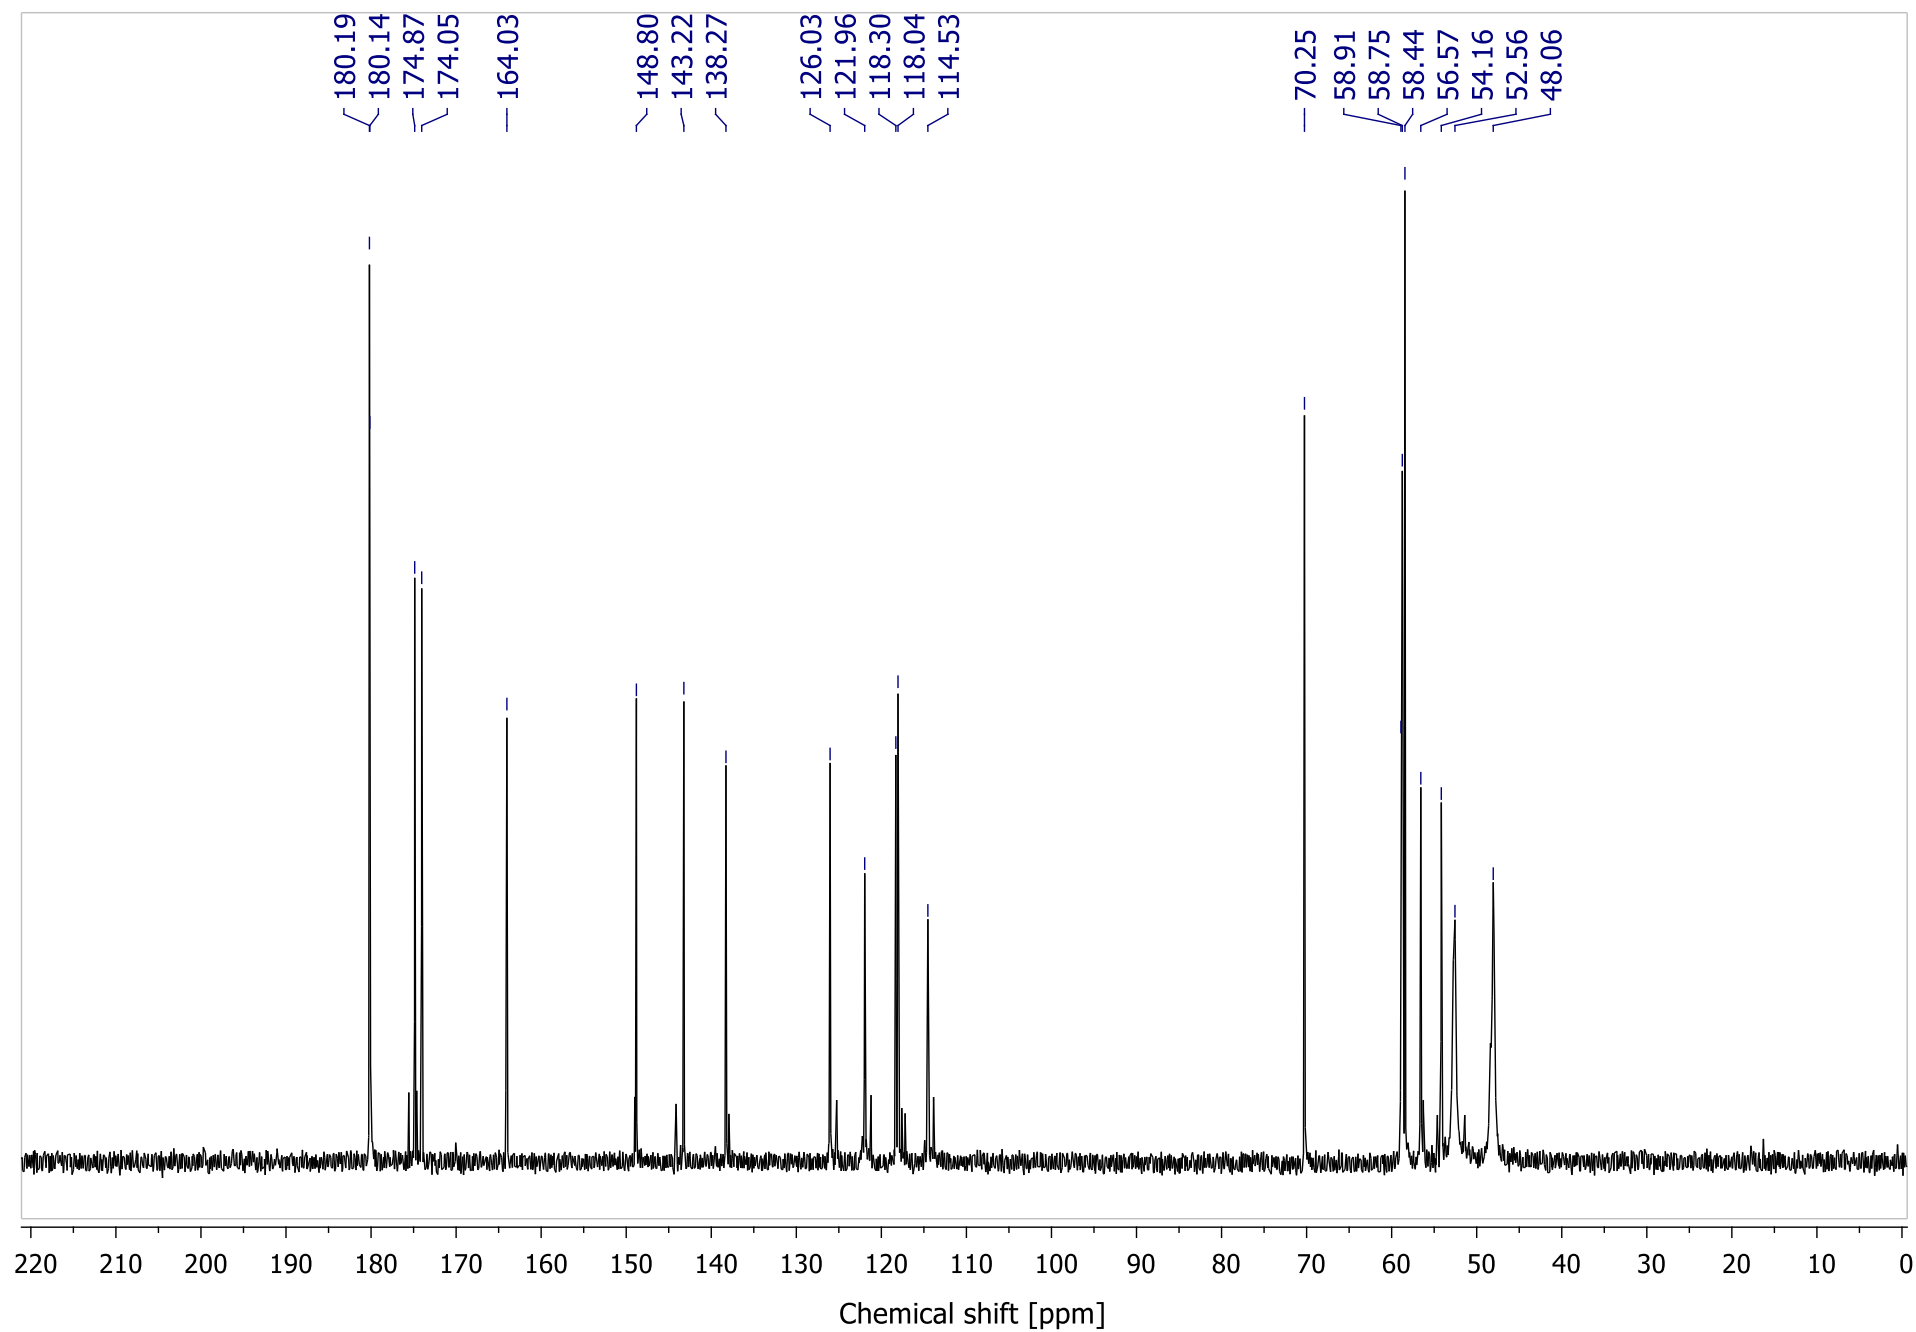



# DKS57\_078A

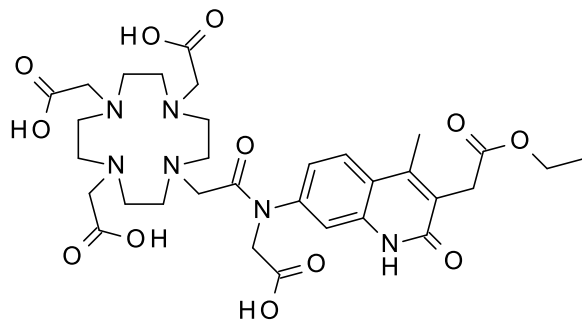

Formula Weight : 704.72(3)

Exact Mass : 704,30172

Formula :  $C_{32}H_{44}N_6O_{12}$

Composition : C 54.54% H 6.29%  
N 11.93% O 27.24%

C:\Xcalibur\...\DKS57\_078A\_1050\_5um

3/10/2018 5:51:45 PM

RT: 0.00 - 16.00

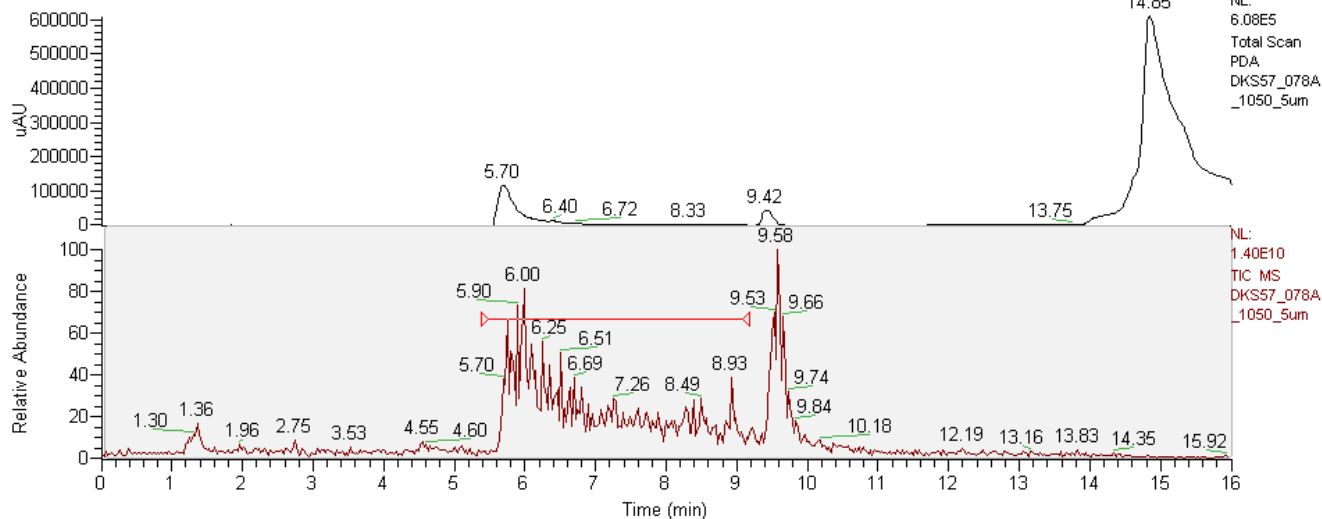

DKS57\_078A\_1050\_5um #341 RT: 5.68 AV: 1 NL: 6.22E5 microAU

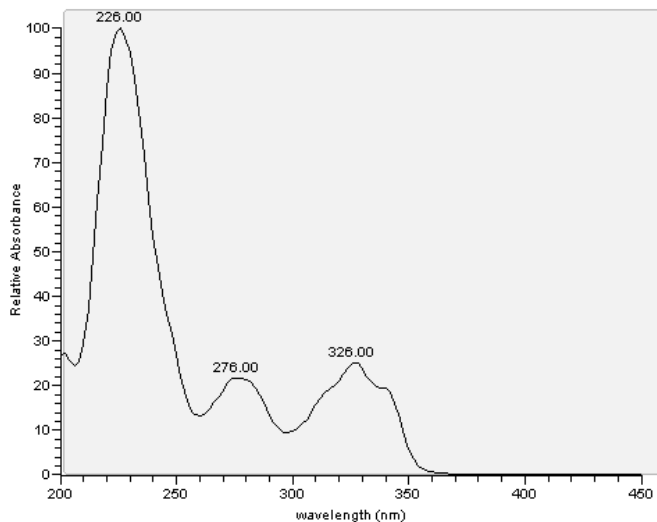

DKS57\_078A\_1050\_5um #203-342 RT: 5.46-9.06 AV: 140 NL: 6.43E8  
T: + c ESI Full ms [80.00-2000.00]

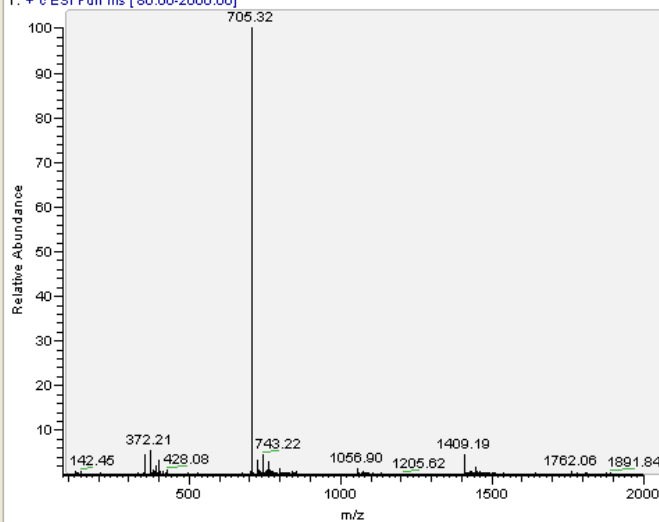

RT: 0.00 - 16.00

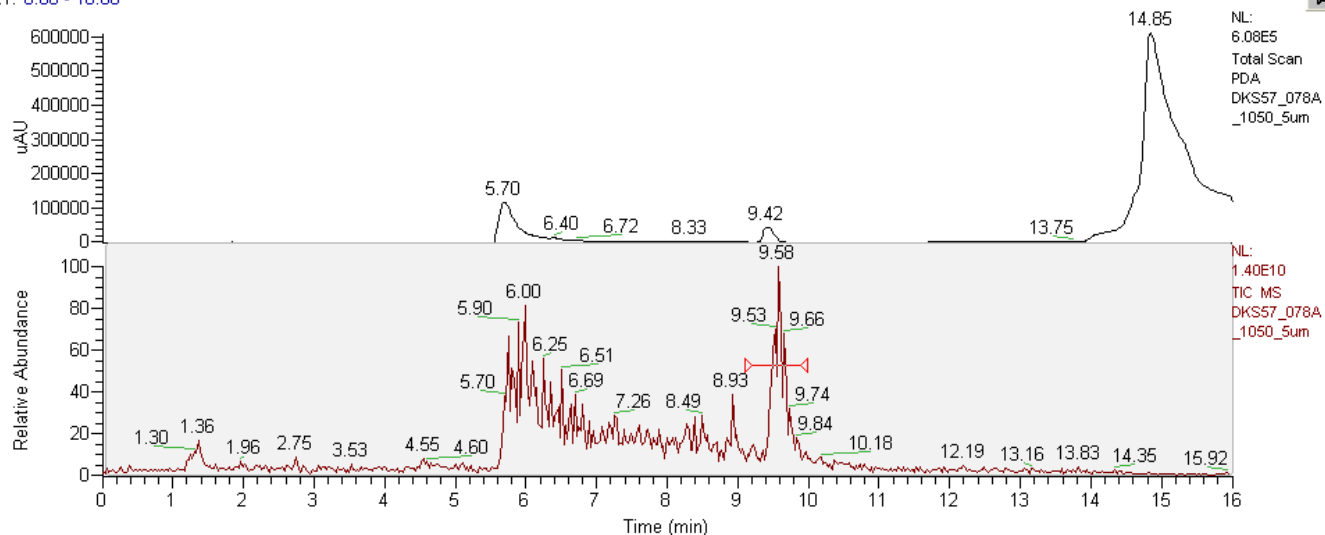

DKS57\_078A\_1050\_5um #341 RT: 5.68 AV: 1 NL: 6.22E5 microAU

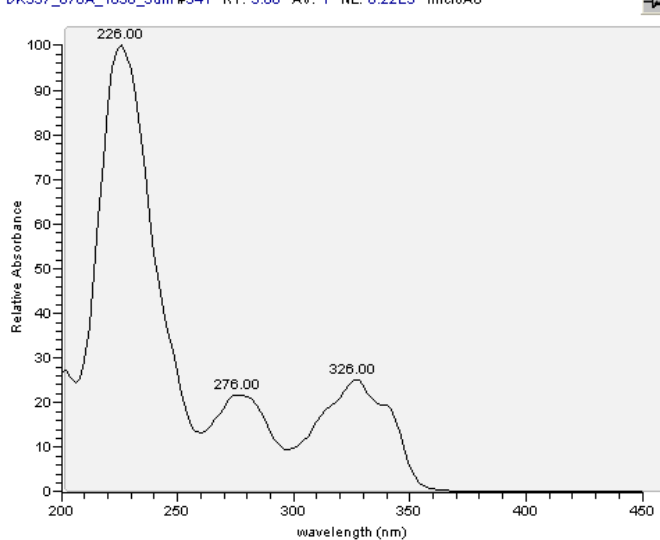DKS57\_078A\_1050\_5um #347-374 RT: 9.19-9.89 AV: 28 NL: 4.20E8  
T: + c ESI Full ms [80.00-2000.00]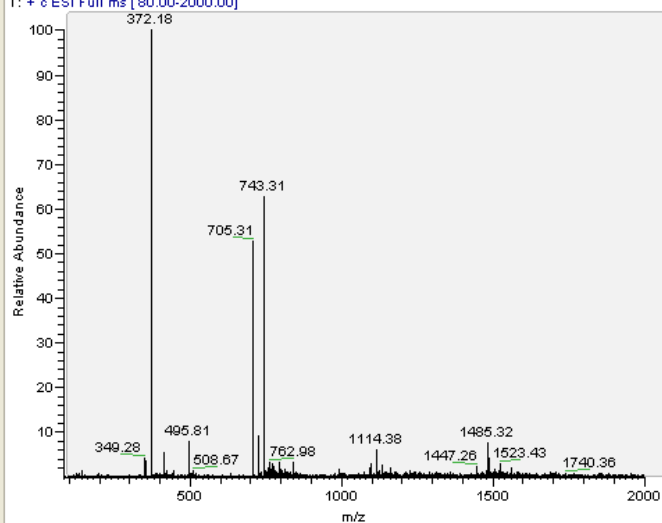

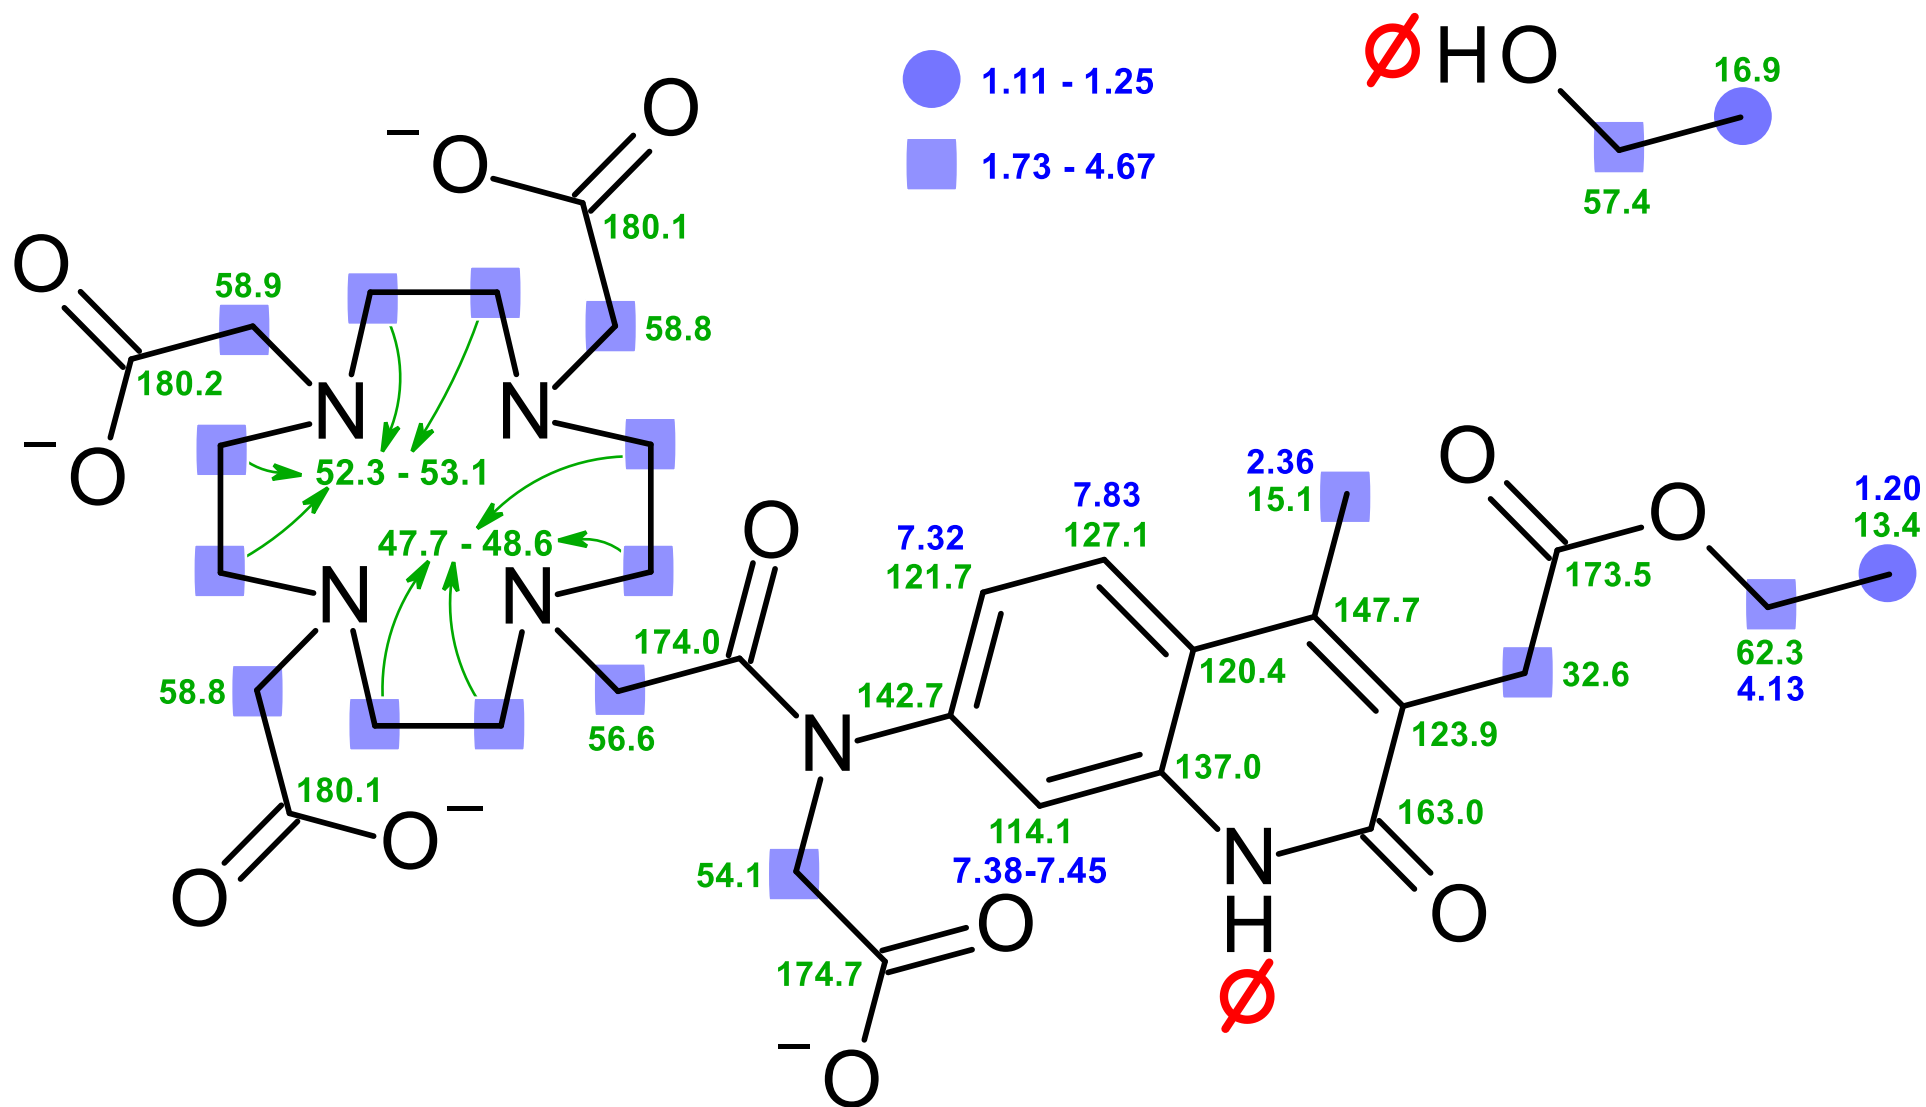

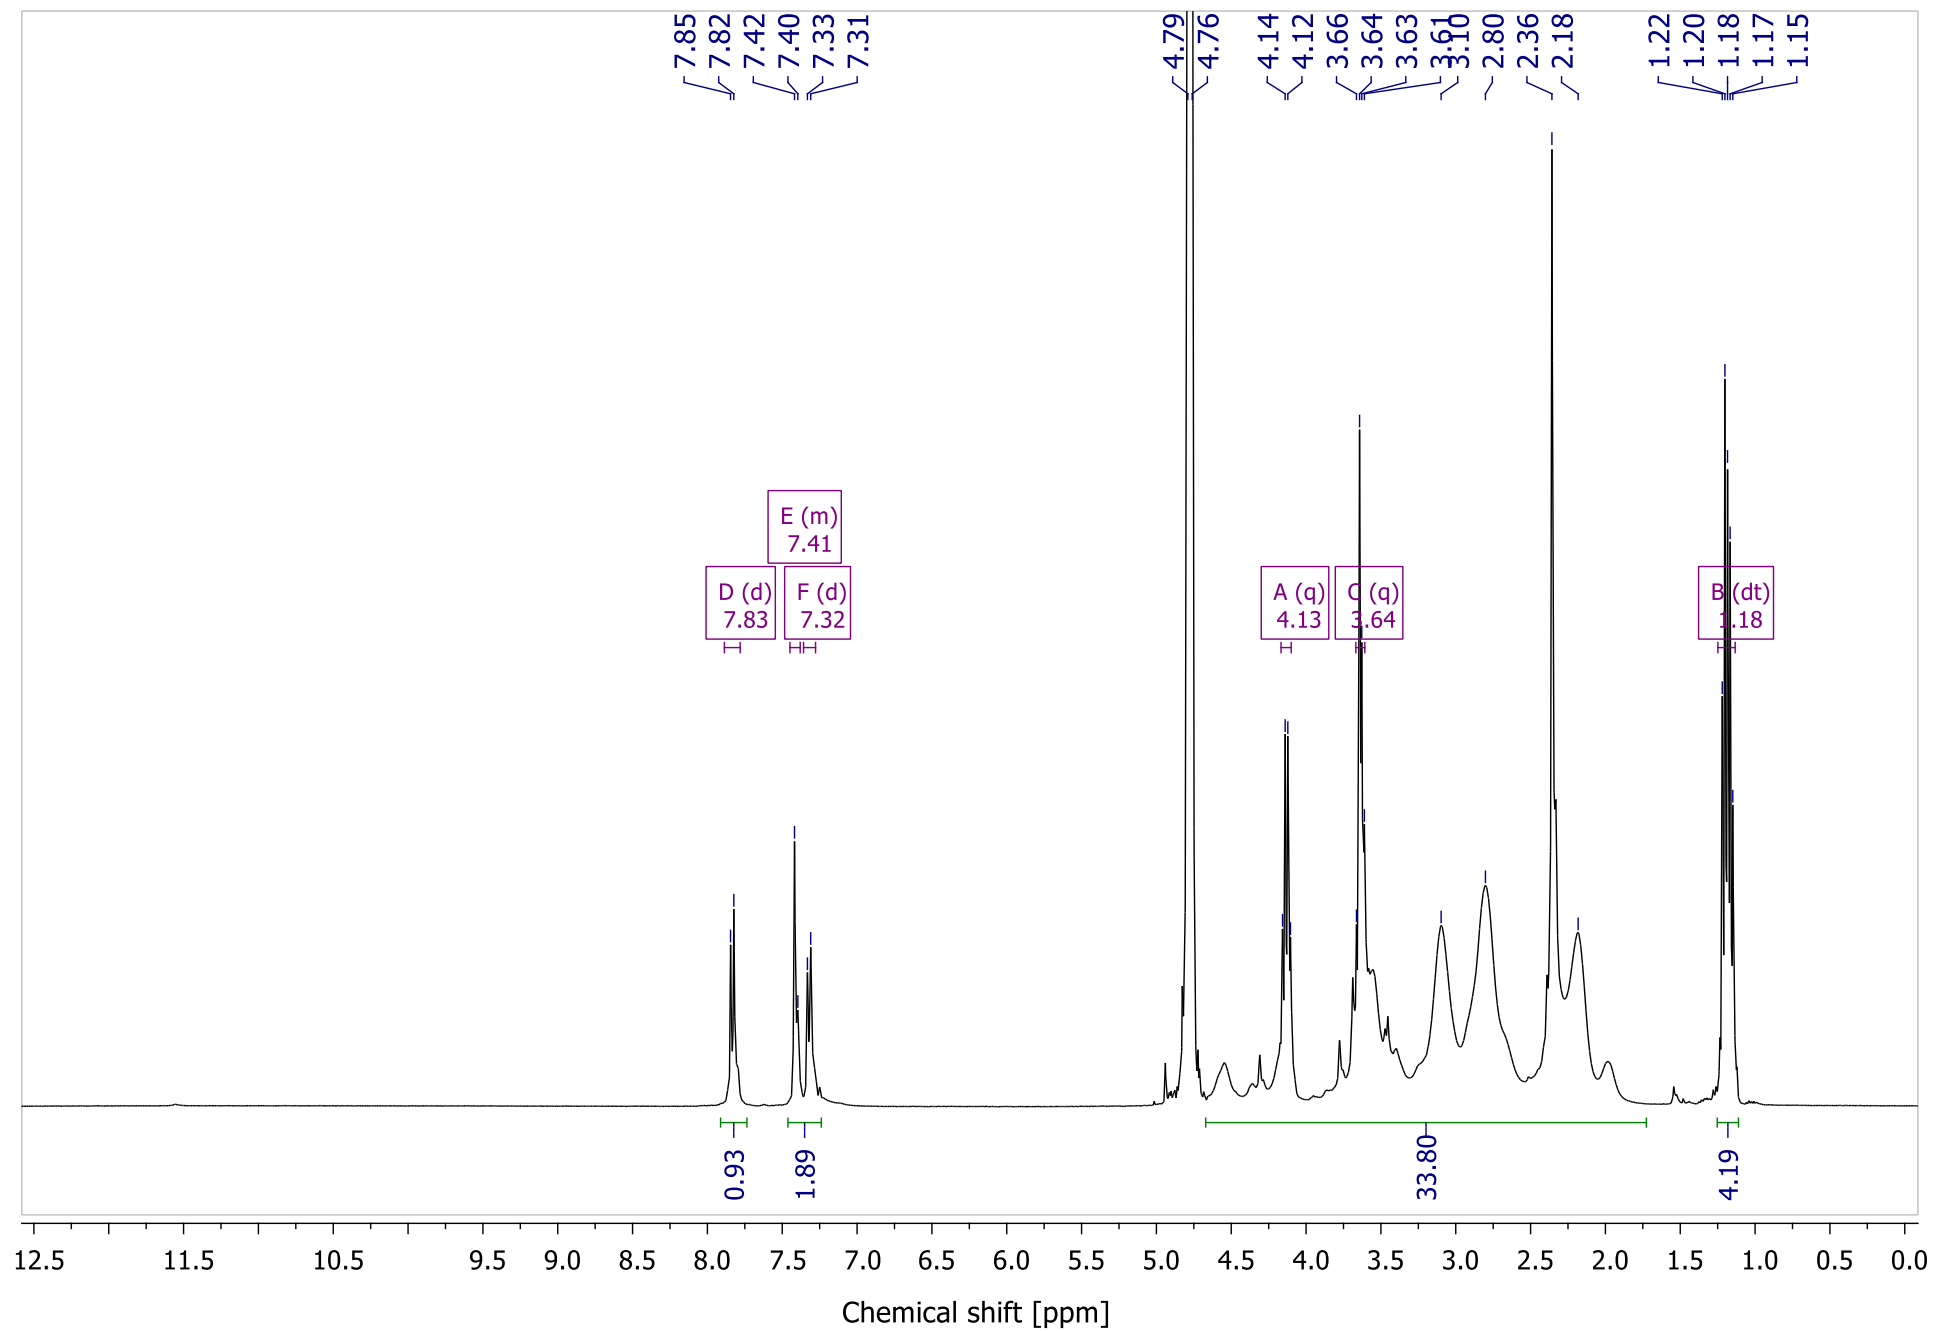

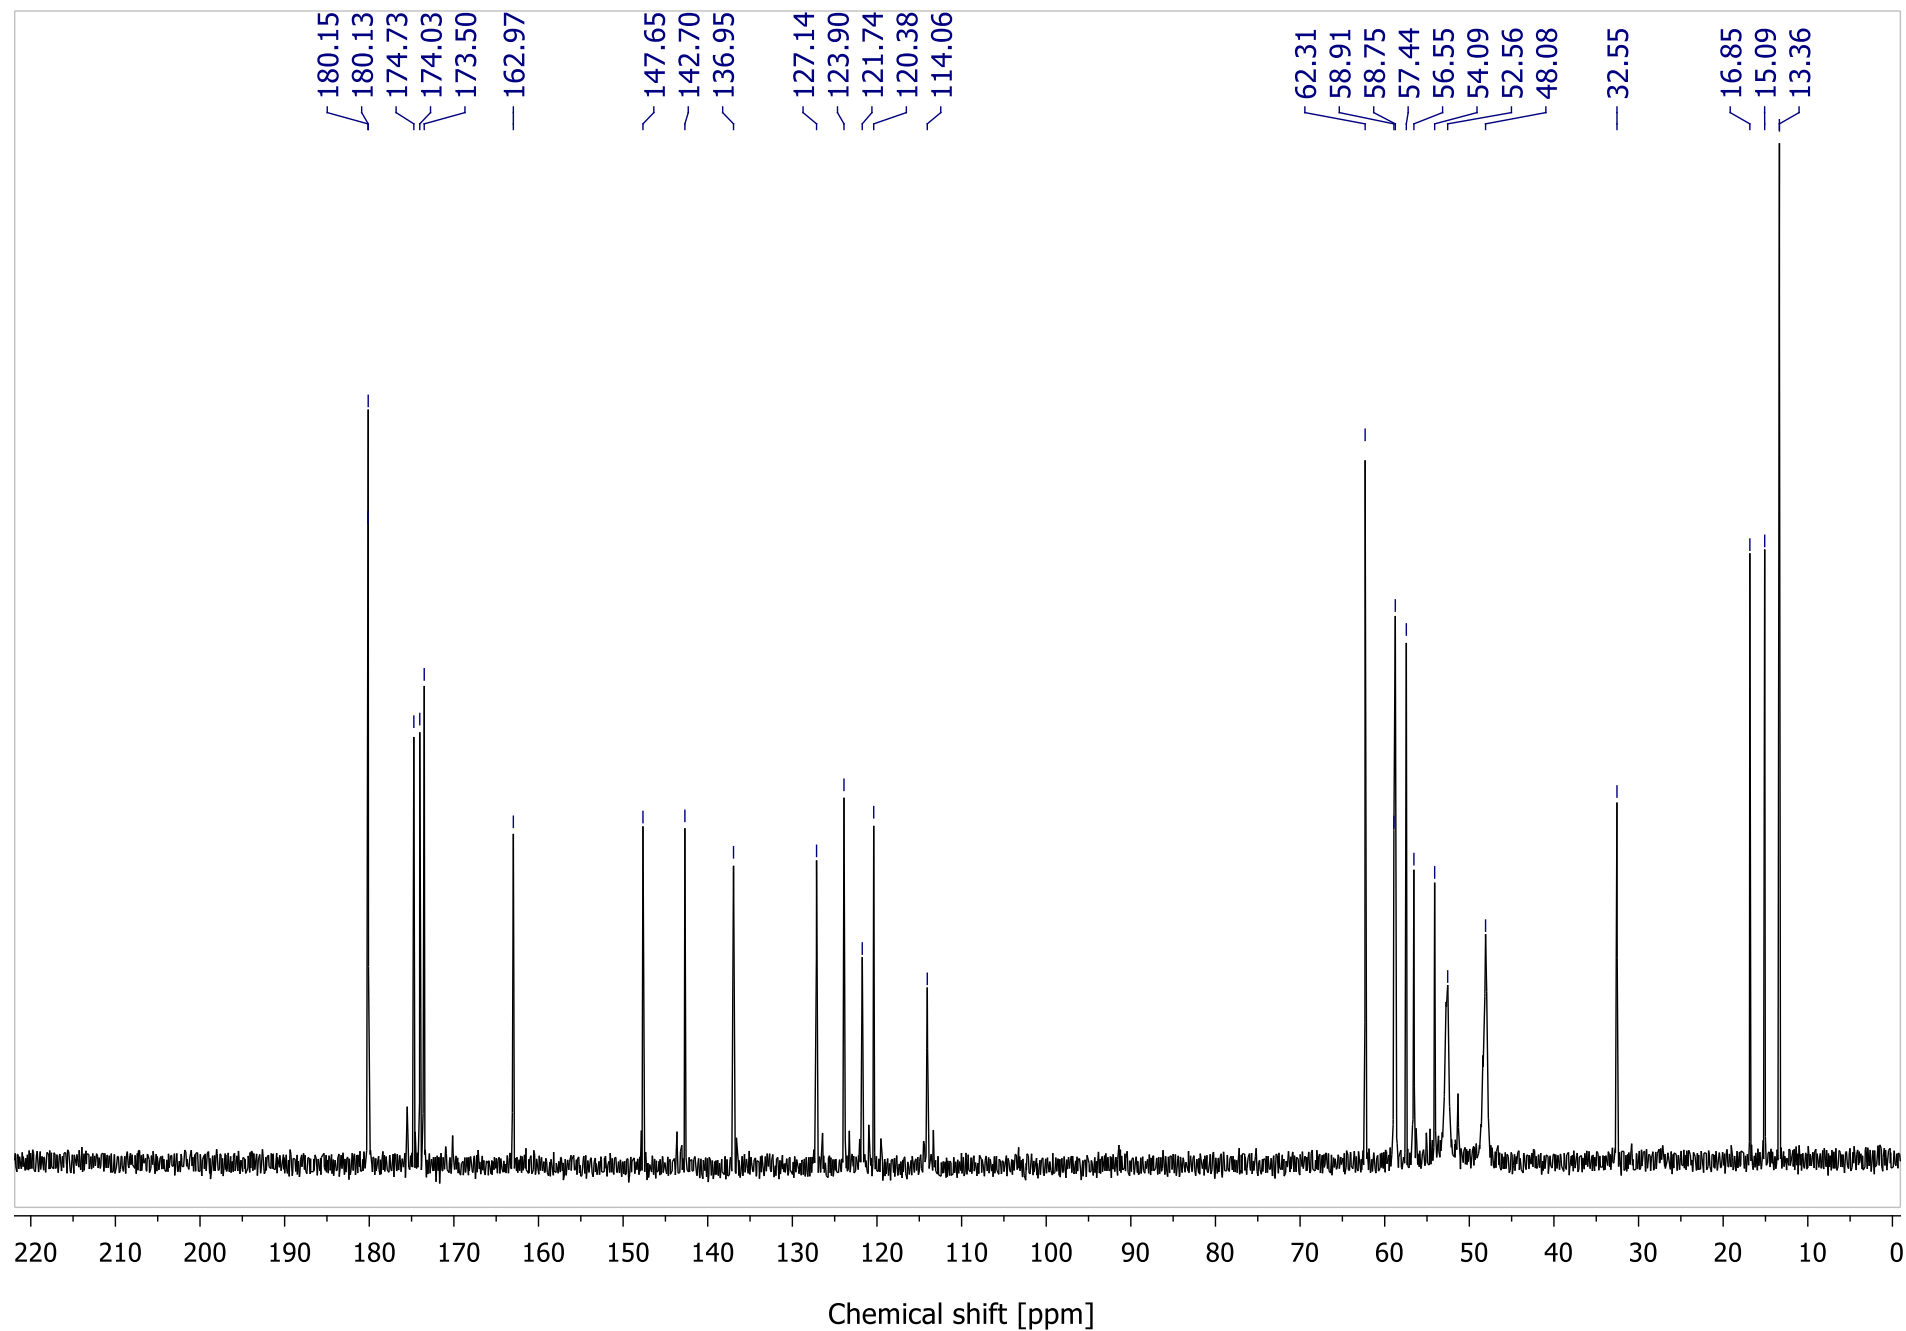

# DKS57\_081Ln (Eu, Tb, Gd)

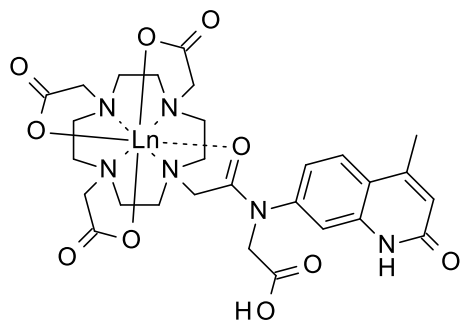

Formula Weight : 767.584

Exact Mass : 768.16269

Formula :  $C_{28}H_{35}N_6O_{10}Eu$

Composition : C 43.81% H 4.60%

N 10.95% O 20.84% Eu 19.80%

Formula Weight : 774.545

Exact Mass : 774.16681

Formula :  $C_{28}H_{35}N_6O_{10}Tb$

Composition : C 43.42% H 4.55%

N 10.85% O 20.66% Tb 20.52%

Formula Weight : 772.870

Exact Mass : 773.16557

Formula :  $C_{28}H_{35}N_6O_{10}Gd$

Composition : C 43.51% H 4.56%

N 10.87% O 20.70% Gd 20.35%

DKS57\_081Eu\_pure\_1020\_5um

3/9/2018 4:56:03 PM

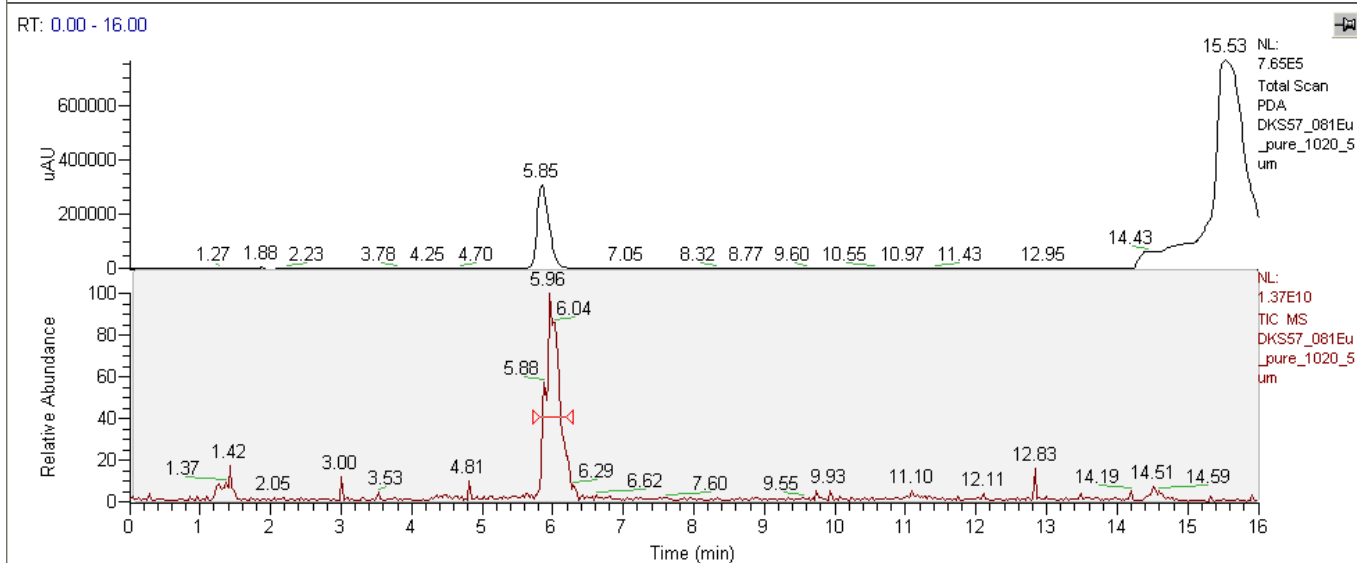

DKS57\_081Eu\_pure\_1020\_5um #345-358 RT: 5.75-5.97 AV: 14 NL: 1.12E6 microAU

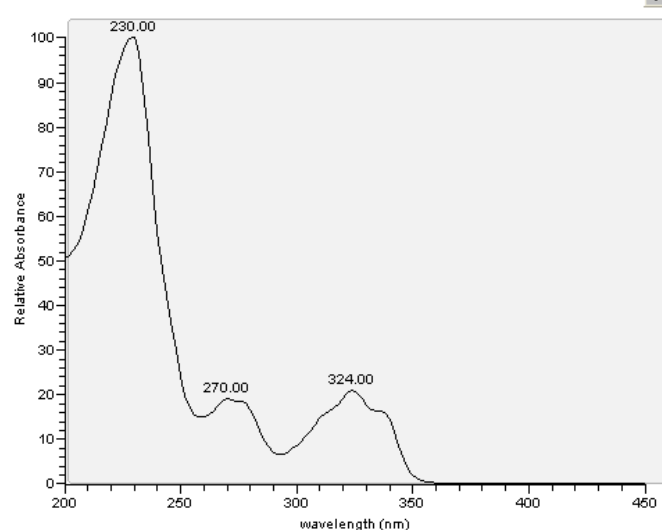

DKS57\_081Eu\_pure\_1020\_5um #212-227 RT: 5.81-6.19 AV: 16 NL: 3.75E8 T: + e ESI Full ms [80.00-2000.00]

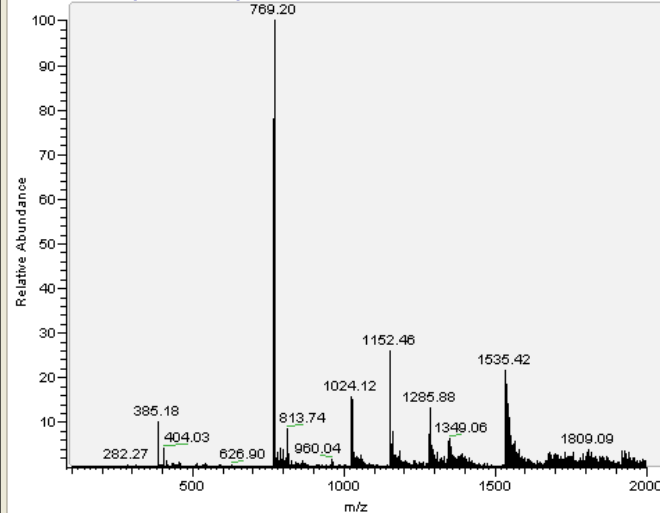

RT: 0.00 - 16.53

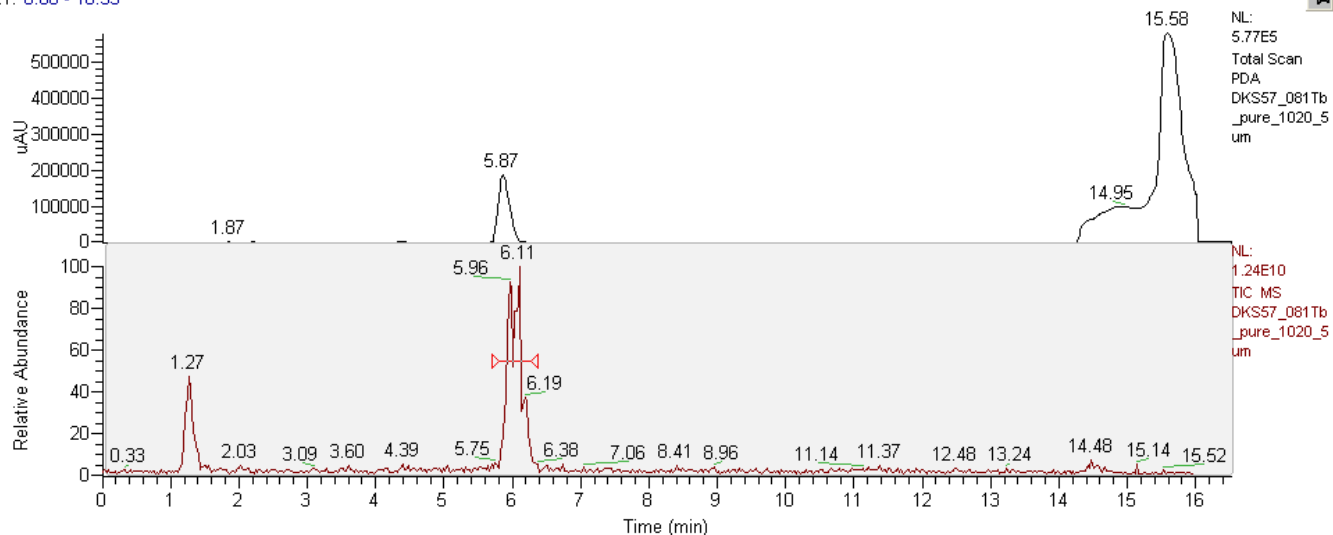

DKS57\_081Tb\_pure\_1020\_5um #345-359 RT: 5.75-5.98 AV: 15 NL: 6.94E5 microAU

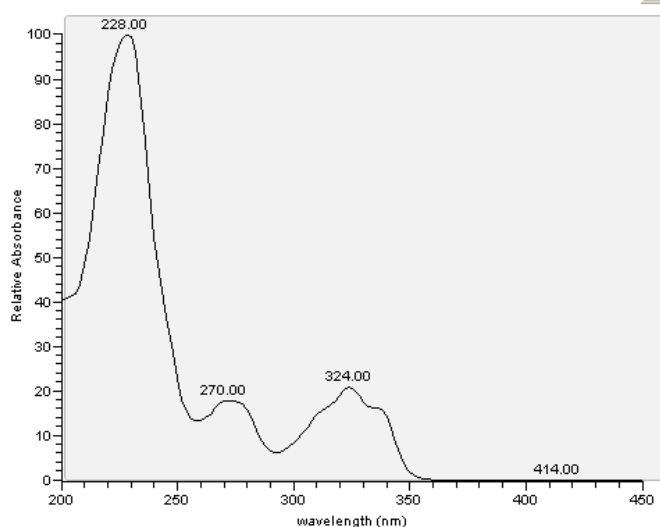DKS57\_081Tb\_pure\_1020\_5um #215-233 RT: 5.81-6.27 AV: 19 NL: 6.72E8  
T: + c ESI Full ms [80.00-2000.00]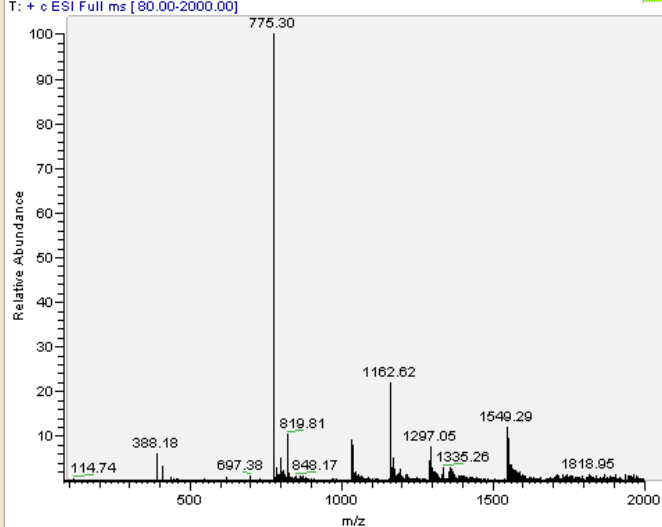

RT: 0.00 - 16.00

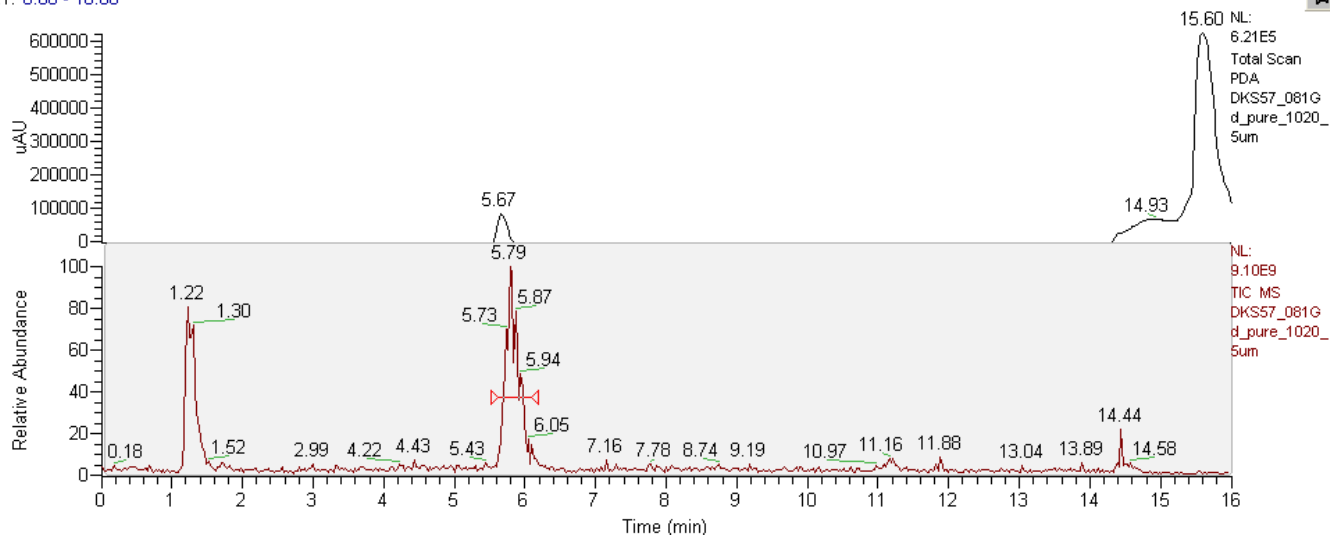

DKS57\_081Gd\_pure\_1020\_5um #340 RT: 5.67 AV: 1 NL: 6.34E5 microAU

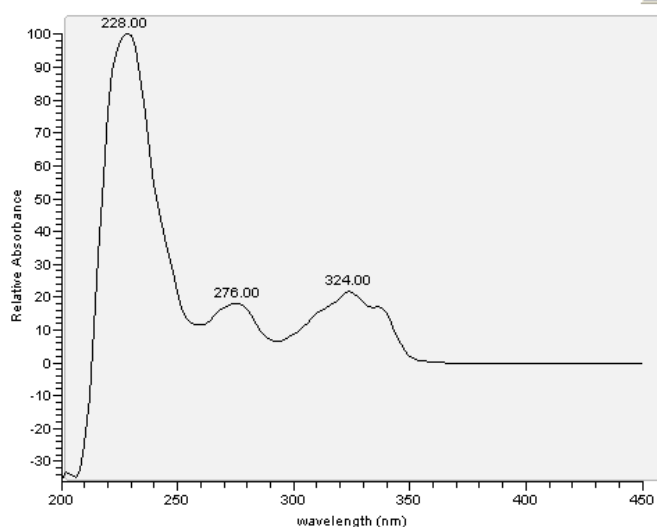DKS57\_081Gd\_pure\_1020\_5um #207-225 RT: 5.60-6.07 AV: 19 NL: 1.48E8  
T: + c ESI Full ms [80.00-2000.00]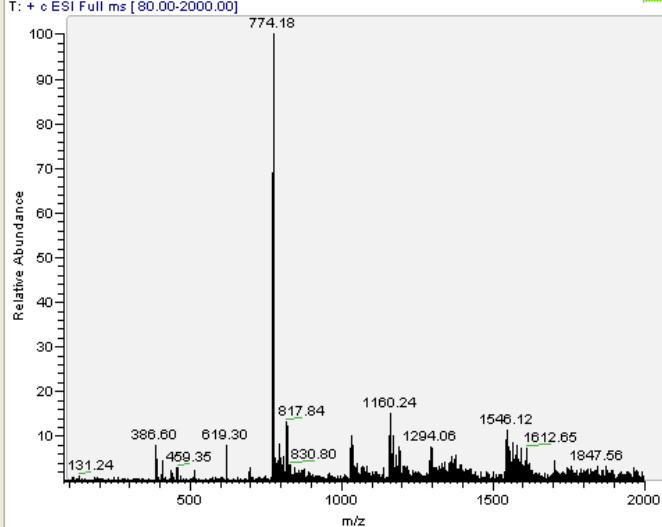



# DKS57\_083Ln (Eu, Tb, Gd)

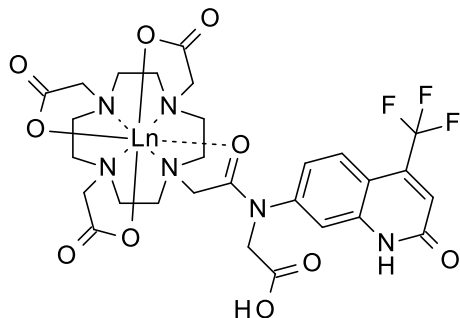

Formula Weight : 821.555

Exact Mass : 822.13443

Formula :  $C_{28}H_{32}F_3N_6O_{10}Eu$

Composition : C 40.94% H 3.93% F 6.94%  
N 10.23% O 19.47% Eu 18.50%

Formula Weight : 828.517

Exact Mass : 828.13854

Formula :  $C_{28}H_{32}F_3N_6O_{10}Tb$

Composition : C 40.59% H 3.89% F 6.88%  
N 10.14% O 19.31% Tb 19.18%

Formula Weight : 826.841

Exact Mass : 827.13730

Formula :  $C_{28}H_{32}F_3N_6O_{10}Gd$

Composition : C 40.67% H 3.90% F 6.89%  
N 10.16% O 19.35% Gd 19.35%

DKS57\_083Eu\_pure\_1020\_5um

3/9/2018 6:51:33 PM

RT: 0.00 - 16.53

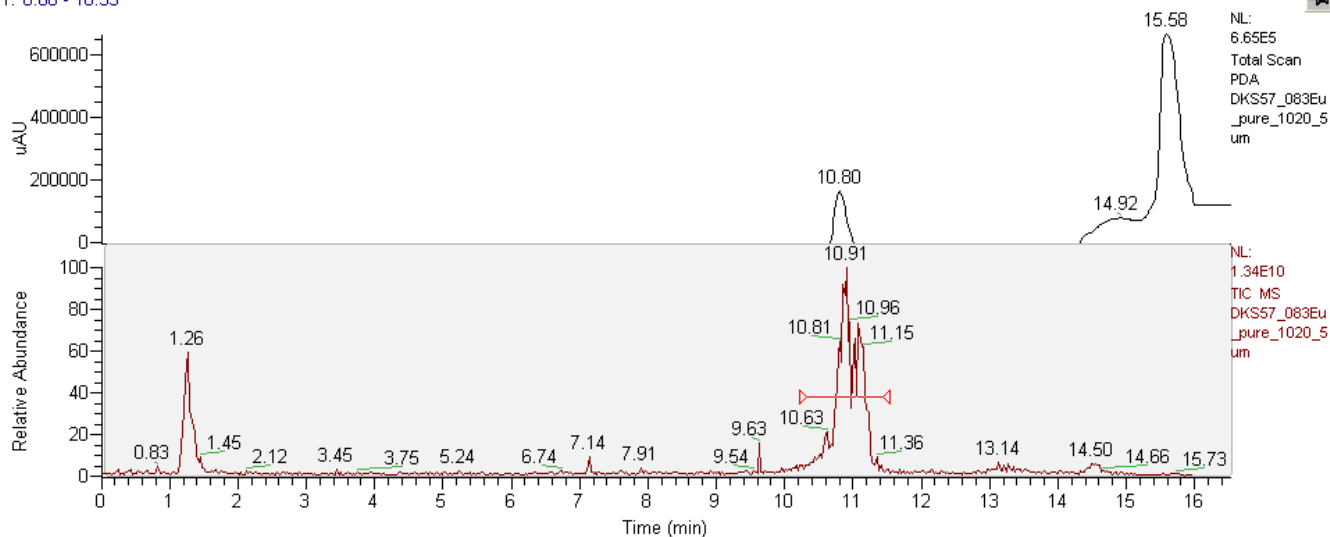

DKS57\_083Eu\_pure\_1020\_5um #648 RT: 10.80 AV: 1 NL: 8.77E5 microAU

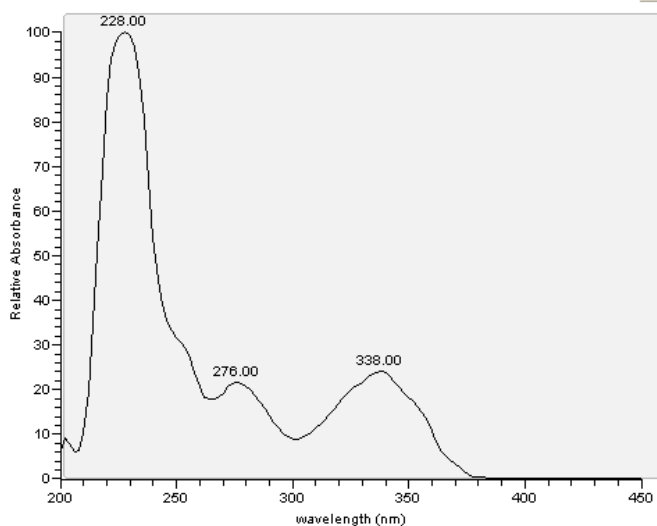

DKS57\_083Eu\_pure\_1020\_5um #381-425 RT: 10.31-11.44 AV: 45 NL: 2.54E8  
T: + c ESI Full ms [80.00-2000.00]

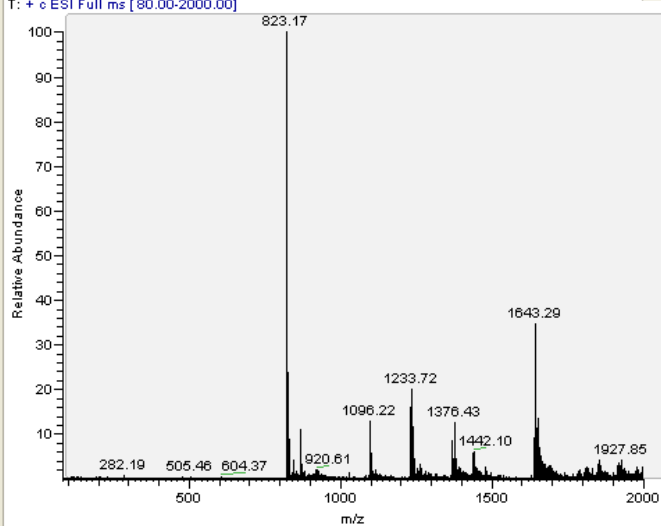

RT: 0.00 - 16.00

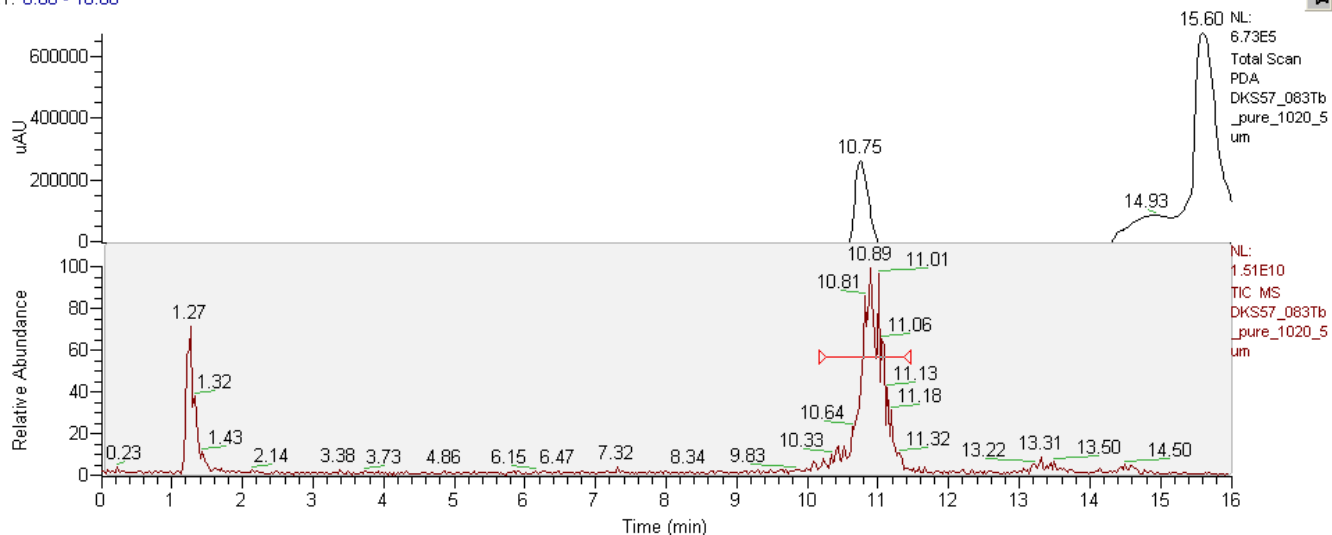

DKS57\_083Tb\_pure\_1020\_5um #645 RT: 10.75 AV: 1 NL: 1.25E6 microAU

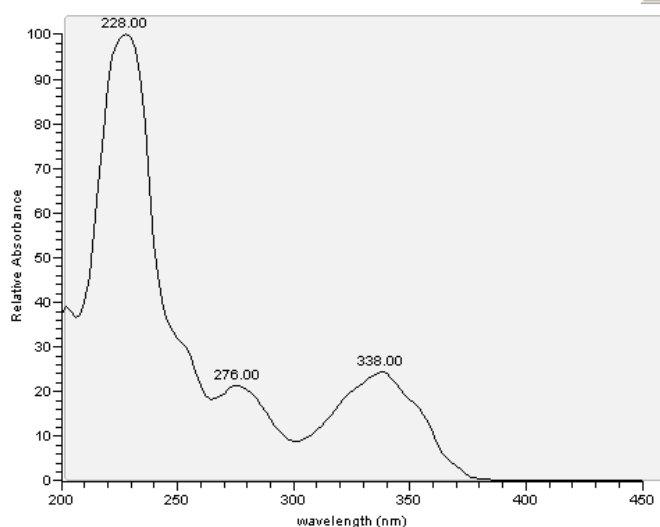DKS57\_083Tb\_pure\_1020\_5um #378-422 RT: 10.26-11.37 AV: 45 NL: 5.58E8  
T: + c ESI Full ms [80.00-2000.00]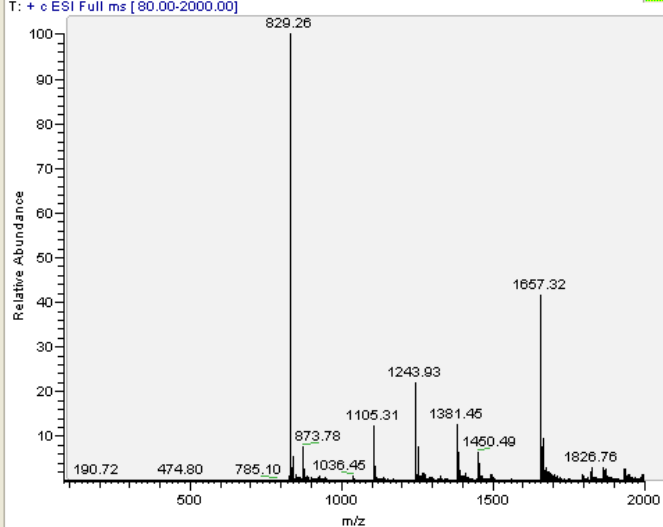

RT: 0.00 - 16.53

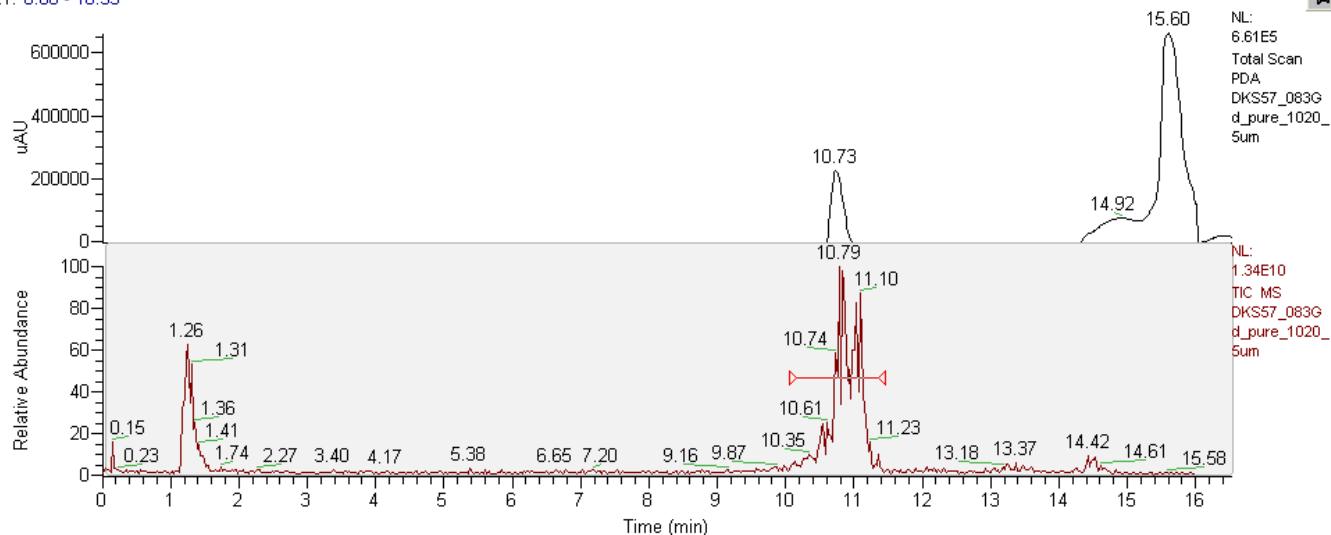

DKS57\_083Gd\_pure\_1020\_5um #644 RT: 10.73 AV: 1 NL: 1.13E6 microAU

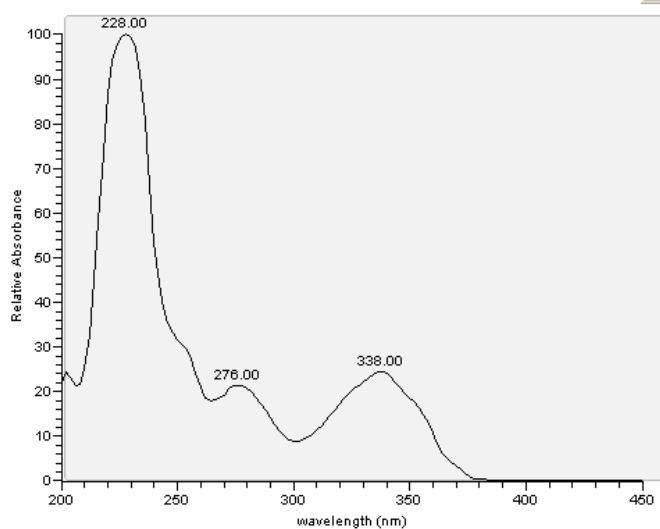DKS57\_083Gd\_pure\_1020\_5um #372-420 RT: 10.14-11.36 AV: 49 NL: 1.67E8  
T: + c ESI Full ms [80.00-2000.00]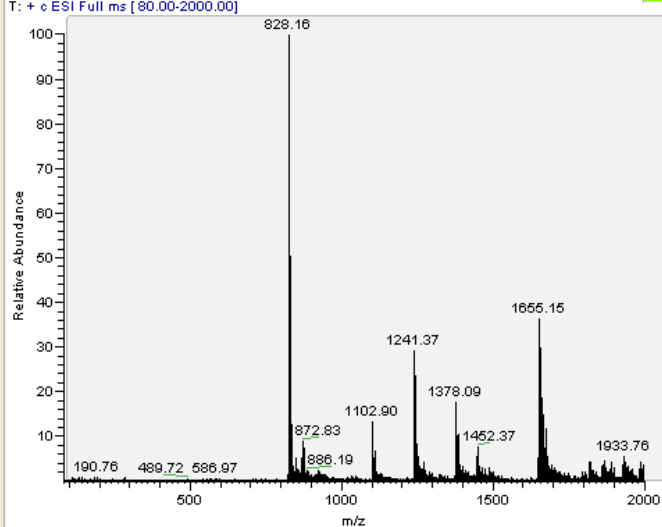

DKS57\_082Ln (Eu, Tb, Gd)

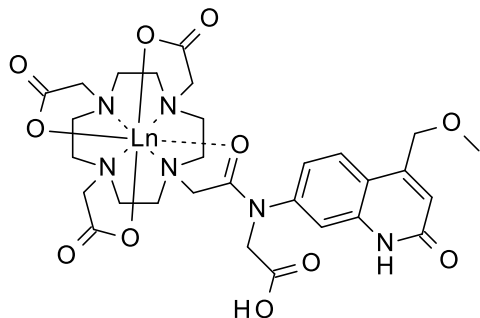

Formula Weight : 797.610

Exact Mass : 798.17326

Formula :  $C_{29}H_{37}N_6O_{11}Eu$

Composition : C 43.67% H 4.68%

N 10.54% O 22.06% Eu 19.05%

Formula Weight : 804.571

Exact Mass : 804.17737

Formula :  $C_{29}H_{37}N_6O_{11}Tb$

Composition : C 43.29% H 4.64%

N 10.45% O 21.87% Tb 19.75%

Formula Weight : 802.896

Exact Mass : 803.17613

Formula :  $C_{29}H_{37}N_6O_{11}Gd$

Composition : C 43.38% H 4.65%

N 10.47% O 21.92% Gd 19.59%

DKS57\_082Eu\_pure\_1020\_5um

3/9/2018 6:01:34 PM

RT: 0.00 - 16.00

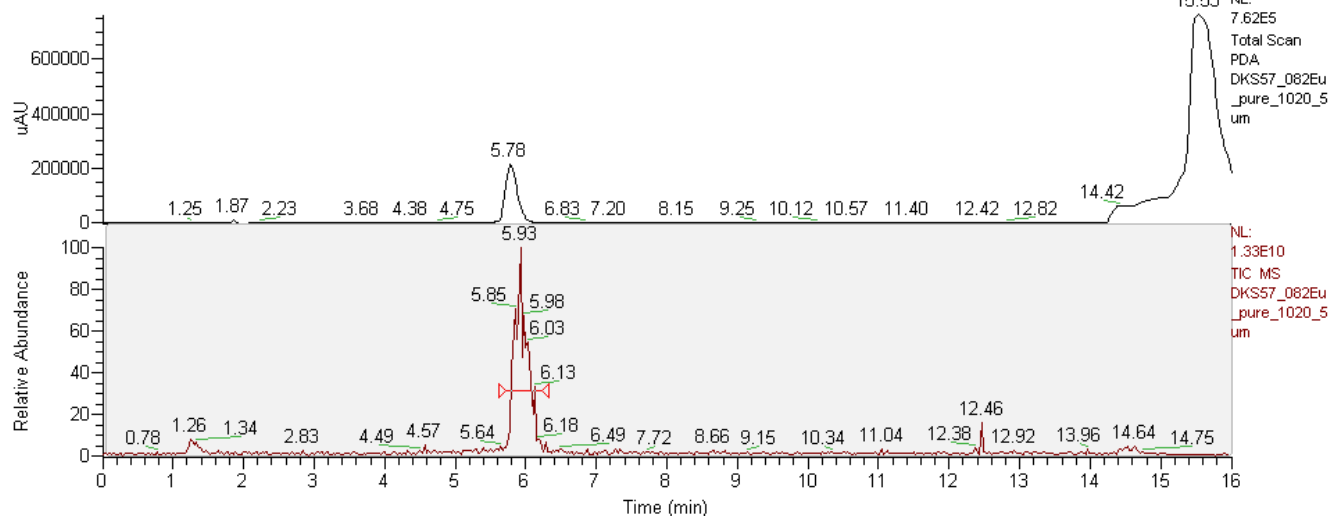

DKS57\_082Eu\_pure\_1020\_5um #341-352 RT: 5.68-5.87 AV: 12 NL: 7.91E5 microAU

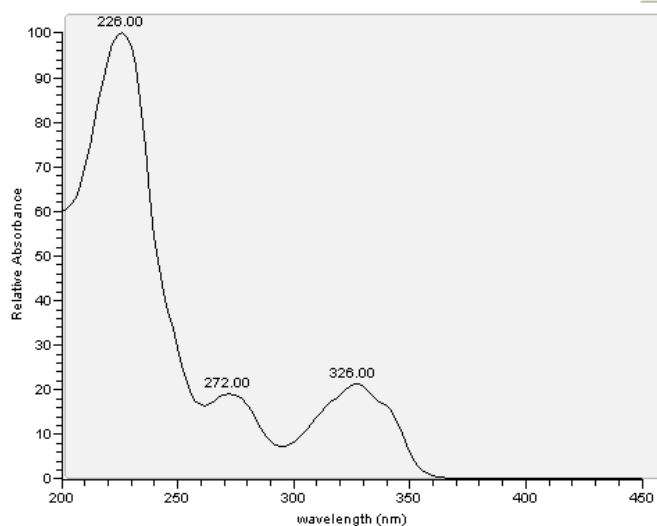

DKS57\_082Eu\_pure\_1020\_5um #208-229 RT: 5.70-6.23 AV: 22 NL: 2.77E8 T: + e ESI Full ms [80.00-2000.00]

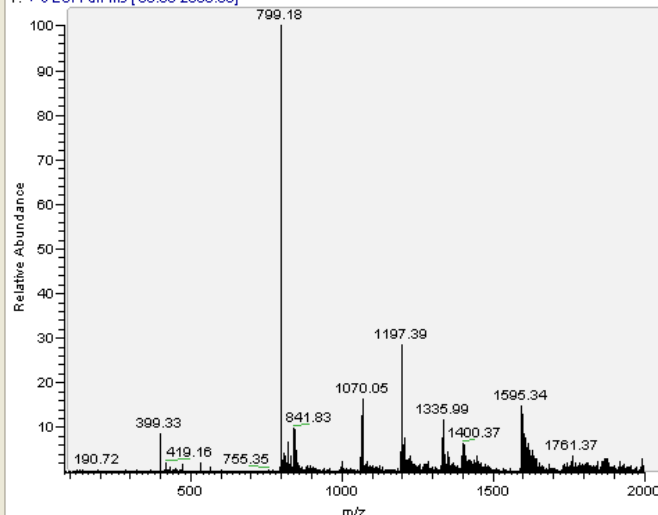

RT: 0.00 - 16.00

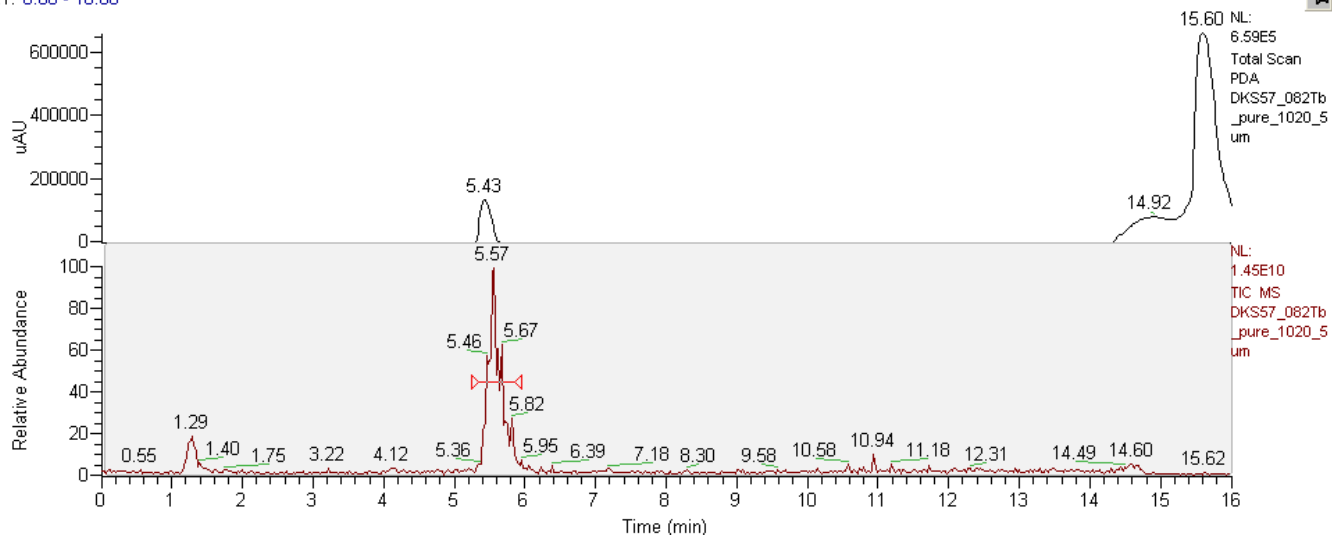

DKS57\_082Tb\_pure\_1020\_5um #326 RT: 5.43 AV: 1 NL: 9.01E5 microAU

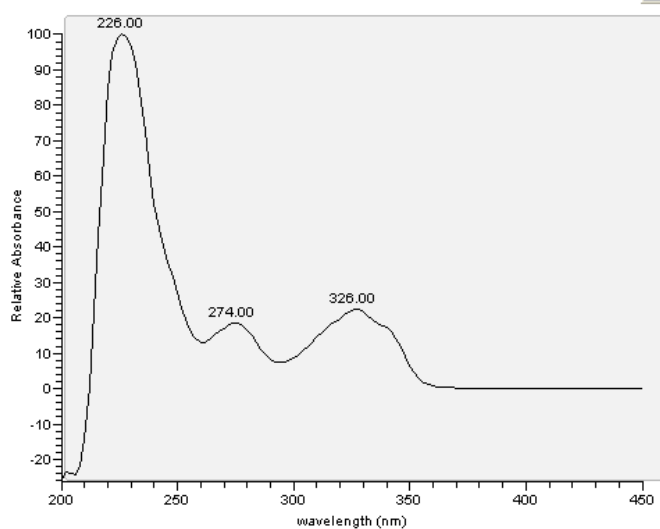DKS57\_082Tb\_pure\_1020\_5um #198-218 RT: 5.33-5.85 AV: 21 NL: 5.84E8  
T: + c ESI Full ms [ 80.00-2000.00]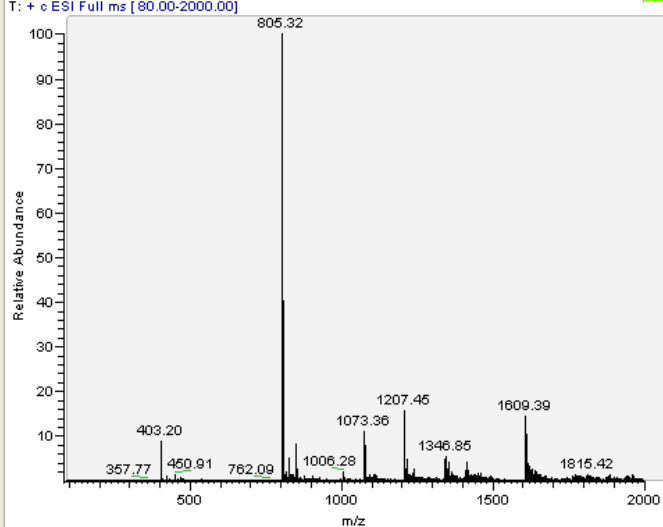

RT: 0.00 - 16.53

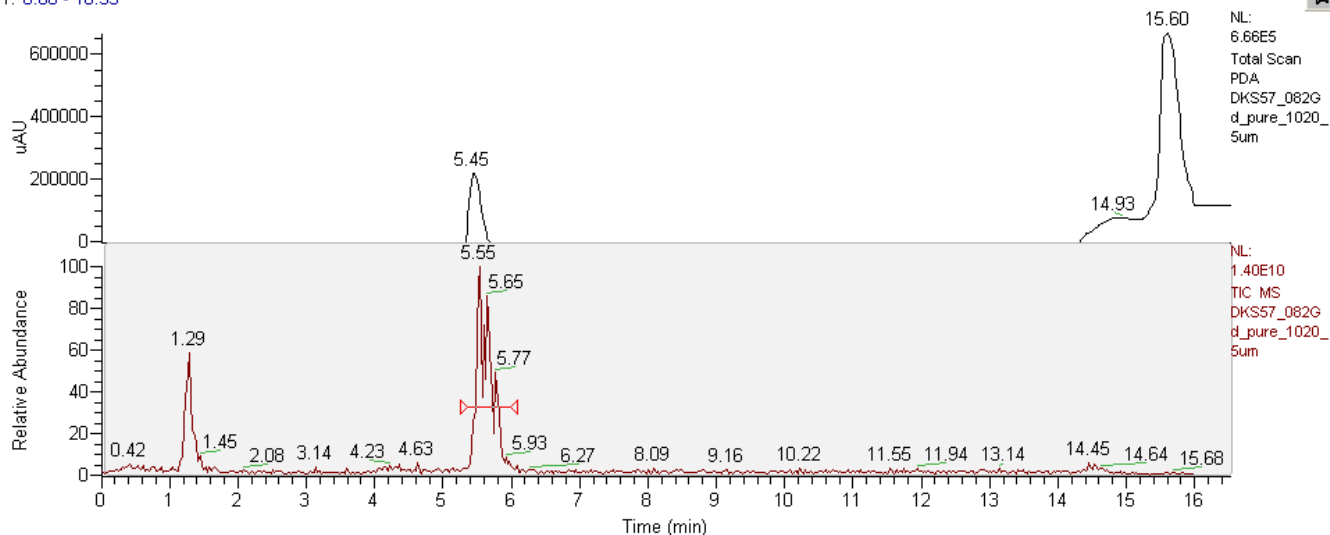

DKS57\_082Gd\_pure\_1020\_5um #327 RT: 5.45 AV: 1 NL: 1.28E6 microAU

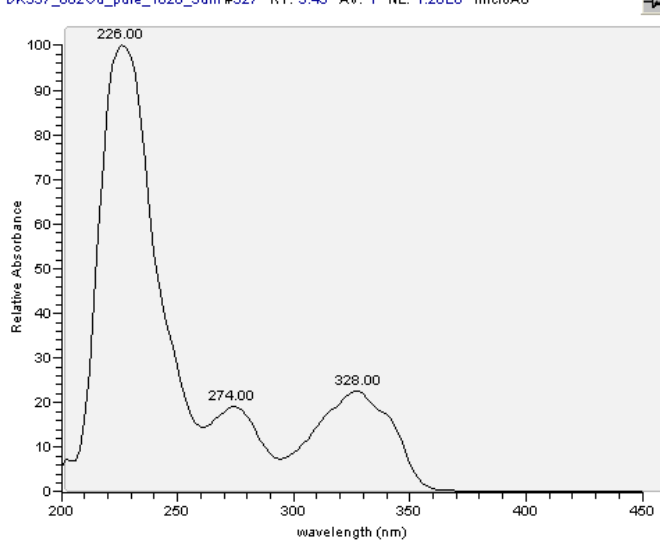DKS57\_082Gd\_pure\_1020\_5um #196-221 RT: 5.34-5.98 AV: 26 NL: 1.86E8  
T: + c ESI Full ms [80.00-2000.00]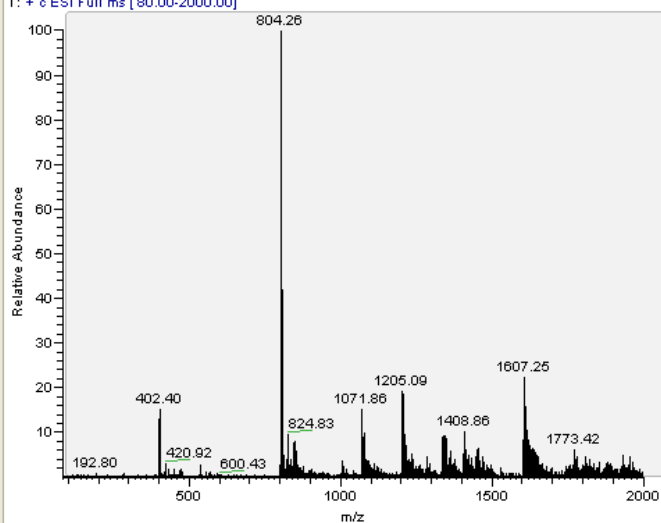

DKS57\_084Ln (Eu, Tb, Gd)

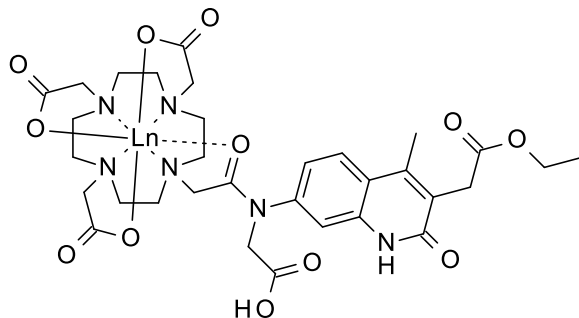

Formula Weight : 853.674

Exact Mass : 854.19947

Formula :  $C_{32}H_{41}N_6O_{12}Eu$

Composition : C 45.02% H 4.84%  
N 9.84% O 22.49% Eu 17.80%

Formula Weight : 860.635

Exact Mass : 860.20359

Formula :  $C_{32}H_{41}N_6O_{12}Tb$

Composition : C 44.66% H 4.80%  
N 9.77% O 22.31% Tb 18.47%

Formula Weight : 858.960

Exact Mass : 859.20235

Formula :  $C_{32}H_{41}N_6O_{12}Gd$

Composition : C 44.75% H 4.81%  
N 9.78% O 22.35% Gd 18.31%

DKS57\_084Eu\_pure\_1020\_5um

3/9/2018 7:41:47 PM

RT: 0.00 - 16.53

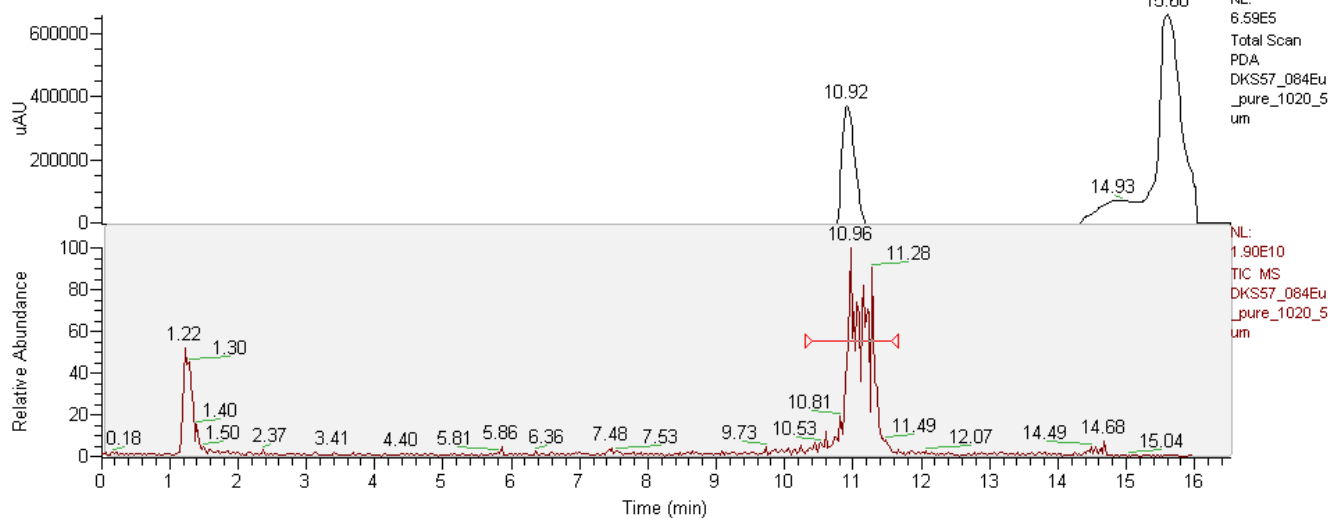

DKS57\_084Eu\_pure\_1020\_5um #655 RT: 10.92 AV: 1 NL: 2.02E6 microAU

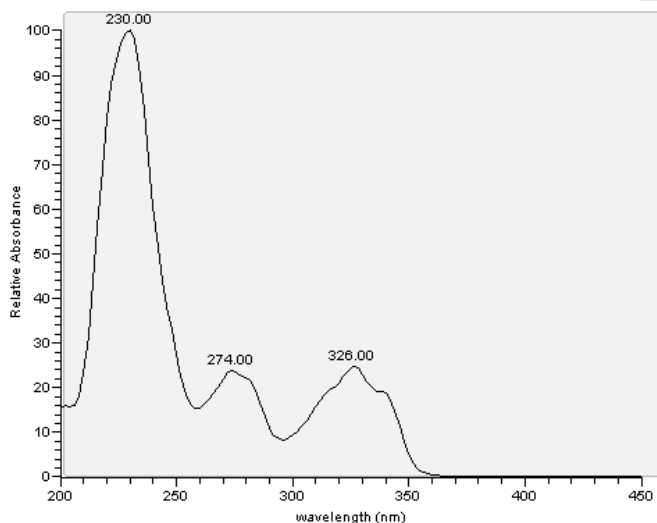

DKS57\_084Eu\_pure\_1020\_5um #384430 RT: 10.40-11.56 AV: 47 NL: 3.38E8  
T: + e ESI Full ms [80.00-2000.00]

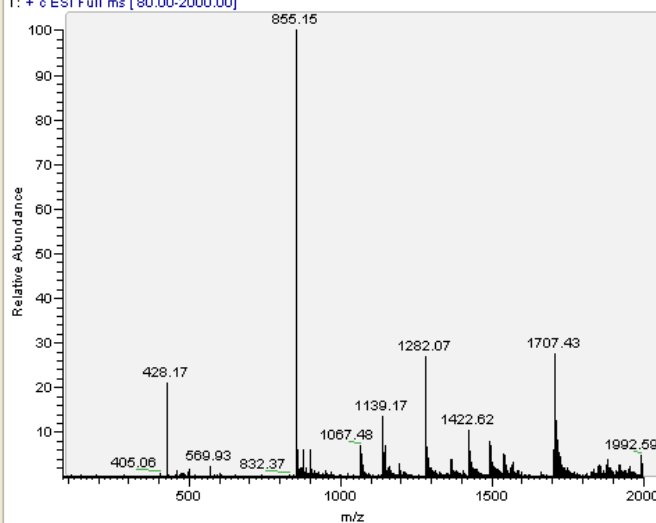

RT: 0.00 - 16.00

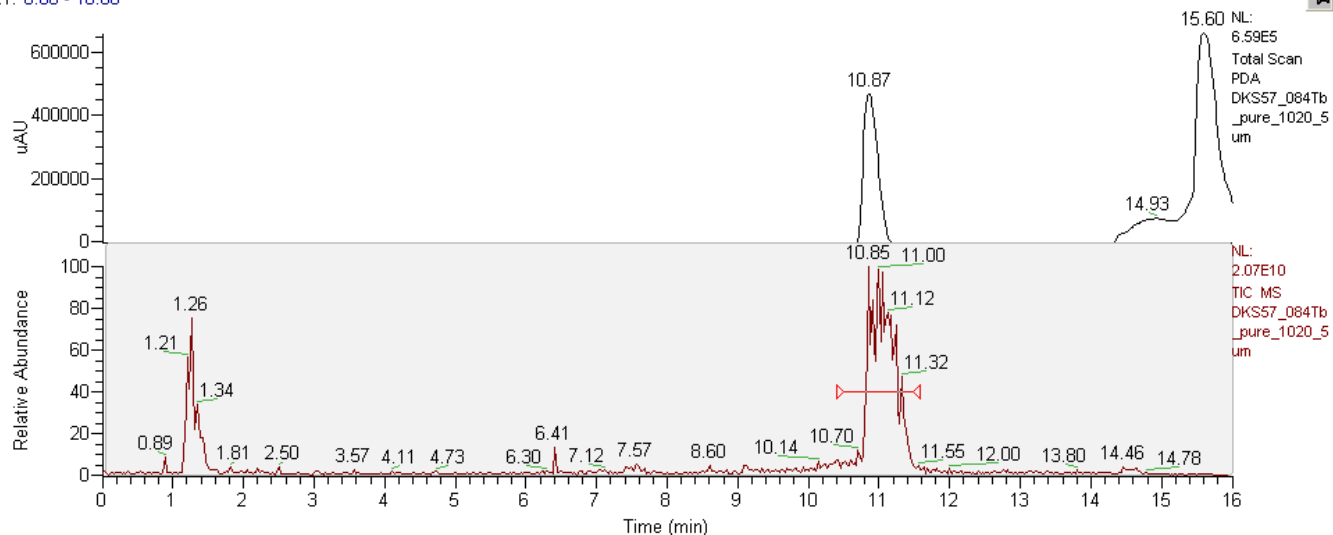

DKS57\_084Tb\_pure\_1020\_5um #652 RT: 10.87 AV: 1 NL: 2.36E6 microAU

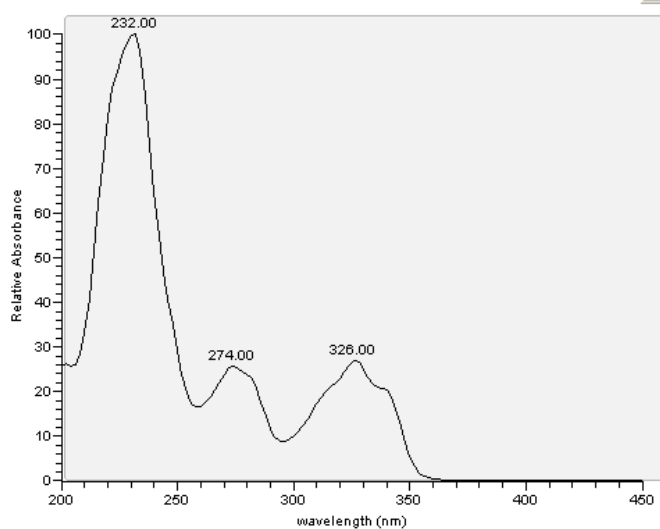DKS57\_084Tb\_pure\_1020\_5um #389-429 RT: 10.48-11.47 AV: 41 NL: 9.47E8  
T: + c ESI Full ms [80.00-2000.00]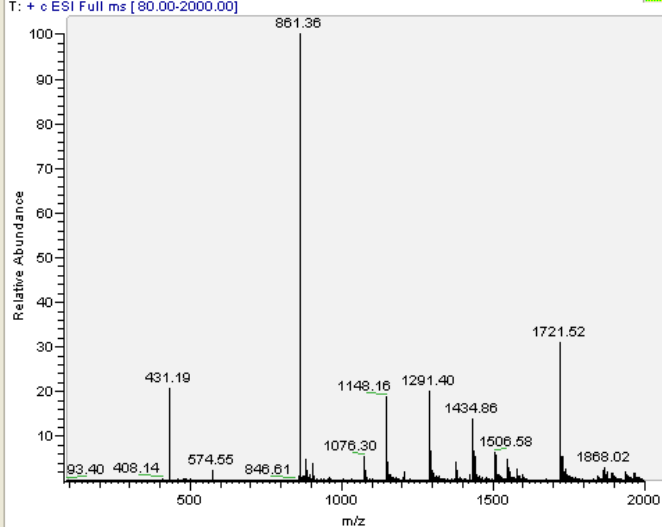



RT: 0.00 - 16.53

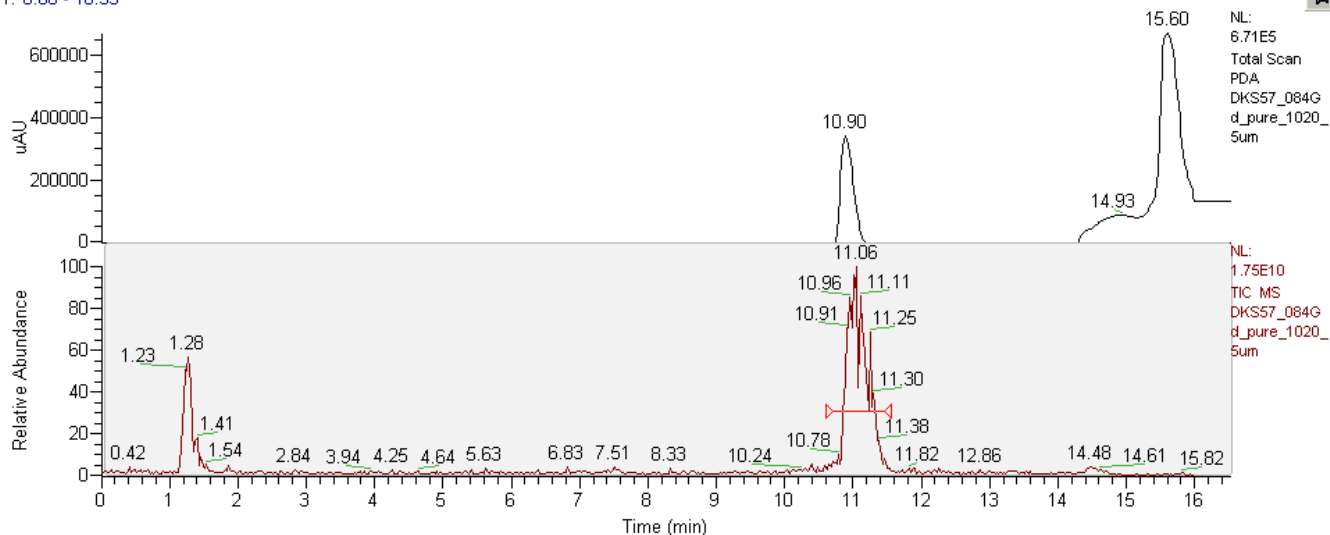

DKS57\_084Gd\_pure\_1020\_5um #653 RT: 10.88 AV: 1 NL: 1.83E6 microAU

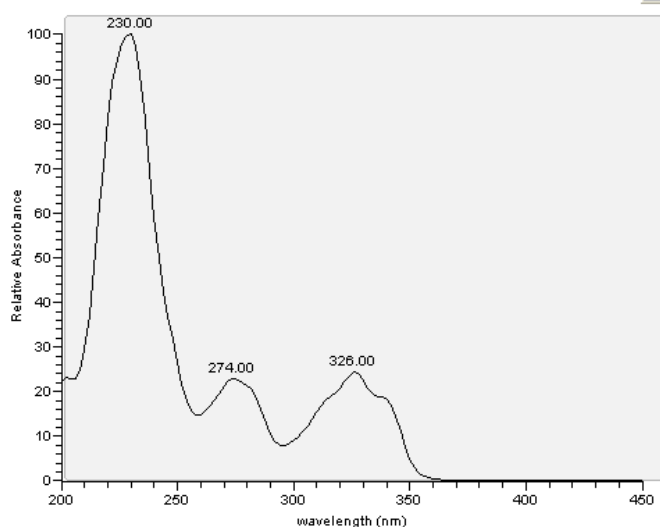DKS57\_084Gd\_pure\_1020\_5um #394424 RT: 10.71-11.46 AV: 31 NL: 2.68E8  
T: + c ESI Full ms [80.00-2000.00]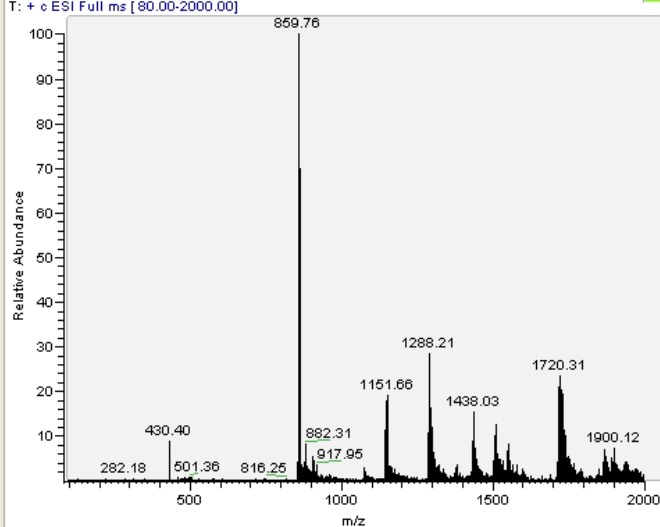

Supplement: c8dt01270a1.pdf [file c8dt01270a1.pdf]
